# Supplementary material
Source: publisher figshare collection journal article supplement (https://gsapubs.figshare.com/articles/dataset/_/20477703)
Supplement: Supplementary file 1 [file 1]

## Sheet: Supplementary table 1
Supplemental Table S1: Zircon Hf isotopes (North Atlantic Craton), including new analyses as indicated by source = "This work"
Sample ID	Analysis No.	Age (Ma)	2 se	Analysis interp.	Discordance	176Hf/177Hf	2 se	176Lu/177Hf	176Yb/177Hf	180Hf/177Hf	2 se	Hf source reference	176Hf/177Hfi	2 se	εHfi	2 se	TDM (Ga)	TDM2 (Ga)	Province	Lithology	Lat.	Long.	Age source reference
237	237-1.1	2820.89	6.17289	X	1.45068	0.280888	3.9e-05	0.001872	0.0728	1.88677	0.0002	This work	0.280787	4e-05	-6.45019	1.42365	3320.83	3594.62	Tuno	Charnockite - metatonalite	65.4124	-52.9002	Steenfelt et al., 2020 PR
237	237-2.1	2826.36	26.5044	X	1.23166	0.280887	5e-05	0.001725	0.0627	1.88687	0.00017	This work	0.280794	5e-05	-6.08071	1.77959	3309.42	3576.98	Tuno	Charnockite - metatonalite	65.4124	-52.9002	Steenfelt et al., 2020 PR
237	237-3.1	2834.87	12.329	X	2.7096	0.280957	3.5e-05	0.00242	0.095	1.8868	0.00015	This work	0.280825	3.6e-05	-4.74395	1.28133	3273.84	3504.42	Tuno	Charnockite - metatonalite	65.4124	-52.9002	Steenfelt et al., 2020 PR
237	237-4.1	2819.93	7.25589	X	2.33822	0.280949	4.3e-05	0.003	0.1199	1.88657	0.00019	This work	0.280787	4.4e-05	-6.47069	1.56601	3336.51	3595.09	Tuno	Charnockite - metatonalite	65.4124	-52.9002	Steenfelt et al., 2020 PR
237	237-5.1	2823.83	7.95266	D	2.64423	0.280837	4.4e-05	0.001363	0.0516	1.8868	0.00017	This work	0.280763	4.4e-05	-7.21918	1.56603	3345.63	3642.33	Tuno	Charnockite - metatonalite	65.4124	-52.9002	Steenfelt et al., 2020 PR
237	237-6.1	2829.28	10.2186	D	2.6871	0.280913	4.3e-05	0.001781	0.067	1.88692	0.00017	This work	0.280816	4.4e-05	-5.19822	1.56605	3278.9	3527.01	Tuno	Charnockite - metatonalite	65.4124	-52.9002	Steenfelt et al., 2020 PR
237	237-7.1	2814.69	9.85775	X	1.32456	0.280909	4e-05	0.001544	0.0565	1.887	0.00017	This work	0.280826	4e-05	-5.21049	1.42363	3264.08	3516.49	Tuno	Charnockite - metatonalite	65.4124	-52.9002	Steenfelt et al., 2020 PR
237	237-8.1	2817.08	11.9461	X	1.47183	0.280906	3.6e-05	0.00171	0.0649	1.88694	0.00018	This work	0.280814	3.6e-05	-5.58284	1.28127	3282.32	3540.37	Tuno	Charnockite - metatonalite	65.4124	-52.9002	Steenfelt et al., 2020 PR
237	237-9.1	2823.18	13.2	X	-0.440512	0.280922	4e-05	0.00164	0.0625	1.88688	0.00021	This work	0.280833	4e-05	-4.74221	1.42366	3254.63	3495.3	Tuno	Charnockite - metatonalite	65.4124	-52.9002	Steenfelt et al., 2020 PR
237	237-10.1	2815.52	9.19122	X	0.501257	0.280914	3.1e-05	0.000553	0.0178	1.88684	0.00017	This work	0.280884	3.2e-05	-3.11035	1.13891	3175.37	3392.63	Tuno	Charnockite - metatonalite	65.4124	-52.9002	Steenfelt et al., 2020 PR
237	237-11.1	2751.69	17.7502	D	0.201748	0.280982	3.2e-05	0.000764	0.02636	1.88662	0.00012	This work	0.280942	3.2e-05	-2.56208	1.13873	3102.18	3310.73	Tuno	Charnockite - metatonalite	65.4124	-52.9002	Steenfelt et al., 2020 PR
237	237-11.2	2726.18	21.9708	I	1.607	0.280933	2.4e-05	0.0004868	0.01804	1.88692	0.00012	This work	0.280908	2.4e-05	-4.37624	0.854	3145	3398.8	Tuno	Charnockite - metatonalite	65.4124	-52.9002	Steenfelt et al., 2020 PR
237	237-12.1	2956.82	4.2863	X	-1.44936	0.28092	3.9e-05	0.00133	0.049	1.88677	0.00014	This work	0.280845	4e-05	-1.19212	1.42411	3231.19	3388.15	Tuno	Charnockite - metatonalite	65.4124	-52.9002	Steenfelt et al., 2020 PR
237	237-13.1	2816.67	33.6189	X	0.902415	0.280831	4.3e-05	0.00098	0.0355	1.88693	0.00016	This work	0.280778	4.4e-05	-6.85838	1.566	3320.76	3615.5	Tuno	Charnockite - metatonalite	65.4124	-52.9002	Steenfelt et al., 2020 PR
237	237-14.1	2735.62	13.5369	D	2.3372	0.281002	3.2e-05	0.000688	0.02346	1.88695	0.00017	This work	0.280966	3.2e-05	-2.07761	1.13869	3069.63	3269.49	Tuno	Charnockite - metatonalite	65.4124	-52.9002	Steenfelt et al., 2020 PR
237	237-14.2	2975.13	11.501	X	-0.191427	0.280971	4.9e-05	0.002679	0.1014	1.88689	0.00021	This work	0.280818	5e-05	-1.70464	1.78021	3277.08	3432.73	Tuno	Charnockite - metatonalite	65.4124	-52.9002	Steenfelt et al., 2020 PR
237	237-15.1	2799.46	9.02369	X	1.71353	0.280943	2.8e-05	0.000882	0.02939	1.88682	0.00016	This work	0.280896	2.8e-05	-3.07801	0.996505	3163.51	3378.3	Tuno	Charnockite - metatonalite	65.4124	-52.9002	Steenfelt et al., 2020 PR
237	237-16.1	2805.42	9.16653	D	2.61488	0.280895	4e-05	0.0017	0.0646	1.88678	0.00021	This work	0.280804	4e-05	-6.21525	1.4236	3296.4	3568.82	Tuno	Charnockite - metatonalite	65.4124	-52.9002	Steenfelt et al., 2020 PR
237	237-17.1	2816.04	19.2011	X	2.1511	0.280882	4.7e-05	0.000748	0.0273	1.88678	0.00019	This work	0.280842	4.8e-05	-4.61183	1.70836	3233.59	3482.07	Tuno	Charnockite - metatonalite	65.4124	-52.9002	Steenfelt et al., 2020 PR
237	237-18.1	2811.3	11.3623	X	1.12319	0.280923	4.3e-05	0.00252	0.099	1.88677	0.00019	This work	0.280787	4.4e-05	-6.6602	1.56598	3329.78	3599.66	Tuno	Charnockite - metatonalite	65.4124	-52.9002	Steenfelt et al., 2020 PR
237	237-19.1	2786.06	9.1663	X	0.594134	0.28088	2.7e-05	0.0005215	0.01898	1.88691	0.00014	This work	0.280852	2.8e-05	-4.94198	0.996473	3217.65	3478.52	Tuno	Charnockite - metatonalite	65.4124	-52.9002	Steenfelt et al., 2020 PR
237	237-19.2	2788.84	5.59646	D	2.11316	0.280923	3.1e-05	0.0006572	0.02284	1.88667	0.00013	This work	0.280888	3.2e-05	-3.60544	1.13883	3171.88	3401.4	Tuno	Charnockite - metatonalite	65.4124	-52.9002	Steenfelt et al., 2020 PR
483	483_1	2720.36	34.7249	M	-3.80718	0.280959	4.9e-05	2.476e-05	0.001135	1.88661	0.00021	This work	0.280958	5e-05	-2.72916	1.77914	3074.69	3296.45	Tuno	Garnet paragneiss	65.6767	-52.7807	Gardiner et al., 2019 CMP
483	483_2	2730.86	31.1253	M	3.2035	0.280921	3.5e-05	1.24e-05	0.000601	1.88674	0.00013	This work	0.28092	3.6e-05	-3.81178	1.28101	3123.26	3368.9	Tuno	Garnet paragneiss	65.6767	-52.7807	Gardiner et al., 2019 CMP
483	483_3	2734.35	28.5004	D	5.63799	0.280942	3.2e-05	4.015e-05	0.002024	1.88684	0.00014	This work	0.28094	3.2e-05	-3.03441	1.13869	3098.05	3325.41	Tuno	Garnet paragneiss	65.6767	-52.7807	Gardiner et al., 2019 CMP
483	483_4	2737.83	29.3252	M	3.19977	0.280904	2.3e-05	5.48e-05	0.00243	1.88679	0.00012	This work	0.280901	2.4e-05	-4.33239	0.854023	3148.75	3405.18	Tuno	Garnet paragneiss	65.6767	-52.7807	Gardiner et al., 2019 CMP
483	483_5	2737.83	31.9022	D	5.44246	0.280918	3.5e-05	9.42e-05	0.00428	1.88693	0.00012	This work	0.280913	3.6e-05	-3.90774	1.28103	3133.59	3379.97	Tuno	Garnet paragneiss	65.6767	-52.7807	Gardiner et al., 2019 CMP
483	483_6	2738.7	30.1748	D	5.31496	0.280921	3e-05	2.46e-05	0.001215	1.88674	0.00015	This work	0.28092	3e-05	-3.65073	1.06753	3124.22	3365.38	Tuno	Garnet paragneiss	65.6767	-52.7807	Gardiner et al., 2019 CMP
483	483_7	2760.22	54.3598	M	4.72958	0.280953	5.9e-05	9.3e-05	0.00363	1.88695	0.00016	This work	0.280948	6e-05	-2.13533	2.13517	3087.8	3291.95	Tuno	Garnet paragneiss	65.6767	-52.7807	Gardiner et al., 2019 CMP
483	483_8	2736.09	34.5013	M	3.20081	0.280967	3.8e-05	1.451e-05	0.000723	1.88695	0.00013	This work	0.280966	3.8e-05	-2.05619	1.3522	3063.47	3268.58	Tuno	Garnet paragneiss	65.6767	-52.7807	Gardiner et al., 2019 CMP
483	483_9	2724.74	25.1243	D	3.56767	0.280953	3.1e-05	3.06e-05	0.00147	1.88677	0.00013	This work	0.280951	3.2e-05	-2.85056	1.13866	3082.97	3307.06	Tuno	Garnet paragneiss	65.6767	-52.7807	Gardiner et al., 2019 CMP
483	483_10	2736.96	33.6306	D	6.1387	0.28091	2.7e-05	7.1e-05	0.00288	1.8871	0.00017	This work	0.280906	2.8e-05	-4.16947	0.996358	3142.2	3394.84	Tuno	Garnet paragneiss	65.6767	-52.7807	Gardiner et al., 2019 CMP
535	535_1	2794.01	50.1471	M	0.827877	0.280874	4.1e-05	0.00064	0.0222	1.88687	0.00015	This work	0.28084	4.2e-05	-5.19726	1.49474	3235.28	3499.77	Alanngua	Semipelite	64.9671	-52.4128	Gardiner et al., 2019 CMP
535	535_2	2652.87	34.7994	D	2.49567	0.280905	2.9e-05	0.000322	0.0112	1.88695	0.00014	This work	0.280889	3e-05	-6.76931	1.06732	3168.67	3484.31	Alanngua	Semipelite	64.9671	-52.4128	Gardiner et al., 2019 CMP
535	535_3	2567.36	24.3437	M2	1.62946	0.280909	3.5e-05	9.5e-05	0.00388	1.88673	0.00017	This work	0.280904	3.6e-05	-8.21341	1.28052	3145.4	3504.25	Alanngua	Semipelite	64.9671	-52.4128	Gardiner et al., 2019 CMP
535	535_4	2994.53	30.4132	S	1.80143	0.280852	5.8e-05	5.8e-05	0.00281	1.88703	0.00019	This work	0.280849	5.8e-05	-0.154072	2.06514	3216.74	3355.78	Alanngua	Semipelite	64.9671	-52.4128	Gardiner et al., 2019 CMP
535	535_5	2827.83	47.7057	M	3.69609	0.280912	3.9e-05	0.00118	0.0445	1.88692	0.00011	This work	0.280848	4e-05	-4.10657	1.42367	3229.41	3461.22	Alanngua	Semipelite	64.9671	-52.4128	Gardiner et al., 2019 CMP
535	535_6	2858.47	24.9393	P	-4.48187	0.280877	3e-05	0.000983	0.0333	1.88691	9.6e-05	This work	0.280823	3e-05	-4.27213	1.06783	3259.75	3494.68	Alanngua	Semipelite	64.9671	-52.4128	Gardiner et al., 2019 CMP
535	535_7	2923.95	31.2433	S	2.22899	0.280862	3.2e-05	0.001486	0.0532	1.88695	0.00012	This work	0.280779	3.2e-05	-4.31329	1.1392	3322.6	3547.65	Alanngua	Semipelite	64.9671	-52.4128	Gardiner et al., 2019 CMP
535	535_8	2989.01	20.7429	S	-3.45857	0.280854	3.5e-05	0.00163	0.0565	1.88678	0.00013	This work	0.28076	3.6e-05	-3.42527	1.28179	3345.91	3545.37	Alanngua	Semipelite	64.9671	-52.4128	Gardiner et al., 2019 CMP
535	535_9	2869.59	42.065	D	-0.802091	0.280882	3.8e-05	0.00146	0.0506	1.88698	0.00012	This work	0.280802	3.8e-05	-4.77434	1.35262	3293.39	3533	Alanngua	Semipelite	64.9671	-52.4128	Gardiner et al., 2019 CMP
535	535_10	2676.63	38.042	D	2.97443	0.280912	3.8e-05	0.00048	0.0176	1.88694	0.00011	This work	0.280887	3.8e-05	-6.25674	1.35201	3172.13	3472.19	Alanngua	Semipelite	64.9671	-52.4128	Gardiner et al., 2019 CMP
535	535_11	3008.23	29.5461	S	3.06512	0.280912	4e-05	0.001484	0.0536	1.88682	0.0002	This work	0.280826	4e-05	-0.627826	1.42428	3254.94	3394.53	Alanngua	Semipelite	64.9671	-52.4128	Gardiner et al., 2019 CMP
535	535_12	2884.55	36.3664	P	-7.67482	0.28084	3.3e-05	0.00147	0.0504	1.8869	0.00016	This work	0.280759	3.4e-05	-5.95209	1.21028	3350.88	3614.18	Alanngua	Semipelite	64.9671	-52.4128	Gardiner et al., 2019 CMP
535	535_13	2990.61	22.2501	S	-0.569459	0.280911	3.1e-05	0.002843	0.107	1.88686	0.00016	This work	0.280748	3.2e-05	-3.83988	1.13938	3375.56	3571.13	Alanngua	Semipelite	64.9671	-52.4128	Gardiner et al., 2019 CMP
535	535_14	2757.66	57.7898	M	-1.23864	0.280863	3.1e-05	0.00081	0.0288	1.88684	0.00011	This work	0.28082	3.2e-05	-6.74626	1.13875	3263.92	3563.5	Alanngua	Semipelite	64.9671	-52.4128	Gardiner et al., 2019 CMP
535	535_15	2985.08	34.1288	S	9.43547	0.280889	4.5e-05	0.00119	0.0403	1.88685	0.00014	This work	0.280821	4.6e-05	-1.36958	1.63783	3261.07	3420.57	Alanngua	Semipelite	64.9671	-52.4128	Gardiner et al., 2019 CMP
537	537_1	3003.92	23.1738	S	0.563643	0.280846	3.5e-05	0.00115	0.0428	1.88709	0.0002	This work	0.28078	3.6e-05	-2.38922	1.28184	3315.24	3495.58	Akia	Psammite	64.9759	-52.2887	Gardiner et al., 2019 CMP
537	537_2	2999.59	26.7805	S	-6.49839	0.28087	4.7e-05	0.00065	0.0239	1.88678	0.00018	This work	0.280833	4.8e-05	-0.607892	1.7091	3241.39	3386.65	Akia	Psammite	64.9759	-52.2887	Gardiner et al., 2019 CMP
537	537_3	3029.6	23.7117	S	-3.6992	0.28079	4.2e-05	0.000955	0.0314	1.8868	0.00017	This work	0.280734	4.2e-05	-3.3932	1.49557	3373.15	3574.85	Akia	Psammite	64.9759	-52.2887	Gardiner et al., 2019 CMP
537	537_4	2891.59	32.4071	S	-0.859454	0.280832	4.4e-05	0.000584	0.0203	1.88708	0.00022	This work	0.2808	4.4e-05	-4.32903	1.56628	3286.07	3523.61	Akia	Psammite	64.9759	-52.2887	Gardiner et al., 2019 CMP
537	537_5	3041.57	23.6306	S	-0.196312	0.280897	4.9e-05	0.0012	0.0457	1.88682	0.00015	This work	0.280827	5e-05	0.182081	1.78049	3251.19	3372.36	Akia	Psammite	64.9759	-52.2887	Gardiner et al., 2019 CMP
537	537_6	3035.95	30.6394	S	-3.22135	0.280803	9e-05	0.001564	0.0561	1.88689	0.00026	This work	0.280712	9e-05	-4.04921	3.20484	3409.04	3618.53	Akia	Psammite	64.9759	-52.2887	Gardiner et al., 2019 CMP
537	537_7	3011.82	25.2528	S	-4.03536	0.280818	3.7e-05	0.000803	0.0292	1.88688	0.00017	This work	0.280772	3.8e-05	-2.49139	1.35308	3322.99	3507.74	Akia	Psammite	64.9759	-52.2887	Gardiner et al., 2019 CMP
537	537_8	3030.31	23.006	S	-0.661453	0.280841	3.7e-05	0.001481	0.0488	1.88694	0.00016	This work	0.280755	3.8e-05	-2.65115	1.35314	3350.49	3531.51	Akia	Psammite	64.9759	-52.2887	Gardiner et al., 2019 CMP
537	537_9	3021.8	24.4697	S	-2.7447	0.28085	4.2e-05	0.00137	0.0509	1.88701	0.00017	This work	0.28077	4.2e-05	-2.29339	1.49554	3328.76	3503.75	Akia	Psammite	64.9759	-52.2887	Gardiner et al., 2019 CMP
537	537_10	2703.56	32.3294	M	-0.699263	0.2809	5.4e-05	0.000726	0.02467	1.88707	0.00023	This work	0.280862	5.4e-05	-6.51422	1.9214	3207.93	3508.16	Akia	Psammite	64.9759	-52.2887	Gardiner et al., 2019 CMP
537	537_11	2969.67	28.5115	S	-0.624119	0.280794	4.3e-05	0.000939	0.03453	1.88678	0.0002	This work	0.28074	4.4e-05	-4.59328	1.56656	3366.45	3599.5	Akia	Psammite	64.9759	-52.2887	Gardiner et al., 2019 CMP
537	537_12	3048.56	29.1121	S	-0.0191775	0.28083	4.3e-05	0.0004887	0.01681	1.88675	0.00013	This work	0.280801	4.4e-05	-0.560866	1.56686	3280.77	3421.86	Akia	Psammite	64.9759	-52.2887	Gardiner et al., 2019 CMP
537	537_13	3010.38	23.8432	D	-8.58113	0.280865	4e-05	0.00104	0.0389	1.88682	0.00017	This work	0.280805	4e-05	-1.33877	1.42429	3280.53	3438.36	Akia	Psammite	64.9759	-52.2887	Gardiner et al., 2019 CMP
537	537_14	3027.48	25.8317	D	2.18318	0.280771	4.5e-05	0.001004	0.0367	1.88693	0.00025	This work	0.280713	4.6e-05	-4.21996	1.638	3402.66	3622.07	Akia	Psammite	64.9759	-52.2887	Gardiner et al., 2019 CMP
537	537_15	3019.67	26.6021	S	-2.88324	0.280773	4.6e-05	0.00112	0.0418	1.88691	0.00019	This work	0.280708	4.6e-05	-4.56729	1.63796	3410.14	3636.55	Akia	Psammite	64.9759	-52.2887	Gardiner et al., 2019 CMP
566	566_1	3026.77	30.7471	D	11.1036	0.280859	4.2e-05	0.000559	0.0211	1.88699	0.00017	Gardiner et al., 2019	0.280827	4.2e-05	-0.181411	1.49556	3248.4	3382.44	Akia	Metatrondhjemite	65.0812	-51.922	Gardiner et al., 2019 CMP
566	566_2	3022.52	25.1688	I	-1.9814	0.280861	4.7e-05	0.000892	0.03191	1.88682	0.00018	Gardiner et al., 2019	0.280809	4.8e-05	-0.897494	1.70919	3273.43	3421.61	Akia	Metatrondhjemite	65.0812	-51.922	Gardiner et al., 2019 CMP
566	566_3	2987.99	24.7202	D	1.86016	0.2809	3.7e-05	0.001047	0.037	1.88688	0.00017	Gardiner et al., 2019	0.28084	3.8e-05	-0.61941	1.353	3234.4	3378.33	Akia	Metatrondhjemite	65.0812	-51.922	Gardiner et al., 2019 CMP
566	566_4	2988.72	34.7964	I	-1.18698	0.280863	2.9e-05	0.00103	0.0371	1.88687	0.00016	Gardiner et al., 2019	0.280804	3e-05	-1.88542	1.06816	3282.36	3453.97	Akia	Metatrondhjemite	65.0812	-51.922	Gardiner et al., 2019 CMP
566	566_5	3026.06	23.0328	D	3.18958	0.28081	3e-05	0.000552	0.01986	1.88695	0.00014	Gardiner et al., 2019	0.280778	3e-05	-1.92821	1.06825	3312.37	3485.43	Akia	Metatrondhjemite	65.0812	-51.922	Gardiner et al., 2019 CMP
566	566_6	2961.53	38.8572	I	-3.66263	0.280837	3.4e-05	0.000666	0.0228	1.88677	0.00014	Gardiner et al., 2019	0.280799	3.4e-05	-2.69641	1.2105	3286.32	3480.98	Akia	Metatrondhjemite	65.0812	-51.922	Gardiner et al., 2019 CMP
566	566_7	3007.51	43.7315	I	-1.94457	0.280865	4.5e-05	0.0003066	0.0116	1.88695	0.00015	Gardiner et al., 2019	0.280847	4.6e-05	0.103802	1.63792	3219.87	3350.56	Akia	Metatrondhjemite	65.0812	-51.922	Gardiner et al., 2019 CMP
566	566_8	3039.89	20.9262	D	-7.22056	0.28084	3.5e-05	0.000698	0.03	1.88717	0.00015	Gardiner et al., 2019	0.280799	3.6e-05	-0.842158	1.28195	3285.03	3431.8	Akia	Metatrondhjemite	65.0812	-51.922	Gardiner et al., 2019 CMP
566	566_9	3034.54	24.3767	I	-0.1103	0.280874	3.3e-05	0.000588	0.02114	1.88674	0.00015	Gardiner et al., 2019	0.28084	3.4e-05	0.473169	1.21071	3231	3349.62	Akia	Metatrondhjemite	65.0812	-51.922	Gardiner et al., 2019 CMP
566	566_10	3047.17	31.1994	X	-2.18986	0.280837	2.8e-05	0.0005807	0.0206	1.88685	0.00012	Gardiner et al., 2019	0.280803	2.8e-05	-0.535905	0.997087	3279.2	3419.29	Akia	Metatrondhjemite	65.0812	-51.922	Gardiner et al., 2019 CMP
566	566_11	2999.59	32.4976	I	-4.45931	0.280836	4e-05	0.00025	0.00891	1.88684	0.00015	Gardiner et al., 2019	0.280822	4e-05	-0.998133	1.42425	3253.22	3409.8	Akia	Metatrondhjemite	65.0812	-51.922	Gardiner et al., 2019 CMP
566	566_12	3027.48	25.8317	I	-2.99882	0.280858	4.2e-05	0.000715	0.0261	1.88692	0.00015	Gardiner et al., 2019	0.280816	4.2e-05	-0.523583	1.49556	3262.64	3403.28	Akia	Metatrondhjemite	65.0812	-51.922	Gardiner et al., 2019 CMP
566	566_13	2995.25	37.5622	D	-7.51632	0.280875	3.3e-05	0.0003358	0.01275	1.88693	0.00015	Gardiner et al., 2019	0.280856	3.4e-05	0.113054	1.2106	3209.13	3340.49	Akia	Metatrondhjemite	65.0812	-51.922	Gardiner et al., 2019 CMP
566	566_14	3007.51	42.3169	I	-1.41102	0.280805	3.5e-05	0.0003066	0.011624	1.88677	0.00013	Gardiner et al., 2019	0.280787	3.6e-05	-2.03261	1.28185	3298.43	3477.25	Akia	Metatrondhjemite	65.0812	-51.922	Gardiner et al., 2019 CMP
566	566_15	3027.48	24.4282	I	1.29732	0.280822	4.2e-05	0.000922	0.034	1.8869	0.00014	Gardiner et al., 2019	0.280768	4.2e-05	-2.23412	1.49556	3327.79	3504.64	Akia	Metatrondhjemite	65.0812	-51.922	Gardiner et al., 2019 CMP
585	585_1	3013.96	30.8983	D	-3.36849	0.28087	5e-05	0.000418	0.01467	1.88685	0.00016	This work	0.280846	5e-05	0.203211	1.78037	3222.37	3349.66	Akia	Metanorite	65.0781	-51.6131	Waterton et al., 2020 FiES
585	585_2	2955.59	39.6955	I	-1.8843	0.28088	3.2e-05	0.000485	0.0168	1.88689	0.00018	This work	0.280852	3.2e-05	-0.937471	1.13928	3214.68	3372.08	Akia	Metanorite	65.0781	-51.6131	Waterton et al., 2020 FiES
585	585_3	2997.42	30.3799	I	0.74095	0.280821	3.4e-05	0.000393	0.01414	1.88692	0.00014	This work	0.280798	3.4e-05	-1.87612	1.21061	3284.64	3460.16	Akia	Metanorite	65.0781	-51.6131	Waterton et al., 2020 FiES
585	585_4	3008.95	33.0858	D	-2.95848	0.280839	2.9e-05	0.000374	0.01291	1.88697	0.00018	This work	0.280817	3e-05	-0.927051	1.06821	3259.47	3412.84	Akia	Metanorite	65.0781	-51.6131	Waterton et al., 2020 FiES
585	585_5	2980.69	33.4676	I	0.798007	0.280875	4e-05	0.00115	0.0422	1.88703	0.00014	This work	0.280809	4e-05	-1.8864	1.42419	3276.45	3447.81	Akia	Metanorite	65.0781	-51.6131	Waterton et al., 2020 FiES
585	585_6	3016.11	27.3406	I	1.43658	0.280826	3e-05	0.000662	0.0253	1.88696	0.00012	This work	0.280788	3e-05	-1.81679	1.06823	3300.51	3471.12	Akia	Metanorite	65.0781	-51.6131	Waterton et al., 2020 FiES
585	585_7	3014.68	35.127	D	14.5845	0.280857	3.9e-05	0.000487	0.01793	1.88677	0.00012	This work	0.280829	4e-05	-0.38526	1.4243	3245.11	3385.14	Akia	Metanorite	65.0781	-51.6131	Waterton et al., 2020 FiES
585	585_8	2992.35	41.9045	I	2.27678	0.280856	3.6e-05	0.000497	0.01747	1.88709	0.00017	This work	0.280827	3.6e-05	-0.961062	1.2818	3247.25	3401.98	Akia	Metanorite	65.0781	-51.6131	Waterton et al., 2020 FiES
585	585_9	2997.42	38.9534	I	2.30553	0.280829	3.2e-05	0.0003017	0.0106	1.88701	0.00014	This work	0.280812	3.2e-05	-1.40416	1.13939	3266.62	3432.19	Akia	Metanorite	65.0781	-51.6131	Waterton et al., 2020 FiES
585	585_10	2996.7	33.2504	D	4.06489	0.28086	5.1e-05	0.00145	0.0541	1.88701	0.00018	This work	0.280777	5.2e-05	-2.67004	1.85151	3322.19	3506.62	Akia	Metanorite	65.0781	-51.6131	Waterton et al., 2020 FiES
585	585_11	3016.82	30.1587	D	6.82183	0.280855	4.2e-05	0.00098	0.0376	1.88679	0.00013	This work	0.280798	4.2e-05	-1.42372	1.49552	3288.81	3448.38	Akia	Metanorite	65.0781	-51.6131	Waterton et al., 2020 FiES
585	585_12	3001.76	44.5617	I	-1.28413	0.280865	3.3e-05	0.000505	0.0178	1.88703	0.00014	This work	0.280836	3.4e-05	-0.43817	1.21062	3236.06	3378.26	Akia	Metanorite	65.0781	-51.6131	Waterton et al., 2020 FiES
585	585_13	3019.67	28.0123	D	5.62997	0.280881	3.2e-05	0.000525	0.01921	1.88705	0.00013	This work	0.280851	3.2e-05	0.507125	1.13945	3216.62	3336.05	Akia	Metanorite	65.0781	-51.6131	Waterton et al., 2020 FiES
585	585_14	3018.96	31.5437	D	15.107	0.28086	3.5e-05	0.000493	0.0179	1.88696	0.00016	This work	0.280831	3.6e-05	-0.19114	1.28188	3241.66	3376.95	Akia	Metanorite	65.0781	-51.6131	Waterton et al., 2020 FiES
585	585_15	3007.51	38.069	I	2.63328	0.280847	3.5e-05	0.000664	0.0235	1.88681	0.00015	This work	0.280809	3.6e-05	-1.27213	1.28185	3272.94	3432.18	Akia	Metanorite	65.0781	-51.6131	Waterton et al., 2020 FiES
571	571_1	3004.64	26.7355	D	2.5401	0.280836	3e-05	0.0005901	0.02014	1.88697	0.00013	This work	0.280802	3e-05	-1.57856	1.0682	3281.3	3448.12	Akia	Amphibolite	65.1362	-51.9017	Olierook et al., 2021 SD
571	571_2	2874.34	48.9597	D	0.268093	0.281039	9.9e-05	0.000658	0.01811	1.887	0.00028	This work	0.281003	0.0001	2.49481	3.55957	3018.2	3104.7	Akia	Amphibolite	65.1362	-51.9017	Olierook et al., 2021 SD
571	571_3	3001.76	28.1894	I	0.532578	0.280846	4.1e-05	0.000471	0.01591	1.88695	0.00016	This work	0.280819	4.2e-05	-1.04491	1.49547	3258.26	3414.25	Akia	Amphibolite	65.1362	-51.9017	Olierook et al., 2021 SD
571	571_4	3008.95	29.5383	I	0.420092	0.280884	3.9e-05	0.0003325	0.01081	1.88704	0.00017	This work	0.280865	4e-05	0.760653	1.42428	3197.06	3312.66	Akia	Amphibolite	65.1362	-51.9017	Olierook et al., 2021 SD
571	571_5	2973.35	29.9305	D	5.24956	0.280882	4.2e-05	0.0004056	0.01367	1.8869	0.00016	This work	0.280859	4.2e-05	-0.291575	1.49537	3205.6	3347.51	Akia	Amphibolite	65.1362	-51.9017	Olierook et al., 2021 SD
571	571_6	3001.76	28.9032	I	0.708323	0.280864	4.4e-05	0.0003897	0.012942	1.88679	0.00014	This work	0.280842	4.4e-05	-0.237127	1.56668	3227.95	3366.33	Akia	Amphibolite	65.1362	-51.9017	Olierook et al., 2021 SD
571	571_7	3003.2	43.8216	I	-2.58409	0.280901	4.5e-05	0.000523	0.0175	1.887	0.00015	This work	0.280871	4.6e-05	0.840242	1.6379	3190.09	3303.46	Akia	Amphibolite	65.1362	-51.9017	Olierook et al., 2021 SD
571	571_8	3039.47	29.9038	D	9.50009	0.28088	3.7e-05	0.000593	0.01958	1.88692	0.00012	This work	0.280845	3.8e-05	0.790789	1.35316	3223.5	3334.59	Akia	Amphibolite	65.1362	-51.9017	Olierook et al., 2021 SD
571	571_9	2986.53	34.8283	D	7.34739	0.28093	4.8e-05	0.0003694	0.01199	1.88698	0.00019	This work	0.280909	4.8e-05	1.79886	1.70905	3139.61	3233.5	Akia	Amphibolite	65.1362	-51.9017	Olierook et al., 2021 SD
571	571_10	2966.72	28.5415	D	-2.26339	0.280832	5.1e-05	0.0003581	0.01134	1.8871	0.00014	This work	0.280812	5.2e-05	-2.13022	1.85138	3267.33	3451.44	Akia	Amphibolite	65.1362	-51.9017	Olierook et al., 2021 SD
571	571_11	2982.89	31.993	D	6.36352	0.28087	4.4e-05	0.000382	0.01214	1.88692	0.00019	This work	0.280848	4.4e-05	-0.448368	1.56661	3219.44	3364.22	Akia	Amphibolite	65.1362	-51.9017	Olierook et al., 2021 SD
571	571_12	3025.35	29.3605	D	3.58662	0.280855	3.1e-05	0.000513	0.01697	1.88693	0.0001	This work	0.280825	3.2e-05	-0.261609	1.13947	3249.88	3386.09	Akia	Amphibolite	65.1362	-51.9017	Olierook et al., 2021 SD
571	571_13	2994.53	29.6961	D	2.42986	0.280892	3.4e-05	0.000336	0.01089	1.88688	0.00015	This work	0.280873	3.4e-05	0.701	1.2106	3186.85	3305	Akia	Amphibolite	65.1362	-51.9017	Olierook et al., 2021 SD
571	571_14	3030.31	30.0064	I	2.19389	0.280891	2.7e-05	0.0003389	0.01105	1.88687	0.00017	This work	0.280871	2.8e-05	1.4965	0.997047	3188.39	3285.54	Akia	Amphibolite	65.1362	-51.9017	Olierook et al., 2021 SD
571	571_15	3006.8	28.8507	I	1.78128	0.280892	3.6e-05	0.000448	0.01485	1.88691	0.00015	This work	0.280866	3.6e-05	0.757648	1.28185	3195.88	3311.16	Akia	Amphibolite	65.1362	-51.9017	Olierook et al., 2021 SD
587	587_1	2986.1	22.493	D	10.6049	0.280876	4.3e-05	0.001484	0.0542	1.88707	0.00012	This work	0.280791	4.4e-05	-2.40935	1.56662	3303.54	3482.98	Akia	Garnet amphibolite	65.0329	-51.5255	Olierook et al., 2021 SD
587	587_2	3013.25	33.0283	I	0.387467	0.28088	4e-05	0.000497	0.0179	1.88695	0.00013	This work	0.280851	4e-05	0.379811	1.4243	3215.65	3338.62	Akia	Garnet amphibolite	65.0329	-51.5255	Olierook et al., 2021 SD
587	587_3	2982.89	34.1597	I	-0.191949	0.281061	4.4e-05	0.002439	0.0737	1.88679	0.00018	This work	0.280921	4.4e-05	2.15772	1.56661	3131.19	3209.3	Akia	Garnet amphibolite	65.0329	-51.5255	Olierook et al., 2021 SD
587	587_4	3003.2	43.8216	D	5.13997	0.280832	3.5e-05	0.000478	0.01691	1.8868	0.00014	This work	0.280804	3.6e-05	-1.5242	1.28184	3277.25	3443.78	Akia	Garnet amphibolite	65.0329	-51.5255	Olierook et al., 2021 SD
587	587_5	3009.67	52.8502	D	4.20414	0.280961	4.7e-05	0.001237	0.037	1.88695	0.00018	This work	0.28089	4.8e-05	1.65766	1.70914	3168.35	3259.9	Akia	Garnet amphibolite	65.0329	-51.5255	Olierook et al., 2021 SD
587	587_6	2956.33	44.084	D	0.518822	0.280868	3.1e-05	0.000668	0.02331	1.88694	0.00016	This work	0.28083	3.2e-05	-1.7171	1.13928	3245.52	3418.91	Akia	Garnet amphibolite	65.0329	-51.5255	Olierook et al., 2021 SD
587	587_7	2971.88	39.4041	D	0.545064	0.281034	4.5e-05	0.0012	0.0347	1.88677	0.00013	This work	0.280966	4.6e-05	3.47221	1.63778	3067.21	3122.41	Akia	Garnet amphibolite	65.0329	-51.5255	Olierook et al., 2021 SD
587	587_8	2821.54	23.2733	D	44.6191	0.280951	3.1e-05	0.00399	0.1416	1.88705	0.00015	This work	0.280735	3.2e-05	-8.27095	1.13892	3425.54	3702.67	Akia	Garnet amphibolite	65.0329	-51.5255	Olierook et al., 2021 SD
587	587_9	3005.36	32.423	D	6.68851	0.280874	4.6e-05	0.000456	0.0164	1.88695	0.00013	This work	0.280848	4.6e-05	0.0667702	1.63791	3220.21	3351.08	Akia	Garnet amphibolite	65.0329	-51.5255	Olierook et al., 2021 SD
587	587_10	2968.19	40.9257	I	2.14474	0.28102	3.7e-05	0.001842	0.05496	1.88691	0.00018	This work	0.280915	3.8e-05	1.58736	1.35294	3138.11	3231.81	Akia	Garnet amphibolite	65.0329	-51.5255	Olierook et al., 2021 SD
587	587_11	2976.29	50.8864	I	2.53526	0.280995	3.5e-05	0.001247	0.03677	1.88718	0.00015	This work	0.280924	3.6e-05	2.0885	1.28175	3123.44	3208.29	Akia	Garnet amphibolite	65.0329	-51.5255	Olierook et al., 2021 SD
587	587_12	2990.17	31.1825	D	5.2401	0.280843	3.3e-05	0.000474	0.0167	1.88694	0.00017	This work	0.280816	3.4e-05	-1.42762	1.21059	3262.46	3427.96	Akia	Garnet amphibolite	65.0329	-51.5255	Olierook et al., 2021 SD
587	587_13	2956.33	42.6175	D	-0.666263	0.281026	3.5e-05	0.001212	0.0362	1.88674	0.00017	This work	0.280957	3.6e-05	2.80906	1.28169	3078.92	3149.82	Akia	Garnet amphibolite	65.0329	-51.5255	Olierook et al., 2021 SD
587	587_14	2987.26	40.5684	D	5.56532	0.281049	4.4e-05	0.00179	0.0541	1.88697	0.00017	This work	0.280946	4.4e-05	3.15175	1.56663	3094.22	3153.5	Akia	Garnet amphibolite	65.0329	-51.5255	Olierook et al., 2021 SD
587	587_15	2961.53	41.7826	D	4.74488	0.28101	4.1e-05	0.001043	0.032	1.88709	0.00019	This work	0.280951	4.2e-05	2.69987	1.49533	3086.96	3160.38	Akia	Garnet amphibolite	65.0329	-51.5255	Olierook et al., 2021 SD
582	582_1	3024.65	32.8767	I	1.87619	0.280856	4.3e-05	0.000757	0.027	1.88681	0.00016	This work	0.280812	4.4e-05	-0.747264	1.56677	3268.78	3414.35	Akia	Metatonalitic gneiss	65.4349	-51.4549	Steenfelt et al., 2020 PR
582	582_2	2993.8	31.8559	D	1.3278	0.2809	3.6e-05	0.000797	0.0291	1.8869	0.00019	This work	0.280854	3.6e-05	0.0253041	1.28181	3213.75	3344.57	Akia	Metatonalitic gneiss	65.4349	-51.4549	Steenfelt et al., 2020 PR
582	582_3	3025.35	32.8673	I	0.184996	0.280849	4.5e-05	0.000807	0.02916	1.88694	0.00019	This work	0.280802	4.6e-05	-1.0836	1.63799	3282.23	3434.84	Akia	Metatonalitic gneiss	65.4349	-51.4549	Steenfelt et al., 2020 PR
582	582_4	3007.51	35.9426	I	-1.73129	0.280866	4.1e-05	0.000599	0.0204	1.887	0.00016	This work	0.280831	4.2e-05	-0.461922	1.49549	3242.47	3384.13	Akia	Metatonalitic gneiss	65.4349	-51.4549	Steenfelt et al., 2020 PR
582	582_5	3023.23	35.702	I	-0.218702	0.280831	5.6e-05	0.00034	0.01145	1.88687	0.00016	This work	0.280811	5.6e-05	-0.80805	1.99406	3267.15	3416.85	Akia	Metatonalitic gneiss	65.4349	-51.4549	Steenfelt et al., 2020 PR
582	582_6	3016.11	32.9902	I	-0.268178	0.280861	4e-05	0.000749	0.02692	1.88679	0.00015	This work	0.280818	4e-05	-0.749975	1.42431	3261.49	3407.89	Akia	Metatonalitic gneiss	65.4349	-51.4549	Steenfelt et al., 2020 PR
582	582_7	3017.53	27.3272	I	1.60447	0.280807	3.4e-05	0.000649	0.0226	1.88699	0.00018	This work	0.280769	3.4e-05	-2.43347	1.21066	3324.49	3508.74	Akia	Metatonalitic gneiss	65.4349	-51.4549	Steenfelt et al., 2020 PR
582	582_8	3021.09	30.1103	I	-1.97647	0.280861	3.6e-05	0.00079	0.0279	1.88691	0.00012	This work	0.280815	3.6e-05	-0.719454	1.28189	3264.9	3409.95	Akia	Metatonalitic gneiss	65.4349	-51.4549	Steenfelt et al., 2020 PR
582	582_9	3008.95	30.9578	D	-4.12126	0.280837	3.7e-05	0.000583	0.0209	1.88688	0.00012	This work	0.280803	3.8e-05	-1.42829	1.35307	3279.39	3442.55	Akia	Metatonalitic gneiss	65.4349	-51.4549	Steenfelt et al., 2020 PR
582	582_10	3010.38	34.4829	D	0.0239936	0.280909	5.7e-05	0.000927	0.0331	1.88704	0.00022	This work	0.280855	5.8e-05	0.460565	2.06521	3212.47	3331.6	Akia	Metatonalitic gneiss	65.4349	-51.4549	Steenfelt et al., 2020 PR
582	582_11	3025.35	32.8673	I	-1.14465	0.280868	3.3e-05	0.000871	0.0311	1.88697	0.0002	This work	0.280817	3.4e-05	-0.539463	1.21069	3262.37	3402.58	Akia	Metatonalitic gneiss	65.4349	-51.4549	Steenfelt et al., 2020 PR
582	582_12	3002.48	28.8957	I	-0.185372	0.280901	3.7e-05	0.000956	0.0343	1.88688	0.00017	This work	0.280846	3.8e-05	-0.0654525	1.35305	3225.52	3356.69	Akia	Metatonalitic gneiss	65.4349	-51.4549	Steenfelt et al., 2020 PR
582	582_13	3001.76	28.1894	D	3.52645	0.280895	4e-05	0.000813	0.02945	1.88678	0.00016	This work	0.280848	4e-05	-0.0021345	1.42426	3221.7	3352.38	Akia	Metatonalitic gneiss	65.4349	-51.4549	Steenfelt et al., 2020 PR
582	582_14	3023.94	29.3758	I	-0.0752595	0.28086	3.9e-05	0.001016	0.0361	1.88695	0.00017	This work	0.280801	4e-05	-1.15688	1.42433	3285.18	3438.08	Akia	Metatonalitic gneiss	65.4349	-51.4549	Steenfelt et al., 2020 PR
582	582_15	3018.25	34.3702	D	3.25088	0.280819	4.1e-05	0.00035	0.01197	1.88689	0.00017	This work	0.280799	4.2e-05	-1.37248	1.49553	3283.7	3446.45	Akia	Metatonalitic gneiss	65.4349	-51.4549	Steenfelt et al., 2020 PR
575	575_1	3001.76	27.4754	D	2.3648	0.280865	4.9e-05	0.0009181	0.03038	1.88691	0.00015	Gardiner et al., 2019	0.280812	5e-05	-1.28604	1.78032	3270.29	3428.55	Akia	Leucogranitic orthogneiss	65.3296	-51.7844	Gardiner et al., 2019 CMP
575	575_2	2965.24	27.0912	D	21.9379	0.280898	3.2e-05	0.00259	0.0956	1.88689	0.00016	Gardiner et al., 2019	0.280751	3.2e-05	-4.33814	1.13931	3370.76	3580.99	Akia	Leucogranitic orthogneiss	65.3296	-51.7844	Gardiner et al., 2019 CMP
575	575_3	2989.45	26.151	D	2.0448	0.280881	3.8e-05	0.001435	0.0474	1.88696	0.00012	Gardiner et al., 2019	0.280799	3.8e-05	-2.05558	1.353	3292.6	3464.62	Akia	Leucogranitic orthogneiss	65.3296	-51.7844	Gardiner et al., 2019 CMP
575	575_4	3007.51	25.9984	D	5.01445	0.280938	4.4e-05	0.001062	0.03506	1.88692	0.00015	Gardiner et al., 2019	0.280877	4.4e-05	1.1496	1.5667	3184.85	3288.43	Akia	Leucogranitic orthogneiss	65.3296	-51.7844	Gardiner et al., 2019 CMP
575	575_5	3006.08	24.5856	I	-1.28574	0.280855	3.4e-05	0.000851	0.02759	1.88683	0.00018	Gardiner et al., 2019	0.280806	3.4e-05	-1.40493	1.21063	3277.96	3438.94	Akia	Leucogranitic orthogneiss	65.3296	-51.7844	Gardiner et al., 2019 CMP
575	575_6	3035.25	28.5572	I	0.0455502	0.280881	2.7e-05	0.002345	0.08587	1.88705	0.00012	Gardiner et al., 2019	0.280744	2.8e-05	-2.90905	0.997059	3372.25	3550.59	Akia	Leucogranitic orthogneiss	65.3296	-51.7844	Gardiner et al., 2019 CMP
575	575_7	3058.99	29.0017	D	6.11278	0.280884	3.5e-05	0.003275	0.1238	1.88691	0.00013	Gardiner et al., 2019	0.280692	3.6e-05	-4.22665	1.282	3453.51	3646.8	Akia	Leucogranitic orthogneiss	65.3296	-51.7844	Gardiner et al., 2019 CMP
575	575_8	3009.67	36.6174	D	-11.8842	0.280866	3.8e-05	0.0002465	0.00849	1.88684	0.00013	Gardiner et al., 2019	0.280852	3.8e-05	0.313499	1.35307	3213.69	3339.78	Akia	Leucogranitic orthogneiss	65.3296	-51.7844	Gardiner et al., 2019 CMP
575	575_9	3011.1	25.9683	D	2.39614	0.280817	4.3e-05	0.0010983	0.03603	1.88702	0.00015	Gardiner et al., 2019	0.280753	4.4e-05	-3.15155	1.56672	3349.55	3546.26	Akia	Leucogranitic orthogneiss	65.3296	-51.7844	Gardiner et al., 2019 CMP
575	575_10	3016.11	32.2846	D	9.3858	0.280918	4e-05	0.00218	0.076	1.887	0.00016	Gardiner et al., 2019	0.280792	4e-05	-1.67195	1.42431	3306.67	3462.54	Akia	Leucogranitic orthogneiss	65.3296	-51.7844	Gardiner et al., 2019 CMP
575	575_11	3038.76	27.1302	D	17.3778	0.280953	4.5e-05	0.003029	0.1147	1.88672	0.00014	Gardiner et al., 2019	0.280776	4.6e-05	-1.68967	1.63804	3333.5	3481.14	Akia	Leucogranitic orthogneiss	65.3296	-51.7844	Gardiner et al., 2019 CMP
575	575_12	3003.92	30.3055	I	0.212854	0.280867	4.7e-05	0.00121	0.044	1.88698	0.00015	Gardiner et al., 2019	0.280797	4.8e-05	-1.76472	1.70912	3292.24	3458.59	Akia	Leucogranitic orthogneiss	65.3296	-51.7844	Gardiner et al., 2019 CMP
575	575_13	2963.53	22.7744	D	18.5766	0.280883	3.6e-05	0.0015	0.0556	1.8869	0.00014	Gardiner et al., 2019	0.280798	3.6e-05	-2.70156	1.28172	3295.46	3482.83	Akia	Leucogranitic orthogneiss	65.3296	-51.7844	Gardiner et al., 2019 CMP
575	575_14	3038.76	29.9116	D	11.734	0.280886	3.3e-05	0.00152	0.0567	1.88691	0.00017	Gardiner et al., 2019	0.280797	3.4e-05	-0.938792	1.21072	3293.12	3436.66	Akia	Leucogranitic orthogneiss	65.3296	-51.7844	Gardiner et al., 2019 CMP
575	575_15	3182.23	53.3886	D	-24.183	0.280909	3.3e-05	0.001824	0.0612	1.88687	0.00013	Gardiner et al., 2019	0.280797	3.4e-05	2.4612	1.21114	3288.05	3346.55	Akia	Leucogranitic orthogneiss	65.3296	-51.7844	Gardiner et al., 2019 CMP
567	567_1	2996.7	35.3951	D	3.81717	0.280842	3.1e-05	0.000781	0.0276	1.88689	0.00014	This work	0.280797	3.2e-05	-1.94024	1.13939	3289.33	3463.4	Akia	Felsic rock brecciating norite	65.0812	-51.9224	Steenfelt et al., 2020 PR
567	567_2	2956.33	41.8839	D	4.23963	0.280882	4.7e-05	0.000601	0.0219	1.88675	0.00015	This work	0.280848	4.8e-05	-1.0833	1.70893	3221.51	3381.31	Akia	Felsic rock brecciating norite	65.0812	-51.9224	Steenfelt et al., 2020 PR
567	567_3	2997.42	39.6667	D	4.3636	0.280855	3.9e-05	0.00041733	0.014694	1.88678	0.00014	This work	0.280831	4e-05	-0.715373	1.42424	3242.02	3391.34	Akia	Felsic rock brecciating norite	65.0812	-51.9224	Steenfelt et al., 2020 PR
567	567_4	2995.98	45.3983	D	5.84002	0.280838	3.6e-05	0.000618	0.0226	1.8869	0.00016	This work	0.280802	3.6e-05	-1.76548	1.28181	3280.99	3452.49	Akia	Felsic rock brecciating norite	65.0812	-51.9224	Steenfelt et al., 2020 PR
567	567_5	3033.84	48.0421	D	7.97746	0.280862	4.4e-05	0.000574	0.0206	1.88676	0.00013	This work	0.280829	4.4e-05	0.0585441	1.5668	3245.68	3373.68	Akia	Felsic rock brecciating norite	65.0812	-51.9224	Steenfelt et al., 2020 PR
567	567_6	2989.45	46.9735	D	3.29436	0.280828	4.1e-05	0.0003138	0.01066	1.88704	0.00018	This work	0.28081	4.2e-05	-1.65122	1.49543	3268.92	3440.65	Akia	Felsic rock brecciating norite	65.0812	-51.9224	Steenfelt et al., 2020 PR
567	567_7	2992.35	46.9064	I	1.03489	0.280897	4.1e-05	0.000652	0.0227	1.88697	0.0002	This work	0.28086	4.2e-05	0.18167	1.49544	3205.86	3334.16	Akia	Felsic rock brecciating norite	65.0812	-51.9224	Steenfelt et al., 2020 PR
567	567_8	2968.19	43.8353	I	1.06784	0.280836	3.3e-05	0.0003133	0.01081	1.8868	0.00019	This work	0.280818	3.4e-05	-1.86242	1.21052	3258.41	3436.71	Akia	Felsic rock brecciating norite	65.0812	-51.9224	Steenfelt et al., 2020 PR
567	567_9	3003.92	49.472	D	5.07996	0.280852	3.6e-05	0.000357	0.01239	1.887	0.00013	This work	0.280831	3.6e-05	-0.54677	1.28184	3241.02	3386.38	Akia	Felsic rock brecciating norite	65.0812	-51.9224	Steenfelt et al., 2020 PR
567	567_10	2930.03	46.8815	I	2.10738	0.280831	4e-05	0.000538	0.01863	1.88711	0.00016	This work	0.280801	4e-05	-3.38223	1.42402	3283.55	3497.24	Akia	Felsic rock brecciating norite	65.0812	-51.9224	Steenfelt et al., 2020 PR
567	567_11	2981.42	39.2349	D	3.25513	0.280864	3e-05	0.000688	0.02417	1.88696	0.00014	This work	0.280825	3e-05	-1.31978	1.06814	3252.46	3414.79	Akia	Felsic rock brecciating norite	65.0812	-51.9224	Steenfelt et al., 2020 PR
567	567_12	3011.82	37.9964	D	4.86175	0.280873	4e-05	0.0007772	0.0287	1.88697	0.00016	This work	0.280828	4e-05	-0.479853	1.42429	3247.93	3388.54	Akia	Felsic rock brecciating norite	65.0812	-51.9224	Steenfelt et al., 2020 PR
567	567_13	3026.06	55.1875	D	4.58704	0.280837	3.3e-05	0.000361	0.0126	1.88705	0.00015	This work	0.280816	3.4e-05	-0.571471	1.21069	3261.02	3405.02	Akia	Felsic rock brecciating norite	65.0812	-51.9224	Steenfelt et al., 2020 PR
567	567_14	2965.98	47.52	D	3.76797	0.280859	3.6e-05	0.000557	0.0197	1.88683	0.00013	This work	0.280827	3.6e-05	-1.58939	1.28172	3248.24	3418.81	Akia	Felsic rock brecciating norite	65.0812	-51.9224	Steenfelt et al., 2020 PR
567	567_15	2981.42	44.2803	I	2.79948	0.280877	4e-05	0.0004281	0.01492	1.88686	0.00016	This work	0.280852	4e-05	-0.327225	1.42419	3213.99	3355.89	Akia	Felsic rock brecciating norite	65.0812	-51.9224	Steenfelt et al., 2020 PR
488	488_1	2731.74	38.0066	I	3.50076	0.280871	4e-05	0.000584	0.01527	1.88703	0.00018	This work	0.28084	4e-05	-6.63476	1.42335	3234.63	3536.97	Alanngua	Metaleucogabbro	65.5118	-52.5607	Gardiner et al., 2019 CMP
488	488_2	2692.85	45.7221	D	-0.597173	0.280841	4.5e-05	0.000262	0.0079	1.88693	0.00019	This work	0.280827	4.6e-05	-8.00808	1.6367	3247.66	3588.36	Alanngua	Metaleucogabbro	65.5118	-52.5607	Gardiner et al., 2019 CMP
488	488_3	2755.94	46.8999	I	3.35594	0.280833	3.1e-05	0.0002	0.00579	1.88698	0.0002	This work	0.280822	3.2e-05	-6.70696	1.13875	3253.04	3559.85	Alanngua	Metaleucogabbro	65.5118	-52.5607	Gardiner et al., 2019 CMP
488	488_4	2794.01	50.1471	X	1.70019	0.280855	4e-05	0.000276	0.00882	1.88678	0.00015	This work	0.28084	4e-05	-5.17976	1.42356	3230.48	3498.74	Alanngua	Metaleucogabbro	65.5118	-52.5607	Gardiner et al., 2019 CMP
488	488_5	2701.78	39.3863	I	3.24057	0.280923	5.2e-05	0.0002902	0.00839	1.88716	0.00021	This work	0.280908	5.2e-05	-4.93446	1.85023	3142.52	3413.12	Alanngua	Metaleucogabbro	65.5118	-52.5607	Gardiner et al., 2019 CMP
488	488_6	2991.63	32.6012	X	1.35141	0.280838	3.7e-05	0.0012188	0.03499	1.88707	0.00016	This work	0.280768	3.8e-05	-3.09514	1.35301	3331.84	3527.86	Alanngua	Metaleucogabbro	65.5118	-52.5607	Gardiner et al., 2019 CMP
488	488_7	2974.09	28.4668	X	0.23553	0.280866	3.7e-05	0.000544	0.01614	1.88696	0.00022	This work	0.280835	3.8e-05	-1.12544	1.35296	3237.94	3397.57	Alanngua	Metaleucogabbro	65.5118	-52.5607	Gardiner et al., 2019 CMP
488	488_8	3000.31	28.9183	X	0.525315	0.280921	5.1e-05	0.00088	0.022657	1.88699	0.00025	This work	0.28087	5.2e-05	0.752923	1.85153	3192.63	3306.41	Alanngua	Metaleucogabbro	65.5118	-52.5607	Gardiner et al., 2019 CMP
488	488_9	2946.62	36.8988	X	-0.611698	0.280877	4.2e-05	0.000655	0.01822	1.88698	0.00017	This work	0.28084	4.2e-05	-1.59512	1.49528	3232.55	3404.15	Alanngua	Metaleucogabbro	65.5118	-52.5607	Gardiner et al., 2019 CMP
488	488_10	2938.35	39.2635	X	0.647997	0.280865	4.3e-05	0.000611	0.0182	1.88708	0.00019	This work	0.280831	4.4e-05	-2.1253	1.56645	3244.78	3429.19	Alanngua	Metaleucogabbro	65.5118	-52.5607	Gardiner et al., 2019 CMP
488	488_11	2775.53	37.2909	X	0.681843	0.280843	4.6e-05	0.000346	0.00987	1.8869	0.00018	This work	0.280825	4.6e-05	-6.17014	1.63702	3251.92	3543.15	Alanngua	Metaleucogabbro	65.5118	-52.5607	Gardiner et al., 2019 CMP
488	488_12	3004.64	38.8275	X	0.587463	0.280866	4.5e-05	0.0006826	0.01854	1.88681	0.00018	This work	0.280827	4.6e-05	-0.700399	1.63791	3249.37	3396.05	Alanngua	Metaleucogabbro	65.5118	-52.5607	Gardiner et al., 2019 CMP
488	488_13	3023.94	34.9901	X	-1.2717	0.280859	5.1e-05	0.000616	0.0186	1.88693	0.00023	This work	0.280823	5.2e-05	-0.365221	1.85163	3253.11	3391.14	Alanngua	Metaleucogabbro	65.5118	-52.5607	Gardiner et al., 2019 CMP
488	488_14	2715.95	40.0088	I	-3.54616	0.280822	4.4e-05	0.000589	0.01748	1.88691	0.00017	This work	0.280791	4.4e-05	-8.75151	1.56563	3299.67	3650.04	Alanngua	Metaleucogabbro	65.5118	-52.5607	Gardiner et al., 2019 CMP
488	488_15	2729.12	40.6348	I	2.68743	0.28082	3.3e-05	0.0005201	0.01617	1.88695	0.00015	This work	0.280793	3.4e-05	-8.39105	1.20984	3296.54	3638.84	Alanngua	Metaleucogabbro	65.5118	-52.5607	Gardiner et al., 2019 CMP
318	318_1	2739.82	21.3982	D	-4.92974	0.280943	4.4e-05	0.0001069	0.00496	1.88687	0.00016	Gardiner et al., 2019	0.280937	4.4e-05	-2.99511	1.56572	3101.94	3327.3	Alanngua	Pegmatite	65.2962	-52.4528	Gardiner et al., 2019 CMP
318	318_2	2772.14	30.6451	M	-3.22956	0.280911	3e-05	0.000114	0.005	1.88694	0.00018	Gardiner et al., 2019	0.280905	3e-05	-3.3904	1.06761	3144.29	3375.74	Alanngua	Pegmatite	65.2962	-52.4528	Gardiner et al., 2019 CMP
318	318_3	2755.94	30.832	D	-4.61519	0.280918	3.6e-05	0.0002412	0.01045	1.88688	0.00013	Gardiner et al., 2019	0.280905	3.6e-05	-3.75958	1.28109	3145.19	3385.16	Alanngua	Pegmatite	65.2962	-52.4528	Gardiner et al., 2019 CMP
318	318_4	2722.2	25.0566	D	14.572	0.280919	3.8e-05	9.23e-05	0.003891	1.88712	0.00012	Gardiner et al., 2019	0.280914	3.8e-05	-4.23451	1.35215	3132.14	3387.32	Alanngua	Pegmatite	65.2962	-52.4528	Gardiner et al., 2019 CMP
318	318_5	2743.03	24.9861	M	0.364808	0.280919	4.2e-05	0.000142	0.007	1.88711	0.00018	Gardiner et al., 2019	0.280912	4.2e-05	-3.83975	1.49456	3136.05	3379.95	Alanngua	Pegmatite	65.2962	-52.4528	Gardiner et al., 2019 CMP
318	318_6	2708.88	22.8732	D	-6.37177	0.280886	3.7e-05	0.00011	0.00485	1.88674	0.00012	Gardiner et al., 2019	0.28088	3.8e-05	-5.75308	1.35211	3176.6	3467.15	Alanngua	Pegmatite	65.2962	-52.4528	Gardiner et al., 2019 CMP
318	318_7	2723.87	25.9999	M	1.26473	0.280902	3.8e-05	5.768e-05	0.002243	1.88693	0.00016	Gardiner et al., 2019	0.280899	3.8e-05	-4.73613	1.35216	3151.58	3418.38	Alanngua	Pegmatite	65.2962	-52.4528	Gardiner et al., 2019 CMP
318	318_8	2831.08	32.3936	D	7.06869	0.280859	2.3e-05	0.000203	0.0094	1.88691	9.6e-05	Gardiner et al., 2019	0.280848	2.4e-05	-4.03158	0.85421	3219.32	3459.29	Alanngua	Pegmatite	65.2962	-52.4528	Gardiner et al., 2019 CMP
318	318_9	2731.04	24.2981	M	-1.88837	0.280952	6.8e-05	8.35e-05	0.00339	1.88703	0.00015	Gardiner et al., 2019	0.280948	6.8e-05	-2.83693	2.41969	3088.37	3311.11	Alanngua	Pegmatite	65.2962	-52.4528	Gardiner et al., 2019 CMP
318	318_10	2710.04	24.7977	M	-2.13672	0.280894	4e-05	5.205e-05	0.002199	1.88695	0.00015	Gardiner et al., 2019	0.280891	4e-05	-5.33448	1.42328	3161.56	3443.22	Alanngua	Pegmatite	65.2962	-52.4528	Gardiner et al., 2019 CMP
318	318_11	2712.42	26.0941	M	-1.73718	0.2809	4.1e-05	5.38e-05	0.002368	1.88693	0.00014	Gardiner et al., 2019	0.280897	4.2e-05	-5.06826	1.49445	3153.88	3429.27	Alanngua	Pegmatite	65.2962	-52.4528	Gardiner et al., 2019 CMP
318	318_12	2713.04	24.4253	M	-1.29548	0.280852	3e-05	6.48e-05	0.00277	1.88695	0.00014	Gardiner et al., 2019	0.280849	3e-05	-6.78205	1.06747	3217.29	3531.32	Alanngua	Pegmatite	65.2962	-52.4528	Gardiner et al., 2019 CMP
318	318_13	2738.7	25.8787	M	-0.929983	0.280913	3.9e-05	6.77e-05	0.002895	1.88671	0.00012	Gardiner et al., 2019	0.280909	4e-05	-4.01586	1.42337	3138.03	3387.06	Alanngua	Pegmatite	65.2962	-52.4528	Gardiner et al., 2019 CMP
318	318_14	2744.76	24.9731	M	-2.77824	0.280901	3.5e-05	0.0001105	0.00497	1.88702	0.00015	Gardiner et al., 2019	0.280895	3.6e-05	-4.3809	1.28106	3157.07	3413.4	Alanngua	Pegmatite	65.2962	-52.4528	Gardiner et al., 2019 CMP
318	318_15	2709.77	26.1161	M	-0.920248	0.280874	2.8e-05	6.18e-05	0.002403	1.88699	0.00013	Gardiner et al., 2019	0.280871	2.8e-05	-6.07035	0.996295	3188.4	3486.64	Alanngua	Pegmatite	65.2962	-52.4528	Gardiner et al., 2019 CMP
250	250_1	2943.62	41.3927	D	-0.534464	0.28079	4.2e-05	0.0003575	0.010896	1.88696	0.00016	This work	0.28077	4.2e-05	-4.16352	1.49526	3322.31	3553.97	Alanngua	Metatonalite	65.3572	-52.7112	Gardiner et al., 2019 CMP
250	250_2	2993.8	38.3016	I	-0.394623	0.280826	3.6e-05	0.000535	0.0174	1.8868	0.00017	This work	0.280795	3.6e-05	-2.07325	1.28181	3289.88	3469.04	Alanngua	Metatonalite	65.3572	-52.7112	Gardiner et al., 2019 CMP
250	250_3	3003.92	35.998	I	1.41595	0.280809	2.9e-05	0.000361	0.0117	1.88704	0.00014	This work	0.280788	3e-05	-2.08607	1.0682	3297.72	3477.63	Alanngua	Metatonalite	65.3572	-52.7112	Gardiner et al., 2019 CMP
250	250_4	2910.17	37.4892	D	-0.567406	0.280823	3.4e-05	0.000702	0.02458	1.88684	0.00015	This work	0.280784	3.4e-05	-4.4537	1.21036	3307.84	3545.32	Alanngua	Metatonalite	65.3572	-52.7112	Gardiner et al., 2019 CMP
250	250_5	3006.8	35.2442	I	2.5284	0.280785	4.1e-05	0.0002797	0.00897	1.88699	0.00013	This work	0.280769	4.2e-05	-2.70625	1.49549	3322.34	3516.58	Alanngua	Metatonalite	65.3572	-52.7112	Gardiner et al., 2019 CMP
250	250_6	3012.53	36.572	I	3.29878	0.280818	3.5e-05	0.000315	0.01013	1.88672	0.00013	This work	0.2808	3.6e-05	-1.46956	1.28186	3282.11	3447.78	Alanngua	Metatonalite	65.3572	-52.7112	Gardiner et al., 2019 CMP
250	250_7	3001.04	35.3302	I	3.24299	0.280813	4.5e-05	0.0003526	0.01136	1.88696	0.00019	This work	0.280793	4.6e-05	-1.99376	1.63789	3291.78	3469.93	Alanngua	Metatonalite	65.3572	-52.7112	Gardiner et al., 2019 CMP
250	250_8	2970.41	35.7929	I	0.60554	0.280772	3.2e-05	0.0003808	0.01281	1.88668	0.00016	This work	0.28075	3.2e-05	-4.22635	1.13932	3347.85	3578.38	Alanngua	Metatonalite	65.3572	-52.7112	Gardiner et al., 2019 CMP
250	250_9	2981.42	36.3477	I	1.83612	0.280773	3e-05	0.000672	0.0235	1.88694	0.00012	This work	0.280735	3e-05	-4.5272	1.06814	3371.31	3604.66	Alanngua	Metatonalite	65.3572	-52.7112	Gardiner et al., 2019 CMP
250	250_10	2969.67	31.4309	I	-0.719704	0.280759	4.2e-05	0.0006902	0.02372	1.88679	0.00014	This work	0.28072	4.2e-05	-5.3344	1.49536	3391.34	3643.28	Alanngua	Metatonalite	65.3572	-52.7112	Gardiner et al., 2019 CMP
250	250_11	2780.59	53.7943	M	1.07448	0.280753	3.2e-05	0.0002576	0.00921	1.88682	0.00015	This work	0.280739	3.2e-05	-9.08763	1.13881	3362.27	3719.44	Alanngua	Metatonalite	65.3572	-52.7112	Gardiner et al., 2019 CMP
250	250_12	3031.72	25.7966	X	-0.216727	0.280865	3.6e-05	0.001024	0.0341	1.88699	0.00012	This work	0.280805	3.6e-05	-0.816957	1.28192	3279.19	3423.97	Alanngua	Metatonalite	65.3572	-52.7112	Gardiner et al., 2019 CMP
250	250_13	2840.81	45.0188	M	3.7795	0.28078	4.1e-05	0.0002052	0.0069	1.88688	0.00013	This work	0.280769	4.2e-05	-6.6202	1.4949	3322.64	3620	Alanngua	Metatonalite	65.3572	-52.7112	Gardiner et al., 2019 CMP
250	250_14	2977.03	38.589	I	0.648547	0.280814	3.5e-05	0.0002354	0.00761	1.88705	0.00016	This work	0.280801	3.6e-05	-2.28063	1.28176	3280.77	3468.34	Alanngua	Metatonalite	65.3572	-52.7112	Gardiner et al., 2019 CMP
250	250_15	2954.1	38.2512	D	3.33888	0.280792	4.1e-05	0.0003531	0.01152	1.88686	0.00016	This work	0.280772	4.2e-05	-3.83888	1.4953	3319.32	3542.86	Alanngua	Metatonalite	65.3572	-52.7112	Gardiner et al., 2019 CMP
224	224_1	2982.89	33.4377	I	-0.477209	0.280821	3.5e-05	0.0003995	0.01364	1.88684	0.00011	Gardiner et al., 2019	0.280798	3.6e-05	-2.22869	1.28177	3285.18	3469.79	Akia	Metagranitic sheet	65.0377	-52.1937	Gardiner et al., 2019 CMP
224	224_2	2972.62	32.1228	I	2.00032	0.280887	4.5e-05	0.000476	0.01646	1.88674	0.00013	Gardiner et al., 2019	0.28086	4.6e-05	-0.273759	1.63778	3204.73	3345.88	Akia	Metagranitic sheet	65.0377	-52.1937	Gardiner et al., 2019 CMP
224	224_3	2977.76	34.2322	I	-2.31642	0.280836	4.3e-05	0.0003191	0.01067	1.88696	0.00015	Gardiner et al., 2019	0.280818	4.4e-05	-1.65051	1.56659	3258.88	3431.56	Akia	Metagranitic sheet	65.0377	-52.1937	Gardiner et al., 2019 CMP
224	224_4	2984.35	34.1391	I	2.23428	0.280872	4e-05	0.0004483	0.014102	1.88694	0.00015	Gardiner et al., 2019	0.280846	4e-05	-0.478318	1.4242	3222.21	3367.13	Akia	Metagranitic sheet	65.0377	-52.1937	Gardiner et al., 2019 CMP
224	224_5	3008.95	29.5383	I	2.04137	0.280914	3.8e-05	0.002174	0.0797	1.88713	0.00014	Gardiner et al., 2019	0.280788	3.8e-05	-1.96012	1.35307	3311.65	3474.07	Akia	Metagranitic sheet	65.0377	-52.1937	Gardiner et al., 2019 CMP
224	224_6	2986.53	29.0629	I	-1.43651	0.280875	4.2e-05	0.0016	0.0566	1.88707	0.00015	Gardiner et al., 2019	0.280783	4.2e-05	-2.67192	1.49542	3314.88	3498.87	Akia	Metagranitic sheet	65.0377	-52.1937	Gardiner et al., 2019 CMP
224	224_7	2993.15	23.171	I	1.22457	0.280894	3.6e-05	0.001697	0.061	1.88691	0.00017	Gardiner et al., 2019	0.280796	3.6e-05	-2.04511	1.28181	3297.5	3466.87	Akia	Metagranitic sheet	65.0377	-52.1937	Gardiner et al., 2019 CMP
224	224_8	2986.53	24.7311	D	-6.12079	0.28088	4.1e-05	0.00147	0.0517	1.88689	0.00016	Gardiner et al., 2019	0.280796	4.2e-05	-2.22848	1.49542	3296.94	3472.61	Akia	Metagranitic sheet	65.0377	-52.1937	Gardiner et al., 2019 CMP
224	224_9	2975.56	30.6327	I	-0.438639	0.280827	3.6e-05	0.0004961	0.016199	1.88691	0.00013	Gardiner et al., 2019	0.280799	3.6e-05	-2.38244	1.28175	3285.33	3473.23	Akia	Metagranitic sheet	65.0377	-52.1937	Gardiner et al., 2019 CMP
224	224_10	2957.82	29.3684	D	-8.13518	0.280856	3.8e-05	0.000472	0.01428	1.88693	0.00015	Gardiner et al., 2019	0.280829	3.8e-05	-1.71372	1.3529	3245.19	3419.86	Akia	Metagranitic sheet	65.0377	-52.1937	Gardiner et al., 2019 CMP
224	224_11	3024.65	40.5801	I	2.91428	0.280861	5.8e-05	0.0003496	0.01204	1.88672	0.00019	Gardiner et al., 2019	0.280841	5.8e-05	0.273553	2.06528	3228.61	3353.78	Akia	Metagranitic sheet	65.0377	-52.1937	Gardiner et al., 2019 CMP
224	224_12	2997.42	36.0985	I	2.93461	0.280801	3.3e-05	0.000371	0.01238	1.887	0.00021	Gardiner et al., 2019	0.28078	3.4e-05	-2.54315	1.21061	3309.03	3499.67	Akia	Metagranitic sheet	65.0377	-52.1937	Gardiner et al., 2019 CMP
224	224_13	2977.76	32.7827	I	-1.54582	0.280811	4.3e-05	0.0005374	0.01834	1.88703	0.00017	Gardiner et al., 2019	0.28078	4.4e-05	-2.98496	1.56659	3309.83	3510.61	Akia	Metagranitic sheet	65.0377	-52.1937	Gardiner et al., 2019 CMP
224	224_14	2967.46	38.0255	D	16.4102	0.280829	4.5e-05	0.0007719	0.02679	1.88716	0.0002	Gardiner et al., 2019	0.280785	4.6e-05	-3.05904	1.63776	3305.79	3507.03	Akia	Metagranitic sheet	65.0377	-52.1937	Gardiner et al., 2019 CMP
158	158_1	2998.15	26.7935	I	-1.21819	0.280812	3.4e-05	0.0008415	0.02777	1.88695	0.00013	Gardiner et al., 2019	0.280764	3.4e-05	-3.09908	1.21061	3334.21	3533.13	Akia	Metatonalite	65.1761	-51.5631	Gardiner et al., 2019 CMP
158	158_2	2871.18	26.4107	D	16.8393	0.280873	3.3e-05	0.001371	0.0501	1.88701	0.00011	Gardiner et al., 2019	0.280798	3.4e-05	-4.88461	1.21025	3297.9	3540.74	Akia	Metatonalite	65.1761	-51.5631	Gardiner et al., 2019 CMP
158	158_3	2869.59	27.9922	D	7.52557	0.280872	3.3e-05	0.0021	0.0756	1.88704	0.00016	Gardiner et al., 2019	0.280756	3.4e-05	-6.38408	1.21024	3362.77	3628.19	Akia	Metatonalite	65.1761	-51.5631	Gardiner et al., 2019 CMP
158	158_4	3035.95	27.8532	D	6.60057	0.280831	3.9e-05	0.000721	0.02399	1.8869	0.00012	Gardiner et al., 2019	0.280789	4e-05	-1.30152	1.42437	3298.86	3455.97	Akia	Metatonalite	65.1761	-51.5631	Gardiner et al., 2019 CMP
158	158_5	2998.87	26.0712	D	-8.16784	0.28084	2.9e-05	0.000815	0.0266	1.88674	0.00011	Gardiner et al., 2019	0.280793	3e-05	-2.03113	1.06819	3294.84	3470.47	Akia	Metatonalite	65.1761	-51.5631	Gardiner et al., 2019 CMP
158	158_6	3002.48	24.6122	I	0.0571387	0.28085	3.1e-05	0.000768	0.02492	1.88686	0.00016	Gardiner et al., 2019	0.280806	3.2e-05	-1.49542	1.13941	3277.65	3441.52	Akia	Metatonalite	65.1761	-51.5631	Gardiner et al., 2019 CMP
158	158_7	2852.07	27.3697	M	-0.713121	0.280826	2.5e-05	0.001292	0.0458	1.88702	0.00013	Gardiner et al., 2019	0.280755	2.6e-05	-6.83511	0.92544	3354.25	3641.36	Akia	Metatonalite	65.1761	-51.5631	Gardiner et al., 2019 CMP
158	158_8	2930.79	23.653	D	3.27744	0.28084	4.1e-05	0.001512	0.0524	1.88699	0.00011	Gardiner et al., 2019	0.280755	4.2e-05	-4.99443	1.49522	3354.54	3593.21	Akia	Metatonalite	65.1761	-51.5631	Gardiner et al., 2019 CMP
158	158_9	3001.04	23.9077	I	-3.25658	0.280853	4e-05	0.000668	0.02155	1.88685	0.00016	Gardiner et al., 2019	0.280815	4e-05	-1.2167	1.42425	3265.34	3423.88	Akia	Metatonalite	65.1761	-51.5631	Gardiner et al., 2019 CMP
158	158_10	2917.07	30.5689	D	15.8255	0.280855	2.8e-05	0.001435	0.0543	1.88694	0.00012	Gardiner et al., 2019	0.280775	2.8e-05	-4.6157	0.996781	3327.63	3560.24	Akia	Metatonalite	65.1761	-51.5631	Gardiner et al., 2019 CMP
158	158_11	2982.15	30.5561	P	3.5969	0.280847	3.5e-05	0.001516	0.0527	1.88702	0.00015	Gardiner et al., 2019	0.28076	3.6e-05	-3.5961	1.28177	3345.44	3550.18	Akia	Metatonalite	65.1761	-51.5631	Gardiner et al., 2019 CMP
158	158_12	3008.95	26.6971	I	-3.27623	0.28083	2.3e-05	0.001458	0.05156	1.88682	0.00012	Gardiner et al., 2019	0.280746	2.4e-05	-3.4779	0.854569	3363.31	3563.9	Akia	Metatonalite	65.1761	-51.5631	Gardiner et al., 2019 CMP
158	158_13	3001.76	24.6176	I	-2.01993	0.280842	3.1e-05	0.000644	0.0206	1.88683	0.00012	Gardiner et al., 2019	0.280805	3.2e-05	-1.54241	1.13941	3277.88	3443.74	Akia	Metatonalite	65.1761	-51.5631	Gardiner et al., 2019 CMP
158	158_14	3025.35	30.0622	I	2.1952	0.280832	4.4e-05	0.001019	0.03553	1.88701	0.00014	Gardiner et al., 2019	0.280773	4.4e-05	-2.1276	1.56677	3322.75	3496.69	Akia	Metatonalite	65.1761	-51.5631	Gardiner et al., 2019 CMP
158	158_15	2955.59	23.1925	P	1.3523	0.280855	2.9e-05	0.001081	0.0373	1.88687	0.00011	Gardiner et al., 2019	0.280794	3e-05	-3.03133	1.06808	3297.35	3496.21	Akia	Metatonalite	65.1761	-51.5631	Gardiner et al., 2019 CMP
204	204 - 1.1	3011.82	22.7265	D	2.89473	0.280892	2.8e-05	0.000949	0.0436	1.88687	0.00012	This work	0.280837	2.8e-05	-0.157151	0.997004	3236.93	3369.39	Akia	Late pegmatite cutting brecciated, melted metagabbro, and host gneiss	65.0096	-51.6756	Olierook et al., 2021 SD
204	204 - 2.1	2954.1	28.4243	D	-5.00526	0.280897	2.2e-05	0.000421	0.0192	1.88691	0.00012	This work	0.280873	2.2e-05	-0.237701	0.783253	3187.12	3329.37	Akia	Late pegmatite cutting brecciated, melted metagabbro, and host gneiss	65.0096	-51.6756	Olierook et al., 2021 SD
204	204 - 3.1	2951.86	18.1826	D	-3.73099	0.280871	2.8e-05	0.00076	0.0354	1.88684	0.00012	This work	0.280828	2.8e-05	-1.89935	0.996862	3249.16	3426.25	Akia	Late pegmatite cutting brecciated, melted metagabbro, and host gneiss	65.0096	-51.6756	Olierook et al., 2021 SD
204	204 - 4.1	2974.09	21.5267	I	-0.0925313	0.28087	2.4e-05	0.000865	0.04046	1.88697	0.00012	This work	0.280821	2.4e-05	-1.63557	0.854498	3259.21	3427.83	Akia	Late pegmatite cutting brecciated, melted metagabbro, and host gneiss	65.0096	-51.6756	Olierook et al., 2021 SD
204	204 - 5.1	3005.36	25.3046	D	-2.81607	0.280858	2.4e-05	0.000547	0.02492	1.88688	0.00012	This work	0.280826	2.4e-05	-0.689943	0.854561	3248.73	3395.99	Akia	Late pegmatite cutting brecciated, melted metagabbro, and host gneiss	65.0096	-51.6756	Olierook et al., 2021 SD
204	204 - 6.1	3054.13	19.6646	D	5.36955	0.280889	2.6e-05	0.00097	0.0456	1.8869	0.00012	This work	0.280832	2.6e-05	0.664255	0.925882	3242.67	3353.5	Akia	Late pegmatite cutting brecciated, melted metagabbro, and host gneiss	65.0096	-51.6756	Olierook et al., 2021 SD
204	204 - 7.1	3014.68	22.3293	D	0.434691	0.280849	2.2e-05	0.000439	0.0201	1.88681	0.00012	This work	0.280824	2.2e-05	-0.571163	0.783365	3251.68	3396.17	Akia	Late pegmatite cutting brecciated, melted metagabbro, and host gneiss	65.0096	-51.6756	Olierook et al., 2021 SD
204	204 - 8.1	2998.15	27.9157	I	-0.249174	0.280848	2.2e-05	0.000455	0.02102	1.88684	0.00012	This work	0.280822	2.2e-05	-1.02497	0.783335	3254.32	3410.27	Akia	Late pegmatite cutting brecciated, melted metagabbro, and host gneiss	65.0096	-51.6756	Olierook et al., 2021 SD
204	204 - 9.1	2979.23	27.9289	I	0.202833	0.280863	2.6e-05	0.000439	0.0201	1.88694	0.00012	This work	0.280838	2.6e-05	-0.899083	0.925718	3233.29	3388.13	Akia	Late pegmatite cutting brecciated, melted metagabbro, and host gneiss	65.0096	-51.6756	Olierook et al., 2021 SD
204	204 - 10.1	2976.29	20.0465	I	0.788372	0.280858	2.2e-05	0.00066	0.0303	1.88689	0.0001	This work	0.28082	2.2e-05	-1.59507	0.783294	3258.07	3427.14	Akia	Late pegmatite cutting brecciated, melted metagabbro, and host gneiss	65.0096	-51.6756	Olierook et al., 2021 SD
204	204 - 11.1	2990.9	26.6324	I	-0.356839	0.280875	2.2e-05	0.000767	0.0369	1.88683	0.0001	This work	0.280831	2.2e-05	-0.870441	0.783321	3244.43	3395.48	Akia	Late pegmatite cutting brecciated, melted metagabbro, and host gneiss	65.0096	-51.6756	Olierook et al., 2021 SD
204	204 - 12.1	2985.8	19.9132	D	-0.121126	0.28087	2.8e-05	0.000441	0.01999	1.88683	0.00012	This work	0.280845	2.8e-05	-0.500628	0.996942	3224.25	3369.59	Akia	Late pegmatite cutting brecciated, melted metagabbro, and host gneiss	65.0096	-51.6756	Olierook et al., 2021 SD
204	204 - 13.1	2993.08	24.0976	D	2.30048	0.280875	3.2e-05	0.000666	0.0313	1.88695	0.00016	This work	0.280837	3.2e-05	-0.613496	1.13938	3236.1	3381.93	Akia	Late pegmatite cutting brecciated, melted metagabbro, and host gneiss	65.0096	-51.6756	Olierook et al., 2021 SD
204	204 - 14.1	2982.15	21.7653	D	0.02838	0.280867	3e-05	0.000662	0.0309	1.8868	0.0001	This work	0.280829	3e-05	-1.14305	1.06814	3246.34	3404.87	Akia	Late pegmatite cutting brecciated, melted metagabbro, and host gneiss	65.0096	-51.6756	Olierook et al., 2021 SD
204	204 - 15.1	2996.7	20.8314	I	0.649194	0.280865	3e-05	0.00068	0.0317	1.88695	0.00016	This work	0.280826	3e-05	-0.914369	1.06818	3250.47	3402.59	Akia	Late pegmatite cutting brecciated, melted metagabbro, and host gneiss	65.0096	-51.6756	Olierook et al., 2021 SD
204	204 - 16.1	3033.84	20.9895	D	4.28914	0.280878	3.2e-05	0.000662	0.03066	1.88701	0.00012	This work	0.280839	3.2e-05	0.445674	1.13949	3231.8	3350.71	Akia	Late pegmatite cutting brecciated, melted metagabbro, and host gneiss	65.0096	-51.6756	Olierook et al., 2021 SD
204	204 - 17.1	3024.65	27.0541	D	0.762809	0.280905	2.8e-05	0.000744	0.0346	1.88678	0.0001	This work	0.280862	2.8e-05	1.02444	0.997034	3202.77	3309.19	Akia	Late pegmatite cutting brecciated, melted metagabbro, and host gneiss	65.0096	-51.6756	Olierook et al., 2021 SD
204	204 - 18.1	3025.35	20.7657	I	1.40226	0.280847	2.8e-05	0.000348	0.01559	1.88679	0.0001	This work	0.280827	2.8e-05	-0.205063	0.997035	3246.84	3382.74	Akia	Late pegmatite cutting brecciated, melted metagabbro, and host gneiss	65.0096	-51.6756	Olierook et al., 2021 SD
204	204 - 19.1	3024.65	21.1255	D	1.56707	0.280867	2.8e-05	0.000288	0.0129	1.88696	0.0001	This work	0.28085	2.8e-05	0.614633	0.997034	3215.74	3333.53	Akia	Late pegmatite cutting brecciated, melted metagabbro, and host gneiss	65.0096	-51.6756	Olierook et al., 2021 SD
204	204 - 20.1	3005.36	21.4137	I	-0.814529	0.280863	2.6e-05	0.000596	0.02708	1.88691	8e-05	This work	0.280829	2.6e-05	-0.612605	0.925775	3246.18	3391.4	Akia	Late pegmatite cutting brecciated, melted metagabbro, and host gneiss	65.0096	-51.6756	Olierook et al., 2021 SD
204	204 - 21.1	2943.62	19.7706	D	-4.56546	0.280868	2.6e-05	0.000782	0.0355	1.88692	0.00014	This work	0.280824	2.6e-05	-2.24041	0.92564	3254.96	3440.09	Akia	Late pegmatite cutting brecciated, melted metagabbro, and host gneiss	65.0096	-51.6756	Olierook et al., 2021 SD
204	204 - 22.1	2990.17	18.4177	I	1.1126	0.28089	3.2e-05	0.000668	0.0318	1.88674	0.00014	This work	0.280852	3.2e-05	-0.15075	1.13937	3216.42	3352.21	Akia	Late pegmatite cutting brecciated, melted metagabbro, and host gneiss	65.0096	-51.6756	Olierook et al., 2021 SD
204	204 - 23.1	2976.29	23.661	I	-0.304839	0.280855	2.8e-05	0.000659	0.0308	1.88686	0.00016	This work	0.280817	2.8e-05	-1.69985	0.99692	3261.95	3433.35	Akia	Late pegmatite cutting brecciated, melted metagabbro, and host gneiss	65.0096	-51.6756	Olierook et al., 2021 SD
202	202 - 1.1	2997.42	28.2093	I	1.08011	0.280969	2.2e-05	0.001471	0.066	1.88684	0.0001	This work	0.280884	2.2e-05	1.18433	0.783333	3176.81	3278.52	Akia	Opx-bearing leucosome that brecciates host metagabbro	65.0096	-51.6756	Yakymchuk et al., 2020 PR
202	202 - 2.1	3001.76	26.6808	I	-1.71254	0.280889	3e-05	0.001312	0.0599	1.8868	0.00012	This work	0.280813	3e-05	-1.23995	1.06819	3271.37	3425.81	Akia	Opx-bearing leucosome that brecciates host metagabbro	65.0096	-51.6756	Yakymchuk et al., 2020 PR
202	202 - 3.1	3006.8	39.5195	I	-1.96892	0.280857	2.4e-05	0.000544	0.02385	1.88694	0.0001	This work	0.280826	2.4e-05	-0.68597	0.854564	3249.8	3396.87	Akia	Opx-bearing leucosome that brecciates host metagabbro	65.0096	-51.6756	Yakymchuk et al., 2020 PR
202	202 - 4.1	3004.64	26.6264	D	3.07204	0.280926	2.2e-05	0.001261	0.0563	1.88679	0.00012	This work	0.280853	2.2e-05	0.247679	0.783347	3217.36	3339.78	Akia	Opx-bearing leucosome that brecciates host metagabbro	65.0096	-51.6756	Yakymchuk et al., 2020 PR
202	202 - 5.1	2989.45	29.0962	I	0.802491	0.280918	3e-05	0.001069	0.0483	1.88685	0.00016	This work	0.280857	3e-05	0.00982593	1.06816	3212.17	3342.11	Akia	Opx-bearing leucosome that brecciates host metagabbro	65.0096	-51.6756	Yakymchuk et al., 2020 PR
202	202 - 6.1	3009.67	27.249	D	-3.44994	0.280898	3e-05	0.000985	0.0451	1.88687	0.00012	This work	0.280841	3e-05	-0.0669517	1.06821	3231.92	3362.36	Akia	Opx-bearing leucosome that brecciates host metagabbro	65.0096	-51.6756	Yakymchuk et al., 2020 PR
202	202 - 7.1	2979.96	24.1659	I	-2.34878	0.28097	2.6e-05	0.00175	0.07964	1.88694	0.00012	This work	0.28087	2.6e-05	0.257127	0.925719	3198.67	3320.05	Akia	Opx-bearing leucosome that brecciates host metagabbro	65.0096	-51.6756	Yakymchuk et al., 2020 PR
202	202 - 8.1	3008.23	32.3013	I	-0.892256	0.280918	3e-05	0.000997	0.0454	1.88682	0.0001	This work	0.28086	3e-05	0.587597	1.06821	3206.23	3322.38	Akia	Opx-bearing leucosome that brecciates host metagabbro	65.0096	-51.6756	Yakymchuk et al., 2020 PR
202	202 - 9.1	2986.53	32.8007	I	-0.164552	0.280909	2.8e-05	0.001237	0.0566	1.8869	0.0001	This work	0.280838	2.8e-05	-0.720218	0.996944	3238.19	3383.18	Akia	Opx-bearing leucosome that brecciates host metagabbro	65.0096	-51.6756	Yakymchuk et al., 2020 PR
202	202 - 10.1	2983.62	27.0252	I	-0.71035	0.280875	2.8e-05	0.001131	0.05069	1.88696	0.00012	This work	0.28081	2.8e-05	-1.78096	0.996937	3274.85	3443.83	Akia	Opx-bearing leucosome that brecciates host metagabbro	65.0096	-51.6756	Yakymchuk et al., 2020 PR
202	202 - 11.1	3003.92	28.8	I	0.536624	0.28095	3e-05	0.001687	0.0773	1.88695	0.00012	This work	0.280853	3e-05	0.21087	1.0682	3220.59	3341.41	Akia	Opx-bearing leucosome that brecciates host metagabbro	65.0096	-51.6756	Yakymchuk et al., 2020 PR
202	202 - 12.1	3000.31	26.708	I	-1.2524	0.280965	2.8e-05	0.00123	0.0552	1.88688	0.0001	This work	0.280894	2.8e-05	1.6016	0.996976	3162.4	3255.95	Akia	Opx-bearing leucosome that brecciates host metagabbro	65.0096	-51.6756	Yakymchuk et al., 2020 PR
202	202 - 13.1	3003.2	33.1369	I	-1.9576	0.280945	3e-05	0.001433	0.0652	1.88688	0.00016	This work	0.280862	3e-05	0.538262	1.0682	3206.09	3321.4	Akia	Opx-bearing leucosome that brecciates host metagabbro	65.0096	-51.6756	Yakymchuk et al., 2020 PR
202	202 - 14.1	3045.07	18.1826	D	-8.56471	0.280887	2.8e-05	0.000585	0.0261	1.88688	0.00012	This work	0.280853	2.8e-05	1.18693	0.997082	3213.6	3315.42	Akia	Opx-bearing leucosome that brecciates host metagabbro	65.0096	-51.6756	Yakymchuk et al., 2020 PR
202	202 - 15.1	2991.63	28.3251	I	0.630079	0.280955	2.6e-05	0.0013	0.0582	1.88683	0.0001	This work	0.28088	2.6e-05	0.90463	0.925745	3181.59	3290.64	Akia	Opx-bearing leucosome that brecciates host metagabbro	65.0096	-51.6756	Yakymchuk et al., 2020 PR
202	202 - 16.1	3001.76	20.9119	I	-1.19033	0.280921	3e-05	0.001236	0.0565	1.88681	0.00014	This work	0.28085	3e-05	0.0554419	1.06819	3222	3348.96	Akia	Opx-bearing leucosome that brecciates host metagabbro	65.0096	-51.6756	Yakymchuk et al., 2020 PR
202	202 - 17.1	3018.25	22.8077	I	-0.197112	0.280947	3e-05	0.001473	0.0671	1.88689	0.00012	This work	0.280862	3e-05	0.867297	1.06823	3206.72	3313.55	Akia	Opx-bearing leucosome that brecciates host metagabbro	65.0096	-51.6756	Yakymchuk et al., 2020 PR
202	202 - 18.1	3016.11	23.5561	D	17.5404	0.280951	3e-05	0.001264	0.0567	1.88682	0.00012	This work	0.280878	3e-05	1.39246	1.06823	3184.01	3280.67	Akia	Opx-bearing leucosome that brecciates host metagabbro	65.0096	-51.6756	Yakymchuk et al., 2020 PR
202	202 - 19.1	3015.39	24.2821	D	5.18027	0.280939	2.4e-05	0.00108	0.0487	1.88674	0.00012	This work	0.280876	2.4e-05	1.32836	0.854582	3184.99	3283.93	Akia	Opx-bearing leucosome that brecciates host metagabbro	65.0096	-51.6756	Yakymchuk et al., 2020 PR
202	202 - 20.1	3026.06	34.0228	I	0.795947	0.280958	3.2e-05	0.001625	0.0744	1.8869	0.00012	This work	0.280864	3.2e-05	1.12109	1.13947	3204.52	3304.55	Akia	Opx-bearing leucosome that brecciates host metagabbro	65.0096	-51.6756	Yakymchuk et al., 2020 PR
306	306 - 1	2985.8	31.9562	I	2.61185	0.280836	3e-05	0.000608	0.0236	1.88687	0.00012	Gardiner et al., 2019	0.280801	3e-05	-2.05208	1.06815	3282.79	3461.59	Alanngua	Albite-rich orthogneiss	65.2902	-52.3096	Gardiner et al., 2019 CMP
306	306 - 5	3011.82	25.2528	D	4.42308	0.280866	3.6e-05	0.0005792	0.02117	1.8868	8.1e-05	Gardiner et al., 2019	0.280832	3.6e-05	-0.321307	1.28186	3240.84	3379.13	Alanngua	Albite-rich orthogneiss	65.2902	-52.3096	Gardiner et al., 2019 CMP
306	306 - 9	2995.25	24.666	I	0.275934	0.28084	3.24e-05	0.0008189	0.03046	1.8868	0.0001	Gardiner et al., 2019	0.280793	3.2e-05	-2.12247	1.13939	3295.17	3473.08	Alanngua	Albite-rich orthogneiss	65.2902	-52.3096	Gardiner et al., 2019 CMP
306	306 - 13	3003.92	24.6016	D	1.02318	0.280847	2.64e-05	0.0005555	0.02032	1.88674	0.0001	Gardiner et al., 2019	0.280815	2.6e-05	-1.13252	0.925772	3263.93	3421.12	Alanngua	Albite-rich orthogneiss	65.2902	-52.3096	Gardiner et al., 2019 CMP
306	306 - 14	3039.47	29.9038	I	2.74313	0.280834	2.76e-05	0.0003729	0.01358	1.88683	9.4e-05	Gardiner et al., 2019	0.280812	2.8e-05	-0.389628	0.997069	3265.93	3404.64	Alanngua	Albite-rich orthogneiss	65.2902	-52.3096	Gardiner et al., 2019 CMP
306	306 - 15	3034.54	28.5644	I	-3.06011	0.28082	2.76e-05	0.0002697	0.00984	1.88684	7e-05	Gardiner et al., 2019	0.280804	2.8e-05	-0.789038	0.997057	3275.76	3424.5	Alanngua	Albite-rich orthogneiss	65.2902	-52.3096	Gardiner et al., 2019 CMP
306	306 - 16	3018.96	26.6084	D	5.3471	0.280815	3e-05	0.000576	0.02108	1.88694	9.7e-05	Gardiner et al., 2019	0.280782	3e-05	-1.96486	1.06824	3307.8	3482.1	Alanngua	Albite-rich orthogneiss	65.2902	-52.3096	Gardiner et al., 2019 CMP
306	306 - 18	3030.31	27.2083	X	-2.94201	0.280849	3.12e-05	0.0004634	0.01674	1.88677	0.00012	Gardiner et al., 2019	0.280822	3.2e-05	-0.257124	1.13948	3253.69	3389.67	Alanngua	Albite-rich orthogneiss	65.2902	-52.3096	Gardiner et al., 2019 CMP
306	306 - 19	3008.23	47.9538	I	3.74778	0.280825	2.76e-05	0.000427	0.016	1.88691	8.4e-05	Gardiner et al., 2019	0.2808	2.8e-05	-1.55134	0.996995	3282.22	3449.29	Alanngua	Albite-rich orthogneiss	65.2902	-52.3096	Gardiner et al., 2019 CMP
325	325 - 1	2980.69	38.5259	I	-2.66025	0.2809	4.08e-05	0.00144	0.0573	1.88682	0.00012	This work	0.280818	4e-05	-1.58717	1.42419	3267.4	3430.07	Akia	Metatonalite	65.483	-51.9822	Gardiner et al., 2019 CMP
325	325 - 2	2985.8	29.7923	I	-1.35327	0.280844	3.48e-05	0.0004367	0.01571	1.88686	0.00011	This work	0.280819	3.4e-05	-1.41758	1.21057	3258.07	3423.98	Akia	Metatonalite	65.483	-51.9822	Gardiner et al., 2019 CMP
325	325 - 3	3018.96	23.7843	I	-1.43866	0.28089	2.52e-05	0.001057	0.04031	1.88678	8.6e-05	This work	0.280829	2.6e-05	-0.28736	0.925805	3248.59	3382.66	Akia	Metatonalite	65.483	-51.9822	Gardiner et al., 2019 CMP
325	325 - 4	3146.25	22.3006	X	2.81825	0.280813	3.48e-05	0.001269	0.04584	1.88686	8.5e-05	This work	0.280736	3.4e-05	-0.569054	1.21103	3369.68	3498.16	Akia	Metatonalite	65.483	-51.9822	Gardiner et al., 2019 CMP
325	325 - 5	2982.89	30.5476	I	-0.680771	0.280867	3.36e-05	0.0004945	0.01821	1.88682	0.00013	This work	0.280839	3.4e-05	-0.784581	1.21056	3232.57	3384.17	Akia	Metatonalite	65.483	-51.9822	Gardiner et al., 2019 CMP
325	325 - 6	2945.87	30.2394	D	-9.18593	0.280871	2.76e-05	0.000354	0.01385	1.88675	0.00012	This work	0.280851	2.8e-05	-1.22019	0.996848	3215.85	3381.32	Akia	Metatonalite	65.483	-51.9822	Gardiner et al., 2019 CMP
325	325 - 7	3091.84	38.6855	X	3.05044	0.280826	3.12e-05	0.00114	0.0405	1.88681	0.00011	This work	0.280758	3.2e-05	-1.07275	1.13965	3341.12	3485.76	Akia	Metatonalite	65.483	-51.9822	Gardiner et al., 2019 CMP
325	325 - 8	2998.87	37.5025	D	-0.0361326	0.280869	2.88e-05	0.0006737	0.02455	1.88684	9.3e-05	This work	0.28083	2.8e-05	-0.708826	0.996973	3244.66	3392.08	Akia	Metatonalite	65.483	-51.9822	Gardiner et al., 2019 CMP
325	325 - 9	3034.54	32.0494	D	-4.71453	0.280847	2.64e-05	0.001151	0.0427	1.88686	8.8e-05	This work	0.28078	2.6e-05	-1.65689	0.925839	3313.99	3475.93	Akia	Metatonalite	65.483	-51.9822	Gardiner et al., 2019 CMP
325	325 - 10	3011.82	27.3807	D	4.13568	0.280838	3.24e-05	0.000543	0.0202	1.88684	9.7e-05	This work	0.280807	3.2e-05	-1.24375	1.13943	3274.75	3433.84	Akia	Metatonalite	65.483	-51.9822	Gardiner et al., 2019 CMP
325	325 - 11	2987.99	31.2087	I	-0.42747	0.280836	2.76e-05	0.000706	0.0264	1.88693	0.00011	This work	0.280795	2.8e-05	-2.20158	0.996947	3290.99	3472.14	Akia	Metatonalite	65.483	-51.9822	Gardiner et al., 2019 CMP
325	325 - 12	3049.96	35.9862	X	-3.65528	0.280855	3.36e-05	0.001087	0.03973	1.88682	8.3e-05	This work	0.280791	3.4e-05	-0.886525	1.21076	3297.86	3442.24	Akia	Metatonalite	65.483	-51.9822	Gardiner et al., 2019 CMP
325	325 - 13	3010.38	23.1324	D	-8.80027	0.280848	3.24e-05	0.00089	0.0293	1.88677	9.8e-05	This work	0.280797	3.2e-05	-1.6353	1.13943	3290.53	3455.93	Akia	Metatonalite	65.483	-51.9822	Gardiner et al., 2019 CMP
325	325 - 14	3000.31	23.9127	D	9.33116	0.280856	3.12e-05	0.000691	0.0256	1.88692	0.00012	This work	0.280816	3.2e-05	-1.17377	1.1394	3263.29	3420.77	Akia	Metatonalite	65.483	-51.9822	Gardiner et al., 2019 CMP
325	325 - 15	3156.62	20.7012	D	8.42897	0.280879	2.88e-05	0.001948	0.07226	1.88685	9.5e-05	This work	0.280761	2.8e-05	0.550213	0.997345	3339.77	3439.94	Akia	Metatonalite	65.483	-51.9822	Gardiner et al., 2019 CMP
325	325 - 16	2997.42	36.0985	I	0.497074	0.280844	3.36e-05	0.0005984	0.022	1.88679	0.00014	This work	0.28081	3.4e-05	-1.47812	1.21061	3271.44	3436.58	Akia	Metatonalite	65.483	-51.9822	Gardiner et al., 2019 CMP
325	325 - 17	2991.63	23.973	D	10.9126	0.28087	3.36e-05	0.000904	0.0357	1.88694	0.00012	This work	0.280818	3.4e-05	-1.31191	1.21059	3262.46	3422.23	Akia	Metatonalite	65.483	-51.9822	Gardiner et al., 2019 CMP
325	325 - 18	3005.72	22.5916	I	1.62401	0.280851	3e-05	0.000915	0.02793	1.88677	9.5e-05	This work	0.280798	3e-05	-1.68717	1.0682	3288.65	3455.39	Akia	Metatonalite	65.483	-51.9822	Gardiner et al., 2019 CMP
325	325 - 19	3143.38	21.4115	D	3.26635	0.280889	2.64e-05	0.00092	0.03264	1.88675	0.00011	This work	0.280833	2.6e-05	2.82394	0.926077	3238.52	3294.72	Akia	Metatonalite	65.483	-51.9822	Gardiner et al., 2019 CMP
409	409 - 1	3030.31	25.8083	I	1.2423	0.280907	3.12e-05	0.00174	0.0649	1.88683	0.00012	This work	0.280806	3.2e-05	-0.837795	1.13948	3283.54	3424.11	Akia	Kimberlite	65.1809	-51.8127	Olierook et al., 2021 SD
409	409 - 2	3031.72	27.8943	D	2.22603	0.280852	3.48e-05	0.00087	0.032	1.88685	0.00012	This work	0.280801	3.4e-05	-0.960526	1.2107	3283.54	3432.48	Akia	Kimberlite	65.1809	-51.8127	Olierook et al., 2021 SD
409	409 - 3	3011.82	28.0897	D	-2.2242	0.280837	3.36e-05	0.000672	0.0264	1.88691	0.00011	This work	0.280798	3.4e-05	-1.54505	1.21065	3286.82	3451.69	Akia	Kimberlite	65.1809	-51.8127	Olierook et al., 2021 SD
409	409 - 5	3017.53	44.9272	I	2.22536	0.280834	3e-05	0.0006353	0.02531	1.88694	9.8e-05	This work	0.280797	3e-05	-1.44379	1.06823	3287.71	3450.12	Akia	Kimberlite	65.1809	-51.8127	Olierook et al., 2021 SD
409	409 - 7	3015.39	29.4682	D	-0.118013	0.280853	3e-05	0.000868	0.0334	1.88684	9.7e-05	This work	0.280803	3e-05	-1.29672	1.06823	3282.04	3439.75	Akia	Kimberlite	65.1809	-51.8127	Olierook et al., 2021 SD
529	529 - 1	3025.35	25.8494	D	-5.27972	0.280891	3.48e-05	0.00131	0.045	1.8868	8.7e-05	This work	0.280815	3.4e-05	-0.628835	1.21069	3268.51	3407.88	Akia	Kimberlite	65.2038	-52.2092	Olierook et al., 2021 SD
529	529 - 4	3014.68	25.9384	I	-1.11678	0.280893	3.24e-05	0.001452	0.0572	1.88678	0.00011	This work	0.280809	3.2e-05	-1.09284	1.13944	3277.87	3427.11	Akia	Kimberlite	65.2038	-52.2092	Olierook et al., 2021 SD
529	529 - 6	2983.62	25.4769	D	5.39408	0.280881	3.24e-05	0.000947	0.03455	1.88691	0.00013	This work	0.280827	3.2e-05	-1.19204	1.13936	3251.41	3408.91	Akia	Kimberlite	65.2038	-52.2092	Olierook et al., 2021 SD
529	529 - 7	2938.35	43.7223	D	-0.0761494	0.280869	3.48e-05	0.000825	0.0299	1.88688	9.8e-05	This work	0.280822	3.4e-05	-2.41253	1.21044	3257.21	3446.22	Akia	Kimberlite	65.2038	-52.2092	Olierook et al., 2021 SD
529	529 - 11	2971.14	23.3859	D	-3.32728	0.280892	3.96e-05	0.001553	0.0535	1.88691	0.00013	This work	0.280803	4e-05	-2.31719	1.42415	3287.84	3465.95	Akia	Kimberlite	65.2038	-52.2092	Olierook et al., 2021 SD
529	529 - 12	3006.08	27.4347	I	0.163307	0.280899	2.52e-05	0.001719	0.0669	1.8868	0.00014	This work	0.2808	2.6e-05	-1.62242	0.925776	3292.61	3451.83	Akia	Kimberlite	65.2038	-52.2092	Olierook et al., 2021 SD
529	529 - 14	3099.93	39.8716	X	3.17301	0.28088	3e-05	0.00103	0.0364	1.88684	0.00014	This work	0.280819	3e-05	1.26896	1.06844	3259.68	3353.22	Akia	Kimberlite	65.2038	-52.2092	Olierook et al., 2021 SD
529	529 - 16	3017.53	25.2079	D	-4.2452	0.280864	3.12e-05	0.001224	0.0423	1.8869	0.00011	This work	0.280793	3.2e-05	-1.59041	1.13945	3297.45	3458.81	Akia	Kimberlite	65.2038	-52.2092	Olierook et al., 2021 SD
739	739 - 1	3003.92	24.6016	S	-1.23805	0.280845	3e-05	0.000667	0.02285	1.88693	9.7e-05	This work	0.280807	3e-05	-1.43275	1.0682	3275.83	3438.92	Alanngua	Psammite	65.4128	-52.5225	Gardiner et al., 2019 CMP
739	739 - 2	3040.17	26.4222	D	-6.66003	0.280761	3.96e-05	0.000701	0.02369	1.88707	0.00011	This work	0.28072	4e-05	-3.65506	1.42439	3389.63	3598.5	Alanngua	Psammite	65.4128	-52.5225	Gardiner et al., 2019 CMP
739	739 - 3	3059.68	24.1953	D	0.975363	0.280799	4.56e-05	0.000782	0.026	1.8869	0.00011	This work	0.280753	4.6e-05	-2.01976	1.63812	3346.36	3516.89	Alanngua	Psammite	65.4128	-52.5225	Gardiner et al., 2019 CMP
739	739 - 6	3064.52	25.528	S	-1.35163	0.280794	3.12e-05	0.000685	0.0234	1.88701	0.00012	This work	0.280754	3.2e-05	-1.8827	1.13957	3344.7	3512.52	Alanngua	Psammite	65.4128	-52.5225	Gardiner et al., 2019 CMP
739	739 - 7	3051.35	26.325	S	3.49624	0.28081	3.36e-05	0.000777	0.0269	1.88679	0.00011	This work	0.280764	3.4e-05	-1.80997	1.21076	3331.37	3498.02	Alanngua	Psammite	65.4128	-52.5225	Gardiner et al., 2019 CMP
739	739 - 8	2973.35	23.3714	D	9.50647	0.280871	2.76e-05	0.000873	0.03265	1.88679	0.00012	This work	0.280821	2.8e-05	-1.63314	0.996913	3258.55	3427.12	Alanngua	Psammite	65.4128	-52.5225	Gardiner et al., 2019 CMP
739	739 - 9	3044.37	30.5413	D	5.70273	0.2808	3.48e-05	0.000591	0.01926	1.88692	0.0001	This work	0.280765	3.4e-05	-1.93989	1.21074	3328.82	3500.3	Alanngua	Psammite	65.4128	-52.5225	Gardiner et al., 2019 CMP
739	739 - 11	3013.96	28.7762	D	4.04001	0.280829	3.36e-05	0.000908	0.0349	1.88679	0.00013	This work	0.280776	3.4e-05	-2.26663	1.21065	3317.3	3496.1	Alanngua	Psammite	65.4128	-52.5225	Gardiner et al., 2019 CMP
747	747 - 2	2996.7	24.6552	D	3.65215	0.2809	3.48e-05	0.00168	0.0614	1.88683	0.00011	Gardiner et al., 2019	0.280803	3.4e-05	-1.71704	1.2106	3287.89	3450.18	Alanngua	Metatonalite	65.3562	-52.4337	Gardiner et al., 2019 CMP
747	747 - 6	2973.35	28.4742	X	-2.85965	0.280889	3.24e-05	0.001178	0.0423	1.88691	0.00012	Gardiner et al., 2019	0.280822	3.2e-05	-1.61214	1.13933	3260.06	3425.87	Alanngua	Metatonalite	65.3562	-52.4337	Gardiner et al., 2019 CMP
747	747 - 7	2821.29	26.035	I	-1.48977	0.280892	3.12e-05	0.001206	0.0421	1.88685	0.00012	Gardiner et al., 2019	0.280827	3.2e-05	-5.01681	1.13892	3258.4	3510.11	Alanngua	Metatonalite	65.3562	-52.4337	Gardiner et al., 2019 CMP
747	747 - 8	2986.53	26.1758	X	-1.73309	0.280899	3.48e-05	0.001277	0.04541	1.8869	9.5e-05	Gardiner et al., 2019	0.280826	3.4e-05	-1.15794	1.21057	3254.98	3409.15	Alanngua	Metatonalite	65.3562	-52.4337	Gardiner et al., 2019 CMP
747	747 - 9	2961.53	27.1251	D	-5.90882	0.280872	3.36e-05	0.000757	0.0257	1.88693	8.4e-05	Gardiner et al., 2019	0.280829	3.4e-05	-1.63449	1.2105	3247.58	3418.04	Alanngua	Metatonalite	65.3562	-52.4337	Gardiner et al., 2019 CMP
747	747 - 10	2980.69	29.1246	X	2.85842	0.280858	3e-05	0.000471	0.0181	1.88687	0.00011	Gardiner et al., 2019	0.280831	3e-05	-1.10818	1.06814	3242.48	3401.67	Alanngua	Metatonalite	65.3562	-52.4337	Gardiner et al., 2019 CMP
747	747 - 11	2976.29	26.9905	D	-0.127568	0.280869	2.52e-05	0.00099	0.0374	1.88688	0.00011	Gardiner et al., 2019	0.280812	2.6e-05	-1.87479	0.925711	3270.99	3443.72	Alanngua	Metatonalite	65.3562	-52.4337	Gardiner et al., 2019 CMP
747	747 - 12	2995.25	28.2541	D	4.51513	0.280911	4.08e-05	0.001107	0.0401	1.88681	0.00011	Gardiner et al., 2019	0.280847	4e-05	-0.184441	1.42424	3224.68	3358.15	Alanngua	Metatonalite	65.3562	-52.4337	Gardiner et al., 2019 CMP
747	747 - 13	3003.92	29.5932	D	2.92592	0.280899	3.72e-05	0.00142	0.052	1.88685	0.00012	Gardiner et al., 2019	0.280817	3.8e-05	-1.05665	1.35305	3267.06	3416.62	Alanngua	Metatonalite	65.3562	-52.4337	Gardiner et al., 2019 CMP
747	747 - 14	3001.76	25.3323	D	2.44657	0.28089	3.72e-05	0.001155	0.04307	1.88698	0.00013	Gardiner et al., 2019	0.280823	3.8e-05	-0.882108	1.35304	3256.79	3404.59	Alanngua	Metatonalite	65.3562	-52.4337	Gardiner et al., 2019 CMP
747	747 - 15	2971.14	31.4129	D	5.61401	0.280886	3.6e-05	0.00076	0.0273	1.88683	0.00013	Gardiner et al., 2019	0.280843	3.6e-05	-0.920389	1.28174	3229.27	3383.13	Alanngua	Metatonalite	65.3562	-52.4337	Gardiner et al., 2019 CMP
747	747 - 16	3015.39	31.5876	D	-6.21371	0.280876	3.24e-05	0.000747	0.0266	1.88686	9.7e-05	Gardiner et al., 2019	0.280833	3.2e-05	-0.228231	1.13944	3241.45	3376.38	Alanngua	Metatonalite	65.3562	-52.4337	Gardiner et al., 2019 CMP
747	747 - 17	2988.72	26.1572	D	5.49995	0.280892	3.12e-05	0.00101	0.0357	1.88674	0.00011	Gardiner et al., 2019	0.280834	3.2e-05	-0.811998	1.13937	3242	3390.32	Alanngua	Metatonalite	65.3562	-52.4337	Gardiner et al., 2019 CMP
747	747 - 19	2994.53	24.6714	D	6.21178	0.280912	2.76e-05	0.001557	0.0567	1.88676	0.00012	Gardiner et al., 2019	0.280822	2.8e-05	-1.08669	0.996963	3261.12	3411.12	Alanngua	Metatonalite	65.3562	-52.4337	Gardiner et al., 2019 CMP
747	747 - 20	3003.2	31.7387	D	4.82286	0.280917	3.36e-05	0.001759	0.0642	1.88684	9.8e-05	Gardiner et al., 2019	0.280816	3.4e-05	-1.12816	1.21062	3271.57	3420.3	Alanngua	Metatonalite	65.3562	-52.4337	Gardiner et al., 2019 CMP
747	747 - 21	3001.76	28.9032	X	-0.801196	0.280923	4.56e-05	0.001295	0.0454	1.8868	0.0001	Gardiner et al., 2019	0.280848	4.6e-05	0.00555964	1.6379	3224.23	3351.92	Alanngua	Metatonalite	65.3562	-52.4337	Gardiner et al., 2019 CMP
566	566_2	3022.52	25.1688	I	-1.9814	0.280861	5.5e-05	0.000892	0.03191	1.88682	0.00018	Gardiner et al., 2019	0.280809	5.6e-05	-0.897494	1.99406	3273.43	3421.61	Akia	Metatrondhjemite	65.0812	-51.922	Gardiner et al., 2019 CMP
566	566_3	2987.99	24.7202	D	1.86016	0.2809	4.7e-05	0.001047	0.037	1.88688	0.00017	Gardiner et al., 2019	0.28084	4.8e-05	-0.61941	1.70905	3234.4	3378.33	Akia	Metatrondhjemite	65.0812	-51.922	Gardiner et al., 2019 CMP
566	566_4	2988.72	34.7964	I	-1.18698	0.280863	4.1e-05	0.00103	0.0371	1.88687	0.00016	Gardiner et al., 2019	0.280804	4.2e-05	-1.88542	1.49542	3282.36	3453.97	Akia	Metatrondhjemite	65.0812	-51.922	Gardiner et al., 2019 CMP
566	566_5	3026.06	23.0328	D	3.18958	0.28081	4.2e-05	0.000552	0.01986	1.88695	0.00014	Gardiner et al., 2019	0.280778	4.2e-05	-1.92821	1.49556	3312.37	3485.43	Akia	Metatrondhjemite	65.0812	-51.922	Gardiner et al., 2019 CMP
566	566_6	2961.53	38.8572	I	-3.66263	0.280837	4.5e-05	0.000666	0.0228	1.88677	0.00014	Gardiner et al., 2019	0.280799	4.6e-05	-2.69641	1.63774	3286.32	3480.98	Akia	Metatrondhjemite	65.0812	-51.922	Gardiner et al., 2019 CMP
566	566_7	3007.51	43.7315	I	-1.94457	0.280865	5.3e-05	0.0003066	0.0116	1.88695	0.00015	Gardiner et al., 2019	0.280847	5.4e-05	0.103802	1.92277	3219.87	3350.56	Akia	Metatrondhjemite	65.0812	-51.922	Gardiner et al., 2019 CMP
566	566_8	3039.89	20.9262	D	-7.22056	0.28084	4.6e-05	0.000698	0.03	1.88717	0.00015	Gardiner et al., 2019	0.280799	4.6e-05	-0.842158	1.63804	3285.03	3431.8	Akia	Metatrondhjemite	65.0812	-51.922	Gardiner et al., 2019 CMP
566	566_9	3034.54	24.3767	I	-0.1103	0.280874	4.4e-05	0.000588	0.02114	1.88674	0.00015	Gardiner et al., 2019	0.28084	4.4e-05	0.473169	1.5668	3231	3349.62	Akia	Metatrondhjemite	65.0812	-51.922	Gardiner et al., 2019 CMP
566	566_10	3047.17	31.1994	X	-2.18986	0.280837	4e-05	0.0005807	0.0206	1.88685	0.00012	Gardiner et al., 2019	0.280803	4e-05	-0.535905	1.42441	3279.2	3419.29	Akia	Metatrondhjemite	65.0812	-51.922	Gardiner et al., 2019 CMP
566	566_11	2999.59	32.4976	I	-4.45931	0.280836	4.9e-05	0.00025	0.00891	1.88684	0.00015	Gardiner et al., 2019	0.280822	5e-05	-0.998133	1.78031	3253.22	3409.8	Akia	Metatrondhjemite	65.0812	-51.922	Gardiner et al., 2019 CMP
566	566_12	3027.48	25.8317	I	-2.99882	0.280858	5.1e-05	0.000715	0.0261	1.88692	0.00015	Gardiner et al., 2019	0.280816	5.2e-05	-0.523583	1.85165	3262.64	3403.28	Akia	Metatrondhjemite	65.0812	-51.922	Gardiner et al., 2019 CMP
566	566_13	2995.25	37.5622	D	-7.51632	0.280875	4.4e-05	0.0003358	0.01275	1.88693	0.00015	Gardiner et al., 2019	0.280856	4.4e-05	0.113054	1.56666	3209.13	3340.49	Akia	Metatrondhjemite	65.0812	-51.922	Gardiner et al., 2019 CMP
566	566_14	3007.51	42.3169	I	-1.41102	0.280805	4.5e-05	0.0003066	0.011624	1.88677	0.00013	Gardiner et al., 2019	0.280787	4.6e-05	-2.03261	1.63792	3298.43	3477.25	Akia	Metatrondhjemite	65.0812	-51.922	Gardiner et al., 2019 CMP
566	566_15	3027.48	24.4282	I	1.29732	0.280822	5.1e-05	0.000922	0.034	1.8869	0.00014	Gardiner et al., 2019	0.280768	5.2e-05	-2.23412	1.85165	3327.79	3504.64	Akia	Metatrondhjemite	65.0812	-51.922	Gardiner et al., 2019 CMP
575	575_1	3001.76	27.4754	D	2.3648	0.280865	5.7e-05	0.0009181	0.03038	1.88691	0.00015	Gardiner et al., 2019	0.280812	5.8e-05	-1.28604	2.06517	3270.29	3428.55	Akia	Leucogranitic orthogneiss	65.3296	-51.7844	Gardiner et al., 2019 CMP
575	575_3	2989.45	26.151	D	2.0448	0.280881	4.8e-05	0.001435	0.0474	1.88696	0.00012	Gardiner et al., 2019	0.280799	4.8e-05	-2.05558	1.70906	3292.6	3464.62	Akia	Leucogranitic orthogneiss	65.3296	-51.7844	Gardiner et al., 2019 CMP
575	575_4	3007.51	25.9984	D	5.01445	0.280938	5.3e-05	0.001062	0.03506	1.88692	0.00015	Gardiner et al., 2019	0.280877	5.4e-05	1.1496	1.92277	3184.85	3288.43	Akia	Leucogranitic orthogneiss	65.3296	-51.7844	Gardiner et al., 2019 CMP
575	575_5	3006.08	24.5856	I	-1.28574	0.280855	4.5e-05	0.000851	0.02759	1.88683	0.00018	Gardiner et al., 2019	0.280806	4.6e-05	-1.40493	1.63791	3277.96	3438.94	Akia	Leucogranitic orthogneiss	65.3296	-51.7844	Gardiner et al., 2019 CMP
575	575_6	3035.25	28.5572	I	0.0455502	0.280881	4e-05	0.002345	0.08587	1.88705	0.00012	Gardiner et al., 2019	0.280744	4e-05	-2.90905	1.42437	3372.25	3550.59	Akia	Leucogranitic orthogneiss	65.3296	-51.7844	Gardiner et al., 2019 CMP
575	575_7	3058.99	29.0017	D	6.11278	0.280884	4.5e-05	0.003275	0.1238	1.88691	0.00013	Gardiner et al., 2019	0.280692	4.6e-05	-4.22665	1.63812	3453.51	3646.8	Akia	Leucogranitic orthogneiss	65.3296	-51.7844	Gardiner et al., 2019 CMP
575	575_9	3011.1	25.9683	D	2.39614	0.280817	5.2e-05	0.0010983	0.03603	1.88702	0.00015	Gardiner et al., 2019	0.280753	5.2e-05	-3.15155	1.85157	3349.55	3546.26	Akia	Leucogranitic orthogneiss	65.3296	-51.7844	Gardiner et al., 2019 CMP
575	575_10	3016.11	32.2846	D	9.3858	0.280918	4.9e-05	0.00218	0.076	1.887	0.00016	Gardiner et al., 2019	0.280792	5e-05	-1.67195	1.78038	3306.67	3462.54	Akia	Leucogranitic orthogneiss	65.3296	-51.7844	Gardiner et al., 2019 CMP
575	575_12	3003.92	30.3055	I	0.212854	0.280867	5.5e-05	0.00121	0.044	1.88698	0.00015	Gardiner et al., 2019	0.280797	5.6e-05	-1.76472	1.99397	3292.24	3458.59	Akia	Leucogranitic orthogneiss	65.3296	-51.7844	Gardiner et al., 2019 CMP
318	318_1	2739.82	21.3982	D	-4.92974	0.280943	5.2e-05	0.0001069	0.00496	1.88687	0.00016	Gardiner et al., 2019	0.280937	5.2e-05	-2.99511	1.85039	3101.94	3327.3	Alanngua	Pegmatite	65.2962	-52.4528	Gardiner et al., 2019 CMP
318	318_2	2772.14	30.6451	M	-3.22956	0.280911	4.1e-05	0.000114	0.005	1.88694	0.00018	Gardiner et al., 2019	0.280905	4.2e-05	-3.3904	1.49466	3144.29	3375.74	Alanngua	Pegmatite	65.2962	-52.4528	Gardiner et al., 2019 CMP
318	318_3	2755.94	30.832	D	-4.61519	0.280918	4.6e-05	0.0002412	0.01045	1.88688	0.00013	Gardiner et al., 2019	0.280905	4.6e-05	-3.75958	1.63695	3145.19	3385.16	Alanngua	Pegmatite	65.2962	-52.4528	Gardiner et al., 2019 CMP
318	318_5	2743.03	24.9861	M	0.364808	0.280919	5.1e-05	0.000142	0.007	1.88711	0.00018	Gardiner et al., 2019	0.280912	5.2e-05	-3.83975	1.85041	3136.05	3379.95	Alanngua	Pegmatite	65.2962	-52.4528	Gardiner et al., 2019 CMP
318	318_6	2708.88	22.8732	D	-6.37177	0.280886	4.7e-05	0.00011	0.00485	1.88674	0.00012	Gardiner et al., 2019	0.28088	4.8e-05	-5.75308	1.70793	3176.6	3467.15	Alanngua	Pegmatite	65.2962	-52.4528	Gardiner et al., 2019 CMP
318	318_7	2723.87	25.9999	M	1.26473	0.280902	4.8e-05	5.768e-05	0.002243	1.88693	0.00016	Gardiner et al., 2019	0.280899	4.8e-05	-4.73613	1.70799	3151.58	3418.38	Alanngua	Pegmatite	65.2962	-52.4528	Gardiner et al., 2019 CMP
318	318_8	2831.08	32.3936	D	7.06869	0.280859	3.7e-05	0.000203	0.0094	1.88691	9.6e-05	Gardiner et al., 2019	0.280848	3.8e-05	-4.03158	1.3525	3219.32	3459.29	Alanngua	Pegmatite	65.2962	-52.4528	Gardiner et al., 2019 CMP
318	318_9	2731.04	24.2981	M	-1.88837	0.280952	7.4e-05	8.35e-05	0.00339	1.88703	0.00015	Gardiner et al., 2019	0.280948	7.4e-05	-2.83693	2.6332	3088.37	3311.11	Alanngua	Pegmatite	65.2962	-52.4528	Gardiner et al., 2019 CMP
318	318_10	2710.04	24.7977	M	-2.13672	0.280894	4.9e-05	5.205e-05	0.002199	1.88695	0.00015	Gardiner et al., 2019	0.280891	5e-05	-5.33448	1.7791	3161.56	3443.22	Alanngua	Pegmatite	65.2962	-52.4528	Gardiner et al., 2019 CMP
318	318_11	2712.42	26.0941	M	-1.73718	0.2809	5e-05	5.38e-05	0.002368	1.88693	0.00014	Gardiner et al., 2019	0.280897	5e-05	-5.06826	1.77911	3153.88	3429.27	Alanngua	Pegmatite	65.2962	-52.4528	Gardiner et al., 2019 CMP
318	318_12	2713.04	24.4253	M	-1.29548	0.280852	4.1e-05	6.48e-05	0.00277	1.88695	0.00014	Gardiner et al., 2019	0.280849	4.2e-05	-6.78205	1.49445	3217.29	3531.32	Alanngua	Pegmatite	65.2962	-52.4528	Gardiner et al., 2019 CMP
318	318_13	2738.7	25.8787	M	-0.929983	0.280913	4.8e-05	6.77e-05	0.002895	1.88671	0.00012	Gardiner et al., 2019	0.280909	4.8e-05	-4.01586	1.70805	3138.03	3387.06	Alanngua	Pegmatite	65.2962	-52.4528	Gardiner et al., 2019 CMP
318	318_14	2744.76	24.9731	M	-2.77824	0.280901	4.5e-05	0.0001105	0.00497	1.88702	0.00015	Gardiner et al., 2019	0.280895	4.6e-05	-4.3809	1.6369	3157.07	3413.4	Alanngua	Pegmatite	65.2962	-52.4528	Gardiner et al., 2019 CMP
318	318_15	2709.77	26.1161	M	-0.920248	0.280874	4e-05	6.18e-05	0.002403	1.88699	0.00013	Gardiner et al., 2019	0.280871	4e-05	-6.07035	1.42328	3188.4	3486.64	Alanngua	Pegmatite	65.2962	-52.4528	Gardiner et al., 2019 CMP
224	224_1	2982.89	33.4377	I	-0.477209	0.280821	4.5e-05	0.0003995	0.01364	1.88684	0.00011	Gardiner et al., 2019	0.280798	4.6e-05	-2.22869	1.63782	3285.18	3469.79	Akia	Metagranitic sheet	65.0377	-52.1937	Gardiner et al., 2019 CMP
224	224_2	2972.62	32.1228	I	2.00032	0.280887	5.3e-05	0.000476	0.01646	1.88674	0.00013	Gardiner et al., 2019	0.28086	5.4e-05	-0.273759	1.92261	3204.73	3345.88	Akia	Metagranitic sheet	65.0377	-52.1937	Gardiner et al., 2019 CMP
224	224_3	2977.76	34.2322	I	-2.31642	0.280836	5.2e-05	0.0003191	0.01067	1.88696	0.00015	Gardiner et al., 2019	0.280818	5.2e-05	-1.65051	1.85143	3258.88	3431.56	Akia	Metagranitic sheet	65.0377	-52.1937	Gardiner et al., 2019 CMP
224	224_4	2984.35	34.1391	I	2.23428	0.280872	5e-05	0.0004483	0.014102	1.88694	0.00015	Gardiner et al., 2019	0.280846	5e-05	-0.478318	1.78025	3222.21	3367.13	Akia	Metagranitic sheet	65.0377	-52.1937	Gardiner et al., 2019 CMP
224	224_5	3008.95	29.5383	I	2.04137	0.280914	4.8e-05	0.002174	0.0797	1.88713	0.00014	Gardiner et al., 2019	0.280788	4.8e-05	-1.96012	1.70914	3311.65	3474.07	Akia	Metagranitic sheet	65.0377	-52.1937	Gardiner et al., 2019 CMP
224	224_6	2986.53	29.0629	I	-1.43651	0.280875	5.1e-05	0.0016	0.0566	1.88707	0.00015	Gardiner et al., 2019	0.280783	5.2e-05	-2.67192	1.85147	3314.88	3498.87	Akia	Metagranitic sheet	65.0377	-52.1937	Gardiner et al., 2019 CMP
224	224_7	2993.15	23.171	I	1.22457	0.280894	4.6e-05	0.001697	0.061	1.88691	0.00017	Gardiner et al., 2019	0.280796	4.6e-05	-2.04511	1.63786	3297.5	3466.87	Akia	Metagranitic sheet	65.0377	-52.1937	Gardiner et al., 2019 CMP
224	224_8	2986.53	24.7311	D	-6.12079	0.28088	5e-05	0.00147	0.0517	1.88689	0.00016	Gardiner et al., 2019	0.280796	5e-05	-2.22848	1.78026	3296.94	3472.61	Akia	Metagranitic sheet	65.0377	-52.1937	Gardiner et al., 2019 CMP
224	224_9	2975.56	30.6327	I	-0.438639	0.280827	4.6e-05	0.0004961	0.016199	1.88691	0.00013	Gardiner et al., 2019	0.280799	4.6e-05	-2.38244	1.63779	3285.33	3473.23	Akia	Metagranitic sheet	65.0377	-52.1937	Gardiner et al., 2019 CMP
224	224_10	2957.82	29.3684	D	-8.13518	0.280856	4.7e-05	0.000472	0.01428	1.88693	0.00015	Gardiner et al., 2019	0.280829	4.8e-05	-1.71372	1.70893	3245.19	3419.86	Akia	Metagranitic sheet	65.0377	-52.1937	Gardiner et al., 2019 CMP
224	224_11	3024.65	40.5801	I	2.91428	0.280861	6.4e-05	0.0003496	0.01204	1.88672	0.00019	Gardiner et al., 2019	0.280841	6.4e-05	0.273553	2.27893	3228.61	3353.78	Akia	Metagranitic sheet	65.0377	-52.1937	Gardiner et al., 2019 CMP
224	224_12	2997.42	36.0985	I	2.93461	0.280801	4.4e-05	0.000371	0.01238	1.887	0.00021	Gardiner et al., 2019	0.28078	4.4e-05	-2.54315	1.56667	3309.03	3499.67	Akia	Metagranitic sheet	65.0377	-52.1937	Gardiner et al., 2019 CMP
224	224_13	2977.76	32.7827	I	-1.54582	0.280811	5.2e-05	0.0005374	0.01834	1.88703	0.00017	Gardiner et al., 2019	0.28078	5.2e-05	-2.98496	1.85143	3309.83	3510.61	Akia	Metagranitic sheet	65.0377	-52.1937	Gardiner et al., 2019 CMP
158	158_1	2998.15	26.7935	I	-1.21819	0.280812	4.5e-05	0.0008415	0.02777	1.88695	0.00013	Gardiner et al., 2019	0.280764	4.6e-05	-3.09908	1.63788	3334.21	3533.13	Akia	Metatonalite	65.1761	-51.5631	Gardiner et al., 2019 CMP
158	158_3	2869.59	27.9922	D	7.52557	0.280872	4.4e-05	0.0021	0.0756	1.88704	0.00016	Gardiner et al., 2019	0.280756	4.4e-05	-6.38408	1.56619	3362.77	3628.19	Akia	Metatonalite	65.1761	-51.5631	Gardiner et al., 2019 CMP
158	158_4	3035.95	27.8532	D	6.60057	0.280831	4.9e-05	0.000721	0.02399	1.8869	0.00012	Gardiner et al., 2019	0.280789	5e-05	-1.30152	1.78047	3298.86	3455.97	Akia	Metatonalite	65.1761	-51.5631	Gardiner et al., 2019 CMP
158	158_5	2998.87	26.0712	D	-8.16784	0.28084	4.1e-05	0.000815	0.0266	1.88674	0.00011	Gardiner et al., 2019	0.280793	4.2e-05	-2.03113	1.49546	3294.84	3470.47	Akia	Metatonalite	65.1761	-51.5631	Gardiner et al., 2019 CMP
158	158_6	3002.48	24.6122	I	0.0571387	0.28085	4.3e-05	0.000768	0.02492	1.88686	0.00016	Gardiner et al., 2019	0.280806	4.4e-05	-1.49542	1.56669	3277.65	3441.52	Akia	Metatonalite	65.1761	-51.5631	Gardiner et al., 2019 CMP
158	158_7	2852.07	27.3697	M	-0.713121	0.280826	3.8e-05	0.001292	0.0458	1.88702	0.00013	Gardiner et al., 2019	0.280755	3.8e-05	-6.83511	1.35257	3354.25	3641.36	Akia	Metatonalite	65.1761	-51.5631	Gardiner et al., 2019 CMP
158	158_8	2930.79	23.653	D	3.27744	0.28084	5e-05	0.001512	0.0524	1.88699	0.00011	Gardiner et al., 2019	0.280755	5e-05	-4.99443	1.78002	3354.54	3593.21	Akia	Metatonalite	65.1761	-51.5631	Gardiner et al., 2019 CMP
158	158_9	3001.04	23.9077	I	-3.25658	0.280853	4.9e-05	0.000668	0.02155	1.88685	0.00016	Gardiner et al., 2019	0.280815	5e-05	-1.2167	1.78032	3265.34	3423.88	Akia	Metatonalite	65.1761	-51.5631	Gardiner et al., 2019 CMP
158	158_11	2982.15	30.5561	P	3.5969	0.280847	4.5e-05	0.001516	0.0527	1.88702	0.00015	Gardiner et al., 2019	0.28076	4.6e-05	-3.5961	1.63782	3345.44	3550.18	Akia	Metatonalite	65.1761	-51.5631	Gardiner et al., 2019 CMP
158	158_12	3008.95	26.6971	I	-3.27623	0.28083	3.7e-05	0.001458	0.05156	1.88682	0.00012	Gardiner et al., 2019	0.280746	3.8e-05	-3.4779	1.35307	3363.31	3563.9	Akia	Metatonalite	65.1761	-51.5631	Gardiner et al., 2019 CMP
158	158_13	3001.76	24.6176	I	-2.01993	0.280842	4.2e-05	0.000644	0.0206	1.88683	0.00012	Gardiner et al., 2019	0.280805	4.2e-05	-1.54241	1.49547	3277.88	3443.74	Akia	Metatonalite	65.1761	-51.5631	Gardiner et al., 2019 CMP
158	158_14	3025.35	30.0622	I	2.1952	0.280832	5.3e-05	0.001019	0.03553	1.88701	0.00014	Gardiner et al., 2019	0.280773	5.4e-05	-2.1276	1.92285	3322.75	3496.69	Akia	Metatonalite	65.1761	-51.5631	Gardiner et al., 2019 CMP
158	158_15	2955.59	23.1925	P	1.3523	0.280855	4.1e-05	0.001081	0.0373	1.88687	0.00011	Gardiner et al., 2019	0.280794	4.2e-05	-3.03133	1.49531	3297.35	3496.21	Akia	Metatonalite	65.1761	-51.5631	Gardiner et al., 2019 CMP
173	173 - 1	3004.64	26.0226	D	2.97646	0.280868	3.24e-05	0.000577	0.0205	1.88672	0.00011	This work	0.280835	3.2e-05	-0.41223	1.13941	3238.02	3378.95	Akia	Metaleucogabbro	65.2938	-51.5956	Gardiner et al., 2019 CMP; Waterton et al., 2020 FiES
173	173 - 2	3000.31	48.1429	I	2.19511	0.280822	3.12e-05	0.000508	0.01809	1.88678	9.8e-05	This work	0.280793	3.2e-05	-2.00897	1.1394	3292.9	3470.27	Akia	Metaleucogabbro	65.2938	-51.5956	Gardiner et al., 2019 CMP; Waterton et al., 2020 FiES
173	173 - 3	3005.36	25.3038	I	1.49024	0.280962	2.88e-05	0.003148	0.1247	1.8869	0.0001	This work	0.28078	2.8e-05	-2.33192	0.996988	3331.59	3493.3	Akia	Metaleucogabbro	65.2938	-51.5956	Gardiner et al., 2019 CMP; Waterton et al., 2020 FiES
173	173 - 4	3008.95	25.9863	I	0.595128	0.280894	3.84e-05	0.002385	0.0919	1.8868	0.00016	This work	0.280756	3.8e-05	-3.1064	1.35307	3357.89	3541.92	Akia	Metaleucogabbro	65.2938	-51.5956	Gardiner et al., 2019 CMP; Waterton et al., 2020 FiES
173	173 - 5	3029.6	34.2084	D	2.8574	0.28083	3.12e-05	0.0004223	0.01456	1.88687	0.00011	This work	0.280805	3.2e-05	-0.865001	1.13948	3275.26	3425.18	Akia	Metaleucogabbro	65.2938	-51.5956	Gardiner et al., 2019 CMP; Waterton et al., 2020 FiES
173	173 - 6	2992.35	29.0017	I	1.45715	0.280859	3.6e-05	0.000786	0.02688	1.8869	0.00013	This work	0.280814	3.6e-05	-1.44548	1.2818	3267.22	3430.71	Akia	Metaleucogabbro	65.2938	-51.5956	Gardiner et al., 2019 CMP; Waterton et al., 2020 FiES
173	173 - 7	3007.51	28.8432	D	2.49725	0.280884	4.08e-05	0.001867	0.07158	1.88679	0.00011	This work	0.280776	4e-05	-2.42868	1.42428	3325.85	3500.7	Akia	Metaleucogabbro	65.2938	-51.5956	Gardiner et al., 2019 CMP; Waterton et al., 2020 FiES
173	173 - 8	3013.96	23.1096	I	0.478239	0.280966	3.24e-05	0.003333	0.1318	1.88678	0.00014	This work	0.280773	3.2e-05	-2.38659	1.13944	3342.76	3503.2	Akia	Metaleucogabbro	65.2938	-51.5956	Gardiner et al., 2019 CMP; Waterton et al., 2020 FiES
173	173 - 9	3000.31	26.7741	D	2.86397	0.280911	2.88e-05	0.002546	0.0992	1.88688	0.00013	This work	0.280764	2.8e-05	-3.02084	0.996976	3348.75	3530.18	Akia	Metaleucogabbro	65.2938	-51.5956	Gardiner et al., 2019 CMP; Waterton et al., 2020 FiES
238	238 - 1	2955.59	54.3495	I	3.92049	0.280837	4.2e-05	0.0003841	0.013642	1.88671	0.00014	This work	0.280815	4.2e-05	-2.26458	1.49531	3262.92	3450.79	Alanngua	Metacharnockite	65.4462	-52.5855	Olierook et al., 2021 SD
238	238 - 2	2997.42	40.3798	I	3.7991	0.280829	3.36e-05	0.0006344	0.023704	1.88676	9.4e-05	This work	0.280792	3.4e-05	-2.08599	1.21061	3294.24	3472.6	Alanngua	Metacharnockite	65.4462	-52.5855	Olierook et al., 2021 SD
238	238 - 3	2951.11	43.4582	I	2.47093	0.280823	4.32e-05	0.000491	0.0179	1.88674	0.00013	This work	0.280795	4.4e-05	-3.08301	1.5665	3290.16	3495.81	Alanngua	Metacharnockite	65.4462	-52.5855	Olierook et al., 2021 SD
238	238 - 4	2993.8	39.7319	D	4.59329	0.280834	4.08e-05	0.0003763	0.013311	1.88674	0.00013	This work	0.280812	4e-05	-1.46357	1.42423	3266.21	3432.91	Alanngua	Metacharnockite	65.4462	-52.5855	Olierook et al., 2021 SD
238	238 - 5	2993.08	49.7425	I	2.93086	0.280844	3.36e-05	0.0004375	0.01538	1.8869	0.00011	This work	0.280819	3.4e-05	-1.24969	1.21059	3258.13	3419.66	Alanngua	Metacharnockite	65.4462	-52.5855	Olierook et al., 2021 SD
238	238 - 6	3040.17	45.1301	I	4.4614	0.280818	3.12e-05	0.00026897	0.009399	1.88688	0.00011	This work	0.280802	3.2e-05	-0.726833	1.13951	3278.31	3425.18	Alanngua	Metacharnockite	65.4462	-52.5855	Olierook et al., 2021 SD
238	238 - 7	2997.42	35.3843	I	3.59296	0.280828	2.88e-05	0.000701	0.02474	1.88683	0.00011	This work	0.280788	2.8e-05	-2.25809	0.99697	3301.14	3482.79	Alanngua	Metacharnockite	65.4462	-52.5855	Olierook et al., 2021 SD
238	238 - 8	3010.38	57.0479	I	4.22695	0.280835	2.76e-05	0.000292	0.01025	1.88684	0.00012	This work	0.280818	2.8e-05	-0.867174	0.997	3257.97	3410.4	Alanngua	Metacharnockite	65.4462	-52.5855	Olierook et al., 2021 SD
238	238 - 9	2836.77	49.0897	D	4.8202	0.280786	4.44e-05	0.0003899	0.01391	1.88684	0.00011	This work	0.280765	4.4e-05	-6.85877	1.56607	3330.27	3630.98	Alanngua	Metacharnockite	65.4462	-52.5855	Olierook et al., 2021 SD
238	238 - 10	3051.35	53.0968	D	6.74561	0.280807	3.36e-05	0.0002024	0.007002	1.88697	0.0001	This work	0.280795	3.4e-05	-0.717277	1.21076	3287.18	3433.29	Alanngua	Metacharnockite	65.4462	-52.5855	Olierook et al., 2021 SD
311	311 - 2	3008.95	30.9578	D	3.90748	0.280852	3.12e-05	0.00058	0.02127	1.88688	0.00011	This work	0.280818	3.2e-05	-0.888016	1.13942	3259.37	3410.52	Akia	Metagranite	64.9547	-52.1324	Steenfelt et al., 2020 PR
311	311 - 3	3008.23	27.4144	D	4.80337	0.280873	3.36e-05	0.000844	0.0303	1.88688	0.0001	This work	0.280824	3.4e-05	-0.699989	1.21064	3253.48	3398.81	Akia	Metagranite	64.9547	-52.1324	Steenfelt et al., 2020 PR
311	311 - 4	2995.25	35.4169	X	2.86424	0.280869	2.76e-05	0.000635	0.0227	1.88692	0.00013	This work	0.280832	2.8e-05	-0.7133	0.996965	3241.47	3389.54	Akia	Metagranite	64.9547	-52.1324	Steenfelt et al., 2020 PR
311	311 - 5	2884.55	34.0456	I	2.91086	0.280833	2.88e-05	0.0005385	0.019157	1.88672	0.00011	This work	0.280803	2.8e-05	-4.36658	0.996704	3280.96	3520.4	Akia	Metagranite	64.9547	-52.1324	Steenfelt et al., 2020 PR
311	311 - 7	3009.67	26.6907	X	-1.56525	0.280883	3e-05	0.000705	0.0238	1.88679	0.00011	This work	0.280842	3e-05	-0.0248012	1.06821	3228.72	3359.86	Akia	Metagranite	64.9547	-52.1324	Steenfelt et al., 2020 PR
311	311 - 8	3005.36	29.5775	D	7.74625	0.280856	3.36e-05	0.000914	0.0335	1.88684	0.00012	This work	0.280803	3.4e-05	-1.51535	1.21063	3281.92	3444.93	Akia	Metagranite	64.9547	-52.1324	Steenfelt et al., 2020 PR
507	507 - 1	3007.51	33.8147	D	3.86162	0.280832	2.04e-05	0.000362	0.01288	1.88686	0.00014	This work	0.280811	2e-05	-1.18516	0.712138	3267.66	3427.03	Akia	Dunite	64.9636	-52.1421	Olierook et al., 2021 SD
507	507 - 2	3009.67	33.7848	D	4.14935	0.280819	3.72e-05	0.000769	0.02681	1.88689	9.8e-05	This work	0.280775	3.8e-05	-2.43537	1.35307	3318.78	3502.76	Akia	Dunite	64.9636	-52.1421	Olierook et al., 2021 SD
507	507 - 3	3011.82	33.7549	D	5.63162	0.280844	3.24e-05	0.000671	0.02371	1.88685	8.6e-05	This work	0.280805	3.2e-05	-1.29374	1.13943	3277.49	3436.8	Akia	Dunite	64.9636	-52.1421	Olierook et al., 2021 SD
507	507 - 4	3018.96	30.1345	D	4.60818	0.280848	3.96e-05	0.00068	0.02403	1.88684	0.00011	This work	0.280809	4e-05	-1.00452	1.42431	3272.95	3425.19	Akia	Dunite	64.9636	-52.1421	Olierook et al., 2021 SD
507	507 - 6	3020.38	35.7453	D	3.68596	0.280835	3.12e-05	0.000384	0.01359	1.88671	7.7e-05	This work	0.280813	3.2e-05	-0.823026	1.13946	3265.54	3415.54	Akia	Dunite	64.9636	-52.1421	Olierook et al., 2021 SD
507	507 - 7	2990.17	36.2111	D	3.42802	0.280839	3.48e-05	0.0004707	0.016952	1.88674	0.00011	This work	0.280812	3.4e-05	-1.5633	1.21059	3267.44	3436.01	Akia	Dunite	64.9636	-52.1421	Olierook et al., 2021 SD
507	507 - 8	3013.25	30.1992	D	3.29449	0.280845	3e-05	0.00079	0.02786	1.88676	0.00012	This work	0.280799	3e-05	-1.4702	1.06822	3286.11	3448.37	Akia	Dunite	64.9636	-52.1421	Olierook et al., 2021 SD
507	507 - 10	2995.98	25.3782	D	-3.39101	0.280865	3e-05	0.000779	0.0248	1.88678	0.00012	This work	0.28082	3e-05	-1.13391	1.06818	3258.69	3415.05	Akia	Dunite	64.9636	-52.1421	Olierook et al., 2021 SD
565	565 - 1	3015.39	30.8814	D	2.34542	0.28084	3.48e-05	0.00046753	0.016449	1.88681	0.00011	Gardiner et al., 2019	0.280813	3.4e-05	-0.933805	1.21066	3265.87	3418.23	Akia	Metanorite	65.0812	-51.9219	Waterton et al., 2020 FiES
565	565 - 3	3048.56	36.6964	D	5.07517	0.280816	3.6e-05	0.0005	0.0165	1.88689	0.00011	Gardiner et al., 2019	0.280787	3.6e-05	-1.08298	1.28197	3300.12	3452.8	Akia	Metanorite	65.0812	-51.9219	Waterton et al., 2020 FiES
565	565 - 4	3001.76	26.7612	I	1.60284	0.280819	2.76e-05	0.0002729	0.008967	1.88687	9.1e-05	Gardiner et al., 2019	0.280803	2.8e-05	-1.59969	0.99698	3277.33	3447.14	Akia	Metanorite	65.0812	-51.9219	Waterton et al., 2020 FiES
565	565 - 5	3054.83	33.1669	D	5.12169	0.280821	4.32e-05	0.000425	0.01277	1.88686	0.00016	Gardiner et al., 2019	0.280796	4.4e-05	-0.602251	1.56688	3287.3	3429.17	Akia	Metanorite	65.0812	-51.9219	Waterton et al., 2020 FiES
565	565 - 7	3005.36	40.2334	D	3.75156	0.280824	4.2e-05	0.000392	0.0122	1.88688	0.00014	Gardiner et al., 2019	0.280801	4.2e-05	-1.58205	1.49548	3280.63	3448.88	Akia	Metanorite	65.0812	-51.9219	Waterton et al., 2020 FiES
704	704 - 1	2693.74	28.0234	D	3.39902	0.280801	3.24e-05	0.000307	0.01015	1.88682	8.9e-05	Gardiner et al., 2019	0.280785	3.2e-05	-9.49304	1.13858	3303.7	3676.82	Alanngua	Pegmatite	65.1302	-52.4216	Gardiner et al., 2019 CMP
704	704 - 2	2742.16	27.5656	I	2.96351	0.280846	3.36e-05	0.0002771	0.009792	1.8868	0.00011	Gardiner et al., 2019	0.280831	3.4e-05	-6.71021	1.20988	3242.35	3549.45	Alanngua	Pegmatite	65.1302	-52.4216	Gardiner et al., 2019 CMP
704	704 - 3	2715.95	26.9385	I	2.32585	0.280789	3.12e-05	0.000421	0.01435	1.88688	0.00011	Gardiner et al., 2019	0.280767	3.2e-05	-9.6148	1.13864	3328.95	3701.02	Alanngua	Pegmatite	65.1302	-52.4216	Gardiner et al., 2019 CMP
704	704 - 4	2722.99	30.3505	I	1.54509	0.280822	2.52e-05	0.0003238	0.011145	1.88695	0.00011	Gardiner et al., 2019	0.280805	2.6e-05	-8.09718	0.925159	3277.6	3616.77	Alanngua	Pegmatite	65.1302	-52.4216	Gardiner et al., 2019 CMP
704	704 - 5	2729.12	28.5525	I	0.786399	0.280865	2.52e-05	0.0003296	0.01139	1.88671	9e-05	Gardiner et al., 2019	0.280848	2.6e-05	-6.43545	0.925173	3221.74	3523.15	Alanngua	Pegmatite	65.1302	-52.4216	Gardiner et al., 2019 CMP
704	704 - 6	2723.87	28.6051	I	1.26473	0.280827	3.24e-05	0.000207	0.00685	1.88678	8.8e-05	Gardiner et al., 2019	0.280816	3.2e-05	-7.68206	1.13866	3261.45	3592.89	Alanngua	Pegmatite	65.1302	-52.4216	Gardiner et al., 2019 CMP
704	704 - 8	2728.24	32.0207	I	2.7815	0.28086	3.12e-05	0.000253	0.00874	1.88678	0.00011	Gardiner et al., 2019	0.280847	3.2e-05	-6.49124	1.13867	3222.07	3525.78	Alanngua	Pegmatite	65.1302	-52.4216	Gardiner et al., 2019 CMP
704	704 - 9	2748.21	27.5094	D	4.26621	0.280854	2.76e-05	0.0003487	0.01227	1.88687	0.0001	Gardiner et al., 2019	0.280836	2.8e-05	-6.41886	0.996384	3237.72	3536.85	Alanngua	Pegmatite	65.1302	-52.4216	Gardiner et al., 2019 CMP
704	704 - 10	2749.07	28.3544	D	3.14531	0.280847	3e-05	0.0001946	0.00684	1.88689	8.8e-05	Gardiner et al., 2019	0.280837	3e-05	-6.35914	1.06756	3234.32	3533.98	Alanngua	Pegmatite	65.1302	-52.4216	Gardiner et al., 2019 CMP
704	704 - 12	2710.66	30.4897	I	1.42676	0.280843	3e-05	0.000305	0.01015	1.88677	8.4e-05	Gardiner et al., 2019	0.280827	3e-05	-7.60187	1.06746	3248.56	3578	Alanngua	Pegmatite	65.1302	-52.4216	Gardiner et al., 2019 CMP
704	704 - 13	2715.95	29.5573	I	2.09002	0.280848	3e-05	0.000288	0.01014	1.88682	0.00011	Gardiner et al., 2019	0.280833	3e-05	-7.26927	1.06747	3240.62	3562.39	Alanngua	Pegmatite	65.1302	-52.4216	Gardiner et al., 2019 CMP
221	221 - 1	2985.88	16.722	P	-0.484996	0.280767	6.9e-05	0.00261	0.094	1.88685	0.00024	Gardiner et al., 2019	0.280617	7e-05	-8.59366	2.49236	3554.3	3847.85	Akia	Metadiorite	64.9703	-52.2985	Gardiner et al., 2019 CMP
221	221 - 2	2940.61	20.2553	D	2.65635	0.280848	9.2e-05	0.001407	0.0523	1.88715	0.00033	Gardiner et al., 2019	0.280769	9.2e-05	-4.2775	3.27532	3334.64	3558.39	Akia	Metadiorite	64.9703	-52.2985	Gardiner et al., 2019 CMP
221	221 - 3	2955.59	17.823	P	7.10255	0.280849	7.9e-05	0.00263	0.099	1.88674	0.00026	Gardiner et al., 2019	0.2807	8e-05	-6.3736	2.8482	3442.46	3693.77	Akia	Metadiorite	64.9703	-52.2985	Gardiner et al., 2019 CMP
221	221 - 4	2984.35	16.7401	P	-1.11896	0.280843	6.1e-05	0.00205	0.0762	1.88656	0.0002	Gardiner et al., 2019	0.280726	6.2e-05	-4.77855	2.20751	3398.02	3621.77	Akia	Metadiorite	64.9703	-52.2985	Gardiner et al., 2019 CMP
221	221 - 5	3067.27	31.4889	X	2.7365	0.280872	6.5e-05	0.003242	0.1242	1.88666	0.0002	Gardiner et al., 2019	0.280681	6.6e-05	-4.40794	2.35039	3467.35	3663.9	Akia	Metadiorite	64.9703	-52.2985	Gardiner et al., 2019 CMP
221	221 - 6	2974.82	17.5832	P	-5.39568	0.280791	7.1e-05	0.001776	0.0654	1.88682	0.00019	Gardiner et al., 2019	0.28069	7.2e-05	-6.28382	2.5635	3444.23	3703.29	Akia	Metadiorite	64.9703	-52.2985	Gardiner et al., 2019 CMP
221	221 - 7	2977.76	17.5469	P	-2.59959	0.280814	6.6e-05	0.00225	0.0839	1.88679	0.00022	Gardiner et al., 2019	0.280685	6.6e-05	-6.36411	2.34989	3455.89	3710.28	Akia	Metadiorite	64.9703	-52.2985	Gardiner et al., 2019 CMP
221	221 - 8	2986.53	26.118	P	0.174982	0.280897	7.8e-05	0.003638	0.1411	1.8867	0.00027	Gardiner et al., 2019	0.280688	7.8e-05	-6.04956	2.7772	3469.46	3698.49	Akia	Metadiorite	64.9703	-52.2985	Gardiner et al., 2019 CMP
221	221 - 9	2979.23	16.8006	P	-3.58392	0.280829	7.8e-05	0.003834	0.1436	1.88668	0.0002	Gardiner et al., 2019	0.28061	7.8e-05	-9.0236	2.77715	3585.8	3868.03	Akia	Metadiorite	64.9703	-52.2985	Gardiner et al., 2019 CMP
221	221 - 10	2979.81	16.7937	P	-0.322481	0.280832	6.8e-05	0.002539	0.0988	1.8868	0.00022	Gardiner et al., 2019	0.280687	6.8e-05	-6.26672	2.42111	3457.63	3706.12	Akia	Metadiorite	64.9703	-52.2985	Gardiner et al., 2019 CMP
221	221 - 11	2951.11	17.8793	P	-5.87969	0.280807	6.9e-05	0.00147	0.0505	1.88671	0.0002	Gardiner et al., 2019	0.280724	7e-05	-5.62692	2.49215	3395.34	3646.25	Akia	Metadiorite	64.9703	-52.2985	Gardiner et al., 2019 CMP
221	221 - 12	2883.77	17.9672	P	4.78909	0.28084	6.7e-05	0.001642	0.0582	1.88675	0.00023	Gardiner et al., 2019	0.280749	6.8e-05	-6.30841	2.42056	3365.91	3634.63	Akia	Metadiorite	64.9703	-52.2985	Gardiner et al., 2019 CMP
221	221 - 13	2977.32	16.8232	P	-4.58722	0.28078	8.1e-05	0.003228	0.122	1.88695	0.00022	Gardiner et al., 2019	0.280595	8.2e-05	-9.57474	2.91956	3595.72	3898.97	Akia	Metadiorite	64.9703	-52.2985	Gardiner et al., 2019 CMP
221	221 - 14	2990.9	31.7917	I	2.86017	0.280746	7.2e-05	0.000813	0.0305	1.88652	0.00023	Gardiner et al., 2019	0.280699	7.2e-05	-5.55761	2.5636	3419.16	3672.82	Akia	Metadiorite	64.9703	-52.2985	Gardiner et al., 2019 CMP
221	221 - 15	2985.08	17.4567	P	-4.7547	0.280795	6.1e-05	0.00193	0.0696	1.88682	0.00025	Gardiner et al., 2019	0.280684	6.2e-05	-6.22653	2.20751	3452.72	3707.8	Akia	Metadiorite	64.9703	-52.2985	Gardiner et al., 2019 CMP
221	221 - 16	2970.41	16.9053	P	-1.82433	0.280852	6.6e-05	0.001494	0.0545	1.88689	0.00022	Gardiner et al., 2019	0.280767	6.6e-05	-3.63814	2.34985	3336.78	3543.59	Akia	Metadiorite	64.9703	-52.2985	Gardiner et al., 2019 CMP
235	235 - 1	2993.08	20.2413	I	-1.63159	0.28087	8.9e-05	0.00139	0.0505	1.88661	0.00027	Gardiner et al., 2019	0.28079	9e-05	-2.27306	3.20451	3303.57	3480.31	Alanngua	Metatonalite	65.2275	-52.4884	Gardiner et al., 2019 CMP
235	235 - 2	2963.76	19.1926	P	0.244933	0.280898	8.8e-05	0.00092	0.0331	1.88681	0.00023	Gardiner et al., 2019	0.280846	8.8e-05	-0.987675	3.13308	3226.54	3381.39	Alanngua	Metatonalite	65.2275	-52.4884	Gardiner et al., 2019 CMP
235	235 - 3	2979.23	18.9846	D	3.00407	0.280881	7.3e-05	0.001589	0.0542	1.88685	0.00025	Gardiner et al., 2019	0.28079	7.4e-05	-2.60019	2.63474	3305.81	3488.97	Alanngua	Metatonalite	65.2275	-52.4884	Gardiner et al., 2019 CMP
235	235 - 4	2993.08	17.3585	I	-1.33583	0.280958	0.0001	0.00323	0.1227	1.88681	0.00025	Gardiner et al., 2019	0.280772	0.0001	-2.90498	3.56057	3344.69	3517.73	Alanngua	Metatonalite	65.2275	-52.4884	Gardiner et al., 2019 CMP
235	235 - 5	2983.62	21.1017	D	4.75356	0.280953	8.3e-05	0.00363	0.1335	1.88684	0.00027	Gardiner et al., 2019	0.280745	8.4e-05	-4.10079	2.99081	3388.7	3581.15	Alanngua	Metatonalite	65.2275	-52.4884	Gardiner et al., 2019 CMP
235	235 - 6	3016.11	19.2066	D	4.54533	0.280842	7.3e-05	0.00096	0.0353	1.8869	0.00022	Gardiner et al., 2019	0.280786	7.4e-05	-1.86173	2.63496	3304.42	3473.78	Alanngua	Metatonalite	65.2275	-52.4884	Gardiner et al., 2019 CMP
235	235 - 7	2989.45	18.8485	I	0.122943	0.280813	8e-05	0.00111	0.0411	1.88674	0.00029	Gardiner et al., 2019	0.280749	8e-05	-3.81253	2.84843	3355.9	3568.61	Alanngua	Metatonalite	65.2275	-52.4884	Gardiner et al., 2019 CMP
235	235 - 8	3008.95	18.5911	I	-1.22914	0.28092	0.00011	0.00235	0.089	1.88681	0.00033	Gardiner et al., 2019	0.280784	0.00011	-2.1086	3.91677	3318.86	3482.86	Alanngua	Metatonalite	65.2275	-52.4884	Gardiner et al., 2019 CMP
235	235 - 9	2934.57	21.8425	P	2.7381	0.28082	6.3e-05	0.00134	0.0477	1.88663	0.00027	Gardiner et al., 2019	0.280745	6.4e-05	-5.27636	2.27845	3366.47	3612.79	Alanngua	Metatonalite	65.2275	-52.4884	Gardiner et al., 2019 CMP
235	235 - 10	2972.91	16.8755	I	-1.04574	0.280919	9.7e-05	0.00285	0.1075	1.88644	0.00026	Gardiner et al., 2019	0.280756	9.8e-05	-3.95166	3.48919	3365	3564.07	Alanngua	Metatonalite	65.2275	-52.4884	Gardiner et al., 2019 CMP
235	235 - 11	3007.51	17.8964	I	1.89968	0.280802	8.3e-05	0.000868	0.0317	1.88689	0.00026	Gardiner et al., 2019	0.280752	8.4e-05	-3.29397	2.99098	3349.73	3551.91	Alanngua	Metatonalite	65.2275	-52.4884	Gardiner et al., 2019 CMP
235	235 - 12	2988.21	16.6946	I	-1.99897	0.280963	8e-05	0.003205	0.121	1.88669	0.00025	Gardiner et al., 2019	0.280779	8e-05	-2.77979	2.84842	3335.34	3506.55	Alanngua	Metatonalite	65.2275	-52.4884	Gardiner et al., 2019 CMP
235	235 - 13	2984.35	17.4657	I	1.5759	0.280807	8.7e-05	0.00343	0.1319	1.88695	0.00033	Gardiner et al., 2019	0.28061	8.8e-05	-8.87571	3.13324	3577.34	3863.26	Alanngua	Metatonalite	65.2275	-52.4884	Gardiner et al., 2019 CMP
235	235 - 14	2961.53	17.7486	P	1.05246	0.280819	7.3e-05	0.002026	0.0725	1.88675	0.00029	Gardiner et al., 2019	0.280704	7.4e-05	-6.0899	2.63463	3428.67	3681.61	Alanngua	Metatonalite	65.2275	-52.4884	Gardiner et al., 2019 CMP
235	235 - 15	2982.89	17.4837	D	3.89742	0.281025	8e-05	0.003	0.1121	1.88656	0.0002	Gardiner et al., 2019	0.280853	8e-05	-0.267987	2.84839	3229.56	3353.51	Alanngua	Metatonalite	65.2275	-52.4884	Gardiner et al., 2019 CMP
235	235 - 16	3006.8	20.7599	I	3.42833	0.28077	6.5e-05	0.000933	0.034	1.88685	0.00021	Gardiner et al., 2019	0.280716	6.6e-05	-4.58356	2.35005	3397.81	3627.58	Alanngua	Metatonalite	65.2275	-52.4884	Gardiner et al., 2019 CMP
235	235 - 17	2981.42	18.2286	D	-1.48872	0.280811	7.2e-05	0.00198	0.0714	1.88689	0.00026	Gardiner et al., 2019	0.280698	7.2e-05	-5.84001	2.56354	3435.43	3682.18	Alanngua	Metatonalite	65.2275	-52.4884	Gardiner et al., 2019 CMP
235	235 - 18	3000.1	16.5552	I	0.897145	0.280933	7.3e-05	0.002962	0.112	1.88706	0.00031	Gardiner et al., 2019	0.280762	7.4e-05	-3.09556	2.63487	3355.55	3534.44	Alanngua	Metatonalite	65.2275	-52.4884	Gardiner et al., 2019 CMP
235	235 - 19	3002.77	16.5241	I	-0.498625	0.280953	9.5e-05	0.00352	0.1284	1.88685	0.00032	Gardiner et al., 2019	0.28075	9.6e-05	-3.47164	3.41822	3378.46	3558.75	Alanngua	Metatonalite	65.2275	-52.4884	Gardiner et al., 2019 CMP
231	231 - 1	656.767	133.162	I	18.6605	0.282492	8e-05	5.19e-06	0.000192	1.88669	0.00022	This work	0.282492	8e-05	4.30181	2.83316	1036.44	1274.27	Alanngua	Metaperidotite	65.0268	-52.4757	Olierook et al., 2021 SD
231	231 - 2	3112.66	19.9264	D	7.49298	0.28094	7.5e-05	0.003426	0.1183	1.88695	0.00018	This work	0.280735	7.6e-05	-1.40813	2.7068	3388.24	3521.75	Alanngua	Metaperidotite	65.0268	-52.4757	Olierook et al., 2021 SD
231	231 - 3	2998.87	20.1588	X	2.48917	0.280826	6.8e-05	0.000428	0.01531	1.88691	0.00024	This work	0.280801	6.8e-05	-1.7361	2.42122	3280.99	3452.99	Alanngua	Metaperidotite	65.0268	-52.4757	Olierook et al., 2021 SD
231	231 - 4	3017.53	21.3111	D	-1.9908	0.280839	7.7e-05	0.000646	0.0203	1.88693	0.00032	This work	0.280802	7.8e-05	-1.28783	2.7774	3282	3440.88	Alanngua	Metaperidotite	65.0268	-52.4757	Olierook et al., 2021 SD
530	530 - 1	3002.48	18.6761	D	5.49015	0.280828	6.6e-05	0.000426	0.01325	1.88676	0.00031	This work	0.280803	6.6e-05	-1.57665	2.35003	3278.19	3446.33	Akia	Metadiorite	65.1772	-51.9856	Gardiner et al., 2019 CMP
530	530 - 2	2999.59	18.7142	D	-4.73668	0.280845	6.3e-05	0.000665	0.0204	1.88701	0.00024	This work	0.280807	6.4e-05	-1.52881	2.2788	3275.66	3441.26	Akia	Metadiorite	65.1772	-51.9856	Gardiner et al., 2019 CMP
530	530 - 3	2997.42	18.7428	I	-1.14856	0.280813	6.1e-05	0.0003139	0.00938	1.88667	0.00024	This work	0.280795	6.2e-05	-1.99886	2.20758	3288.57	3467.43	Akia	Metadiorite	65.1772	-51.9856	Gardiner et al., 2019 CMP
530	530 - 4	2991.63	19.5408	I	0.00596007	0.280932	9.8e-05	0.00238	0.0781	1.88696	0.00026	This work	0.280795	9.8e-05	-2.12321	3.48935	3304.93	3470.31	Akia	Metadiorite	65.1772	-51.9856	Gardiner et al., 2019 CMP
530	530 - 5	3003.2	17.951	I	-0.24207	0.280877	7.3e-05	0.00108	0.037	1.88661	0.00026	This work	0.280815	7.4e-05	-1.1581	2.63488	3267.88	3422.08	Akia	Metadiorite	65.1772	-51.9856	Gardiner et al., 2019 CMP
530	530 - 6	2985.08	18.9066	I	-3.5147	0.280851	7e-05	0.00124	0.0421	1.88647	0.00024	This work	0.28078	7e-05	-2.8246	2.49235	3316.24	3506.78	Akia	Metadiorite	65.1772	-51.9856	Gardiner et al., 2019 CMP
530	530 - 7	3006.08	20.7704	I	0.986096	0.28086	0.00011	0.00147	0.0502	1.88633	0.00031	This work	0.280775	0.00011	-2.49926	3.91675	3323.92	3503.77	Akia	Metadiorite	65.1772	-51.9856	Gardiner et al., 2019 CMP
530	530 - 8	2978.49	21.9054	D	5.98701	0.280926	6.7e-05	0.00131	0.0455	1.88662	0.00026	This work	0.280851	6.8e-05	-0.446429	2.4211	3221.45	3360.7	Akia	Metadiorite	65.1772	-51.9856	Gardiner et al., 2019 CMP
530	530 - 9	3001.76	18.6856	D	4.04785	0.28088	0.0001	0.0027	0.096	1.88661	0.0003	This work	0.280724	0.0001	-4.40922	3.56064	3405.78	3613.39	Akia	Metadiorite	65.1772	-51.9856	Gardiner et al., 2019 CMP
530	530 - 10	3020.38	23.3864	I	-0.0461068	0.280863	8.1e-05	0.000749	0.0249	1.88688	0.00026	This work	0.28082	8.2e-05	-0.579964	2.91986	3258.84	3401.12	Akia	Metadiorite	65.1772	-51.9856	Gardiner et al., 2019 CMP
530	530 - 11	2993.8	20.2309	D	-4.54207	0.280923	6.7e-05	0.000922	0.0311	1.88676	0.00022	This work	0.28087	6.8e-05	0.588383	2.42119	3193.41	3311.12	Akia	Metadiorite	65.1772	-51.9856	Gardiner et al., 2019 CMP
530	530 - 12	2991.63	19.5408	I	-2.08382	0.28077	7.4e-05	0.00161	0.0546	1.88662	0.00024	This work	0.280678	7.4e-05	-6.31644	2.63481	3457.7	3718.15	Akia	Metadiorite	65.1772	-51.9856	Gardiner et al., 2019 CMP
530	530 - 13	3013.25	19.9556	D	-4.51158	0.280814	8.6e-05	0.00148	0.0501	1.88681	0.00026	This work	0.280728	8.6e-05	-3.99584	3.06224	3386.79	3597.83	Akia	Metadiorite	65.1772	-51.9856	Gardiner et al., 2019 CMP
530	530 - 14	3024.65	19.7958	D	-2.02848	0.280817	7.3e-05	0.000652	0.02082	1.88656	0.00023	This work	0.280779	7.4e-05	-1.91878	2.63502	3311.55	3483.77	Akia	Metadiorite	65.1772	-51.9856	Gardiner et al., 2019 CMP
530	530 - 15	2987.99	18.8678	I	2.43588	0.280876	8.6e-05	0.00227	0.0797	1.88684	0.00031	This work	0.280746	8.6e-05	-3.97218	3.06205	3372.43	3576.93	Akia	Metadiorite	65.1772	-51.9856	Gardiner et al., 2019 CMP
530	530 - 16	2983.62	18.926	I	-0.398334	0.280854	8.6e-05	0.00332	0.1099	1.88654	0.00037	This work	0.280664	8.6e-05	-6.99339	3.06202	3500.19	3751.89	Akia	Metadiorite	65.1772	-51.9856	Gardiner et al., 2019 CMP
530	530 - 17	3011.1	20.697	D	-7.98723	0.28088	7.5e-05	0.000514	0.01689	1.88672	0.00025	This work	0.28085	7.6e-05	0.294817	2.70615	3217.04	3342	Akia	Metadiorite	65.1772	-51.9856	Gardiner et al., 2019 CMP
530	530 - 18	2992.35	20.9722	I	2.27678	0.280811	9.5e-05	0.00168	0.0579	1.8869	0.00023	This work	0.280714	9.6e-05	-4.9835	3.41814	3408.53	3640.05	Akia	Metadiorite	65.1772	-51.9856	Gardiner et al., 2019 CMP
530	530 - 19	2981.42	19.6818	I	-3.10533	0.281011	8e-05	0.00136	0.0426	1.88675	0.00035	This work	0.280933	8e-05	2.54453	2.84838	3111	3185.13	Akia	Metadiorite	65.1772	-51.9856	Gardiner et al., 2019 CMP
530	530 - 20	2993.08	21.6816	D	9.11195	0.280844	8.7e-05	0.00206	0.076	1.88662	0.00027	This work	0.280726	8.8e-05	-4.56984	3.1333	3397.55	3616.18	Akia	Metadiorite	65.1772	-51.9856	Gardiner et al., 2019 CMP
530	530 - 21	3005.36	18.6382	I	1.24648	0.280791	7.5e-05	0.000503	0.01674	1.88696	0.00023	This work	0.280762	7.6e-05	-2.98517	2.70611	3333.24	3531.97	Akia	Metadiorite	65.1772	-51.9856	Gardiner et al., 2019 CMP
534	534 - 1	2981.42	20.4082	D	4.04444	0.280824	8.6e-05	0.001787	0.06804	1.88666	0.00036	This work	0.280722	8.6e-05	-4.9838	3.06201	3400.43	3631.64	Akia	Granitic orthogneiss	65.186	-51.9866	Gardiner et al., 2019 CMP
534	534 - 2	2998.15	18.015	D	-6.89001	0.280858	8.7e-05	0.00214	0.0747	1.88691	0.00022	This work	0.280735	8.8e-05	-4.123	3.13334	3385.53	3593.69	Akia	Granitic orthogneiss	65.186	-51.9866	Gardiner et al., 2019 CMP
534	534 - 3	2993.08	17.3585	D	-6.15202	0.280855	7.6e-05	0.00097	0.0328	1.88659	0.00031	This work	0.280799	7.6e-05	-1.94769	2.70603	3287.96	3461.04	Akia	Granitic orthogneiss	65.186	-51.9866	Gardiner et al., 2019 CMP
534	534 - 4	3013.25	18.5348	I	-3.73578	0.280842	6.9e-05	0.000802	0.027	1.88686	0.00023	This work	0.280796	7e-05	-1.60175	2.49252	3291.1	3456.16	Akia	Granitic orthogneiss	65.186	-51.9866	Gardiner et al., 2019 CMP
534	534 - 5	3003.92	20.0872	I	2.38055	0.28087	9.4e-05	0.00108	0.034	1.88664	0.00029	This work	0.280808	9.4e-05	-1.39089	3.34702	3277.23	3436.44	Akia	Granitic orthogneiss	65.186	-51.9866	Gardiner et al., 2019 CMP
534	534 - 6	2987.26	22.4934	D	-4.5451	0.280847	7.7e-05	0.00115	0.0413	1.887	0.0003	This work	0.280781	7.8e-05	-2.7335	2.77721	3313.91	3503.08	Akia	Granitic orthogneiss	65.186	-51.9866	Gardiner et al., 2019 CMP
534	534 - 9	3011.1	18.5629	D	7.42147	0.280852	7e-05	0.00159	0.0542	1.88683	0.00039	This work	0.28076	7e-05	-2.91775	2.4925	3345.13	3532.42	Akia	Granitic orthogneiss	65.186	-51.9866	Gardiner et al., 2019 CMP
534	534 - 10	3005.36	19.3527	D	-4.93067	0.280837	8.2e-05	0.001131	0.0389	1.88683	0.00025	This work	0.280772	8.2e-05	-2.63781	2.91975	3325.65	3511.41	Akia	Granitic orthogneiss	65.186	-51.9866	Gardiner et al., 2019 CMP
534	534 - 11	3000.31	17.2702	D	-4.81704	0.280836	6.5e-05	0.000681	0.0205	1.88673	0.00025	This work	0.280797	6.6e-05	-1.86538	2.35002	3288.89	3461.76	Akia	Granitic orthogneiss	65.186	-51.9866	Gardiner et al., 2019 CMP
534	534 - 12	2986.53	18.8872	I	-3.25017	0.280826	7.4e-05	0.0004325	0.01551	1.88671	0.00022	This work	0.280801	7.4e-05	-2.03291	2.63478	3281.36	3461.02	Akia	Granitic orthogneiss	65.186	-51.9866	Gardiner et al., 2019 CMP
534	534 - 13	2995.25	19.491	D	-6.60023	0.280949	8.8e-05	0.00156	0.0531	1.8868	0.00034	This work	0.280859	8.8e-05	0.240904	3.13332	3211.28	3332.89	Akia	Granitic orthogneiss	65.186	-51.9866	Gardiner et al., 2019 CMP
534	534 - 14	2997.42	19.4612	I	-1.08135	0.280863	9.5e-05	0.00142	0.0518	1.88671	0.00022	This work	0.280781	9.6e-05	-2.48539	3.41818	3315.57	3496.25	Akia	Granitic orthogneiss	65.186	-51.9866	Gardiner et al., 2019 CMP
534	534 - 15	3006.08	20.7704	D	-2.48587	0.280821	7.6e-05	0.000582	0.0196	1.88688	0.00019	This work	0.280787	7.6e-05	-2.06263	2.70612	3300.4	3477.91	Akia	Granitic orthogneiss	65.186	-51.9866	Gardiner et al., 2019 CMP
407	407 - 2	2993.8	20.2309	I	3.68275	0.280887	8.1e-05	0.000771	0.0255	1.88692	0.00032	This work	0.280843	8.2e-05	-0.384353	2.91967	3228.85	3368.89	Akia	Mafic metatonalite	65.3463	-52.1392	Gardiner et al., 2019 CMP
407	407 - 4	3001.76	20.1179	I	3.38945	0.280776	8.8e-05	0.001092	0.0378	1.88687	0.00026	This work	0.280713	8.8e-05	-4.81194	3.13337	3403.69	3637.18	Akia	Mafic metatonalite	65.3463	-52.1392	Gardiner et al., 2019 CMP
407	407 - 5	2990.17	19.5609	I	5.93579	0.280945	8.6e-05	0.00165	0.0563	1.88682	0.00024	This work	0.28085	8.6e-05	-0.199914	3.06207	3224.26	3355.12	Akia	Mafic metatonalite	65.3463	-52.1392	Gardiner et al., 2019 CMP
407	407 - 6	2935.33	21.8309	P	5.1742	0.280857	9.4e-05	0.000966	0.0325	1.88697	0.00024	This work	0.280803	9.4e-05	-3.19198	3.34648	3284.96	3490.06	Akia	Mafic metatonalite	65.3463	-52.1392	Gardiner et al., 2019 CMP
407	407 - 7	2991.63	19.5408	I	8.2217	0.280841	9.1e-05	0.001142	0.0408	1.8869	0.00022	This work	0.280775	9.2e-05	-2.83125	3.27571	3321.24	3512.24	Akia	Mafic metatonalite	65.3463	-52.1392	Gardiner et al., 2019 CMP
407	407 - 8	2980.69	18.9651	I	3.0103	0.280867	8.9e-05	0.000834	0.0287	1.88703	0.00027	This work	0.280819	9e-05	-1.52737	3.20442	3260.61	3426.53	Akia	Mafic metatonalite	65.3463	-52.1392	Gardiner et al., 2019 CMP
407	407 - 9	3002.48	17.9601	I	-0.73669	0.280875	7.5e-05	0.00092	0.0307	1.8867	0.00026	This work	0.280822	7.6e-05	-0.917314	2.70609	3257.15	3407.24	Akia	Mafic metatonalite	65.3463	-52.1392	Gardiner et al., 2019 CMP
407	407 - 11	2994.53	20.9401	I	-3.78691	0.280858	8.2e-05	0.001139	0.0397	1.88709	0.0002	This work	0.280793	8.2e-05	-2.15361	2.91968	3298.26	3474.36	Akia	Mafic metatonalite	65.3463	-52.1392	Gardiner et al., 2019 CMP
407	407 - 12	2994.53	20.2206	I	-3.72043	0.280844	7.9e-05	0.001317	0.0453	1.88669	0.00027	This work	0.280768	8e-05	-3.01652	2.84847	3332.25	3525.45	Akia	Mafic metatonalite	65.3463	-52.1392	Gardiner et al., 2019 CMP
407	407 - 14	2988.72	21.026	I	8.83799	0.280936	8.2e-05	0.00087	0.0302	1.88675	0.00028	This work	0.280886	8.2e-05	1.04069	2.91964	3171.86	3280.29	Akia	Mafic metatonalite	65.3463	-52.1392	Gardiner et al., 2019 CMP
407	407 - 15	2986.53	18.1631	I	4.01484	0.280851	8.2e-05	0.00208	0.0747	1.88693	0.00029	This work	0.280732	8.2e-05	-4.50646	2.91962	3389.75	3607.38	Akia	Mafic metatonalite	65.3463	-52.1392	Gardiner et al., 2019 CMP
407	407 - 16	3003.2	20.0974	I	-2.30441	0.280877	7.8e-05	0.001229	0.0436	1.88686	0.00027	This work	0.280806	7.8e-05	-1.46407	2.77731	3280.45	3440.22	Akia	Mafic metatonalite	65.3463	-52.1392	Gardiner et al., 2019 CMP
407	407 - 17	3035.25	21.7454	X	7.60738	0.280826	7e-05	0.00072	0.0247	1.8869	0.0003	This work	0.280784	7e-05	-1.49377	2.49265	3305.38	3466.81	Akia	Mafic metatonalite	65.3463	-52.1392	Gardiner et al., 2019 CMP
407	407 - 18	2998.15	18.015	I	2.3291	0.280816	8.9e-05	0.00139	0.05	1.88646	0.00029	This work	0.280736	9e-05	-4.08103	3.20455	3376.21	3591.21	Akia	Mafic metatonalite	65.3463	-52.1392	Gardiner et al., 2019 CMP
407	407 - 19	2984.35	18.1911	I	0.374036	0.280807	7.5e-05	0.00245	0.091	1.8866	0.00027	This work	0.280667	7.6e-05	-6.87638	2.70598	3483.96	3745.55	Akia	Mafic metatonalite	65.3463	-52.1392	Gardiner et al., 2019 CMP
407	407 - 20	2984.35	18.1911	I	-0.875346	0.280868	7.6e-05	0.001109	0.0379	1.88672	0.00022	This work	0.280804	7.6e-05	-1.96866	2.70598	3282.35	3455.52	Akia	Mafic metatonalite	65.3463	-52.1392	Gardiner et al., 2019 CMP
407	407 - 21	2990.17	19.5609	I	-1.09733	0.280863	7.8e-05	0.001007	0.0337	1.88659	0.0003	This work	0.280805	7.8e-05	-1.8051	2.77723	3280.42	3450.34	Akia	Mafic metatonalite	65.3463	-52.1392	Gardiner et al., 2019 CMP
407	407 - 22	3005.36	18.6382	I	0.935403	0.280936	8.8e-05	0.001014	0.0356	1.88677	0.00033	This work	0.280877	8.8e-05	1.12769	3.13339	3183.59	3288.06	Akia	Mafic metatonalite	65.3463	-52.1392	Gardiner et al., 2019 CMP
407	407 - 23	3003.2	19.3821	I	0.512768	0.280795	6.8e-05	0.000944	0.033	1.88681	0.00023	This work	0.280741	6.8e-05	-3.79857	2.42125	3365.55	3578.41	Akia	Mafic metatonalite	65.3463	-52.1392	Gardiner et al., 2019 CMP
220	220 - 1	3222.87	20.8766	I	-3.88851	0.280818	9.4e-05	0.00166	0.0601	1.88688	0.00027	Gardiner et al., 2019	0.280715	9.4e-05	0.493797	3.34876	3397.28	3494.79	Akia	Metadiorite	64.9703	-52.2985	Gardiner et al., 2019 CMP
220	220 - 2	3229.64	20.7765	I	2.84622	0.280784	8e-05	0.002811	0.1047	1.88701	0.00028	Gardiner et al., 2019	0.280609	8e-05	-3.11343	2.85005	3549.83	3713.08	Akia	Metadiorite	64.9703	-52.2985	Gardiner et al., 2019 CMP
220	220 - 3	3241.24	24.2266	I	1.65977	0.280802	8.1e-05	0.001676	0.0575	1.88672	0.00024	Gardiner et al., 2019	0.280697	8.2e-05	0.30274	2.92138	3420.36	3520.38	Akia	Metadiorite	64.9703	-52.2985	Gardiner et al., 2019 CMP
220	220 - 4	3230.86	18.933	I	-1.60355	0.280831	7.6e-05	0.002732	0.1007	1.88669	0.00031	Gardiner et al., 2019	0.280661	7.6e-05	-1.23737	2.70756	3476.94	3603.34	Akia	Metadiorite	64.9703	-52.2985	Gardiner et al., 2019 CMP
220	220 - 5	3235.15	24.9373	I	-0.881416	0.280837	9.2e-05	0.00178	0.0631	1.88669	0.00026	Gardiner et al., 2019	0.280726	9.2e-05	1.18145	3.2776	3382.15	3463.63	Akia	Metadiorite	64.9703	-52.2985	Gardiner et al., 2019 CMP
220	220 - 6	3244.89	20.5526	I	1.35871	0.280774	8.7e-05	0.00213	0.0778	1.88689	0.0003	Gardiner et al., 2019	0.280641	8.8e-05	-1.62276	3.13517	3499.69	3636.98	Akia	Metadiorite	64.9703	-52.2985	Gardiner et al., 2019 CMP
220	220 - 7	3244.28	21.164	I	1.66707	0.280703	8.5e-05	0.00196	0.0715	1.88655	0.00027	Gardiner et al., 2019	0.280581	8.6e-05	-3.78758	3.06391	3580.7	3764.13	Akia	Metadiorite	64.9703	-52.2985	Gardiner et al., 2019 CMP
220	220 - 8	3221.02	23.3531	I	3.53584	0.280754	8.6e-05	0.00125	0.0442	1.88671	0.00028	Gardiner et al., 2019	0.280677	8.6e-05	-0.922626	3.06374	3447	3577.11	Akia	Metadiorite	64.9703	-52.2985	Gardiner et al., 2019 CMP
220	220 - 9	3235.15	22.5142	I	3.41625	0.280823	6.7e-05	0.00186	0.0679	1.88644	0.00028	Gardiner et al., 2019	0.280707	6.8e-05	0.505235	2.42258	3408.3	3503.66	Akia	Metadiorite	64.9703	-52.2985	Gardiner et al., 2019 CMP
220	220 - 10	3222.26	22.1095	I	-1.32109	0.280734	7.3e-05	0.001411	0.0508	1.8868	0.00024	Gardiner et al., 2019	0.280647	7.4e-05	-1.96258	2.63625	3488.22	3639.49	Akia	Metadiorite	64.9703	-52.2985	Gardiner et al., 2019 CMP
220	220 - 11	3210.49	23.5283	I	0.130937	0.280716	6.6e-05	0.001376	0.0479	1.88673	0.00021	Gardiner et al., 2019	0.280631	6.6e-05	-2.79418	2.35119	3509.2	3679.44	Akia	Metadiorite	64.9703	-52.2985	Gardiner et al., 2019 CMP
220	220 - 12	3209.25	25.3998	D	0.752936	0.280833	0.0001	0.00118	0.0412	1.88676	0.00029	Gardiner et al., 2019	0.28076	0.0001	1.77666	3.56239	3335.2	3408.2	Akia	Metadiorite	64.9703	-52.2985	Gardiner et al., 2019 CMP
220	220 - 13	3235.15	20.6954	I	0.166229	0.280869	7.8e-05	0.003	0.1121	1.88673	0.00026	Gardiner et al., 2019	0.280682	7.8e-05	-0.38464	2.77884	3448.85	3556.28	Akia	Metadiorite	64.9703	-52.2985	Gardiner et al., 2019 CMP
220	220 - 14	3231.48	20.7494	I	1.92302	0.280835	8.9e-05	0.002452	0.0928	1.88659	0.00031	Gardiner et al., 2019	0.280683	9e-05	-0.46116	3.20632	3445.47	3557.96	Akia	Metadiorite	64.9703	-52.2985	Gardiner et al., 2019 CMP
220	220 - 15	3223.49	19.6442	I	-0.267457	0.280826	8.8e-05	0.001064	0.0373	1.88649	0.0003	Gardiner et al., 2019	0.28076	8.8e-05	2.10977	3.13501	3334.6	3399.55	Akia	Metadiorite	64.9703	-52.2985	Gardiner et al., 2019 CMP
220	220 - 16	3224.11	31.2296	I	0.479687	0.280667	7e-05	0.000353	0.01161	1.88658	0.00025	Gardiner et al., 2019	0.280645	7e-05	-1.96897	2.49376	3482.74	3641.3	Akia	Metadiorite	64.9703	-52.2985	Gardiner et al., 2019 CMP
220	220 - 17	3228.41	28.0973	I	-1.5607	0.280721	8.4e-05	0.001007	0.0342	1.88659	0.00021	Gardiner et al., 2019	0.280658	8.4e-05	-1.39166	2.99255	3469.38	3610.55	Akia	Metadiorite	64.9703	-52.2985	Gardiner et al., 2019 CMP
220	220 - 18	3251.54	21.6542	I	1.52451	0.280785	8.1e-05	0.00242	0.0899	1.88678	0.00022	Gardiner et al., 2019	0.280634	8.2e-05	-1.72945	2.92145	3511.53	3648.44	Akia	Metadiorite	64.9703	-52.2985	Gardiner et al., 2019 CMP
220	220 - 19	3250.34	20.4732	D	8.02732	0.280866	7.7e-05	0.001956	0.0709	1.88656	0.00033	Gardiner et al., 2019	0.280744	7.8e-05	2.16398	2.77894	3358.22	3417.26	Akia	Metadiorite	64.9703	-52.2985	Gardiner et al., 2019 CMP
220	220 - 20	3230.25	19.5501	I	-0.0334498	0.280832	7.6e-05	0.00219	0.0817	1.88669	0.00029	Gardiner et al., 2019	0.280696	7.6e-05	-0.014767	2.70755	3425.7	3530.61	Akia	Metadiorite	64.9703	-52.2985	Gardiner et al., 2019 CMP
220	220 - 21	3229.02	21.3946	I	1.73867	0.28083	7.6e-05	0.00227	0.0838	1.88679	0.00027	Gardiner et al., 2019	0.280689	7.6e-05	-0.290341	2.70754	3435.72	3545.95	Akia	Metadiorite	64.9703	-52.2985	Gardiner et al., 2019 CMP
220	220 - 23	3225.34	20.8401	I	1.7119	0.280818	7.8e-05	0.00216	0.082	1.88656	0.00026	Gardiner et al., 2019	0.280684	7.8e-05	-0.556206	2.77877	3442.18	3558.81	Akia	Metadiorite	64.9703	-52.2985	Gardiner et al., 2019 CMP
220	220 - 25	3224.72	20.8492	I	0.997543	0.280756	9e-05	0.00188	0.0682	1.8867	0.00024	Gardiner et al., 2019	0.280639	9e-05	-2.15964	3.20627	3501.21	3653.03	Akia	Metadiorite	64.9703	-52.2985	Gardiner et al., 2019 CMP
220	220 - 26	3254.56	23.9985	D	6.78112	0.280769	9.5e-05	0.00212	0.0779	1.88695	0.00022	Gardiner et al., 2019	0.280636	9.6e-05	-1.56345	3.42026	3505.61	3640.98	Akia	Metadiorite	64.9703	-52.2985	Gardiner et al., 2019 CMP
220	220 - 27	3209.87	21.0702	D	1.29979	0.280791	7.2e-05	0.00246	0.091	1.8869	0.0003	Gardiner et al., 2019	0.280639	7.2e-05	-2.5215	2.56493	3506.99	3662.87	Akia	Metadiorite	64.9703	-52.2985	Gardiner et al., 2019 CMP
220	220 - 28	3246.71	22.9311	I	2.74774	0.280838	8.7e-05	0.00205	0.074	1.8866	0.0003	Gardiner et al., 2019	0.28071	8.8e-05	0.875926	3.13518	3404.86	3490.71	Akia	Metadiorite	64.9703	-52.2985	Gardiner et al., 2019 CMP
220	220 - 29	3219.17	27.0583	I	-1.99661	0.280791	7.1e-05	0.00136	0.0465	1.88667	0.00031	Gardiner et al., 2019	0.280707	7.2e-05	0.110419	2.56498	3407.16	3514.6	Akia	Metadiorite	64.9703	-52.2985	Gardiner et al., 2019 CMP
220	220 - 30	3224.11	20.8583	I	-1.11835	0.280795	6.5e-05	0.00148	0.0505	1.88678	0.0003	Gardiner et al., 2019	0.280703	6.6e-05	0.100067	2.35126	3412.38	3519.04	Akia	Metadiorite	64.9703	-52.2985	Gardiner et al., 2019 CMP
220	220 - 31	3154.68	21.269	D	2.63352	0.280812	8.4e-05	0.001438	0.0456	1.88686	0.00033	Gardiner et al., 2019	0.280725	8.4e-05	-0.777519	2.99202	3385.79	3517.04	Akia	Metadiorite	64.9703	-52.2985	Gardiner et al., 2019 CMP
307	307 - 2	3008.23	20.0263	D	-0.222099	0.280847	6.6e-05	0.000831	0.0279	1.88659	0.00033	This work	0.280799	6.6e-05	-1.59903	2.35006	3286.9	3452.12	Akia	Metatonalite	65.3259	-52.3047	Gardiner et al., 2019 CMP
307	307 - 4	2977.76	20.4608	D	2.95632	0.280828	6.6e-05	0.000342	0.01022	1.88655	0.00025	This work	0.280808	6.6e-05	-1.98196	2.34989	3271.25	3451.21	Akia	Metatonalite	65.3259	-52.3047	Gardiner et al., 2019 CMP
307	307 - 6	3018.96	21.9966	X	1.81262	0.280824	8.8e-05	0.0002982	0.00945	1.887	0.00022	This work	0.280807	8.8e-05	-1.07083	3.13349	3272.87	3429.12	Akia	Metatonalite	65.3259	-52.3047	Gardiner et al., 2019 CMP
307	307 - 7	2986.53	20.3348	I	3.33794	0.280976	9.5e-05	0.000788	0.0269	1.8868	0.00025	This work	0.280931	9.6e-05	2.58204	3.41809	3112.06	3186.87	Akia	Metatonalite	65.3259	-52.3047	Gardiner et al., 2019 CMP
307	307 - 9	3018.25	18.4696	X	0.552408	0.280862	7.7e-05	0.001502	0.0521	1.88677	0.00029	This work	0.280775	7.8e-05	-2.21923	2.77741	3323.98	3496.61	Akia	Metatonalite	65.3259	-52.3047	Gardiner et al., 2019 CMP
307	307 - 11	3001.04	18.6951	D	0.0225697	0.280877	7.4e-05	0.001492	0.0502	1.88698	0.00025	This work	0.280791	7.4e-05	-2.05295	2.63487	3302.88	3473.44	Akia	Metatonalite	65.3259	-52.3047	Gardiner et al., 2019 CMP
307	307 - 13	2990.9	18.8292	D	-4.55069	0.280789	9.9e-05	0.001322	0.0451	1.88711	0.00026	This work	0.280713	0.0001	-5.06737	3.56055	3406.49	3643.88	Akia	Metatonalite	65.3259	-52.3047	Gardiner et al., 2019 CMP
307	307 - 14	2914.01	25.2034	D	5.28633	0.280937	8.8e-05	0.001503	0.0521	1.8869	0.00035	This work	0.280853	8.8e-05	-1.90109	3.13272	3222.75	3397.05	Akia	Metatonalite	65.3259	-52.3047	Gardiner et al., 2019 CMP
307	307 - 20	3004.64	19.3625	D	0.371558	0.280933	8.2e-05	0.000668	0.0223	1.88655	0.00025	This work	0.280894	8.2e-05	1.71524	2.91975	3159.51	3252.56	Akia	Metatonalite	65.3259	-52.3047	Gardiner et al., 2019 CMP
307	307 - 21	3008.23	18.6005	D	1.05702	0.280825	8.9e-05	0.001071	0.03669	1.88699	0.00031	This work	0.280763	9e-05	-2.87607	3.20463	3336.53	3527.74	Akia	Metatonalite	65.3259	-52.3047	Gardiner et al., 2019 CMP
307	307 - 23	3041.57	29.2906	D	8.4865	0.280858	7.2e-05	0.001121	0.0388	1.88686	0.00023	This work	0.280793	7.2e-05	-1.04233	2.5639	3296.73	3444.97	Akia	Metatonalite	65.3259	-52.3047	Gardiner et al., 2019 CMP
307	307 - 24	3118.64	39.5454	D	21.0683	0.280838	8.5e-05	0.00116	0.0424	1.88677	0.00028	This work	0.280768	8.6e-05	-0.0750665	3.063	3326.8	3447.47	Akia	Metatonalite	65.3259	-52.3047	Gardiner et al., 2019 CMP
307	307 - 25	2945.87	31.3302	D	7.94256	0.280883	9.6e-05	0.000798	0.02622	1.88682	0.00024	This work	0.280838	9.6e-05	-1.6867	3.41777	3236.39	3409	Akia	Metatonalite	65.3259	-52.3047	Gardiner et al., 2019 CMP
307	307 - 27	2971.88	20.5457	I	0.435379	0.280912	7.2e-05	0.001052	0.0351	1.8866	0.00025	This work	0.280852	7.2e-05	-0.570836	2.56348	3218.78	3362.95	Akia	Metatonalite	65.3259	-52.3047	Gardiner et al., 2019 CMP
307	307 - 28	3012.53	19.9657	D	0.189244	0.280792	6.9e-05	0.002117	0.0757	1.88666	0.00035	This work	0.28067	7e-05	-6.10763	2.49251	3473.87	3721.94	Akia	Metatonalite	65.3259	-52.3047	Gardiner et al., 2019 CMP
307	307 - 29	3031.02	18.304	D	4.77009	0.280834	6.9e-05	0.001281	0.04435	1.88643	0.00024	This work	0.280759	7e-05	-2.46982	2.49262	3342.56	3521.33	Akia	Metatonalite	65.3259	-52.3047	Gardiner et al., 2019 CMP
307	307 - 31	2983.62	20.3767	I	2.34783	0.280812	8.8e-05	0.001017	0.0355	1.88643	0.00022	This work	0.280754	8.8e-05	-3.79156	3.13323	3349.22	3562.87	Akia	Metatonalite	65.3259	-52.3047	Gardiner et al., 2019 CMP
307	307 - 32	3033.84	22.4664	X	1.19694	0.280813	8.1e-05	0.000832	0.0282	1.88684	0.00023	This work	0.280765	8.2e-05	-2.2217	2.91995	3332.07	3508.83	Akia	Metatonalite	65.3259	-52.3047	Gardiner et al., 2019 CMP
222	222 - 4	3218.55	25.2327	D	-0.00835296	0.280811	8.1e-05	0.00203	0.0726	1.8868	0.00032	Gardiner et al., 2019	0.280685	8.2e-05	-0.669401	2.92123	3439.96	3560.23	Akia	Quartz-albite leucosome	64.9703	-52.2985	Gardiner et al., 2019 CMP
222	222 - 5	3232.09	17.0915	D	3.42315	0.280778	7.1e-05	0.00293	0.1031	1.88662	0.00022	Gardiner et al., 2019	0.280596	7.2e-05	-3.53759	2.56506	3569.61	3739.97	Akia	Quartz-albite leucosome	64.9703	-52.2985	Gardiner et al., 2019 CMP
222	222 - 6	3212.98	21.0238	D	-2.56664	0.280722	8.8e-05	0.00258	0.0867	1.88634	0.00025	Gardiner et al., 2019	0.280562	8.8e-05	-5.17555	3.13493	3613.7	3821.62	Akia	Quartz-albite leucosome	64.9703	-52.2985	Gardiner et al., 2019 CMP
222	222 - 8	3201.76	18.7069	D	3.00526	0.280829	6.3e-05	0.002262	0.0784	1.88649	0.00023	Gardiner et al., 2019	0.28069	6.4e-05	-0.911599	2.27989	3436.37	3561.51	Akia	Quartz-albite leucosome	64.9703	-52.2985	Gardiner et al., 2019 CMP
222	222 - 9	3244.28	16.3406	D	0.543676	0.280897	6.6e-05	0.006409	0.2308	1.88661	0.0002	Gardiner et al., 2019	0.280497	6.6e-05	-6.77338	2.35137	3756.09	3939.65	Akia	Quartz-albite leucosome	64.9703	-52.2985	Gardiner et al., 2019 CMP
222	222 - 10	3204.89	20.5252	D	4.08377	0.280827	6.5e-05	0.001101	0.03178	1.88661	0.00026	Gardiner et al., 2019	0.280759	6.6e-05	1.63655	2.35115	3336.44	3413.11	Akia	Quartz-albite leucosome	64.9703	-52.2985	Gardiner et al., 2019 CMP
222	222 - 11	3240.02	17.6004	I	-1.22054	0.280758	7.3e-05	0.002304	0.0743	1.8866	0.00015	Gardiner et al., 2019	0.280614	7.4e-05	-2.68745	2.63636	3537.83	3696.01	Akia	Quartz-albite leucosome	64.9703	-52.2985	Gardiner et al., 2019 CMP
222	222 - 12	3230.25	18.3322	I	-0.865831	0.280851	6.6e-05	0.003661	0.1291	1.88685	0.00031	Gardiner et al., 2019	0.280623	6.6e-05	-2.59563	2.3513	3537.34	3683.03	Akia	Quartz-albite leucosome	64.9703	-52.2985	Gardiner et al., 2019 CMP
222	222 - 13	3184.77	23.9615	D	2.38766	0.28084	9.3e-05	0.00386	0.132	1.88699	0.00022	Gardiner et al., 2019	0.280604	9.4e-05	-4.38299	3.34845	3572.61	3753.18	Akia	Quartz-albite leucosome	64.9703	-52.2985	Gardiner et al., 2019 CMP
222	222 - 14	3249.13	18.6888	I	-2.54088	0.280781	8.6e-05	0.00288	0.1015	1.88643	0.00024	Gardiner et al., 2019	0.280601	8.6e-05	-2.95014	3.06395	3560.62	3718.55	Akia	Quartz-albite leucosome	64.9703	-52.2985	Gardiner et al., 2019 CMP
222	222 - 15	3240.02	18.2053	D	-6.27575	0.280737	6.3e-05	0.002882	0.1016	1.88662	0.00024	Gardiner et al., 2019	0.280557	6.4e-05	-4.7197	2.2801	3622.17	3815.7	Akia	Quartz-albite leucosome	64.9703	-52.2985	Gardiner et al., 2019 CMP
222	222 - 16	3243.07	19.9761	I	1.7636	0.28084	6.9e-05	0.00235	0.0815	1.88671	0.00026	Gardiner et al., 2019	0.280693	7e-05	0.198876	2.49387	3429.24	3527.94	Akia	Quartz-albite leucosome	64.9703	-52.2985	Gardiner et al., 2019 CMP
222	222 - 17	3024.65	18.3864	D	-5.17434	0.280901	7.6e-05	0.001279	0.0472	1.88675	0.00023	Gardiner et al., 2019	0.280827	7.6e-05	-0.224732	2.70623	3252.46	3383.36	Akia	Quartz-albite leucosome	64.9703	-52.2985	Gardiner et al., 2019 CMP
222	222 - 18	3255.16	19.8051	I	3.48644	0.280788	9.2e-05	0.0041	0.139	1.88705	0.00022	Gardiner et al., 2019	0.280531	9.2e-05	-5.29325	3.27776	3671.51	3861.11	Akia	Quartz-albite leucosome	64.9703	-52.2985	Gardiner et al., 2019 CMP
222	222 - 20	3232.7	17.084	D	3.2572	0.280815	6.9e-05	0.00403	0.1438	1.88688	0.00023	Gardiner et al., 2019	0.280564	7e-05	-4.6442	2.49381	3625.51	3805.6	Akia	Quartz-albite leucosome	64.9703	-52.2985	Gardiner et al., 2019 CMP
222	222 - 21	3265.36	18.4742	I	2.66341	0.280767	6.3e-05	0.00286	0.0973	1.88653	0.00027	Gardiner et al., 2019	0.280587	6.4e-05	-3.05166	2.28023	3578.22	3737.1	Akia	Quartz-albite leucosome	64.9703	-52.2985	Gardiner et al., 2019 CMP
222	222 - 22	3206.13	17.4095	D	-2.24215	0.280783	7.6e-05	0.002874	0.0988	1.88674	0.00022	Gardiner et al., 2019	0.280606	7.6e-05	-3.79841	2.7074	3557.25	3735.26	Akia	Quartz-albite leucosome	64.9703	-52.2985	Gardiner et al., 2019 CMP
222	222 - 23	3210.49	17.3557	D	-0.940711	0.280844	6.8e-05	0.00394	0.1343	1.88675	0.00018	Gardiner et al., 2019	0.280601	6.8e-05	-3.87663	2.42243	3574.79	3743.24	Akia	Quartz-albite leucosome	64.9703	-52.2985	Gardiner et al., 2019 CMP
222	222 - 24	3240.63	20.6149	D	-3.90997	0.280767	6.6e-05	0.001512	0.0519	1.88666	0.00027	Gardiner et al., 2019	0.280673	6.6e-05	-0.5935	2.35135	3452.94	3572.89	Akia	Quartz-albite leucosome	64.9703	-52.2985	Gardiner et al., 2019 CMP
222	222 - 26	3251.54	18.6567	D	3.45213	0.280717	6.7e-05	0.003328	0.1164	1.88665	0.00019	Gardiner et al., 2019	0.280509	6.8e-05	-6.17679	2.42267	3694.38	3910.22	Akia	Quartz-albite leucosome	64.9703	-52.2985	Gardiner et al., 2019 CMP
222	222 - 30	3250.34	18.6727	D	-1.73239	0.280764	6.6e-05	0.00305	0.1067	1.88702	0.00021	Gardiner et al., 2019	0.280573	6.6e-05	-3.90848	2.35141	3600.81	3775.93	Akia	Quartz-albite leucosome	64.9703	-52.2985	Gardiner et al., 2019 CMP
222	222 - 31	3212.98	19.7914	D	5.57466	0.28079	6.7e-05	0.00279	0.0952	1.8867	0.00019	Gardiner et al., 2019	0.280618	6.8e-05	-3.2156	2.42245	3539.48	3706.21	Akia	Quartz-albite leucosome	64.9703	-52.2985	Gardiner et al., 2019 CMP
729	729 - 1	3031.02	21.8961	D	-4.02939	0.280775	8.1e-05	0.000685	0.0225	1.88652	0.00034	This work	0.280735	8.2e-05	-3.33513	2.91993	3369.78	3572.51	Alanngua	Psammite	64.9542	-52.4075	Kirkland et al., 2018 PR
729	729 - 3	2967.46	22.1639	S	3.02209	0.280852	8.5e-05	0.000785	0.02466	1.88682	0.00033	This work	0.280807	8.6e-05	-2.26672	3.0619	3276.42	3460.1	Alanngua	Psammite	64.9542	-52.4075	Kirkland et al., 2018 PR
729	729 - 4	3058.99	20.7741	D	-0.752383	0.280866	8.2e-05	0.000579	0.01913	1.8867	0.00028	This work	0.280832	8.2e-05	0.775088	2.92012	3240.82	3350.7	Alanngua	Psammite	64.9542	-52.4075	Kirkland et al., 2018 PR
729	729 - 5	2968.19	24.3676	D	-6.77648	0.280852	7.3e-05	0.000691	0.0228	1.88663	0.00026	This work	0.280813	7.4e-05	-2.059	2.63467	3268.58	3448.36	Alanngua	Psammite	64.9542	-52.4075	Kirkland et al., 2018 PR
729	729 - 6	3027.48	19.1186	D	3.2754	0.280808	7e-05	0.000878	0.0292	1.88675	0.0003	This work	0.280757	7e-05	-2.64153	2.4926	3342.63	3528.75	Alanngua	Psammite	64.9542	-52.4075	Kirkland et al., 2018 PR
729	729 - 7	3042.97	18.2097	D	0.12731	0.280828	7.4e-05	0.00074	0.02466	1.88669	0.00023	This work	0.280785	7.4e-05	-1.28549	2.63513	3304.42	3460.46	Alanngua	Psammite	64.9542	-52.4075	Kirkland et al., 2018 PR
729	729 - 8	3018.25	19.9567	D	5.00963	0.280875	9.2e-05	0.001039	0.03496	1.88664	0.0003	This work	0.280815	9.2e-05	-0.800631	3.27592	3267.11	3412.55	Alanngua	Psammite	64.9542	-52.4075	Kirkland et al., 2018 PR
729	729 - 9	3012.53	20.0376	S	-0.895169	0.280762	8.2e-05	0.000862	0.0278	1.88683	0.00025	This work	0.280712	8.2e-05	-4.59044	2.9198	3402.24	3632.41	Alanngua	Psammite	64.9542	-52.4075	Kirkland et al., 2018 PR
729	729 - 10	3040.17	17.5441	S	1.34941	0.280764	7.4e-05	0.000812	0.02669	1.88705	0.00026	This work	0.280717	7.4e-05	-3.77907	2.63511	3395.26	3605.83	Alanngua	Psammite	64.9542	-52.4075	Kirkland et al., 2018 PR
729	729 - 11	2963.76	18.5182	D	6.29574	0.280871	7e-05	0.000821	0.02852	1.88686	0.00028	This work	0.280824	7e-05	-1.74843	2.49223	3254.22	3426.52	Alanngua	Psammite	64.9542	-52.4075	Kirkland et al., 2018 PR
729	729 - 12	3018.96	19.2343	D	-1.33239	0.28079	8.3e-05	0.000734	0.02424	1.88672	0.00027	This work	0.280747	8.4e-05	-3.18127	2.99106	3354.16	3554.09	Alanngua	Psammite	64.9542	-52.4075	Kirkland et al., 2018 PR
729	729 - 13	2990.9	22.5264	S	0.483656	0.280795	8.5e-05	0.000758	0.02456	1.88658	0.00025	This work	0.280751	8.6e-05	-3.70048	3.06207	3349.6	3563.11	Alanngua	Psammite	64.9542	-52.4075	Kirkland et al., 2018 PR
729	729 - 14	2987.99	22.5728	S	0.169327	0.280835	7.2e-05	0.001017	0.03427	1.88659	0.00025	This work	0.280777	7.2e-05	-2.87247	2.56358	3318.58	3511.87	Alanngua	Psammite	64.9542	-52.4075	Kirkland et al., 2018 PR
729	729 - 15	3005.36	23.0166	S	-1.08246	0.280785	8.7e-05	0.000438	0.01465	1.88674	0.00024	This work	0.28076	8.8e-05	-3.06524	3.13339	3335.63	3536.71	Alanngua	Psammite	64.9542	-52.4075	Kirkland et al., 2018 PR
729	729 - 16	3002.48	19.4598	S	1.73514	0.280785	8e-05	0.000874	0.02911	1.88685	0.00026	This work	0.280735	8e-05	-4.02746	2.84852	3372.8	3591.38	Alanngua	Psammite	64.9542	-52.4075	Kirkland et al., 2018 PR
729	729 - 17	3021.09	20.6278	S	-2.47866	0.280701	8.6e-05	0.000698	0.023	1.88724	0.00028	This work	0.28066	8.6e-05	-6.22666	3.06229	3468.49	3735.55	Alanngua	Psammite	64.9542	-52.4075	Kirkland et al., 2018 PR
729	729 - 18	3057.6	18.0219	S	0.908086	0.2808	7.3e-05	0.000796	0.0293	1.88685	0.00029	This work	0.280753	7.4e-05	-2.06142	2.63522	3346.23	3517.75	Alanngua	Psammite	64.9542	-52.4075	Kirkland et al., 2018 PR
729	729 - 19	3054.83	20.1409	D	-1.92062	0.280799	9e-05	0.000568	0.01937	1.8867	0.00026	This work	0.280766	9e-05	-1.68457	3.20498	3328.2	3493.29	Alanngua	Psammite	64.9542	-52.4075	Kirkland et al., 2018 PR
729	729 - 20	3038.76	20.3714	S	-0.988466	0.280721	7.8e-05	0.000781	0.02567	1.88656	0.00033	This work	0.280675	7.8e-05	-5.27823	2.77754	3449.41	3693.25	Alanngua	Psammite	64.9542	-52.4075	Kirkland et al., 2018 PR
729	729 - 21	3011.1	19.3415	D	-5.38588	0.28078	7e-05	0.000539	0.0181	1.88654	0.00021	This work	0.280749	7e-05	-3.31738	2.4925	3350.74	3556.06	Alanngua	Psammite	64.9542	-52.4075	Kirkland et al., 2018 PR
729	729 - 22	3023.23	19.1763	S	2.40949	0.280821	6.9e-05	0.000899	0.03179	1.88668	0.00025	This work	0.280769	7e-05	-2.31995	2.49258	3327.16	3506.43	Alanngua	Psammite	64.9542	-52.4075	Kirkland et al., 2018 PR
729	729 - 23	3028.9	18.3921	S	-3.09501	0.280808	8.9e-05	0.000886	0.0296	1.88691	0.00026	This work	0.280756	9e-05	-2.62553	3.20478	3343.31	3528.9	Alanngua	Psammite	64.9542	-52.4075	Kirkland et al., 2018 PR
729	729 - 24	2890.81	26.5144	Y	1.12243	0.280806	9.4e-05	0.000449	0.01445	1.8867	0.00029	This work	0.280781	9.4e-05	-5.00611	3.34613	3308.99	3563.07	Alanngua	Psammite	64.9542	-52.4075	Kirkland et al., 2018 PR
729	729 - 25	3018.25	21.3822	S	4.53102	0.280796	8.5e-05	0.000671	0.02336	1.88674	0.00025	This work	0.280757	8.6e-05	-2.85405	3.06227	3340.87	3534.18	Alanngua	Psammite	64.9542	-52.4075	Kirkland et al., 2018 PR
729	729 - 26	3045.07	20.2806	S	-0.0283204	0.280729	8.7e-05	0.000449	0.01484	1.88665	0.00028	This work	0.280703	8.8e-05	-4.15615	3.13369	3410	3631.89	Alanngua	Psammite	64.9542	-52.4075	Kirkland et al., 2018 PR
729	729 - 27	3021.09	22.0505	S	-0.702463	0.28083	8.9e-05	0.00076	0.02491	1.88685	0.00025	This work	0.280786	9e-05	-1.76132	3.20472	3303.46	3471.7	Alanngua	Psammite	64.9542	-52.4075	Kirkland et al., 2018 PR
729	729 - 28	3008.23	19.3808	S	-0.932402	0.280782	9.8e-05	0.00096	0.03144	1.88713	0.00034	This work	0.280727	9.8e-05	-4.17884	3.48948	3384.21	3604.78	Alanngua	Psammite	64.9542	-52.4075	Kirkland et al., 2018 PR
729	729 - 29	3017.53	17.8275	S	4.12627	0.280795	8.6e-05	0.00067	0.02456	1.8866	0.00026	This work	0.280756	8.6e-05	-2.9041	3.06227	3342.11	3536.59	Alanngua	Psammite	64.9542	-52.4075	Kirkland et al., 2018 PR
729	729 - 30	3016.82	19.2634	S	1.87797	0.280803	8.3e-05	0.00088	0.0296	1.88657	0.00021	This work	0.280752	8.4e-05	-3.069	2.99105	3349.43	3545.8	Alanngua	Psammite	64.9542	-52.4075	Kirkland et al., 2018 PR
729	729 - 31	3049.26	20.2205	S	1.81622	0.280811	7.6e-05	0.001009	0.03459	1.88667	0.00029	This work	0.280752	7.6e-05	-2.30662	2.70639	3349.87	3525.8	Alanngua	Psammite	64.9542	-52.4075	Kirkland et al., 2018 PR
729	729 - 32	2993.08	19.5896	S	0.230597	0.280864	7e-05	0.000674	0.02241	1.8866	0.00026	This work	0.280825	7e-05	-1.02153	2.4924	3251.3	3406.13	Alanngua	Psammite	64.9542	-52.4075	Kirkland et al., 2018 PR
729	729 - 33	3036.66	19.6984	S	-0.490785	0.280859	9e-05	0.00082	0.02703	1.88669	0.00033	This work	0.280811	9e-05	-0.493818	3.20484	3270.06	3408.64	Alanngua	Psammite	64.9542	-52.4075	Kirkland et al., 2018 PR
729	729 - 34	3050.66	18.8074	S	-2.07305	0.280759	8.2e-05	0.000827	0.0281	1.88677	0.00028	This work	0.280711	8.2e-05	-3.74655	2.92006	3403.18	3612.01	Alanngua	Psammite	64.9542	-52.4075	Kirkland et al., 2018 PR
729	729 - 35	2966.72	23.6538	S	3.37367	0.280858	8.6e-05	0.000607	0.0193	1.88651	0.00027	This work	0.280823	8.6e-05	-1.70921	3.0619	3253.68	3426.48	Alanngua	Psammite	64.9542	-52.4075	Kirkland et al., 2018 PR
729	729 - 36	3058.3	23.5556	S	1.20734	0.280814	8.7e-05	0.000481	0.0162	1.88693	0.00022	This work	0.280786	8.8e-05	-0.887728	3.13378	3301.16	3448.78	Alanngua	Psammite	64.9542	-52.4075	Kirkland et al., 2018 PR
729	729 - 37	3181.6	22.2155	S	0.472205	0.280734	9.1e-05	0.00171	0.0719	1.8868	0.0002	This work	0.280629	9.2e-05	-3.53829	3.27719	3515.44	3700.96	Alanngua	Psammite	64.9542	-52.4075	Kirkland et al., 2018 PR
729	729 - 38	3022.52	17.7647	S	1.17542	0.280735	8e-05	0.000925	0.0333	1.88668	0.00032	This work	0.280681	8e-05	-5.45234	2.84865	3443.54	3690.99	Alanngua	Psammite	64.9542	-52.4075	Kirkland et al., 2018 PR
729	729 - 39	2983.62	21.1819	S	1.31904	0.280774	7.8e-05	0.000794	0.0267	1.88673	0.00031	This work	0.280729	7.8e-05	-4.68971	2.77718	3380.47	3615.96	Alanngua	Psammite	64.9542	-52.4075	Kirkland et al., 2018 PR
729	729 - 40	3035.95	20.412	S	2.26841	0.280831	8.4e-05	0.00066	0.0223	1.88665	0.00026	This work	0.280793	8.4e-05	-1.17484	2.99118	3293.74	3448.46	Alanngua	Psammite	64.9542	-52.4075	Kirkland et al., 2018 PR
729	729 - 41	3044.37	20.2907	S	-2.29675	0.280823	9.3e-05	0.000905	0.03244	1.88682	0.00029	This work	0.28077	9.4e-05	-1.77481	3.34734	3325.02	3490.53	Alanngua	Psammite	64.9542	-52.4075	Kirkland et al., 2018 PR
729	729 - 42	3040.17	18.2459	S	0.20733	0.280827	7.1e-05	0.000747	0.0268	1.88705	0.00031	This work	0.280783	7.2e-05	-1.40049	2.5639	3306.34	3465.1	Alanngua	Psammite	64.9542	-52.4075	Kirkland et al., 2018 PR
729	729 - 43	3006.08	23.0049	S	-3.32195	0.280806	8.6e-05	0.000749	0.0259	1.88648	0.00027	This work	0.280763	8.6e-05	-2.94	3.06218	3334.29	3529.85	Alanngua	Psammite	64.9542	-52.4075	Kirkland et al., 2018 PR
729	729 - 44	3029.6	21.211	S	-1.2013	0.280893	8.9e-05	0.000765	0.025	1.88653	0.00039	This work	0.280848	9e-05	0.668216	3.20479	3220.4	3334.2	Alanngua	Psammite	64.9542	-52.4075	Kirkland et al., 2018 PR
729	729 - 45	3033.13	19.7475	S	5.0812	0.280758	8.8e-05	0.00093	0.0327	1.88655	0.00022	This work	0.280704	8.8e-05	-4.39977	3.1336	3413.47	3637.05	Alanngua	Psammite	64.9542	-52.4075	Kirkland et al., 2018 PR
729	729 - 46	3054.83	18.7519	S	-0.483639	0.280768	7.8e-05	0.000657	0.0221	1.88696	0.0003	This work	0.280729	7.8e-05	-2.97452	2.77765	3376.61	3569.61	Alanngua	Psammite	64.9542	-52.4075	Kirkland et al., 2018 PR
729	729 - 47	3008.23	22.9698	S	2.04517	0.280867	8.4e-05	0.0004404	0.01497	1.88666	0.00026	This work	0.280842	8.4e-05	-0.083408	2.99099	3228.14	3362.23	Alanngua	Psammite	64.9542	-52.4075	Kirkland et al., 2018 PR
729	729 - 48	3025.35	19.8566	D	0.438575	0.280908	7.9e-05	0.000956	0.03231	1.88662	0.00025	This work	0.280852	8e-05	0.708994	2.84867	3216.19	3328.48	Alanngua	Psammite	64.9542	-52.4075	Kirkland et al., 2018 PR
729	729 - 49	3003.92	23.04	S	3.19913	0.280828	7.1e-05	0.000727	0.0231	1.88654	0.00029	This work	0.280786	7.2e-05	-2.1613	2.56368	3303.33	3482.09	Alanngua	Psammite	64.9542	-52.4075	Kirkland et al., 2018 PR
729	729 - 51	3033.84	20.4426	S	0.583876	0.280876	8.3e-05	0.000717	0.02285	1.88656	0.00027	This work	0.280834	8.4e-05	0.260321	2.99117	3238.98	3361.71	Alanngua	Psammite	64.9542	-52.4075	Kirkland et al., 2018 PR
729	729 - 52	3030.31	19.0804	S	1.49653	0.280772	7e-05	0.000809	0.02661	1.88706	0.00032	This work	0.280725	7e-05	-3.71532	2.49262	3384.41	3594.44	Alanngua	Psammite	64.9542	-52.4075	Kirkland et al., 2018 PR
729	729 - 53	3008.23	20.0986	D	-7.18244	0.280868	9.9e-05	0.000812	0.02727	1.88673	0.00021	This work	0.280821	0.0001	-0.812199	3.5607	3257.45	3405.47	Alanngua	Psammite	64.9542	-52.4075	Kirkland et al., 2018 PR
729	729 - 54	2982.15	33.6336	S	-1.49086	0.280917	9.5e-05	0.000871	0.0302	1.88667	0.00038	This work	0.280867	9.6e-05	0.211125	3.41806	3197.22	3324.49	Alanngua	Psammite	64.9542	-52.4075	Kirkland et al., 2018 PR
729	729 - 55	3015.39	22.1396	D	-0.198326	0.280808	0.0001	0.000658	0.02283	1.8866	0.00032	This work	0.28077	0.0001	-2.46602	3.56076	3323.93	3509.01	Alanngua	Psammite	64.9542	-52.4075	Kirkland et al., 2018 PR
729	729 - 56	3046.47	20.2606	S	-2.85198	0.280875	7.8e-05	0.000822	0.0272	1.88655	0.00032	This work	0.280827	7.8e-05	0.298153	2.77759	3248.99	3369.28	Alanngua	Psammite	64.9542	-52.4075	Kirkland et al., 2018 PR
729	729 - 57	3041.57	20.331	S	3.76388	0.280828	7.9e-05	0.000695	0.0232	1.88687	0.00027	This work	0.280787	8e-05	-1.22426	2.84878	3300.64	3455.75	Alanngua	Psammite	64.9542	-52.4075	Kirkland et al., 2018 PR
729	729 - 58	2993.8	21.0299	S	-0.0837009	0.280742	7.7e-05	0.000527	0.01696	1.88663	0.00025	This work	0.280712	7.8e-05	-5.04776	2.77725	3399.66	3644.97	Alanngua	Psammite	64.9542	-52.4075	Kirkland et al., 2018 PR
729	729 - 59	3021.8	22.0394	S	-2.5205	0.280869	6.8e-05	0.000523	0.01821	1.88662	0.00031	This work	0.280839	6.8e-05	0.133617	2.42135	3232.27	3359.88	Alanngua	Psammite	64.9542	-52.4075	Kirkland et al., 2018 PR
729	729 - 60	2990.9	19.6198	S	4.19642	0.280829	9.8e-05	0.000704	0.0233	1.88675	0.00031	This work	0.280789	9.8e-05	-2.37947	3.48934	3300.07	3484.93	Alanngua	Psammite	64.9542	-52.4075	Kirkland et al., 2018 PR
729	729 - 61	3020.38	19.9266	S	2.95328	0.280869	8.7e-05	0.000825	0.02709	1.88639	0.00031	This work	0.280821	8.8e-05	-0.523305	3.1335	3257.21	3397.76	Alanngua	Psammite	64.9542	-52.4075	Kirkland et al., 2018 PR
729	729 - 62	3013.25	21.4579	S	0.333742	0.280787	9e-05	0.000827	0.0285	1.88679	0.00025	This work	0.280739	9e-05	-3.61167	3.20467	3366.1	3575.13	Alanngua	Psammite	64.9542	-52.4075	Kirkland et al., 2018 PR
729	729 - 63	3198.63	26.3373	S	1.34777	0.280776	7.5e-05	0.001377	0.05084	1.8866	0.00024	This work	0.280691	7.6e-05	-0.928847	2.70735	3428.8	3560.1	Alanngua	Psammite	64.9542	-52.4075	Kirkland et al., 2018 PR
729	729 - 64	3049.26	20.2205	S	5.44803	0.280741	0.0001	0.00116	0.0382	1.88671	0.00034	This work	0.280673	0.0001	-5.11435	3.56104	3456.36	3691.68	Alanngua	Psammite	64.9542	-52.4075	Kirkland et al., 2018 PR
729	729 - 65	3052.05	19.4848	S	3.93335	0.280838	7.1e-05	0.000934	0.0316	1.88649	0.00027	This work	0.280783	7.2e-05	-1.12463	2.56397	3307.54	3457.97	Alanngua	Psammite	64.9542	-52.4075	Kirkland et al., 2018 PR
729	729 - 66	3001.76	21.633	S	-1.99322	0.280863	9.4e-05	0.001055	0.0346	1.88701	0.0003	This work	0.280802	9.4e-05	-1.63824	3.347	3284.47	3449.42	Alanngua	Psammite	64.9542	-52.4075	Kirkland et al., 2018 PR
729	729 - 67	2985.08	18.9711	S	-0.308513	0.280881	6.8e-05	0.000902	0.0305	1.88628	0.00026	This work	0.280829	6.8e-05	-1.06671	2.42114	3247.67	3402.61	Alanngua	Psammite	64.9542	-52.4075	Kirkland et al., 2018 PR
729	729 - 68	3033.13	19.7475	S	8.43903	0.280895	9e-05	0.0008556	0.02907	1.88663	0.00028	This work	0.280845	9e-05	0.633031	3.20482	3225.21	3339.03	Alanngua	Psammite	64.9542	-52.4075	Kirkland et al., 2018 PR
729	729 - 69	2981.42	20.4832	S	-2.35243	0.280899	6.5e-05	0.000617	0.02037	1.88696	0.00028	This work	0.280864	6.6e-05	0.0710878	2.34991	3200.36	3332.24	Alanngua	Psammite	64.9542	-52.4075	Kirkland et al., 2018 PR
729	729 - 70	2961.53	28.1919	S	-2.44238	0.280884	7.2e-05	0.000783	0.0273	1.88666	0.00033	This work	0.280839	7.2e-05	-1.25988	2.56342	3233.82	3395.82	Alanngua	Psammite	64.9542	-52.4075	Kirkland et al., 2018 PR
729	729 - 71	3042.27	18.9194	S	0.673745	0.280876	7.3e-05	0.00084	0.02836	1.88622	0.00033	This work	0.280827	7.4e-05	0.19947	2.63513	3249.16	3371.87	Alanngua	Psammite	64.9542	-52.4075	Kirkland et al., 2018 PR
729	729 - 72	3038.06	18.2731	S	1.36094	0.28088	8.9e-05	0.001202	0.0392	1.88664	0.0003	This work	0.28081	9e-05	-0.507448	3.20485	3274.14	3410.54	Alanngua	Psammite	64.9542	-52.4075	Kirkland et al., 2018 PR
729	729 - 73	2982.15	18.2791	S	-1.69355	0.280787	8.7e-05	0.000864	0.0291	1.8867	0.00025	This work	0.280738	8.8e-05	-4.40323	3.13322	3369.28	3597.9	Alanngua	Psammite	64.9542	-52.4075	Kirkland et al., 2018 PR
729	729 - 74	3039.47	19.6592	S	4.06123	0.280873	8.4e-05	0.000895	0.0302	1.88657	0.00028	This work	0.280821	8.4e-05	-0.086387	2.99121	3257.72	3386.65	Alanngua	Psammite	64.9542	-52.4075	Kirkland et al., 2018 PR
729	729 - 75	3038.06	21.0844	S	-2.11623	0.280836	8.3e-05	0.000994	0.0351	1.88681	0.00031	This work	0.280778	8.4e-05	-1.64201	2.9912	3315.3	3477.78	Alanngua	Psammite	64.9542	-52.4075	Kirkland et al., 2018 PR
315	315 - 2	2989.45	21.8222	S	1.68914	0.280785	5.9e-05	0.000703	0.0259	1.88652	0.00022	This work	0.280745	6e-05	-3.97768	2.13632	3358.12	3578.38	Alanngua	Psammite	64.9741	-52.4151	Kirkland et al., 2018 PR
315	315 - 3	2994.53	29.7167	S	0.984453	0.280882	9.2e-05	0.000681	0.02393	1.88668	0.00027	This work	0.280843	9.2e-05	-0.361392	3.27574	3228.07	3368.09	Alanngua	Psammite	64.9741	-52.4151	Kirkland et al., 2018 PR
315	315 - 4	2983.62	18.9906	D	-5.48327	0.28084	9.6e-05	0.000877	0.0311	1.8866	0.00029	This work	0.28079	9.6e-05	-2.50907	3.41807	3300.06	3486.97	Alanngua	Psammite	64.9741	-52.4151	Kirkland et al., 2018 PR
315	315 - 6	2877.49	22.8283	D	2.90471	0.28085	9.2e-05	0.001099	0.0411	1.88676	0.00032	This work	0.280789	9.2e-05	-5.02639	3.27483	3305.55	3554	Alanngua	Psammite	64.9741	-52.4151	Kirkland et al., 2018 PR
315	315 - 7	2922.42	21.3543	D	5.88992	0.280963	8.9e-05	0.00084	0.0334	1.88662	0.00024	This work	0.280916	9e-05	0.537582	3.20398	3133.5	3258.69	Alanngua	Psammite	64.9741	-52.4151	Kirkland et al., 2018 PR
315	315 - 8	2958.56	28.9946	D	-1.31695	0.280874	7e-05	0.00283	0.0879	1.88652	0.00024	This work	0.280713	7e-05	-5.8232	2.4922	3426.08	3663.58	Alanngua	Psammite	64.9741	-52.4151	Kirkland et al., 2018 PR
315	315 - 9	2755.09	42.8926	D	-4.63282	0.280994	7.9e-05	0.00243	0.0755	1.88659	0.00024	This work	0.280866	8e-05	-5.18636	2.84686	3223.43	3469.14	Alanngua	Psammite	64.9741	-52.4151	Kirkland et al., 2018 PR
315	315 - 10	2960.79	37.1141	S	4.15947	0.280883	7.3e-05	0.000773	0.0274	1.88671	0.0003	This work	0.280839	7.4e-05	-1.29235	2.63462	3234.32	3397.17	Alanngua	Psammite	64.9741	-52.4151	Kirkland et al., 2018 PR
315	315 - 11	3023.23	22.7274	D	0.114706	0.280905	0.0001	0.00127	0.0458	1.88695	0.00026	This work	0.280831	0.0001	-0.0959661	3.56082	3246.33	3374.61	Alanngua	Psammite	64.9741	-52.4151	Kirkland et al., 2018 PR
315	315 - 14	2906.01	16.9736	D	0.44689	0.280856	7.1e-05	0.001101	0.03792	1.88645	0.00026	This work	0.280795	7.2e-05	-4.16686	2.56308	3297.71	3525.14	Alanngua	Psammite	64.9741	-52.4151	Kirkland et al., 2018 PR
315	315 - 16	2979.23	17.5843	S	-1.56354	0.280818	8e-05	0.00219	0.0753	1.88625	0.00029	This work	0.280693	8e-05	-6.06722	2.84836	3444.91	3693.9	Alanngua	Psammite	64.9741	-52.4151	Kirkland et al., 2018 PR
315	315 - 18	2890.81	23.3951	D	-0.730582	0.28096	0.0001	0.001196	0.0425	1.88671	0.00039	This work	0.280894	0.0001	-0.998746	3.55971	3166.34	3325.5	Alanngua	Psammite	64.9741	-52.4151	Kirkland et al., 2018 PR
315	315 - 19	2871.97	18.1757	D	6.16402	0.280916	5.9e-05	0.001472	0.04786	1.88658	0.00017	This work	0.280835	6e-05	-3.53418	2.13573	3248.52	3461.38	Alanngua	Psammite	64.9741	-52.4151	Kirkland et al., 2018 PR
315	315 - 20	2900.13	22.4672	D	5.90776	0.280811	9.1e-05	0.0017	0.063	1.88666	0.00031	This work	0.280716	9.2e-05	-7.08906	3.27501	3410.31	3693.31	Alanngua	Psammite	64.9741	-52.4151	Kirkland et al., 2018 PR
315	315 - 21	2841.62	22.6044	D	-2.63301	0.280896	8.3e-05	0.001509	0.0528	1.88678	0.00024	This work	0.280814	8.4e-05	-5.00099	2.98981	3278.67	3524.84	Alanngua	Psammite	64.9741	-52.4151	Kirkland et al., 2018 PR
315	315 - 22	2871.49	17.3913	D	-2.81833	0.280908	5.9e-05	0.001609	0.04988	1.88683	0.00019	This work	0.280819	6e-05	-4.0982	2.13573	3270.97	3494.43	Alanngua	Psammite	64.9741	-52.4151	Kirkland et al., 2018 PR
315	315 - 23	2834.33	20.2861	D	-1.0811	0.280959	7e-05	0.001996	0.0624	1.88682	0.00018	This work	0.280851	7e-05	-3.8643	2.49147	3234.5	3451.88	Alanngua	Psammite	64.9741	-52.4151	Kirkland et al., 2018 PR
315	315 - 24	3002.48	19.4598	D	2.49728	0.280887	7.9e-05	0.001425	0.05191	1.88663	0.00037	This work	0.280805	8e-05	-1.52679	2.84852	3283.66	3443.38	Alanngua	Psammite	64.9741	-52.4151	Kirkland et al., 2018 PR
315	315 - 25	2907.09	18.5026	D	3.79275	0.280891	8.7e-05	0.001238	0.0446	1.88669	0.00026	This work	0.280822	8.8e-05	-3.16832	3.13267	3262.43	3466.83	Alanngua	Psammite	64.9741	-52.4151	Kirkland et al., 2018 PR
315	315 - 26	2991.63	22.5148	D	7.09869	0.280998	8.4e-05	0.000647	0.0222	1.88672	0.00033	This work	0.280961	8.4e-05	3.77124	2.99087	3071.73	3119.98	Alanngua	Psammite	64.9741	-52.4151	Kirkland et al., 2018 PR
315	315 - 27	2584.66	17.3932	D	-8.11184	0.280976	8.1e-05	0.00371	0.1252	1.88661	0.00029	This work	0.280793	8.2e-05	-11.7839	2.91686	3363.23	3728.64	Alanngua	Psammite	64.9741	-52.4151	Kirkland et al., 2018 PR
315	315 - 28	3003.2	31.6961	D	7.49851	0.280901	6.2e-05	0.002275	0.0711	1.8866	0.00023	This work	0.28077	6.2e-05	-2.75746	2.20761	3338.44	3516.83	Alanngua	Psammite	64.9741	-52.4151	Kirkland et al., 2018 PR
315	315 - 29	3038.06	28.8153	P	-3.41048	0.280923	6.9e-05	0.003721	0.1135	1.88665	0.00016	This work	0.280706	7e-05	-4.21116	2.49266	3440.2	3629.72	Alanngua	Psammite	64.9741	-52.4151	Kirkland et al., 2018 PR
315	315 - 30	3002.69	16.5743	S	-1.97472	0.280935	8.1e-05	0.0012	0.04275	1.88654	0.00025	This work	0.280866	8.2e-05	0.649169	2.91973	3200.22	3314.42	Alanngua	Psammite	64.9741	-52.4151	Kirkland et al., 2018 PR
315	315 - 31	2579.92	17.4507	D	-3.08924	0.280954	6.6e-05	0.00375	0.1263	1.88657	0.00022	This work	0.280769	6.6e-05	-12.7353	2.34769	3398.51	3781.14	Alanngua	Psammite	64.9741	-52.4151	Kirkland et al., 2018 PR
315	315 - 32	2991.41	16.7071	S	-1.83616	0.280849	7.1e-05	0.001129	0.0424	1.88669	0.00013	This work	0.280784	7.2e-05	-2.52479	2.5636	3309.44	3493.93	Alanngua	Psammite	64.9741	-52.4151	Kirkland et al., 2018 PR
315	315 - 33	2986.53	21.8671	D	-1.17999	0.280882	9.2e-05	0.000742	0.02686	1.88691	0.0003	This work	0.280839	9.2e-05	-0.670923	3.27567	3233.09	3380.26	Alanngua	Psammite	64.9741	-52.4151	Kirkland et al., 2018 PR
315	315 - 34	3009.67	20.7953	D	-1.01796	0.28093	7.1e-05	0.000643	0.0227	1.8868	0.00028	This work	0.280893	7.2e-05	1.77633	2.56371	3161.47	3252.84	Alanngua	Psammite	64.9741	-52.4151	Kirkland et al., 2018 PR
315	315 - 35	2987.26	21.8559	D	-0.614457	0.28094	8.8e-05	0.001289	0.045	1.88646	0.00026	This work	0.280866	8.8e-05	0.293923	3.13326	3200.87	3323.54	Alanngua	Psammite	64.9741	-52.4151	Kirkland et al., 2018 PR
315	315 - 36	2996.7	26.7763	D	4.42329	0.280933	9.2e-05	0.000791	0.0273	1.88663	0.0003	This work	0.280887	9.2e-05	1.27941	3.27575	3169.44	3272.3	Alanngua	Psammite	64.9741	-52.4151	Kirkland et al., 2018 PR
315	315 - 37	2970.41	30.2276	S	2.24529	0.280879	8.5e-05	0.000755	0.025	1.88662	0.00032	This work	0.280836	8.6e-05	-1.17647	3.06193	3238.14	3397.75	Alanngua	Psammite	64.9741	-52.4151	Kirkland et al., 2018 PR
315	315 - 38	2555.67	23.6634	D	-0.942341	0.280861	7.8e-05	0.0001968	0.00755	1.88695	0.00027	This work	0.280851	7.8e-05	-10.3702	2.77439	3216.21	3622.98	Alanngua	Psammite	64.9741	-52.4151	Kirkland et al., 2018 PR
315	315 - 39	2999.59	25.2772	D	1.98082	0.280895	7.2e-05	0.000819	0.02829	1.88687	0.00031	This work	0.280848	7.2e-05	-0.064343	2.56365	3222.19	3354.39	Alanngua	Psammite	64.9741	-52.4151	Kirkland et al., 2018 PR
315	315 - 40	3000.31	28.1517	D	0.511764	0.280878	7.9e-05	0.00065	0.0218	1.88646	0.00027	This work	0.280841	8e-05	-0.306318	2.8485	3230.81	3369.31	Alanngua	Psammite	64.9741	-52.4151	Kirkland et al., 2018 PR
315	315 - 41	2971.14	18.4218	D	0.671349	0.280933	8.2e-05	0.000761	0.02708	1.88636	0.00022	This work	0.28089	8.2e-05	0.750961	2.91952	3167.01	3283.86	Alanngua	Psammite	64.9741	-52.4151	Kirkland et al., 2018 PR
315	315 - 42	2987.26	19.6703	D	1.54891	0.280872	6.7e-05	0.001142	0.04349	1.88681	0.00027	This work	0.280806	6.8e-05	-1.82703	2.42115	3279.79	3449.38	Alanngua	Psammite	64.9741	-52.4151	Kirkland et al., 2018 PR
315	315 - 43	2935.33	24.9395	D	6.0315	0.280874	0.0001	0.001164	0.041	1.88656	0.00041	This work	0.280808	0.0001	-2.98385	3.56008	3278.97	3477.74	Alanngua	Psammite	64.9741	-52.4151	Kirkland et al., 2018 PR
315	315 - 44	2893.14	20.2424	P	-3.32782	0.280959	5.8e-05	0.002238	0.0668	1.8868	0.00015	This work	0.280835	5.8e-05	-3.03986	2.06464	3255.27	3448.44	Alanngua	Psammite	64.9741	-52.4151	Kirkland et al., 2018 PR
315	315 - 45	3018.96	37.0438	S	-0.893554	0.280894	7.8e-05	0.000633	0.0222	1.88656	0.00028	This work	0.280857	7.8e-05	0.730479	2.77741	3208.27	3322.23	Alanngua	Psammite	64.9741	-52.4151	Kirkland et al., 2018 PR
315	315 - 46	2994.53	18.1199	D	2.00613	0.280905	7.1e-05	0.001915	0.0713	1.88673	0.0002	This work	0.280795	7.2e-05	-2.06888	2.56362	3301.38	3469.34	Alanngua	Psammite	64.9741	-52.4151	Kirkland et al., 2018 PR
315	315 - 47	2991.63	24.6937	S	0.670832	0.280921	9.7e-05	0.00101	0.0352	1.88672	0.00026	This work	0.280863	9.8e-05	0.287174	3.48935	3203.3	3327.33	Alanngua	Psammite	64.9741	-52.4151	Kirkland et al., 2018 PR
315	315 - 48	3000.31	23.8206	D	2.48152	0.280867	8.7e-05	0.000753	0.0261	1.88651	0.00035	This work	0.280824	8.8e-05	-0.909285	3.13335	3253.87	3405.09	Alanngua	Psammite	64.9741	-52.4151	Kirkland et al., 2018 PR
315	315 - 49	2985.08	24.8083	D	-9.57977	0.280822	7.1e-05	0.000614	0.02078	1.88646	0.0003	This work	0.280787	7.2e-05	-2.5797	2.56356	3301.76	3492.28	Alanngua	Psammite	64.9741	-52.4151	Kirkland et al., 2018 PR
315	315 - 50	2999.59	32.4993	D	0.474307	0.280797	9.7e-05	0.000592	0.01975	1.88654	0.00032	This work	0.280763	9.8e-05	-3.08819	3.48941	3332.86	3533.61	Alanngua	Psammite	64.9741	-52.4151	Kirkland et al., 2018 PR
315	315 - 51	2546.77	19.8419	M	-0.989554	0.280984	6.9e-05	0.0004137	0.01506	1.88652	0.00029	This work	0.280964	7e-05	-6.5778	2.48978	3072.03	3391.42	Alanngua	Psammite	64.9741	-52.4151	Kirkland et al., 2018 PR
315	315 - 52	2973.35	27.2218	S	0.758867	0.280848	9.6e-05	0.000733	0.02686	1.88703	0.00029	This work	0.280806	9.6e-05	-2.16751	3.41799	3277.37	3458.79	Alanngua	Psammite	64.9741	-52.4151	Kirkland et al., 2018 PR
315	315 - 53	2785.64	24.3505	D	-0.506717	0.280902	8.1e-05	0.002721	0.0892	1.88682	0.00025	This work	0.280757	8.2e-05	-8.3474	2.91824	3377.04	3679.63	Alanngua	Psammite	64.9741	-52.4151	Kirkland et al., 2018 PR
315	315 - 55	2940.61	23.3409	D	5.15946	0.280805	0.00011	0.001309	0.04329	1.88665	0.00035	This work	0.280731	0.00011	-5.61145	3.91614	3383.89	3637.24	Alanngua	Psammite	64.9741	-52.4151	Kirkland et al., 2018 PR
315	315 - 56	2985.8	18.9613	S	-3.38243	0.280841	7.5e-05	0.000594	0.0202	1.88676	0.00028	This work	0.280807	7.6e-05	-1.84547	2.70599	3275.03	3449.35	Alanngua	Psammite	64.9741	-52.4151	Kirkland et al., 2018 PR
315	315 - 57	2929.27	22.0104	D	2.42076	0.280895	8.2e-05	0.001601	0.05634	1.88652	0.00028	This work	0.280805	8.2e-05	-3.24868	2.91923	3287.89	3488.74	Alanngua	Psammite	64.9741	-52.4151	Kirkland et al., 2018 PR
315	315 - 58	2909.4	19.2422	D	-0.00218454	0.280898	7.7e-05	0.000782	0.0286	1.88671	0.00029	This work	0.280854	7.8e-05	-1.96053	2.7767	3215.17	3397.01	Alanngua	Psammite	64.9741	-52.4151	Kirkland et al., 2018 PR
315	315 - 59	3009.67	32.9856	D	-4.38609	0.280848	8.3e-05	0.000655	0.02213	1.88687	0.0003	This work	0.28081	8.4e-05	-1.16815	2.991	3270.87	3427.69	Alanngua	Psammite	64.9741	-52.4151	Kirkland et al., 2018 PR
315	315 - 60	3003.92	26.64	S	-0.527263	0.280888	9.2e-05	0.000751	0.0267	1.88648	0.00028	This work	0.280845	9.2e-05	-0.0742042	3.27581	3225.88	3358.33	Alanngua	Psammite	64.9741	-52.4151	Kirkland et al., 2018 PR
315	315 - 61	3002.48	28.1086	S	2.87935	0.280904	9.5e-05	0.000968	0.0343	1.88679	0.00033	This work	0.280848	9.6e-05	0.0167313	3.41822	3222.51	3351.81	Alanngua	Psammite	64.9741	-52.4151	Kirkland et al., 2018 PR
315	315 - 62	3189.19	47.9793	D	4.87042	0.280883	0.0001	0.000449	0.0159	1.88696	0.00031	This work	0.280855	0.0001	4.69617	3.56222	3207.8	3219.18	Alanngua	Psammite	64.9741	-52.4151	Kirkland et al., 2018 PR
315	315 - 63	2886.12	48.5097	P	3.99294	0.280918	7e-05	0.002296	0.0658	1.88667	0.00022	This work	0.280791	7e-05	-4.76809	2.49177	3316.86	3545.37	Alanngua	Psammite	64.9741	-52.4151	Kirkland et al., 2018 PR
315	315 - 64	2982.15	27.0531	D	-9.42664	0.280877	8.4e-05	0.000752	0.0275	1.88662	0.00037	This work	0.280834	8.4e-05	-0.970474	2.9908	3240.54	3394.63	Alanngua	Psammite	64.9741	-52.4151	Kirkland et al., 2018 PR
315	315 - 65	2969.67	18.441	S	-1.07428	0.280849	7.1e-05	0.00105	0.0383	1.88656	0.00026	This work	0.280789	7.2e-05	-2.86037	2.56347	3302.72	3496.98	Alanngua	Psammite	64.9741	-52.4151	Kirkland et al., 2018 PR
315	315 - 66	2900.91	24.7778	D	5.59844	0.281018	7.7e-05	0.003803	0.1202	1.88663	0.00022	This work	0.280806	7.8e-05	-3.86932	2.77664	3311.5	3503.58	Alanngua	Psammite	64.9741	-52.4151	Kirkland et al., 2018 PR
315	315 - 67	2942.11	24.0683	P	-3.31011	0.280946	5.8e-05	0.002396	0.0686	1.8866	0.00018	This work	0.280811	5.8e-05	-2.74271	2.06488	3286.97	3468.7	Alanngua	Psammite	64.9741	-52.4151	Kirkland et al., 2018 PR
315	315 - 68	3023.23	27.6991	S	0.355093	0.280968	8.8e-05	0.00144	0.0523	1.88671	0.00026	This work	0.280884	8.8e-05	1.79585	3.13352	3175.61	3262.23	Alanngua	Psammite	64.9741	-52.4151	Kirkland et al., 2018 PR
315	315 - 69	3021.09	29.1635	P	-3.20344	0.280918	6.8e-05	0.00182	0.0601	1.88678	0.0002	This work	0.280812	6.8e-05	-0.817931	2.42135	3275.45	3415.78	Alanngua	Psammite	64.9741	-52.4151	Kirkland et al., 2018 PR
315	315 - 70	2910.94	17.6836	D	-5.05141	0.280856	6e-05	0.001637	0.0503	1.88661	0.00017	This work	0.280765	6e-05	-5.1202	2.13593	3343.82	3585.34	Alanngua	Psammite	64.9741	-52.4151	Kirkland et al., 2018 PR
215	215 - 1	2557.64	33.2814	I	2.8965	0.280834	3.1e-05	0.00116	0.0447	1.88635	0.00012	Gardiner et al., 2019	0.280777	3.2e-05	-12.9604	1.13822	3332.15	3777.43	Akia	Metagranite	65.1926	-52.2227	Kirkland et al., 2018 Lithos; Kirkland et al., 2020 EPSL
215	215 - 2	2572.34	38.8639	D	1.34603	0.280777	3.9e-05	0.000178	0.00651	1.88647	0.00011	Gardiner et al., 2019	0.280768	4e-05	-12.9378	1.42282	3324.28	3787.3	Akia	Metagranite	65.1926	-52.2227	Kirkland et al., 2018 Lithos; Kirkland et al., 2020 EPSL
215	215 - 3	3049.96	27.7175	X	1.97155	0.28086	3.3e-05	0.000982	0.0328	1.88656	0.00015	Gardiner et al., 2019	0.280802	3.4e-05	-0.48938	1.21076	3282.31	3418.7	Akia	Metagranite	65.1926	-52.2227	Kirkland et al., 2018 Lithos; Kirkland et al., 2020 EPSL
215	215 - 4	2570.39	29.2534	D	2.56028	0.280838	4.1e-05	0.000601	0.02142	1.8865	0.00015	Gardiner et al., 2019	0.280808	4.2e-05	-11.5531	1.49395	3279.57	3704.12	Akia	Metagranite	65.1926	-52.2227	Kirkland et al., 2018 Lithos; Kirkland et al., 2020 EPSL
215	215 - 5	2553.6	25.2228	I	0.366944	0.280872	3.6e-05	0.000861	0.03177	1.8865	0.00012	Gardiner et al., 2019	0.28083	3.6e-05	-11.1807	1.28048	3256.22	3669.3	Akia	Metagranite	65.1926	-52.2227	Kirkland et al., 2018 Lithos; Kirkland et al., 2020 EPSL
215	215 - 6	2627.78	31.4531	D	-0.821709	0.28082	2.8e-05	0.000434	0.01637	1.88669	0.0002	Gardiner et al., 2019	0.280798	2.8e-05	-10.5758	0.996103	3289.36	3690.27	Akia	Metagranite	65.1926	-52.2227	Kirkland et al., 2018 Lithos; Kirkland et al., 2020 EPSL
215	215 - 7	2587.84	26.2091	I	1.29954	0.280851	3.1e-05	0.000959	0.0332	1.88637	0.00016	Gardiner et al., 2019	0.280804	3.2e-05	-11.32	1.1383	3292.36	3703.69	Akia	Metagranite	65.1926	-52.2227	Kirkland et al., 2018 Lithos; Kirkland et al., 2020 EPSL
215	215 - 9	2531.31	24.1993	D	-3.59784	0.280874	3.7e-05	0.001259	0.0462	1.88627	0.00021	Gardiner et al., 2019	0.280813	3.8e-05	-12.3021	1.35155	3287.02	3718.52	Akia	Metagranite	65.1926	-52.2227	Kirkland et al., 2018 Lithos; Kirkland et al., 2020 EPSL
215	215 - 10	2733.48	31.0945	X	-1.76675	0.280891	3e-05	2.43e-05	0.00103	1.8866	0.00014	Gardiner et al., 2019	0.28089	3e-05	-4.84008	1.06752	3163.27	3431.95	Akia	Metagranite	65.1926	-52.2227	Kirkland et al., 2018 Lithos; Kirkland et al., 2020 EPSL
215	215 - 11	2528.8	28.6952	D	4.92981	0.280869	4.7e-05	0.00096	0.0333	1.88644	0.00018	Gardiner et al., 2019	0.280823	4.8e-05	-12.0222	1.70721	3268.48	3700.08	Akia	Metagranite	65.1926	-52.2227	Kirkland et al., 2018 Lithos; Kirkland et al., 2020 EPSL
215	215 - 12	2583.98	32.9384	I	-2.48076	0.280849	3.4e-05	0.000493	0.01793	1.88654	0.00014	Gardiner et al., 2019	0.280825	3.4e-05	-10.6596	1.20943	3256.13	3661.73	Akia	Metagranite	65.1926	-52.2227	Kirkland et al., 2018 Lithos; Kirkland et al., 2020 EPSL
215	215 - 13	2565.5	29.3041	D	-4.2999	0.280834	3.8e-05	0.000906	0.0327	1.88639	0.00011	Gardiner et al., 2019	0.28079	3.8e-05	-12.3399	1.35166	3310.49	3746.82	Akia	Metagranite	65.1926	-52.2227	Kirkland et al., 2018 Lithos; Kirkland et al., 2020 EPSL
215	215 - 14	2985.8	31.2351	D	-1.43428	0.280871	4e-05	0.00092	0.0288	1.88661	0.00013	Gardiner et al., 2019	0.280818	4e-05	-1.44274	1.4242	3262.47	3425.47	Akia	Metagranite	65.1926	-52.2227	Kirkland et al., 2018 Lithos; Kirkland et al., 2020 EPSL
215	215 - 15	2550.24	25.6406	D	-5.14083	0.280817	3.1e-05	0.001057	0.0333	1.88645	9.4e-05	Gardiner et al., 2019	0.280765	3.2e-05	-13.5535	1.1382	3346	3806.75	Akia	Metagranite	65.1926	-52.2227	Kirkland et al., 2018 Lithos; Kirkland et al., 2020 EPSL
215	215 - 16	2645.48	27.5764	X	-0.985581	0.280812	2.2e-05	0.001052	0.03039	1.88658	0.00015	Gardiner et al., 2019	0.280759	2.2e-05	-11.5644	0.782685	3352.23	3762.13	Akia	Metagranite	65.1926	-52.2227	Kirkland et al., 2018 Lithos; Kirkland et al., 2020 EPSL
215	215 - 18	2907.86	27.6253	D	-3.97303	0.280858	2.8e-05	0.001017	0.0329	1.88655	0.00018	Gardiner et al., 2019	0.280801	2.8e-05	-3.88665	0.996759	3287.93	3509.98	Akia	Metagranite	65.1926	-52.2227	Kirkland et al., 2018 Lithos; Kirkland et al., 2020 EPSL
215	215 - 19	2461.99	43.9167	D	6.34728	0.280852	2.3e-05	0.00083	0.03124	1.88631	0.00018	Gardiner et al., 2019	0.280813	2.4e-05	-13.9245	0.853471	3280.18	3761.45	Akia	Metagranite	65.1926	-52.2227	Kirkland et al., 2018 Lithos; Kirkland et al., 2020 EPSL
215	215 - 20	2811.43	69.8979	X	-0.636659	0.280932	4.3e-05	0.001166	0.0382	1.88656	0.00013	Gardiner et al., 2019	0.280869	4.4e-05	-3.74005	1.56598	3201.44	3426.83	Akia	Metagranite	65.1926	-52.2227	Kirkland et al., 2018 Lithos; Kirkland et al., 2020 EPSL
215	215 - 21	2489.09	34.201	P	1.28122	0.280829	3.7e-05	0.000697	0.0263	1.88661	0.00011	Gardiner et al., 2019	0.280796	3.8e-05	-13.9008	1.35142	3299.48	3780.67	Akia	Metagranite	65.1926	-52.2227	Kirkland et al., 2018 Lithos; Kirkland et al., 2020 EPSL
215	215 - 22	3049.96	43.5445	X	-4.55936	0.280905	4.4e-05	0.001493	0.0483	1.88674	0.0002	Gardiner et al., 2019	0.280818	4.4e-05	0.0468383	1.56686	3265.15	3386.9	Akia	Metagranite	65.1926	-52.2227	Kirkland et al., 2018 Lithos; Kirkland et al., 2020 EPSL
215	215 - 23	2925.47	42.4921	D	5.09802	0.2809	4.3e-05	0.000775	0.0241	1.88639	0.0002	Gardiner et al., 2019	0.280856	4.4e-05	-1.50524	1.5664	3211.94	3382.43	Akia	Metagranite	65.1926	-52.2227	Kirkland et al., 2018 Lithos; Kirkland et al., 2020 EPSL
215	215 - 24	2552.71	29.4375	D	-5.02235	0.280791	2.7e-05	0.0004	0.01397	1.8865	0.00017	Gardiner et al., 2019	0.280771	2.8e-05	-13.2816	0.995928	3324.57	3792.61	Akia	Metagranite	65.1926	-52.2227	Kirkland et al., 2018 Lithos; Kirkland et al., 2020 EPSL
215	215 - 25	2564.13	25.3379	D	-9.70993	0.28083	3.7e-05	0.000628	0.02333	1.88631	0.00022	Gardiner et al., 2019	0.280799	3.8e-05	-12.0284	1.35165	3292.38	3727.4	Akia	Metagranite	65.1926	-52.2227	Kirkland et al., 2018 Lithos; Kirkland et al., 2020 EPSL
215	215 - 26	2574.28	30.1763	D	3.54121	0.280881	6.5e-05	0.000806	0.0291	1.88663	0.00018	Gardiner et al., 2019	0.280841	6.6e-05	-10.293	2.34766	3239.7	3632.65	Akia	Metagranite	65.1926	-52.2227	Kirkland et al., 2018 Lithos; Kirkland et al., 2020 EPSL
215	215 - 27	2576.23	29.1931	I	-2.78923	0.280803	3.5e-05	0.0004413	0.0167	1.88648	0.00019	Gardiner et al., 2019	0.280781	3.6e-05	-12.3839	1.28055	3312.29	3757.61	Akia	Metagranite	65.1926	-52.2227	Kirkland et al., 2018 Lithos; Kirkland et al., 2020 EPSL
215	215 - 29	2570.39	28.2873	D	5.69176	0.280844	3.7e-05	0.0005982	0.02312	1.88645	0.00015	Gardiner et al., 2019	0.280815	3.8e-05	-11.3347	1.35167	3271.43	3691.23	Akia	Metagranite	65.1926	-52.2227	Kirkland et al., 2018 Lithos; Kirkland et al., 2020 EPSL
215	215 - 30	2315.98	52.7475	D	3.18159	0.280841	3.5e-05	0.001604	0.05605	1.88649	0.00017	Gardiner et al., 2019	0.28077	3.6e-05	-18.847	1.27977	3361.23	3940.71	Akia	Metagranite	65.1926	-52.2227	Kirkland et al., 2018 Lithos; Kirkland et al., 2020 EPSL
215	215 - 31	2536.92	25.6464	I	-2.21598	0.280856	3.1e-05	0.000739	0.02613	1.88629	0.00014	Gardiner et al., 2019	0.28082	3.2e-05	-11.9192	1.13816	3267.28	3700.19	Akia	Metagranite	65.1926	-52.2227	Kirkland et al., 2018 Lithos; Kirkland et al., 2020 EPSL
215	215 - 32	2377.5	46.7802	P	0.377567	0.280833	3.8e-05	0.001276	0.0456	1.88632	0.00014	Gardiner et al., 2019	0.280775	3.8e-05	-17.2397	1.35106	3343.47	3892.67	Akia	Metagranite	65.1926	-52.2227	Kirkland et al., 2018 Lithos; Kirkland et al., 2020 EPSL
215	215 - 34	2549.74	31.4276	D	-5.52791	0.280868	6.4e-05	0.000586	0.0209	1.88649	0.00018	Gardiner et al., 2019	0.280839	6.4e-05	-10.9339	2.27639	3238.76	3651.78	Akia	Metagranite	65.1926	-52.2227	Kirkland et al., 2018 Lithos; Kirkland et al., 2020 EPSL
215	215 - 35	2525.49	22.1418	D	1.67739	0.280859	4e-05	0.001245	0.04527	1.88646	0.00019	Gardiner et al., 2019	0.280799	4e-05	-12.9426	1.42266	3305.95	3751.88	Akia	Metagranite	65.1926	-52.2227	Kirkland et al., 2018 Lithos; Kirkland et al., 2020 EPSL
215	215 - 36	2581.08	31.0601	I	-2.56291	0.280816	2.3e-05	0.0004659	0.01767	1.88648	0.00016	Gardiner et al., 2019	0.280793	2.4e-05	-11.8528	0.853709	3297.27	3729.97	Akia	Metagranite	65.1926	-52.2227	Kirkland et al., 2018 Lithos; Kirkland et al., 2020 EPSL
215	215 - 37	2566.48	27.3561	D	-4.19379	0.280837	3.7e-05	0.000796	0.03077	1.88657	0.00016	Gardiner et al., 2019	0.280798	3.8e-05	-12.0188	1.35166	3297.22	3728.63	Akia	Metagranite	65.1926	-52.2227	Kirkland et al., 2018 Lithos; Kirkland et al., 2020 EPSL
215	215 - 38	2567.45	28.3157	D	-6.44862	0.280894	3.7e-05	0.000484	0.0175	1.88638	0.00018	Gardiner et al., 2019	0.28087	3.8e-05	-9.42409	1.35166	3196.16	3576.03	Akia	Metagranite	65.1926	-52.2227	Kirkland et al., 2018 Lithos; Kirkland et al., 2020 EPSL
215	215 - 39	2484.95	36.3036	P	-0.824978	0.280831	3.3e-05	0.0017524	0.06665	1.88641	0.00014	Gardiner et al., 2019	0.280748	3.4e-05	-15.7065	1.20915	3387.85	3883.91	Akia	Metagranite	65.1926	-52.2227	Kirkland et al., 2018 Lithos; Kirkland et al., 2020 EPSL
215	215 - 40	2558.82	23.5252	D	-0.158658	0.280822	3.3e-05	0.0005331	0.01924	1.88635	0.00018	Gardiner et al., 2019	0.280796	3.4e-05	-12.2695	1.20936	3294.99	3737.58	Akia	Metagranite	65.1926	-52.2227	Kirkland et al., 2018 Lithos; Kirkland et al., 2020 EPSL
323	323 - 1	2804.82	36.0052	X2	0.284885	0.280899	3.6e-05	0.0003129	0.01059	1.88637	0.00017	Gardiner et al., 2020	0.280882	3.6e-05	-3.43234	1.28124	3175.81	3403.47	Alanngua	Kimberlite	65.3879	-52.4014	Gardiner et al., 2020 EPSL
323	323 - 4	2835.14	33.9449	X2	-1.40184	0.280759	3.5e-05	0.00039	0.01257	1.88663	0.00021	Gardiner et al., 2020	0.280738	3.6e-05	-7.85765	1.28133	3365.65	3688.72	Alanngua	Kimberlite	65.3879	-52.4014	Gardiner et al., 2020 EPSL
323	323 - 5	3002.48	38.8651	X2	-0.776998	0.280771	4.7e-05	0.000301	0.01031	1.88658	0.00015	Gardiner et al., 2020	0.280754	4.8e-05	-3.3496	1.70911	3342.42	3551.3	Alanngua	Kimberlite	65.3879	-52.4014	Gardiner et al., 2020 EPSL
323	323 - 6	2961.53	60.7245	X2	4.6044	0.280679	3.4e-05	0.0002627	0.00789	1.88642	0.00014	Gardiner et al., 2020	0.280664	3.4e-05	-7.50542	1.2105	3459.21	3765.08	Alanngua	Kimberlite	65.3879	-52.4014	Gardiner et al., 2020 EPSL
323	323 - 7	3498.34	45.9426	X2	3.30779	0.280452	2.8e-05	9.8e-05	0.00321	1.88631	0.00017	Gardiner et al., 2020	0.280445	2.8e-05	-2.56003	0.998156	3738.73	3888.71	Alanngua	Kimberlite	65.3879	-52.4014	Gardiner et al., 2020 EPSL
323	323 - 8	2465.14	61.3773	X	2.65475	0.280748	5.9e-05	0.000361	0.0129	1.88492	0.00057	Gardiner et al., 2020	0.280731	6e-05	-16.7656	2.13369	3377.58	3931.18	Alanngua	Kimberlite	65.3879	-52.4014	Gardiner et al., 2020 EPSL
323	323 - 10	3028.9	27.2215	D	2.673	0.280833	3.6e-05	0.0004114	0.01436	1.88602	0.00015	Gardiner et al., 2020	0.280809	3.6e-05	-0.752097	1.28191	3270.42	3417.93	Alanngua	Kimberlite	65.3879	-52.4014	Gardiner et al., 2020 EPSL
323	323 - 11	2968.93	32.1696	X2	0.831	0.280841	4.1e-05	0.001097	0.03657	1.88653	0.00016	Gardiner et al., 2020	0.280778	4.2e-05	-3.25744	1.49535	3317.4	3519.92	Alanngua	Kimberlite	65.3879	-52.4014	Gardiner et al., 2020 EPSL
323	323 - 12	2987.26	26.1696	X2	0.36247	0.280805	3.6e-05	0.001179	0.03959	1.88641	0.00014	Gardiner et al., 2020	0.280737	3.6e-05	-4.28814	1.28179	3372.56	3595.04	Alanngua	Kimberlite	65.3879	-52.4014	Gardiner et al., 2020 EPSL
323	323 - 13	3055.52	35.2148	D	7.26674	0.280826	3.6e-05	0.000334	0.01294	1.88635	0.00022	Gardiner et al., 2020	0.280806	3.6e-05	-0.217745	1.28199	3273.21	3406.91	Alanngua	Kimberlite	65.3879	-52.4014	Gardiner et al., 2020 EPSL
323	323 - 14	2496.3	42.2136	X	4.01212	0.280646	2.4e-05	0.000663	0.02471	1.88617	0.00014	Gardiner et al., 2020	0.280614	2.4e-05	-20.1866	0.85354	3537.76	4155.5	Alanngua	Kimberlite	65.3879	-52.4014	Gardiner et al., 2020 EPSL
323	323 - 15	3002.48	38.8651	D	4.11209	0.280876	4.3e-05	0.000336	0.01018	1.88641	0.00014	Gardiner et al., 2020	0.280857	4.4e-05	0.317227	1.56669	3207.84	3333.97	Alanngua	Kimberlite	65.3879	-52.4014	Gardiner et al., 2020 EPSL
323	323 - 16	2463.04	55.2633	X	0.577151	0.280644	4.2e-05	0.0005017	0.01819	1.88643	0.00015	Gardiner et al., 2020	0.28062	4.2e-05	-20.7479	1.49358	3525.96	4163.27	Alanngua	Kimberlite	65.3879	-52.4014	Gardiner et al., 2020 EPSL
323	323 - 17	2498.35	45.2057	D	-5.95918	0.280669	3.9e-05	0.0005215	0.0192	1.88591	0.00023	Gardiner et al., 2020	0.280644	4e-05	-19.0813	1.42257	3494.96	4092.3	Alanngua	Kimberlite	65.3879	-52.4014	Gardiner et al., 2020 EPSL
323	323 - 18	2965.24	25.6251	D	4.62542	0.280876	2.9e-05	0.001407	0.0493	1.8864	0.00017	Gardiner et al., 2020	0.280796	3e-05	-2.72392	1.0681	3296.94	3485.47	Alanngua	Kimberlite	65.3879	-52.4014	Gardiner et al., 2020 EPSL
323	323 - 20	2971.14	30.6841	D	8.44099	0.280802	3.1e-05	0.000945	0.0332	1.88659	0.00021	Gardiner et al., 2020	0.280748	3.2e-05	-4.28681	1.13932	3356.34	3582.52	Alanngua	Kimberlite	65.3879	-52.4014	Gardiner et al., 2020 EPSL
323	323 - 21	2688.36	38.7355	X2	1.89595	0.280553	2.9e-05	0.0004078	0.013646	1.88631	0.00011	Gardiner et al., 2020	0.280532	3e-05	-18.6266	1.0674	3636.37	4209.42	Alanngua	Kimberlite	65.3879	-52.4014	Gardiner et al., 2020 EPSL
323	323 - 22	2945.12	29.5053	D	6.0587	0.280809	3.5e-05	0.000286	0.0104	1.88627	0.00019	Gardiner et al., 2020	0.280793	3.6e-05	-3.30816	1.28166	3291.49	3504.51	Alanngua	Kimberlite	65.3879	-52.4014	Gardiner et al., 2020 EPSL
323	323 - 23	2981.5	22.738	X2	-1.64845	0.280883	4.5e-05	0.001313	0.03803	1.88624	0.00017	Gardiner et al., 2020	0.280808	4.6e-05	-1.91542	1.63782	3279.52	3450.16	Alanngua	Kimberlite	65.3879	-52.4014	Gardiner et al., 2020 EPSL
323	323 - 24	2483.91	50.61	X	1.32399	0.28063	3.8e-05	0.000428	0.01523	1.88627	0.00013	Gardiner et al., 2020	0.28061	3.8e-05	-20.6419	1.3514	3537.7	4172.82	Alanngua	Kimberlite	65.3879	-52.4014	Gardiner et al., 2020 EPSL
323	323 - 25	3602.14	28.3466	X2	1.39124	0.280405	3.4e-05	0.0006411	0.0239	1.88641	0.00014	Gardiner et al., 2020	0.28036	3.4e-05	-3.10999	1.21235	3851.54	4001.44	Alanngua	Kimberlite	65.3879	-52.4014	Gardiner et al., 2020 EPSL
323	323 - 26	2418.19	55.4789	X	1.61131	0.280637	3.4e-05	0.0004303	0.01574	1.88642	0.00015	Gardiner et al., 2020	0.280617	3.4e-05	-21.9087	1.20896	3528.76	4197.43	Alanngua	Kimberlite	65.3879	-52.4014	Gardiner et al., 2020 EPSL
323	323 - 27	2737.83	54.1384	X2	1.78367	0.280635	3e-05	0.000434	0.016786	1.88623	0.00013	Gardiner et al., 2020	0.280612	3e-05	-14.6122	1.06753	3531.7	4011.83	Alanngua	Kimberlite	65.3879	-52.4014	Gardiner et al., 2020 EPSL
323	323 - 28	2522.76	58.5609	D	-6.31966	0.280666	3.4e-05	0.0003213	0.01132	1.88635	0.00015	Gardiner et al., 2020	0.280651	3.4e-05	-18.2837	1.20926	3481.27	4063.99	Alanngua	Kimberlite	65.3879	-52.4014	Gardiner et al., 2020 EPSL
323	323 - 29	2470.38	49.9215	X	1.24765	0.280628	4.3e-05	0.000655	0.02419	1.88622	0.00019	Gardiner et al., 2020	0.280597	4.4e-05	-21.4057	1.56473	3560.7	4207.31	Alanngua	Kimberlite	65.3879	-52.4014	Gardiner et al., 2020 EPSL
323	323 - 30	3568.87	24.8876	D	3.1572	0.280428	4e-05	0.0001692	0.00559	1.88621	0.00014	Gardiner et al., 2020	0.280416	4e-05	-1.91074	1.42618	3776.41	3905.33	Alanngua	Kimberlite	65.3879	-52.4014	Gardiner et al., 2020 EPSL
3	3 - 1	2723.87	23.1102	S	0.564033	0.280763	1e-05	0.000558	0.0198253	1.88681	7.3e-05	Kirkland et al., 2021	0.280734	1e-05	-10.611	0.355831	3374.72	3765.84	Akia	Stream sediment	-52.1618	65.5798	Kirkland et al., 2021 NC
3	3 - 6	2787.32	22.7211	S	-0.0863925	0.280755	1.35e-05	0.00112	0.0383115	1.88688	7.5e-05	Kirkland et al., 2021	0.280695	1.4e-05	-10.4991	0.498238	3434.14	3807.79	Akia	Stream sediment	-52.1618	65.5798	Kirkland et al., 2021 NC
3	3 - 9	1815.85	30.6048	S	-0.492539	0.281591	1.2e-05	0.0003755	0.0132441	1.8869	8.4e-05	Kirkland et al., 2021	0.281578	1.2e-05	-1.71552	0.426096	2264.03	2537.58	Akia	Stream sediment	-52.1618	65.5798	Kirkland et al., 2021 NC
3	3 - 20	2772.14	27.3135	S	2.46366	0.280837	1.35e-05	0.0007656	0.0263002	1.88691	0.0001	Kirkland et al., 2021	0.280796	1.4e-05	-7.2556	0.49822	3294.66	3604.76	Akia	Stream sediment	-52.1618	65.5798	Kirkland et al., 2021 NC
3	3 - 21	2726.5	26.4749	S	1.29755	0.280719	1.2e-05	0.0005341	0.0183938	1.88692	8.3e-05	Kirkland et al., 2021	0.280691	1.2e-05	-12.0716	0.427	3430.47	3853.88	Akia	Stream sediment	-52.1618	65.5798	Kirkland et al., 2021 NC
3	3 - 24	2727.37	24.3573	S	1.01804	0.280753	1e-05	0.0004257	0.0137037	1.88693	7.8e-05	Kirkland et al., 2021	0.280731	1e-05	-10.6401	0.355834	3376.55	3770.23	Akia	Stream sediment	-52.1618	65.5798	Kirkland et al., 2021 NC
3	3 - 25	2711.54	25.3245	S	0.643578	0.280829	1.1e-05	0.000403	0.0116931	1.88685	7.5e-05	Kirkland et al., 2021	0.280808	1.2e-05	-8.26052	0.426985	3274.98	3617.63	Akia	Stream sediment	-52.1618	65.5798	Kirkland et al., 2021 NC
3	3 - 26	2723.87	26.4974	S	0.346479	0.280779	1e-05	0.000529	0.0168481	1.88682	8.6e-05	Kirkland et al., 2021	0.280751	1e-05	-9.9878	0.355831	3351.21	3729.09	Akia	Stream sediment	-52.1618	65.5798	Kirkland et al., 2021 NC
3	3 - 27	2734.35	29.7547	S	1.73645	0.280804	1.25e-05	0.0003604	0.0113122	1.88691	8.7e-05	Kirkland et al., 2021	0.280785	1.2e-05	-8.54187	0.427008	3304.22	3651.76	Akia	Stream sediment	-52.1618	65.5798	Kirkland et al., 2021 NC
3	3 - 31	2739.56	23.0126	S	0.747567	0.280766	1.05e-05	0.00079	0.0274045	1.88678	7.9e-05	Kirkland et al., 2021	0.280725	1e-05	-10.5753	0.355844	3390.71	3775.74	Akia	Stream sediment	-52.1618	65.5798	Kirkland et al., 2021 NC
3	3 - 32	2731.74	24.3263	S	1.87588	0.280773	1e-05	0.0002804	0.00869726	1.88688	8.1e-05	Kirkland et al., 2021	0.280758	1e-05	-9.55669	0.355838	3338.08	3709.68	Akia	Stream sediment	-52.1618	65.5798	Kirkland et al., 2021 NC
3	3 - 34	2988.72	27.5538	S	1.9936	0.280753	1.35e-05	0.000953	0.0328297	1.88682	9.8e-05	Kirkland et al., 2021	0.280698	1.4e-05	-5.64467	0.498475	3422.12	3676.28	Akia	Stream sediment	-52.1618	65.5798	Kirkland et al., 2021 NC
3	3 - 35	2945.12	22.5424	S	-2.67132	0.280863	1.3e-05	0.000787	0.0251912	1.88683	9.3e-05	Kirkland et al., 2021	0.280819	1.4e-05	-2.39388	0.498423	3262	3450.35	Akia	Stream sediment	-52.1618	65.5798	Kirkland et al., 2021 NC
3	3 - 36	2797.34	25.8803	S	0.272406	0.280872	1.2e-05	0.000479	0.0171071	1.88682	6e-05	Kirkland et al., 2021	0.280846	1.2e-05	-4.88433	0.427071	3224.72	3483.8	Akia	Stream sediment	-52.1618	65.5798	Kirkland et al., 2021 NC
3	3 - 37	2979.96	24.4613	S	9.59308	0.280845	1.3e-05	0.000374	0.0105986	1.88689	8.8e-05	Kirkland et al., 2021	0.280824	1.4e-05	-1.39049	0.498464	3251.6	3417.85	Akia	Stream sediment	-52.1618	65.5798	Kirkland et al., 2021 NC
3	3 - 38	2977.03	24.1284	S	1.92507	0.280852	1.1e-05	0.000421	0.012125	1.88686	8e-05	Kirkland et al., 2021	0.280828	1.2e-05	-1.30536	0.427252	3246.26	3410.52	Akia	Stream sediment	-52.1618	65.5798	Kirkland et al., 2021 NC
3	3 - 39	2792.34	26.3243	S	1.15941	0.28075	1.1e-05	0.000459	0.0157558	1.88687	9.2e-05	Kirkland et al., 2021	0.280725	1.2e-05	-9.30407	0.427066	3383.32	3741.21	Akia	Stream sediment	-52.1618	65.5798	Kirkland et al., 2021 NC
3	3 - 41	2954.1	22.1275	S	2.09527	0.280822	1.65e-05	0.0005609	0.0178365	1.88682	8.6e-05	Kirkland et al., 2021	0.28079	1.6e-05	-3.1903	0.569639	3297.31	3504.47	Akia	Stream sediment	-52.1618	65.5798	Kirkland et al., 2021 NC
3	3 - 45	2763.64	22.4516	S	-3.62192	0.280819	1.25e-05	0.000686	0.0230191	1.8869	8.6e-05	Kirkland et al., 2021	0.280783	1.2e-05	-7.94131	0.427037	3311.77	3638.75	Akia	Stream sediment	-52.1618	65.5798	Kirkland et al., 2021 NC
3	3 - 46	2927.75	23.3823	S	-2.05104	0.280811	1.5e-05	0.000906	0.031352	1.88686	9.2e-05	Kirkland et al., 2021	0.28076	1.6e-05	-4.88312	0.569603	3341.04	3584.29	Akia	Stream sediment	-52.1618	65.5798	Kirkland et al., 2021 NC
3	3 - 47	2729.99	24.7604	S	0.632026	0.280743	1.65e-05	0.0006643	0.0228862	1.88695	8.8e-05	Kirkland et al., 2021	0.280708	1.6e-05	-11.3791	0.569338	3410.2	3815.78	Akia	Stream sediment	-52.1618	65.5798	Kirkland et al., 2021 NC
3	3 - 51	2692.85	29.3508	S	-0.628585	0.280799	1.25e-05	0.000571	0.0190935	1.88697	0.00011	Kirkland et al., 2021	0.28077	1.2e-05	-10.0693	0.426966	3328.45	3710.15	Akia	Stream sediment	-52.1618	65.5798	Kirkland et al., 2021 NC
3	3 - 56	2824.56	24.0808	S	2.07891	0.280732	1.6e-05	0.000559	0.0196571	1.88693	9.3e-05	Kirkland et al., 2021	0.280702	1.6e-05	-9.39031	0.569465	3415.56	3771	Akia	Stream sediment	-52.1618	65.5798	Kirkland et al., 2021 NC
3	3 - 58	2728.24	21.8123	S	0.90992	0.280842	1.45e-05	0.0006687	0.0204838	1.88691	7.4e-05	Kirkland et al., 2021	0.280807	1.4e-05	-7.90472	0.498169	3279.94	3609.42	Akia	Stream sediment	-52.1618	65.5798	Kirkland et al., 2021 NC
3	3 - 59	2781.43	23.5717	S	0.53036	0.280799	1.2e-05	0.0007956	0.0279459	1.88679	6.5e-05	Kirkland et al., 2021	0.280757	1.2e-05	-8.45147	0.427055	3347.52	3682.54	Akia	Stream sediment	-52.1618	65.5798	Kirkland et al., 2021 NC
3	3 - 61	2681.15	22.0679	S	1.42468	0.280851	1.35e-05	0.000647	0.0205397	1.88683	6.8e-05	Kirkland et al., 2021	0.280818	1.4e-05	-8.62753	0.498114	3266.24	3616.02	Akia	Stream sediment	-52.1618	65.5798	Kirkland et al., 2021 NC
3	3 - 63	2729.12	25.6101	S	6.24992	0.280799	1.35e-05	0.000322	0.00988979	1.88671	7.6e-05	Kirkland et al., 2021	0.280782	1.4e-05	-8.76983	0.49817	3307.56	3661.21	Akia	Stream sediment	-52.1618	65.5798	Kirkland et al., 2021 NC
3	3 - 64	2971.14	25.9482	S	0.877337	0.280761	1.45e-05	0.000458	0.0159214	1.88686	8.6e-05	Kirkland et al., 2021	0.280735	1.4e-05	-4.75757	0.498454	3368.81	3610.34	Akia	Stream sediment	-52.1618	65.5798	Kirkland et al., 2021 NC
3	3 - 65	2999.59	20.4701	S	-1.86621	0.280971	1.65e-05	0.002001	0.0668155	1.88697	7.4e-05	Kirkland et al., 2021	0.280856	1.6e-05	0.217535	0.5697	3218.48	3337.65	Akia	Stream sediment	-52.1618	65.5798	Kirkland et al., 2021 NC
3	3 - 66	2731.74	22.6389	S	-0.0932974	0.280862	1e-05	0.000756	0.0217045	1.88689	9.6e-05	Kirkland et al., 2021	0.280822	1e-05	-7.27526	0.355838	3260.75	3574.87	Akia	Stream sediment	-52.1618	65.5798	Kirkland et al., 2021 NC
3	3 - 67	2962.27	19.5612	S	0.552991	0.280917	1.6e-05	0.001392	0.042901	1.88681	0.00011	Kirkland et al., 2021	0.280838	1.6e-05	-1.30081	0.56965	3240.43	3398.82	Akia	Stream sediment	-52.1618	65.5798	Kirkland et al., 2021 NC
3	3 - 74	2716.84	21.4462	S	-0.750921	0.280767	1.1e-05	0.001016	0.0324854	1.88679	8.5e-05	Kirkland et al., 2021	0.280714	1.2e-05	-11.4788	0.42699	3409.03	3811.6	Akia	Stream sediment	-52.1618	65.5798	Kirkland et al., 2021 NC
3	3 - 75	2777.22	24.008	S	-0.916678	0.280841	1.55e-05	0.000969	0.0324135	1.8869	7e-05	Kirkland et al., 2021	0.280789	1.6e-05	-7.38192	0.569401	3306.52	3616.12	Akia	Stream sediment	-52.1618	65.5798	Kirkland et al., 2021 NC
3	3 - 78	2925.47	24.8683	S	0.000591156	0.280776	1e-05	0.0002677	0.00804563	1.8868	9.8e-05	Kirkland et al., 2021	0.280761	1e-05	-4.9058	0.356	3333.09	3583.87	Akia	Stream sediment	-52.1618	65.5798	Kirkland et al., 2021 NC
3	3 - 80	2784.8	24.7677	S	-0.0416781	0.280693	1.35e-05	0.000922	0.0328746	1.88686	7.2e-05	Kirkland et al., 2021	0.280644	1.4e-05	-12.3867	0.498235	3498.94	3916.93	Akia	Stream sediment	-52.1618	65.5798	Kirkland et al., 2021 NC
3	3 - 81	2901.68	24.3029	S	1.39319	0.280774	1.35e-05	0.00088	0.0330803	1.88688	8.1e-05	Kirkland et al., 2021	0.280725	1.4e-05	-6.74656	0.498372	3387.9	3674.29	Akia	Stream sediment	-52.1618	65.5798	Kirkland et al., 2021 NC
3	3 - 86	2978.49	30.8162	S	2.88344	0.280781	1.45e-05	0.00043829	0.0148623	1.88679	0.0001	Kirkland et al., 2021	0.280756	1.4e-05	-3.83428	0.498463	3340.9	3561.44	Akia	Stream sediment	-52.1618	65.5798	Kirkland et al., 2021 NC
3	3 - 87	2801.5	21.8314	S	-0.532943	0.280825	1.15e-05	0.001279	0.0442638	1.88685	8.5e-05	Kirkland et al., 2021	0.280756	1.2e-05	-7.9895	0.427075	3354.46	3670.67	Akia	Stream sediment	-52.1618	65.5798	Kirkland et al., 2021 NC
3	3 - 88	2737.83	29.3005	S	-0.393865	0.280765	1.2e-05	0.0004549	0.015025	1.8869	8.4e-05	Kirkland et al., 2021	0.280741	1.2e-05	-10.0253	0.427012	3363.3	3741.99	Akia	Stream sediment	-52.1618	65.5798	Kirkland et al., 2021 NC
3	3 - 96	3013.96	24.2142	S	1.6364	0.280836	1.6e-05	0.000556	0.0179345	1.88687	0.0001	Kirkland et al., 2021	0.280804	1.6e-05	-1.29187	0.569719	3278.46	3438.35	Akia	Stream sediment	-52.1618	65.5798	Kirkland et al., 2021 NC
3	3 - 97	2964.5	26.7172	S	0.779061	0.280889	1.45e-05	0.001049	0.0350195	1.88686	9.9e-05	Kirkland et al., 2021	0.280829	1.4e-05	-1.55247	0.498446	3249.25	3415.47	Akia	Stream sediment	-52.1618	65.5798	Kirkland et al., 2021 NC
3	3 - 99	2755.94	25.3978	S	-0.0391097	0.280754	1.1e-05	0.00057	0.0193492	1.8869	9.9e-05	Kirkland et al., 2021	0.280724	1.2e-05	-10.2134	0.42703	3387.58	3766.95	Akia	Stream sediment	-52.1618	65.5798	Kirkland et al., 2021 NC
3	3 - 100	2953.35	25.7384	S	0.50139	0.280789	1.2e-05	0.0004885	0.0160257	1.88677	6.9e-05	Kirkland et al., 2021	0.280761	1.2e-05	-4.23637	0.427228	3334.64	3565.8	Akia	Stream sediment	-52.1618	65.5798	Kirkland et al., 2021 NC
13	13b - 1	3049.96	29.0331	S	3.38527	0.280866	1.9e-05	0.00146	0.0505295	1.88678	0.00013	Kirkland et al., 2021	0.28078	2e-05	-1.27311	0.71221	3314.97	3465.15	Akia	Stream sediment	-51.3828	65.4347	Kirkland et al., 2021 NC
13	13b - 8	3018.25	28.0597	S	1.50646	0.28087	1.25e-05	0.001241	0.0441861	1.88684	8.1e-05	Kirkland et al., 2021	0.280798	1.2e-05	-1.39563	0.427294	3290.85	3447.82	Akia	Stream sediment	-51.3828	65.4347	Kirkland et al., 2021 NC
13	13b - 10	2983.62	20.9617	S	3.47821	0.280826	1.3e-05	0.000499	0.0175519	1.88686	9.6e-05	Kirkland et al., 2021	0.280797	1.4e-05	-2.23656	0.498469	3286.89	3470.82	Akia	Stream sediment	-51.3828	65.4347	Kirkland et al., 2021 NC
13	13b - 11	3009.67	36.0024	S	0.753549	0.280806	1.1e-05	0.000201	0.00779239	1.88691	8.7e-05	Kirkland et al., 2021	0.280794	1.2e-05	-1.72928	0.427285	3288.37	3460.95	Akia	Stream sediment	-51.3828	65.4347	Kirkland et al., 2021 NC
13	13b - 13	3001.76	26.862	S	-2.30017	0.280885	1.2e-05	0.001002	0.0339285	1.88684	8.5e-05	Kirkland et al., 2021	0.280827	1.2e-05	-0.746114	0.427277	3250.67	3396.53	Akia	Stream sediment	-51.3828	65.4347	Kirkland et al., 2021 NC
13	13b - 15	2994.53	21.8901	S	0.821395	0.280863	1.7e-05	0.000686	0.0228972	1.88698	0.00011	Kirkland et al., 2021	0.280824	1.8e-05	-1.04814	0.640905	3253.62	3408.84	Akia	Stream sediment	-51.3828	65.4347	Kirkland et al., 2021 NC
13	13b - 21	3041.57	21.4046	S	3.29332	0.280796	1.35e-05	0.0003034	0.0094195	1.8868	9.8e-05	Kirkland et al., 2021	0.280778	1.4e-05	-1.54899	0.498537	3309.94	3474.99	Akia	Stream sediment	-51.3828	65.4347	Kirkland et al., 2021 NC
13	13b - 26	3032.43	21.9936	S	-0.27303	0.28081	1.45e-05	0.000473	0.0146648	1.88688	9.5e-05	Kirkland et al., 2021	0.280782	1.4e-05	-1.6164	0.498526	3305.75	3471.89	Akia	Stream sediment	-51.3828	65.4347	Kirkland et al., 2021 NC
13	13b - 30	1830.5	22.9603	S	2.41422	0.281367	1.2e-05	0.0001144	0.00398803	1.88685	0.0001	Kirkland et al., 2021	0.281363	1.2e-05	-9.01346	0.426111	2545.63	2988.1	Akia	Stream sediment	-51.3828	65.4347	Kirkland et al., 2021 NC
13	13b - 39	3230.86	37.244	S	-1.84319	0.280577	1.7e-05	0.001946	0.0925013	1.88684	9.8e-05	Kirkland et al., 2021	0.280456	1.8e-05	-8.54525	0.641263	3750.39	4033.22	Akia	Stream sediment	-51.3828	65.4347	Kirkland et al., 2021 NC
13	13b - 40	2997.42	28.7566	S	-1.67201	0.280815	1.4e-05	0.000431	0.0131981	1.88687	7.7e-05	Kirkland et al., 2021	0.28079	1.4e-05	-2.16763	0.498485	3295.68	3477.43	Akia	Stream sediment	-51.3828	65.4347	Kirkland et al., 2021 NC
13	13b - 41	2562.56	31.9278	S	6.28604	0.280671	1.65e-05	0.000967	0.0294422	1.88678	7.7e-05	Kirkland et al., 2021	0.280624	1.6e-05	-18.3109	0.569115	3532.14	4095.71	Akia	Stream sediment	-51.3828	65.4347	Kirkland et al., 2021 NC
13	13b - 48	2979.23	22.8136	S	3.05935	0.280835	1.15e-05	0.0002671	0.00866175	1.88678	8.1e-05	Kirkland et al., 2021	0.28082	1.2e-05	-1.54593	0.427254	3255.92	3426.49	Akia	Stream sediment	-51.3828	65.4347	Kirkland et al., 2021 NC
13	13b - 50	2709.77	24.7851	S	-0.343658	0.280516	1.2e-05	0.000629	0.0219727	1.88689	6.6e-05	Kirkland et al., 2021	0.280483	1.2e-05	-19.856	0.426983	3705.21	4297.44	Akia	Stream sediment	-51.3828	65.4347	Kirkland et al., 2021 NC
2	2 - 2	2722.11	24.8188	S	0.0181477	0.280816	1e-05	0.0007269	0.0223358	1.88685	7.3e-05	Kirkland et al., 2021	0.280778	1e-05	-9.07888	0.35583	3319.19	3674.1	Akia	Stream sediment	-51.7398	65.7197	Kirkland et al., 2021 NC
2	2 - 3	2756.8	22.0763	S	-0.525813	0.28072	1.1e-05	0.000467	0.0152039	1.88681	8.3e-05	Kirkland et al., 2021	0.280695	1.2e-05	-11.21	0.427031	3423.35	3826.32	Akia	Stream sediment	-51.7398	65.7197	Kirkland et al., 2021 NC
2	2 - 7	3156.62	22.9194	S	2.03496	0.280767	1.85e-05	0.001052	0.0335187	1.88689	7.9e-05	Kirkland et al., 2021	0.280703	1.8e-05	-1.50175	0.641151	3412.18	3561.38	Akia	Stream sediment	-51.7398	65.7197	Kirkland et al., 2021 NC
2	2 - 12	2732.61	21.3663	S	-7.64084	0.280885	1.55e-05	0.001604	0.0550712	1.88691	9.4e-05	Kirkland et al., 2021	0.280801	1.6e-05	-8.01624	0.569342	3301.69	3619.36	Akia	Stream sediment	-51.7398	65.7197	Kirkland et al., 2021 NC
2	2 - 13	2786.48	20.6914	S	-1.6423	0.280783	1.25e-05	0.00124	0.0423175	1.88694	6.9e-05	Kirkland et al., 2021	0.280717	1.2e-05	-9.74974	0.42706	3407.32	3763	Akia	Stream sediment	-51.7398	65.7197	Kirkland et al., 2021 NC
2	2 - 17	2789.83	27.9573	S	1.49259	0.280707	1.3e-05	0.000566	0.0202746	1.88681	6.9e-05	Kirkland et al., 2021	0.280677	1.4e-05	-11.0961	0.498241	3449.01	3844.87	Akia	Stream sediment	-51.7398	65.7197	Kirkland et al., 2021 NC
2	2 - 19	2659.31	40.6227	S	-0.748732	0.280642	1.1e-05	0.0004188	0.0143165	1.88673	8.2e-05	Kirkland et al., 2021	0.280621	1.2e-05	-16.1522	0.426933	3521.2	4042.48	Akia	Stream sediment	-51.7398	65.7197	Kirkland et al., 2021 NC
2	2 - 22	2773.83	26.4827	S	1.18265	0.280917	1.25e-05	0.000636	0.021706	1.88682	9.6e-05	Kirkland et al., 2021	0.280883	1.2e-05	-4.12458	0.427048	3178.11	3420.63	Akia	Stream sediment	-51.7398	65.7197	Kirkland et al., 2021 NC
2	2 - 27	2723.87	24.8058	S	1.06207	0.280825	1.85e-05	0.000639	0.0187076	1.88689	9.7e-05	Kirkland et al., 2021	0.280792	1.8e-05	-8.55517	0.640496	3299.9	3644.51	Akia	Stream sediment	-51.7398	65.7197	Kirkland et al., 2021 NC
2	2 - 29	3439.95	20.4964	S	2.28866	0.280537	1.25e-05	0.001958	0.057412	1.88682	7e-05	Kirkland et al., 2021	0.280407	1.2e-05	-5.31629	0.427722	3805.76	4005.17	Akia	Stream sediment	-51.7398	65.7197	Kirkland et al., 2021 NC
2	2 - 34	2934.57	29.8915	S	1.64037	0.280808	1.35e-05	0.000634	0.0219725	1.88685	7.8e-05	Kirkland et al., 2021	0.280772	1.4e-05	-4.28809	0.498411	3321.91	3554.36	Akia	Stream sediment	-51.7398	65.7197	Kirkland et al., 2021 NC
2	2 - 35	2720.36	23.5575	S	1.21535	0.280828	1.15e-05	0.0005888	0.0184349	1.88684	8.1e-05	Kirkland et al., 2021	0.280797	1.2e-05	-8.43619	0.426994	3291.74	3634.78	Akia	Stream sediment	-51.7398	65.7197	Kirkland et al., 2021 NC
2	2 - 36	2968.93	22.4009	S	-0.0747286	0.280803	1.4e-05	0.001166	0.0396504	1.88679	0.00011	Kirkland et al., 2021	0.280737	1.4e-05	-4.7504	0.498451	3374.1	3608.21	Akia	Stream sediment	-51.7398	65.7197	Kirkland et al., 2021 NC
2	2 - 41	2752.51	22.1001	S	0.769438	0.280919	2e-05	0.000458	0.0106614	1.88691	0.00014	Kirkland et al., 2021	0.280895	2e-05	-4.2109	0.71171	3161.15	3409.3	Akia	Stream sediment	-51.7398	65.7197	Kirkland et al., 2021 NC
2	2 - 45	2978.49	22.6997	S	0.492382	0.280862	1.2e-05	0.0001845	0.00528002	1.88685	7.5e-05	Kirkland et al., 2021	0.280851	1.2e-05	-0.433603	0.427254	3213.91	3359.93	Akia	Stream sediment	-51.7398	65.7197	Kirkland et al., 2021 NC
2	2 - 47	3210.49	21.9797	S	-0.515175	0.280824	1.45e-05	0.001989	0.0735003	1.88688	9.2e-05	Kirkland et al., 2021	0.280701	1.4e-05	-0.295752	0.498736	3418.5	3531.88	Akia	Stream sediment	-51.7398	65.7197	Kirkland et al., 2021 NC
2	2 - 50	2700	30.9851	S	0.423254	0.280686	1.5e-05	0.000698	0.0247942	1.88685	9.6e-05	Kirkland et al., 2021	0.28065	1.6e-05	-14.1588	0.569298	3488.25	3956.41	Akia	Stream sediment	-51.7398	65.7197	Kirkland et al., 2021 NC
2	2 - 51	3649.22	19.9954	S	4.0948	0.280489	1.75e-05	0.0014	0.047541	1.88684	9.6e-05	Kirkland et al., 2021	0.28039	1.8e-05	-0.917323	0.641903	3814.98	3909.47	Akia	Stream sediment	-51.7398	65.7197	Kirkland et al., 2021 NC
2	2 - 52	2687.46	21.1606	S	5.42658	0.280756	1.3e-05	0.0008681	0.02769	1.88681	6.9e-05	Kirkland et al., 2021	0.280711	1.4e-05	-12.2673	0.498121	3410.72	3835.61	Akia	Stream sediment	-51.7398	65.7197	Kirkland et al., 2021 NC
2	2 - 56	3663.67	20.5844	S	2.32881	0.280376	1.15e-05	0.0006731	0.0180283	1.88685	0.0001	Kirkland et al., 2021	0.280328	1.2e-05	-2.78038	0.42795	3892.55	4029.86	Akia	Stream sediment	-51.7398	65.7197	Kirkland et al., 2021 NC
2	2 - 57	3403.06	20.1492	S	8.06513	0.280464	1.35e-05	0.000774	0.0202922	1.88686	6.4e-05	Kirkland et al., 2021	0.280413	1.4e-05	-5.97753	0.498965	3787.15	4015.42	Akia	Stream sediment	-51.7398	65.7197	Kirkland et al., 2021 NC
2	2 - 59	2995.25	27.1434	S	2.20741	0.280902	1.6e-05	0.002	0.070377	1.88686	9e-05	Kirkland et al., 2021	0.280787	1.6e-05	-2.33363	0.569694	3312.88	3485.58	Akia	Stream sediment	-51.7398	65.7197	Kirkland et al., 2021 NC
2	2 - 60	2411.67	23.673	S	9.12682	0.280784	1.15e-05	0.001629	0.0474549	1.88695	7.6e-05	Kirkland et al., 2021	0.280709	1.2e-05	-18.7947	0.426686	3440.5	4009.95	Akia	Stream sediment	-51.7398	65.7197	Kirkland et al., 2021 NC
2	2 - 61	3131.2	21.8082	S	7.85642	0.28051	8.5e-06	0.000581	0.0185485	1.88687	7.7e-05	Kirkland et al., 2021	0.280475	8e-06	-10.2289	0.284939	3708.56	4055.34	Akia	Stream sediment	-51.7398	65.7197	Kirkland et al., 2021 NC
2	2 - 66	2724.74	21.4061	S	-5.13144	0.28081	1.25e-05	0.00081	0.0225426	1.88681	9.2e-05	Kirkland et al., 2021	0.280768	1.2e-05	-9.38629	0.426998	3334.18	3694.26	Akia	Stream sediment	-51.7398	65.7197	Kirkland et al., 2021 NC
2	2 - 72	3694.32	22.7755	S	-0.861315	0.280433	1.05e-05	0.000818	0.0263921	1.88682	5.8e-05	Kirkland et al., 2021	0.280375	1e-05	-0.396955	0.356652	3832.09	3914.03	Akia	Stream sediment	-51.7398	65.7197	Kirkland et al., 2021 NC
2	2 - 73	2904.77	29.1141	S	7.36996	0.280557	1.15e-05	0.000571	0.0181572	1.88677	9.7e-05	Kirkland et al., 2021	0.280525	1.2e-05	-13.7874	0.427179	3646.14	4090.65	Akia	Stream sediment	-51.7398	65.7197	Kirkland et al., 2021 NC
2	2 - 75	2986.53	24.7651	S	8.91279	0.280835	1.75e-05	0.00133	0.0466797	1.88685	6.9e-05	Kirkland et al., 2021	0.280759	1.8e-05	-3.54488	0.640893	3345.46	3550.53	Akia	Stream sediment	-51.7398	65.7197	Kirkland et al., 2021 NC
2	2 - 79	2808.13	22.1963	S	-0.162173	0.280939	2.3e-05	0.001002	0.031832	1.8868	9e-05	Kirkland et al., 2021	0.280885	2.4e-05	-3.25172	0.854164	3178.61	3395.31	Akia	Stream sediment	-51.7398	65.7197	Kirkland et al., 2021 NC
2	2 - 83	3012.53	26.2958	S	1.67079	0.280928	1.65e-05	0.001696	0.0578675	1.88682	9.8e-05	Kirkland et al., 2021	0.28083	1.6e-05	-0.397739	0.569717	3251.24	3384.22	Akia	Stream sediment	-51.7398	65.7197	Kirkland et al., 2021 NC
2	2 - 88	3250.94	34.8047	S	-0.140099	0.280553	1.1e-05	0.000594	0.0192689	1.88684	6.9e-05	Kirkland et al., 2021	0.280516	1.2e-05	-5.93747	0.427529	3653.5	3895.7	Akia	Stream sediment	-51.7398	65.7197	Kirkland et al., 2021 NC
2	2 - 89	2749.93	25.4451	S	-4.13847	0.280675	1.75e-05	0.000879	0.0330415	1.88674	8.7e-05	Kirkland et al., 2021	0.280629	1.8e-05	-13.7428	0.640535	3518.92	3970	Akia	Stream sediment	-51.7398	65.7197	Kirkland et al., 2021 NC
2	2 - 90	2729.99	25.1819	S	1.31512	0.280819	1.2e-05	0.0007332	0.0224316	1.88684	7.8e-05	Kirkland et al., 2021	0.280781	1.2e-05	-8.80297	0.427004	3315.75	3663.84	Akia	Stream sediment	-51.7398	65.7197	Kirkland et al., 2021 NC
2	2 - 91	2795.68	26.6975	S	1.86429	0.280931	1.9e-05	0.001528	0.0585841	1.88676	8.1e-05	Kirkland et al., 2021	0.280849	2e-05	-4.82355	0.711783	3232.96	3478.92	Akia	Stream sediment	-51.7398	65.7197	Kirkland et al., 2021 NC
2	2 - 95	2939.85	30.5549	S	1.42511	0.280769	9.5e-06	0.000414	0.0126054	1.88684	8.8e-05	Kirkland et al., 2021	0.280746	1e-05	-5.1124	0.356012	3354.58	3607.18	Akia	Stream sediment	-51.7398	65.7197	Kirkland et al., 2021 NC
2	2 - 99	3029.6	28.8689	S	47.6392	0.280778	1.65e-05	0.00099	0.0352846	1.88688	9.7e-05	Kirkland et al., 2021	0.28072	1.6e-05	-3.89303	0.56974	3392.13	3604.39	Akia	Stream sediment	-51.7398	65.7197	Kirkland et al., 2021 NC
2	2 - 100	2990.9	31.7138	S	-0.383902	0.280809	1.8e-05	0.000731	0.0251233	1.88685	9.1e-05	Kirkland et al., 2021	0.280767	1.8e-05	-3.14679	0.640899	3328.79	3530.35	Akia	Stream sediment	-51.7398	65.7197	Kirkland et al., 2021 NC
7	7 - 8	3006.08	23.5762	S	-2.16651	0.280828	1.2e-05	0.000921	0.0293308	1.88691	9.6e-05	Kirkland et al., 2021	0.280775	1.2e-05	-2.5102	0.427281	3319.73	3504.42	Akia	Stream sediment	-50.6059	64.9505	Kirkland et al., 2021 NC
7	7 - 20	2977.76	29.7709	S	5.75368	0.280915	1.5e-05	0.00114	0.0365297	1.88684	0.0001	Kirkland et al., 2021	0.28085	1.6e-05	-0.508684	0.56967	3222.06	3363.82	Akia	Stream sediment	-50.6059	64.9505	Kirkland et al., 2021 NC
7	7 - 21	2854.48	21.9373	S	-6.42554	0.280833	1.25e-05	0.0005676	0.0180614	1.88687	6.8e-05	Kirkland et al., 2021	0.280802	1.2e-05	-5.12019	0.427129	3283.38	3541.81	Akia	Stream sediment	-50.6059	64.9505	Kirkland et al., 2021 NC
7	7 - 24	3199.26	22.6515	S	1.07093	0.280825	1.5e-05	0.00155	0.0529138	1.88681	0.00011	Kirkland et al., 2021	0.28073	1.6e-05	0.451625	0.569969	3378.11	3478.92	Akia	Stream sediment	-50.6059	64.9505	Kirkland et al., 2021 NC
7	7 - 32	2990.17	24.0353	S	1.54915	0.280828	1.65e-05	0.000913	0.0280637	1.88675	8.8e-05	Kirkland et al., 2021	0.280776	1.6e-05	-2.85913	0.569687	3319.05	3512.77	Akia	Stream sediment	-50.6059	64.9505	Kirkland et al., 2021 NC
7	7 - 34	2996.7	21.5369	S	-1.03852	0.280837	1.4e-05	0.001075	0.0342204	1.88685	0.00011	Kirkland et al., 2021	0.280775	1.4e-05	-2.72064	0.498484	3320.86	3509.62	Akia	Stream sediment	-50.6059	64.9505	Kirkland et al., 2021 NC
7	7 - 38	2982.89	21.2561	S	-2.93399	0.280849	1.5e-05	0.001158	0.0356308	1.88678	9.3e-05	Kirkland et al., 2021	0.280783	1.6e-05	-2.77841	0.569677	3311.91	3502.35	Akia	Stream sediment	-50.6059	64.9505	Kirkland et al., 2021 NC
7	7 - 41	3677.08	20.0862	S	-1.17672	0.280429	1.2e-05	0.0010249	0.0317575	1.88675	8.7e-05	Kirkland et al., 2021	0.280356	1.2e-05	-1.46705	0.427964	3857.62	3963.36	Akia	Stream sediment	-50.6059	64.9505	Kirkland et al., 2021 NC
7	7 - 42	3203.01	31.3499	S	0.228436	0.280762	1.3e-05	0.000788	0.0257786	1.88685	0.00013	Kirkland et al., 2021	0.280713	1.4e-05	-0.0348638	0.498727	3395.83	3510.63	Akia	Stream sediment	-50.6059	64.9505	Kirkland et al., 2021 NC
7	7 - 47	3092.52	27.5747	S	-0.884153	0.280881	1.65e-05	0.001099	0.031036	1.88679	0.0001	Kirkland et al., 2021	0.280816	1.6e-05	0.988278	0.569825	3264.13	3364.11	Akia	Stream sediment	-50.6059	64.9505	Kirkland et al., 2021 NC
7	7 - 49	2999.59	20.4701	S	-9.59216	0.280919	1.75e-05	0.001631	0.0533423	1.88689	0.00011	Kirkland et al., 2021	0.280825	1.8e-05	-0.875146	0.640912	3257.93	3402.5	Akia	Stream sediment	-50.6059	64.9505	Kirkland et al., 2021 NC
7	7 - 50	2978.49	24.8261	S	1.24531	0.280817	1.15e-05	0.000462	0.0141676	1.8869	7.6e-05	Kirkland et al., 2021	0.280791	1.2e-05	-2.60079	0.427254	3295.63	3488.44	Akia	Stream sediment	-50.6059	64.9505	Kirkland et al., 2021 NC
7	7 - 51	2968.93	31.635	S	-2.72888	0.280901	2.1e-05	0.00144	0.0450964	1.88693	8.4e-05	Kirkland et al., 2021	0.280819	2.2e-05	-1.81725	0.783281	3266.06	3434.61	Akia	Stream sediment	-50.6059	64.9505	Kirkland et al., 2021 NC
7	7 - 52	2986.53	26.1713	S	0.0663019	0.280859	1.8e-05	0.000762	0.0248485	1.88692	8.6e-05	Kirkland et al., 2021	0.280815	1.8e-05	-1.53068	0.640893	3265.22	3431.25	Akia	Stream sediment	-50.6059	64.9505	Kirkland et al., 2021 NC
7	7 - 54	2992.35	26.8208	S	0.0302223	0.280839	1.15e-05	0.000598	0.0183326	1.88679	7.1e-05	Kirkland et al., 2021	0.280805	1.2e-05	-1.77298	0.427268	3278	3450.12	Akia	Stream sediment	-50.6059	64.9505	Kirkland et al., 2021 NC
7	7 - 57	2981.42	21.9731	S	-0.322672	0.280845	1.8e-05	0.000983	0.0304866	1.88677	0.00011	Kirkland et al., 2021	0.280789	1.8e-05	-2.5975	0.640885	3302.38	3490.51	Akia	Stream sediment	-50.6059	64.9505	Kirkland et al., 2021 NC
7	7 - 63	3057.6	24.5742	S	0.0664467	0.2808	1.55e-05	0.001054	0.0327595	1.88682	8.3e-05	Kirkland et al., 2021	0.280738	1.6e-05	-2.60116	0.569778	3368.4	3549.68	Akia	Stream sediment	-50.6059	64.9505	Kirkland et al., 2021 NC
7	7 - 69	3016.82	23.504	S	-3.63926	0.280857	1.1e-05	0.000875	0.0286713	1.88677	0.0001	Kirkland et al., 2021	0.280806	1.2e-05	-1.13587	0.427292	3277.32	3431.32	Akia	Stream sediment	-50.6059	64.9505	Kirkland et al., 2021 NC
7	7 - 72	2994.53	22.6022	S	-1.74348	0.280906	1.45e-05	0.00198	0.0623598	1.88681	0.00011	Kirkland et al., 2021	0.280792	1.4e-05	-2.16635	0.498481	3305.67	3475.11	Akia	Stream sediment	-50.6059	64.9505	Kirkland et al., 2021 NC
7	7 - 74	2987.99	21.9363	S	-0.657601	0.280861	1.7e-05	0.001109	0.031502	1.88682	8.5e-05	Kirkland et al., 2021	0.280797	1.8e-05	-2.13466	0.640895	3291.7	3468.18	Akia	Stream sediment	-50.6059	64.9505	Kirkland et al., 2021 NC
7	7 - 77	2983.62	26.548	S	-0.153803	0.280837	1.25e-05	0.000628	0.0205024	1.88686	8.3e-05	Kirkland et al., 2021	0.280801	1.2e-05	-2.10802	0.427259	3283.14	3463.21	Akia	Stream sediment	-50.6059	64.9505	Kirkland et al., 2021 NC
7	7 - 79	2676.63	23.8479	S	8.31328	0.280854	1.95e-05	0.00167	0.0523026	1.88688	8.4e-05	Kirkland et al., 2021	0.280768	2e-05	-10.4899	0.711584	3349.41	3722.56	Akia	Stream sediment	-50.6059	64.9505	Kirkland et al., 2021 NC
7	7 - 84	2951.11	22.8685	S	-0.0167963	0.280876	1.7e-05	0.001462	0.0403365	1.88681	9.4e-05	Kirkland et al., 2021	0.280793	1.8e-05	-3.15424	0.640839	3301.65	3500.03	Akia	Stream sediment	-50.6059	64.9505	Kirkland et al., 2021 NC
7	7 - 90	3730.31	25.2299	S	2.96611	0.280454	1.95e-05	0.000646	0.0183235	1.88684	0.00012	Kirkland et al., 2021	0.280407	2e-05	1.63657	0.713365	3787.96	3822.7	Akia	Stream sediment	-50.6059	64.9505	Kirkland et al., 2021 NC
7	7 - 92	2924.71	21.5583	S	2.89192	0.28092	1.35e-05	0.001407	0.044965	1.8868	7.4e-05	Kirkland et al., 2021	0.280841	1.4e-05	-2.07349	0.498399	3237.65	3415.56	Akia	Stream sediment	-50.6059	64.9505	Kirkland et al., 2021 NC
7	7 - 93	3010.38	21.4646	S	-8.69718	0.280871	2.35e-05	0.001598	0.0493112	1.88685	9.8e-05	Kirkland et al., 2021	0.280779	2.4e-05	-2.27381	0.854572	3320.12	3493.75	Akia	Stream sediment	-50.6059	64.9505	Kirkland et al., 2021 NC
5	5 - 2	3000.31	23.266	S	-2.12243	0.28085	1.55e-05	0.001676	0.0497841	1.88676	9.8e-05	Kirkland et al., 2021	0.280753	1.6e-05	-3.40807	0.569701	3355.35	3553.09	Akia	Stream sediment	-51.4218	65.1883	Kirkland et al., 2021 NC
5	5 - 7	3075.51	25.762	S	1.35408	0.280806	1.25e-05	0.000807	0.0270966	1.88673	8.4e-05	Kirkland et al., 2021	0.280758	1.2e-05	-1.45741	0.427352	3339.22	3495.87	Akia	Stream sediment	-51.4218	65.1883	Kirkland et al., 2021 NC
5	5 - 9	3048.56	22.2804	S	1.1038	0.280845	1.15e-05	0.00057	0.0177134	1.88678	8.1e-05	Kirkland et al., 2021	0.280812	1.2e-05	-0.196271	0.427324	3267.77	3400.24	Akia	Stream sediment	-51.4218	65.1883	Kirkland et al., 2021 NC
5	5 - 12	3056.22	22.9076	S	-0.123289	0.280863	1.4e-05	0.000678	0.0212272	1.88681	7.9e-05	Kirkland et al., 2021	0.280823	1.4e-05	0.396795	0.498554	3252.95	3370.99	Akia	Stream sediment	-51.4218	65.1883	Kirkland et al., 2021 NC
5	5 - 15	3054.13	25.9409	S	1.25772	0.28084	1.55e-05	0.000535	0.0156615	1.88678	8.1e-05	Kirkland et al., 2021	0.280809	1.6e-05	-0.171717	0.569773	3271.45	3403.1	Akia	Stream sediment	-51.4218	65.1883	Kirkland et al., 2021 NC
5	5 - 16	3049.96	24.6315	S	-1.53495	0.280832	1.2e-05	0.00061	0.0185692	1.88682	8.3e-05	Kirkland et al., 2021	0.280796	1.2e-05	-0.710257	0.427326	3288.24	3431.79	Akia	Stream sediment	-51.4218	65.1883	Kirkland et al., 2021 NC
5	5 - 19	3012.53	25.2609	S	-0.199642	0.280815	1.25e-05	0.000595	0.0202964	1.88691	6.6e-05	Kirkland et al., 2021	0.280781	1.2e-05	-2.15321	0.427288	3309.4	3488.28	Akia	Stream sediment	-51.4218	65.1883	Kirkland et al., 2021 NC
5	5 - 20	3028.9	22.7388	S	4.33654	0.280836	1.75e-05	0.000647	0.0215769	1.88675	9.7e-05	Kirkland et al., 2021	0.280798	1.8e-05	-1.13336	0.640957	3286.05	3440.54	Akia	Stream sediment	-51.4218	65.1883	Kirkland et al., 2021 NC
5	5 - 23	3063.83	22.1913	S	0.885953	0.280795	1.05e-05	0.000499	0.016068	1.88691	7e-05	Kirkland et al., 2021	0.280766	1e-05	-1.47313	0.356116	3327.64	3487.74	Akia	Stream sediment	-51.4218	65.1883	Kirkland et al., 2021 NC
5	5 - 25	3007.51	26.6851	S	1.52027	0.280886	1.4e-05	0.001082	0.0329836	1.88682	0.00011	Kirkland et al., 2021	0.280824	1.4e-05	-0.74309	0.498497	3256.02	3400.81	Akia	Stream sediment	-51.4218	65.1883	Kirkland et al., 2021 NC
5	5 - 29	2910.94	27.9416	S	-0.456445	0.281019	1.75e-05	0.001338	0.0439021	1.88676	0.0001	Kirkland et al., 2021	0.280944	1.8e-05	1.27689	0.640778	3098.43	3205.77	Akia	Stream sediment	-51.4218	65.1883	Kirkland et al., 2021 NC
5	5 - 34	2963.76	30.6357	S	0.836998	0.280795	1.8e-05	0.000873	0.0299733	1.88692	9.9e-05	Kirkland et al., 2021	0.280745	1.8e-05	-4.55961	0.640858	3359.45	3592.94	Akia	Stream sediment	-51.4218	65.1883	Kirkland et al., 2021 NC
5	5 - 35	3023.23	23.4612	S	0.769762	0.280827	1.05e-05	0.0005021	0.0151409	1.88684	9.8e-05	Kirkland et al., 2021	0.280798	1e-05	-1.28565	0.356082	3285.83	3445.16	Akia	Stream sediment	-51.4218	65.1883	Kirkland et al., 2021 NC
5	5 - 36	3071.4	27.4486	S	0.606717	0.280748	1.85e-05	0.000737	0.0244034	1.88688	0.00011	Kirkland et al., 2021	0.280705	1.8e-05	-3.47074	0.641021	3409.91	3611.75	Akia	Stream sediment	-51.4218	65.1883	Kirkland et al., 2021 NC
5	5 - 51	2920.9	22.3186	S	1.44798	0.280878	1.4e-05	0.00128	0.0368359	1.88679	0.0001	Kirkland et al., 2021	0.280806	1.4e-05	-3.4014	0.498395	3283.43	3491.31	Akia	Stream sediment	-51.4218	65.1883	Kirkland et al., 2021 NC
5	5 - 52	3016.82	25.5711	S	2.60827	0.280824	1.2e-05	0.000509	0.0168096	1.88679	6.4e-05	Kirkland et al., 2021	0.280795	1.2e-05	-1.55582	0.427292	3290.35	3456.21	Akia	Stream sediment	-51.4218	65.1883	Kirkland et al., 2021 NC
5	5 - 54	2995.25	21.5446	S	1.48448	0.280929	1.75e-05	0.001727	0.0595412	1.88675	0.00011	Kirkland et al., 2021	0.28083	1.8e-05	-0.813206	0.640906	3252.52	3395.46	Akia	Stream sediment	-51.4218	65.1883	Kirkland et al., 2021 NC
5	5 - 61	3036.66	21.3273	S	-0.106942	0.280849	1.7e-05	0.000537	0.0149424	1.88675	9.1e-05	Kirkland et al., 2021	0.280818	1.8e-05	-0.262071	0.640968	3259.76	3394.89	Akia	Stream sediment	-51.4218	65.1883	Kirkland et al., 2021 NC
5	5 - 69	3040.17	22.6695	S	-1.74384	0.280847	1.35e-05	0.000553	0.0175057	1.88674	8.9e-05	Kirkland et al., 2021	0.280815	1.4e-05	-0.28484	0.498535	3263.72	3398.97	Akia	Stream sediment	-51.4218	65.1883	Kirkland et al., 2021 NC
5	5 - 74	2775.53	22.3827	S	-3.86226	0.281016	1.25e-05	0.0006396	0.0172719	1.88677	8.2e-05	Kirkland et al., 2021	0.280982	1.2e-05	-0.569216	0.427049	3047.29	3210.6	Akia	Stream sediment	-51.4218	65.1883	Kirkland et al., 2021 NC
5	5 - 75	2986.53	21.5911	S	0.242984	0.280951	1.95e-05	0.00245	0.0809596	1.8867	9.6e-05	Kirkland et al., 2021	0.280811	2e-05	-1.70137	0.712103	3284.77	3441.37	Akia	Stream sediment	-51.4218	65.1883	Kirkland et al., 2021 NC
5	5 - 76	3046.47	22.2926	S	1.23474	0.28085	1.7e-05	0.0004953	0.0150072	1.88674	8.2e-05	Kirkland et al., 2021	0.280821	1.8e-05	0.0887835	0.640983	3255.01	3381.7	Akia	Stream sediment	-51.4218	65.1883	Kirkland et al., 2021 NC
5	5 - 80	2937.59	21.1244	S	0.985573	0.280909	1.7e-05	0.001883	0.059474	1.88684	0.00013	Kirkland et al., 2021	0.280803	1.8e-05	-3.12932	0.640819	3293.15	3488.1	Akia	Stream sediment	-51.4218	65.1883	Kirkland et al., 2021 NC
5	5 - 92	3057.6	21.8917	S	-0.457904	0.280813	1.45e-05	0.000585	0.0180892	1.88685	0.0001	Kirkland et al., 2021	0.280779	1.4e-05	-1.15706	0.498556	3311.19	3464.2	Akia	Stream sediment	-51.4218	65.1883	Kirkland et al., 2021 NC
5	5 - 100	2930.79	27.3853	S	-2.51193	0.280799	1.4e-05	0.001024	0.035648	1.88688	8.1e-05	Kirkland et al., 2021	0.280741	1.4e-05	-5.47695	0.498406	3367.14	3621.73	Akia	Stream sediment	-51.4218	65.1883	Kirkland et al., 2021 NC
8	8 - 1	2581.08	23.1038	S	-0.817551	0.280846	1.2e-05	0.000468	0.0144843	1.8868	8.4e-05	Kirkland et al., 2021	0.280823	1.2e-05	-10.7893	0.426855	3258.02	3667.18	Akia	Stream sediment	-51.6676	64.3858	Kirkland et al., 2021 NC
8	8 - 3	2971.88	26.6516	S	2.30759	0.280625	1.55e-05	0.0002733	0.00944365	1.88678	7.1e-05	Kirkland et al., 2021	0.280609	1.6e-05	-9.20737	0.569663	3530.46	3873.2	Akia	Stream sediment	-51.6676	64.3858	Kirkland et al., 2021 NC
8	8 - 9	2621.2	22.4035	S	0.725441	0.280968	1.3e-05	0.000487	0.0171592	1.88683	7.9e-05	Kirkland et al., 2021	0.280944	1.4e-05	-5.5574	0.498044	3098.86	3388.05	Akia	Stream sediment	-51.6676	64.3858	Kirkland et al., 2021 NC
8	8 - 10	3050.66	26.3058	S	3.05977	0.280809	1.35e-05	0.000349	0.0118285	1.88678	8.2e-05	Kirkland et al., 2021	0.280789	1.4e-05	-0.968392	0.498548	3296.72	3447.63	Akia	Stream sediment	-51.6676	64.3858	Kirkland et al., 2021 NC
8	8 - 11	3861.66	20.4162	S	0.879962	0.280287	1e-05	0.000505	0.0176871	1.88679	9.4e-05	Kirkland et al., 2021	0.280249	1e-05	-0.850051	0.356795	3991.74	4070.8	Akia	Stream sediment	-51.6676	64.3858	Kirkland et al., 2021 NC
8	8 - 13	2799.01	23.8586	S	-2.34203	0.280887	1.25e-05	0.0004653	0.015023	1.88691	8.2e-05	Kirkland et al., 2021	0.280862	1.2e-05	-4.28575	0.427073	3203.86	3449.61	Akia	Stream sediment	-51.6676	64.3858	Kirkland et al., 2021 NC
8	8 - 15	3585.6	21.4423	S	-6.77113	0.280454	1.5e-05	0.000669	0.0227156	1.88676	8.9e-05	Kirkland et al., 2021	0.280408	1.6e-05	-1.8195	0.570494	3790.17	3912.96	Akia	Stream sediment	-51.6676	64.3858	Kirkland et al., 2021 NC
8	8 - 16	2559.61	23.2368	S	0.431214	0.280881	1.55e-05	0.00064794	0.022772	1.88675	8.5e-05	Kirkland et al., 2021	0.280849	1.6e-05	-10.3527	0.569111	3226.68	3624.96	Akia	Stream sediment	-51.6676	64.3858	Kirkland et al., 2021 NC
8	8 - 24	3204.26	27.1413	S	1.90381	0.280738	1.35e-05	0.000833	0.0283123	1.88678	0.00011	Kirkland et al., 2021	0.280687	1.4e-05	-0.959704	0.498729	3431.49	3566.3	Akia	Stream sediment	-51.6676	64.3858	Kirkland et al., 2021 NC
8	8 - 33	2688.36	28.9667	S	4.39363	0.280968	1.85e-05	0.001875	0.0666705	1.88676	0.00012	Kirkland et al., 2021	0.280871	1.8e-05	-6.54785	0.640443	3211.92	3498.47	Akia	Stream sediment	-51.6676	64.3858	Kirkland et al., 2021 NC
8	8 - 34	2985.08	27.5885	S	2.25818	0.280544	1.3e-05	0.0001838	0.0063559	1.88691	8.3e-05	Kirkland et al., 2021	0.280533	1.4e-05	-11.6	0.49847	3627.64	4023.79	Akia	Stream sediment	-51.6676	64.3858	Kirkland et al., 2021 NC
8	8 - 37	3214.22	22.8593	S	1.60508	0.280767	1.55e-05	0.001456	0.0523479	1.88685	0.00011	Kirkland et al., 2021	0.280677	1.6e-05	-1.06884	0.569989	3447.93	3580.47	Akia	Stream sediment	-51.6676	64.3858	Kirkland et al., 2021 NC
8	8 - 38	2551.72	22.8074	S	-1.03083	0.28089	1.35e-05	0.000827	0.0277947	1.8869	8.7e-05	Kirkland et al., 2021	0.28085	1.4e-05	-10.5242	0.497963	3229.49	3629.07	Akia	Stream sediment	-51.6676	64.3858	Kirkland et al., 2021 NC
8	8 - 41	2637.12	26.365	S	1.50453	0.280962	1.45e-05	0.0002409	0.00806568	1.88683	9.9e-05	Kirkland et al., 2021	0.28095	1.4e-05	-4.96136	0.498062	3087.5	3364.91	Akia	Stream sediment	-51.6676	64.3858	Kirkland et al., 2021 NC
8	8 - 42	2708	22.3511	S	0.231693	0.280731	1.6e-05	0.000341	0.0116257	1.88679	8.5e-05	Kirkland et al., 2021	0.280713	1.6e-05	-11.7152	0.569309	3398.1	3818.77	Akia	Stream sediment	-51.6676	64.3858	Kirkland et al., 2021 NC
8	8 - 46	3062.45	31.1778	S	3.20694	0.280851	1e-05	0.000508	0.0159211	1.88674	8.8e-05	Kirkland et al., 2021	0.280821	1e-05	0.47008	0.356115	3254.74	3371.49	Akia	Stream sediment	-51.6676	64.3858	Kirkland et al., 2021 NC
8	8 - 50	2952.6	30.7658	S	1.07218	0.280789	1.4e-05	0.0001679	0.00547112	1.88686	9.2e-05	Kirkland et al., 2021	0.280779	1.4e-05	-3.60685	0.498432	3307.8	3527.98	Akia	Stream sediment	-51.6676	64.3858	Kirkland et al., 2021 NC
8	8 - 54	3036.66	27.1051	S	1.60886	0.280825	1.4e-05	0.000426	0.0143084	1.88683	0.00012	Kirkland et al., 2021	0.2808	1.4e-05	-0.886129	0.498531	3282.13	3431.9	Akia	Stream sediment	-51.6676	64.3858	Kirkland et al., 2021 NC
8	8 - 56	3026.06	24.1275	S	1.73403	0.280781	1.15e-05	0.0002382	0.00747804	1.88671	7.9e-05	Kirkland et al., 2021	0.280767	1.2e-05	-2.31139	0.427302	3324.1	3508.12	Akia	Stream sediment	-51.6676	64.3858	Kirkland et al., 2021 NC
8	8 - 65	3040.87	25.715	S	2.38632	0.28079	1.9e-05	0.0003146	0.0101006	1.88671	9e-05	Kirkland et al., 2021	0.280772	2e-05	-1.80237	0.712194	3318.72	3489.45	Akia	Stream sediment	-51.6676	64.3858	Kirkland et al., 2021 NC
8	8 - 67	3023.23	27.9124	S	3.64082	0.280792	1.5e-05	0.000251	0.00851397	1.8869	8.1e-05	Kirkland et al., 2021	0.280777	1.6e-05	-2.01275	0.569732	3310.8	3488.24	Akia	Stream sediment	-51.6676	64.3858	Kirkland et al., 2021 NC
8	8 - 69	2808.13	21.7956	S	-0.429162	0.281104	1.45e-05	0.002592	0.0845698	1.88685	6.3e-05	Kirkland et al., 2021	0.280964	1.4e-05	-0.425289	0.498262	3084.02	3227.3	Akia	Stream sediment	-51.6676	64.3858	Kirkland et al., 2021 NC
8	8 - 70	3051.35	23.2751	S	3.10858	0.280817	1.3e-05	0.000353	0.0116496	1.88684	7.6e-05	Kirkland et al., 2021	0.280796	1.4e-05	-0.675562	0.498548	3286.57	3430.82	Akia	Stream sediment	-51.6676	64.3858	Kirkland et al., 2021 NC
8	8 - 76	2552.71	23.758	S	1.03096	0.280841	1.4e-05	0.00092	0.0312115	1.8868	8.1e-05	Kirkland et al., 2021	0.280796	1.4e-05	-12.406	0.497964	3302.37	3740.97	Akia	Stream sediment	-51.6676	64.3858	Kirkland et al., 2021 NC
8	8 - 84	2998.87	25.7181	S	2.25715	0.280808	1.55e-05	0.0004875	0.0161152	1.88681	0.0001	Kirkland et al., 2021	0.28078	1.6e-05	-2.49902	0.569699	3309.59	3498.18	Akia	Stream sediment	-51.6676	64.3858	Kirkland et al., 2021 NC
8	8 - 85	3045.07	26.3543	S	1.42851	0.280781	1.4e-05	0.000254	0.00818345	1.88677	0.00011	Kirkland et al., 2021	0.280766	1.4e-05	-1.89822	0.498541	3325.42	3498.38	Akia	Stream sediment	-51.6676	64.3858	Kirkland et al., 2021 NC
8	8 - 86	3010.38	30.445	S	2.68535	0.280797	1.4e-05	0.0001981	0.00654966	1.88676	5.8e-05	Kirkland et al., 2021	0.280786	1.4e-05	-2.02695	0.4985	3299.88	3479.13	Akia	Stream sediment	-51.6676	64.3858	Kirkland et al., 2021 NC
8	8 - 88	2779.75	29.2695	S	2.65442	0.280934	1.2e-05	0.0004146	0.0143004	1.88682	7.9e-05	Kirkland et al., 2021	0.280912	1.2e-05	-2.96351	0.427054	3137.94	3356.27	Akia	Stream sediment	-51.6676	64.3858	Kirkland et al., 2021 NC
8	8 - 95	3028.19	31.2573	S	2.0313	0.280844	1.6e-05	0.0003653	0.012071	1.88665	0.00011	Kirkland et al., 2021	0.280823	1.6e-05	-0.281439	0.569738	3252.19	3389.47	Akia	Stream sediment	-51.6676	64.3858	Kirkland et al., 2021 NC
8	8 - 99	2569.41	22.703	S	-2.67909	0.280879	1e-05	0.000805	0.0279892	1.88678	8.2e-05	Kirkland et al., 2021	0.280839	1e-05	-10.4737	0.355702	3242.28	3639.6	Akia	Stream sediment	-51.6676	64.3858	Kirkland et al., 2021 NC
8	8 - 100	3051.35	27.9745	S	3.36249	0.280802	1.7e-05	0.000502	0.0167734	1.88676	9.1e-05	Kirkland et al., 2021	0.280773	1.8e-05	-1.52077	0.640991	3318.69	3480.9	Akia	Stream sediment	-51.6676	64.3858	Kirkland et al., 2021 NC
9	9 - 1	3001.04	23.6102	S	1.13136	0.280772	1.4e-05	0.0003017	0.0100615	1.88683	9.4e-05	Kirkland et al., 2021	0.280755	1.4e-05	-3.34918	0.498489	3341.18	3550.16	Akia	Stream sediment	-51.9198	64.6534	Kirkland et al., 2021 NC
9	9 - 8	3003.2	29.8378	S	2.16657	0.280826	1.6e-05	0.000718	0.0247301	1.88677	9.7e-05	Kirkland et al., 2021	0.280785	1.6e-05	-2.23068	0.569705	3305.22	3485.64	Akia	Stream sediment	-51.9198	64.6534	Kirkland et al., 2021 NC
9	9 - 9	2913.16	19.6438	S	6.22727	0.280806	7.5e-06	7.4e-05	0.00263111	1.8868	3.9e-05	Kirkland et al., 2021	0.280802	8e-06	-3.74013	0.284792	3277.91	3505.4	Akia	Stream sediment	-51.9198	64.6534	Kirkland et al., 2021 NC
9	9 - 10	3426.16	20.304	S	8.47682	0.28041	1.1e-05	0.001056	0.0345756	1.88682	8.9e-05	Kirkland et al., 2021	0.28034	1.2e-05	-8.02854	0.427708	3885.77	4153.23	Akia	Stream sediment	-51.9198	64.6534	Kirkland et al., 2021 NC
9	9 - 15	3010.38	35.2337	S	2.1287	0.280811	1.45e-05	0.0004595	0.0145274	1.88679	9.7e-05	Kirkland et al., 2021	0.280784	1.4e-05	-2.06656	0.4985	3303.31	3481.48	Akia	Stream sediment	-51.9198	64.6534	Kirkland et al., 2021 NC
9	9 - 17	3640.57	23.5749	S	2.36087	0.280404	1.45e-05	0.000335	0.0114376	1.88681	9.1e-05	Kirkland et al., 2021	0.28038	1.4e-05	-1.47583	0.499248	3823.25	3935.5	Akia	Stream sediment	-51.9198	64.6534	Kirkland et al., 2021 NC
9	9 - 18	3200.51	27.4776	S	1.82591	0.280807	1.8e-05	0.00122	0.0370791	1.88681	8.6e-05	Kirkland et al., 2021	0.280732	1.8e-05	0.562614	0.641217	3373.45	3473.33	Akia	Stream sediment	-51.9198	64.6534	Kirkland et al., 2021 NC
9	9 - 19	2989.45	28.9446	S	1.59346	0.280876	1.25e-05	0.001304	0.045439	1.88683	8.7e-05	Kirkland et al., 2021	0.280801	1.2e-05	-1.96588	0.427265	3288.16	3459.3	Akia	Stream sediment	-51.9198	64.6534	Kirkland et al., 2021 NC
9	9 - 21	3181.6	26.4386	S	-2.11471	0.280853	1.95e-05	0.001224	0.0462619	1.88673	0.00011	Kirkland et al., 2021	0.280778	2e-05	1.76018	0.712432	3312.19	3387.64	Akia	Stream sediment	-51.9198	64.6534	Kirkland et al., 2021 NC
9	9 - 24	2993.08	22.6109	S	-0.581024	0.280747	1.3e-05	0.00053	0.0164283	1.88679	6.8e-05	Kirkland et al., 2021	0.280717	1.4e-05	-4.89273	0.49848	3393.35	3635.25	Akia	Stream sediment	-51.9198	64.6534	Kirkland et al., 2021 NC
9	9 - 26	3220.41	31.4324	S	2.30955	0.280773	1.65e-05	0.000541	0.0162872	1.8868	7.2e-05	Kirkland et al., 2021	0.280739	1.6e-05	1.30537	0.569998	3360.12	3444.82	Akia	Stream sediment	-51.9198	64.6534	Kirkland et al., 2021 NC
9	9 - 27	3192.34	28.7662	S	0.43699	0.280792	1.55e-05	0.001137	0.0406534	1.88678	7.5e-05	Kirkland et al., 2021	0.280722	1.6e-05	0.0232121	0.56996	3386.27	3498.91	Akia	Stream sediment	-51.9198	64.6534	Kirkland et al., 2021 NC
9	9 - 29	3038.76	21.9976	S	0.12143	0.280887	1.5e-05	0.001531	0.0542462	1.88669	9.2e-05	Kirkland et al., 2021	0.280798	1.6e-05	-0.926048	0.569753	3292.72	3435.9	Akia	Stream sediment	-51.9198	64.6534	Kirkland et al., 2021 NC
9	9 - 30	3241.24	27.6769	S	3.18187	0.280807	1.7e-05	0.001741	0.058746	1.88689	0.00011	Kirkland et al., 2021	0.280698	1.8e-05	0.336412	0.641279	3419.39	3518.38	Akia	Stream sediment	-51.9198	64.6534	Kirkland et al., 2021 NC
9	9 - 32	3152.09	21.6925	S	-3.25578	0.280847	1.3e-05	0.002013	0.0624998	1.88684	0.0001	Kirkland et al., 2021	0.280725	1.4e-05	-0.831073	0.498667	3389.24	3518.2	Akia	Stream sediment	-51.9198	64.6534	Kirkland et al., 2021 NC
9	9 - 35	3212.36	27.6629	S	1.54806	0.280829	1.7e-05	0.00167	0.0553951	1.88688	7.6e-05	Kirkland et al., 2021	0.280726	1.8e-05	0.626392	0.641235	3383.27	3478.76	Akia	Stream sediment	-51.9198	64.6534	Kirkland et al., 2021 NC
9	9 - 36	3129.88	23.4096	S	0.256729	0.280879	1.9e-05	0.00215	0.0646748	1.88673	6.5e-05	Kirkland et al., 2021	0.28075	2e-05	-0.479631	0.712344	3357.61	3480.16	Akia	Stream sediment	-51.9198	64.6534	Kirkland et al., 2021 NC
9	9 - 38	2799.01	23.8586	S	-5.32062	0.280953	1.4e-05	0.00056	0.0180771	1.88687	0.00011	Kirkland et al., 2021	0.280923	1.4e-05	-2.11766	0.498252	3124.43	3320.91	Akia	Stream sediment	-51.9198	64.6534	Kirkland et al., 2021 NC
9	9 - 39	3807.7	24.7973	S	1.94277	0.280326	1.1e-05	0.0005143	0.0181201	1.8868	9.7e-05	Kirkland et al., 2021	0.280288	1.2e-05	-0.760761	0.428098	3942	4023.58	Akia	Stream sediment	-51.9198	64.6534	Kirkland et al., 2021 NC
9	9 - 41	2998.87	25.3696	S	1.5217	0.280861	1.7e-05	0.00054	0.017194	1.88678	9.1e-05	Kirkland et al., 2021	0.28083	1.8e-05	-0.719535	0.640911	3244.2	3392.71	Akia	Stream sediment	-51.9198	64.6534	Kirkland et al., 2021 NC
9	9 - 44	3016.11	38.8742	S	3.04638	0.28083	1.75e-05	0.000467	0.0154974	1.88684	7.8e-05	Kirkland et al., 2021	0.280803	1.8e-05	-1.27215	0.640937	3278.97	3438.85	Akia	Stream sediment	-51.9198	64.6534	Kirkland et al., 2021 NC
9	9 - 45	3234.53	25.3886	S	3.58219	0.280815	1.75e-05	0.001376	0.0434082	1.88682	0.00012	Kirkland et al., 2021	0.280729	1.8e-05	1.27989	0.641269	3376.33	3457.32	Akia	Stream sediment	-51.9198	64.6534	Kirkland et al., 2021 NC
9	9 - 46	3212.36	21.6681	S	-3.29529	0.280764	1.2e-05	0.001012	0.034058	1.88684	8.1e-05	Kirkland et al., 2021	0.280701	1.2e-05	-0.240316	0.42749	3412.67	3530.05	Akia	Stream sediment	-51.9198	64.6534	Kirkland et al., 2021 NC
9	9 - 47	3194.23	32.96	S	1.24913	0.28074	1.4e-05	0.000604	0.0192889	1.88691	7.8e-05	Kirkland et al., 2021	0.280703	1.4e-05	-0.61914	0.498717	3408.93	3538.38	Akia	Stream sediment	-51.9198	64.6534	Kirkland et al., 2021 NC
9	9 - 50	3006.08	21.4873	S	-7.12918	0.280953	1.8e-05	0.00224	0.0732211	1.88682	7.4e-05	Kirkland et al., 2021	0.280824	1.8e-05	-0.770581	0.640922	3263.71	3401.33	Akia	Stream sediment	-51.9198	64.6534	Kirkland et al., 2021 NC
9	9 - 52	3605.42	23.1477	S	5.3563	0.280308	1.15e-05	0.0002371	0.00799415	1.88684	9.6e-05	Kirkland et al., 2021	0.280291	1.2e-05	-5.48868	0.427891	3937.91	4143.12	Akia	Stream sediment	-51.9198	64.6534	Kirkland et al., 2021 NC
9	9 - 54	3003.92	21.8478	S	-2.57279	0.280872	1.55e-05	0.000799	0.0236639	1.8868	0.0001	Kirkland et al., 2021	0.280826	1.6e-05	-0.742501	0.569706	3251.06	3397.99	Akia	Stream sediment	-51.9198	64.6534	Kirkland et al., 2021 NC
9	9 - 55	3097.24	30.4397	S	3.1411	0.280778	1.5e-05	0.001047	0.0347197	1.88682	0.00011	Kirkland et al., 2021	0.280716	1.6e-05	-2.46157	0.569831	3397.09	3572.11	Akia	Stream sediment	-51.9198	64.6534	Kirkland et al., 2021 NC
9	9 - 57	3203.64	29.2478	S	2.81359	0.280783	1.75e-05	0.0004256	0.0136423	1.8867	0.0001	Kirkland et al., 2021	0.280757	1.8e-05	1.52343	0.641222	3337.21	3418.84	Akia	Stream sediment	-51.9198	64.6534	Kirkland et al., 2021 NC
9	9 - 62	3213.6	22.8633	S	1.25478	0.280748	1.15e-05	0.0001414	0.00504694	1.88681	8.6e-05	Kirkland et al., 2021	0.280739	1.2e-05	1.13602	0.427491	3358.98	3449.55	Akia	Stream sediment	-51.9198	64.6534	Kirkland et al., 2021 NC
9	9 - 64	3808.51	22.8376	S	1.31988	0.280311	1.4e-05	0.0003185	0.0100757	1.88682	8.6e-05	Kirkland et al., 2021	0.280288	1.4e-05	-0.761981	0.499449	3942.06	4024.28	Akia	Stream sediment	-51.9198	64.6534	Kirkland et al., 2021 NC
9	9 - 66	3205.51	22.3106	S	-1.19493	0.280849	1.45e-05	0.001514	0.050734	1.88682	0.00012	Kirkland et al., 2021	0.280756	1.4e-05	1.52721	0.49873	3342.57	3420.08	Akia	Stream sediment	-51.9198	64.6534	Kirkland et al., 2021 NC
9	9 - 67	3024.65	21.0456	S	-0.171662	0.280824	1.15e-05	0.000777	0.0270024	1.88681	7.4e-05	Kirkland et al., 2021	0.280779	1.2e-05	-1.9281	0.4273	3312.84	3484.33	Akia	Stream sediment	-51.9198	64.6534	Kirkland et al., 2021 NC
9	9 - 69	3203.64	30.4453	S	0.517729	0.280801	1.9e-05	0.001275	0.0454137	1.88681	9.7e-05	Kirkland et al., 2021	0.280722	2e-05	0.299615	0.712469	3386.28	3491.33	Akia	Stream sediment	-51.9198	64.6534	Kirkland et al., 2021 NC
9	9 - 70	3233.92	28.6295	S	1.16996	0.280814	1.25e-05	0.001166	0.0417591	1.88671	8.9e-05	Kirkland et al., 2021	0.280741	1.2e-05	1.69597	0.427512	3359.4	3432.2	Akia	Stream sediment	-51.9198	64.6534	Kirkland et al., 2021 NC
9	9 - 71	3505.4	21.4101	S	0.577207	0.280432	1.5e-05	0.0002809	0.00874844	1.8868	8.4e-05	Kirkland et al., 2021	0.280413	1.6e-05	-3.54584	0.570385	3781.8	3952.03	Akia	Stream sediment	-51.9198	64.6534	Kirkland et al., 2021 NC
9	9 - 72	3224.72	29.3162	S	2.90711	0.2808	1.8e-05	0.000803	0.0262839	1.88674	9.1e-05	Kirkland et al., 2021	0.28075	1.8e-05	1.78882	0.641254	3346.83	3419.53	Akia	Stream sediment	-51.9198	64.6534	Kirkland et al., 2021 NC
9	9 - 77	3188.56	29.4118	S	0.615373	0.280817	1.3e-05	0.000651	0.0233462	1.88678	0.00011	Kirkland et al., 2021	0.280777	1.4e-05	1.88896	0.49871	3311.47	3385.43	Akia	Stream sediment	-51.9198	64.6534	Kirkland et al., 2021 NC
9	9 - 78	3238.2	26.2401	S	0.973246	0.280764	1.75e-05	0.001705	0.0612445	1.88682	0.00011	Kirkland et al., 2021	0.280658	1.8e-05	-1.18414	0.641275	3474.4	3605.89	Akia	Stream sediment	-51.9198	64.6534	Kirkland et al., 2021 NC
9	9 - 80	2986.53	27.5746	S	0.583169	0.280852	1.8e-05	0.000649	0.0208261	1.88676	8.8e-05	Kirkland et al., 2021	0.280815	1.8e-05	-1.5492	0.640893	3265.09	3432.35	Akia	Stream sediment	-51.9198	64.6534	Kirkland et al., 2021 NC
9	9 - 87	3205.51	29.2275	S	1.92968	0.280777	1.5e-05	0.000978	0.0299024	1.88673	0.0001	Kirkland et al., 2021	0.280717	1.6e-05	0.139928	0.569978	3392.42	3502.23	Akia	Stream sediment	-51.9198	64.6534	Kirkland et al., 2021 NC
9	9 - 88	3818.98	21.2134	S	1.77907	0.280368	1.3e-05	0.000779	0.0256913	1.88677	0.0001	Kirkland et al., 2021	0.28031	1.4e-05	0.306707	0.499462	3913.49	3969.87	Akia	Stream sediment	-51.9198	64.6534	Kirkland et al., 2021 NC
9	9 - 89	3000.31	21.8677	S	0.37661	0.280884	1.15e-05	0.001203	0.0360262	1.88682	6.8e-05	Kirkland et al., 2021	0.280815	1.2e-05	-1.22713	0.427276	3268.87	3423.94	Akia	Stream sediment	-51.9198	64.6534	Kirkland et al., 2021 NC
9	9 - 90	3199.26	27.7909	S	-2.70416	0.280814	1.35e-05	0.000979	0.0358253	1.88668	9.7e-05	Kirkland et al., 2021	0.280754	1.4e-05	1.31175	0.498723	3343.3	3427.98	Akia	Stream sediment	-51.9198	64.6534	Kirkland et al., 2021 NC
9	9 - 94	2659.31	35.8405	S	-9.74621	0.280768	1.6e-05	0.000536	0.0180712	1.88683	9.8e-05	Kirkland et al., 2021	0.280741	1.6e-05	-11.8816	0.569244	3366.27	3791.39	Akia	Stream sediment	-51.9198	64.6534	Kirkland et al., 2021 NC
9	9 - 99	2690.16	20.7116	S	3.47838	0.280704	1.1e-05	0.0005564	0.0171726	1.88681	7.3e-05	Kirkland et al., 2021	0.280675	1.2e-05	-13.4847	0.426964	3452.11	3909.29	Akia	Stream sediment	-51.9198	64.6534	Kirkland et al., 2021 NC
10	10 - 2	2595.54	27.182	S	0.574738	0.280993	1.55e-05	0.0009684	0.0373079	1.88675	7.4e-05	Kirkland et al., 2021	0.280945	1.6e-05	-6.1105	0.569159	3103.76	3401.15	Akia	Stream sediment	-51.1601	64.9653	Kirkland et al., 2021 NC
10	10 - 9	3761.62	20.7222	S	1.65622	0.280338	1.4e-05	0.0005663	0.0179573	1.8868	0.00012	Kirkland et al., 2021	0.280297	1.4e-05	-1.55729	0.499393	3931.55	4034.35	Akia	Stream sediment	-51.1601	64.9653	Kirkland et al., 2021 NC
10	10 - 10	2988.72	23.6938	S	-2.20998	0.280885	1.65e-05	0.001396	0.0457322	1.88683	5.3e-05	Kirkland et al., 2021	0.280805	1.6e-05	-1.84992	0.569685	3283.88	3451.87	Akia	Stream sediment	-51.1601	64.9653	Kirkland et al., 2021 NC
10	10 - 11	2717.72	23.1487	S	0.713288	0.280706	1.3e-05	0.0003744	0.012722	1.88685	8.9e-05	Kirkland et al., 2021	0.280687	1.4e-05	-12.441	0.498157	3433.66	3868.92	Akia	Stream sediment	-51.1601	64.9653	Kirkland et al., 2021 NC
10	10 - 12	3018.25	20.3854	S	-4.86206	0.281007	1.25e-05	0.001676	0.0583016	1.88686	0.00011	Kirkland et al., 2021	0.28091	1.2e-05	2.58475	0.427294	3142.17	3211.42	Akia	Stream sediment	-51.1601	64.9653	Kirkland et al., 2021 NC
10	10 - 15	2994.53	26.4523	S	2.32042	0.280858	1.35e-05	0.000899	0.0310392	1.88678	8e-05	Kirkland et al., 2021	0.280806	1.4e-05	-1.66225	0.498481	3278	3445.25	Akia	Stream sediment	-51.1601	64.9653	Kirkland et al., 2021 NC
10	10 - 18	3010.38	20.421	S	-3.21384	0.280933	1.55e-05	0.001952	0.0527813	1.88683	9.8e-05	Kirkland et al., 2021	0.28082	1.6e-05	-0.794895	0.569714	3266.32	3406.11	Akia	Stream sediment	-51.1601	64.9653	Kirkland et al., 2021 NC
10	10 - 19	2997.42	27.1234	S	1.148	0.280882	1.45e-05	0.0005119	0.017113	1.88682	8.7e-05	Kirkland et al., 2021	0.280853	1.4e-05	0.0521791	0.498485	3214.23	3345.79	Akia	Stream sediment	-51.1601	64.9653	Kirkland et al., 2021 NC
10	10 - 20	3001.76	26.0419	S	0.978984	0.280874	1.4e-05	0.000668	0.0207062	1.88686	8.2e-05	Kirkland et al., 2021	0.280835	1.4e-05	-0.452263	0.49849	3237.58	3379.09	Akia	Stream sediment	-51.1601	64.9653	Kirkland et al., 2021 NC
10	10 - 22	2985.08	26.5352	S	0.820889	0.280815	1.55e-05	0.0005052	0.0170434	1.88674	9.6e-05	Kirkland et al., 2021	0.280786	1.6e-05	-2.60691	0.56968	3301.87	3493.89	Akia	Stream sediment	-51.1601	64.9653	Kirkland et al., 2021 NC
10	10 - 23	3590.35	26.2204	S	3.20156	0.280442	1.25e-05	0.001094	0.0381489	1.88687	9.1e-05	Kirkland et al., 2021	0.280366	1.2e-05	-3.18681	0.427875	3847.26	3996.8	Akia	Stream sediment	-51.1601	64.9653	Kirkland et al., 2021 NC
10	10 - 26	3049.96	23.9582	S	1.22847	0.280905	1.2e-05	0.0004918	0.0157418	1.88679	8.4e-05	Kirkland et al., 2021	0.280876	1.2e-05	2.13594	0.427326	3182.3	3262.82	Akia	Stream sediment	-51.1601	64.9653	Kirkland et al., 2021 NC
10	10 - 29	2715.34	20.4689	S	-1.93729	0.280983	1.4e-05	0.0009376	0.0298718	1.88686	9.2e-05	Kirkland et al., 2021	0.280934	1.4e-05	-3.68201	0.498154	3114.66	3349.21	Akia	Stream sediment	-51.1601	64.9653	Kirkland et al., 2021 NC
10	10 - 31	2996.7	26.7818	S	1.64098	0.280884	1.65e-05	0.000892	0.0293578	1.88674	9.8e-05	Kirkland et al., 2021	0.280833	1.6e-05	-0.672217	0.569696	3242.85	3388.22	Akia	Stream sediment	-51.1601	64.9653	Kirkland et al., 2021 NC
10	10 - 35	2983.62	26.8996	S	0.349654	0.280877	1.35e-05	0.000757	0.0253363	1.88678	0.00011	Kirkland et al., 2021	0.280834	1.4e-05	-0.946936	0.498469	3240.96	3394.37	Akia	Stream sediment	-51.1601	64.9653	Kirkland et al., 2021 NC
10	10 - 36	2988.72	27.9037	S	1.00994	0.280867	1.35e-05	0.0006394	0.0210377	1.88674	7.4e-05	Kirkland et al., 2021	0.28083	1.4e-05	-0.94491	0.498475	3244.48	3398.21	Akia	Stream sediment	-51.1601	64.9653	Kirkland et al., 2021 NC
10	10 - 38	3688.59	22.1725	S	2.55799	0.280365	1.55e-05	0.0003869	0.012609	1.88692	7.8e-05	Kirkland et al., 2021	0.280337	1.6e-05	-1.85985	0.570635	3878.84	3995.32	Akia	Stream sediment	-51.1601	64.9653	Kirkland et al., 2021 NC
10	10 - 39	2995.98	22.5934	S	-0.335311	0.280932	1e-05	0.00103	0.0363656	1.88678	7e-05	Kirkland et al., 2021	0.280873	1e-05	0.73755	0.356059	3190.25	3303.95	Akia	Stream sediment	-51.1601	64.9653	Kirkland et al., 2021 NC
10	10 - 43	3022.52	21.7455	S	-0.828006	0.280981	2.25e-05	0.00288	0.0969004	1.88676	0.0001	Kirkland et al., 2021	0.280814	2.2e-05	-0.734025	0.78338	3280.84	3411.91	Akia	Stream sediment	-51.1601	64.9653	Kirkland et al., 2021 NC
10	10 - 46	3003.2	26.3767	S	0.958831	0.280857	1.4e-05	0.00086	0.0266081	1.88682	0.0001	Kirkland et al., 2021	0.280807	1.4e-05	-1.41847	0.498492	3276.06	3437.51	Akia	Stream sediment	-51.1601	64.9653	Kirkland et al., 2021 NC
10	10 - 47	3599.32	19.5394	S	-1.5838	0.280432	1.95e-05	0.0008207	0.0294905	1.88677	8.8e-05	Kirkland et al., 2021	0.280375	2e-05	-2.65854	0.713141	3833.67	3972.81	Akia	Stream sediment	-51.1601	64.9653	Kirkland et al., 2021 NC
10	10 - 48	3016.82	22.4681	S	-5.9423	0.280894	1.4e-05	0.000924	0.0278037	1.88682	7.8e-05	Kirkland et al., 2021	0.28084	1.4e-05	0.080518	0.498508	3232.19	3359.16	Akia	Stream sediment	-51.1601	64.9653	Kirkland et al., 2021 NC
10	10 - 49	3095.89	29.4857	S	1.50988	0.280838	1.5e-05	0.0005511	0.0184269	1.88687	7.6e-05	Kirkland et al., 2021	0.280805	1.6e-05	0.695279	0.56983	3275.42	3384.12	Akia	Stream sediment	-51.1601	64.9653	Kirkland et al., 2021 NC
10	10 - 50	2956.33	25.3549	S	0.435908	0.280848	1.25e-05	0.0007034	0.0229747	1.88674	0.00011	Kirkland et al., 2021	0.280808	1.2e-05	-2.50067	0.427231	3274.9	3465.36	Akia	Stream sediment	-51.1601	64.9653	Kirkland et al., 2021 NC
10	10 - 58	3553.4	18.7883	S	-3.26657	0.280359	1.35e-05	0.000442	0.0135955	1.8868	8.4e-05	Kirkland et al., 2021	0.280329	1.4e-05	-5.40594	0.499144	3892.01	4098.08	Akia	Stream sediment	-51.1601	64.9653	Kirkland et al., 2021 NC
10	10 - 59	3000.31	23.6151	S	-1.10484	0.280906	1.6e-05	0.00115	0.0397185	1.8868	0.00011	Kirkland et al., 2021	0.28084	1.6e-05	-0.33506	0.569701	3234.95	3371.02	Akia	Stream sediment	-51.1601	64.9653	Kirkland et al., 2021 NC
10	10 - 62	2968.93	20.9695	S	-2.56648	0.280909	1.5e-05	0.0009505	0.0295778	1.88675	7.6e-05	Kirkland et al., 2021	0.280855	1.6e-05	-0.539113	0.569659	3214.4	3358.78	Akia	Stream sediment	-51.1601	64.9653	Kirkland et al., 2021 NC
10	10 - 70	3084.38	33.8377	S	2.5273	0.280874	1.15e-05	0.0004157	0.0143691	1.88681	0.00014	Kirkland et al., 2021	0.280849	1.2e-05	1.99513	0.427361	3216.93	3297.99	Akia	Stream sediment	-51.1601	64.9653	Kirkland et al., 2021 NC
10	10 - 76	3059.68	24.2244	S	-0.245705	0.280811	1.4e-05	0.000631	0.0192637	1.88688	9.6e-05	Kirkland et al., 2021	0.280774	1.4e-05	-1.2763	0.498558	3317.7	3472.87	Akia	Stream sediment	-51.1601	64.9653	Kirkland et al., 2021 NC
10	10 - 78	2920.9	21.2081	S	-3.13582	0.280524	1.6e-05	0.000612	0.0194577	1.88679	7.9e-05	Kirkland et al., 2021	0.28049	1.6e-05	-14.6708	0.569594	3693.14	4154.65	Akia	Stream sediment	-51.1601	64.9653	Kirkland et al., 2021 NC
10	10 - 79	3008.23	27.0242	S	0.302118	0.280879	1.85e-05	0.000826	0.026234	1.88683	8.4e-05	Kirkland et al., 2021	0.280831	1.8e-05	-0.449321	0.640925	3244.01	3383.94	Akia	Stream sediment	-51.1601	64.9653	Kirkland et al., 2021 NC
10	10 - 80	2963.02	31.708	S	-0.315723	0.280908	1.45e-05	0.000446	0.0147926	1.88683	9e-05	Kirkland et al., 2021	0.280883	1.4e-05	0.31122	0.498444	3174.66	3303.68	Akia	Stream sediment	-51.1601	64.9653	Kirkland et al., 2021 NC
10	10 - 82	3860.1	20.2348	S	0.0120107	0.280414	1.6e-05	0.001506	0.0503111	1.88672	0.00012	Kirkland et al., 2021	0.280301	1.6e-05	0.975402	0.57087	3925.64	3962.76	Akia	Stream sediment	-51.1601	64.9653	Kirkland et al., 2021 NC
10	10 - 84	2977.76	31.5266	S	0.960552	0.280846	1.4e-05	0.000616	0.0212154	1.88681	0.0001	Kirkland et al., 2021	0.280811	1.4e-05	-1.8988	0.498462	3270.27	3446.28	Akia	Stream sediment	-51.1601	64.9653	Kirkland et al., 2021 NC
10	10 - 88	3032.43	27.1441	S	2.53083	0.280876	1.4e-05	0.00045	0.0144419	1.8867	9.7e-05	Kirkland et al., 2021	0.28085	1.4e-05	0.781496	0.498526	3217.09	3329.67	Akia	Stream sediment	-51.1601	64.9653	Kirkland et al., 2021 NC
10	10 - 89	3006.8	31.8614	S	1.2396	0.280871	1.35e-05	0.000636	0.0195961	1.88687	9.7e-05	Kirkland et al., 2021	0.280834	1.4e-05	-0.376628	0.498496	3238.91	3378.51	Akia	Stream sediment	-51.1601	64.9653	Kirkland et al., 2021 NC
10	10 - 90	2986.53	24.7651	S	-1.89471	0.280884	1.15e-05	0.000765	0.026374	1.8868	7.7e-05	Kirkland et al., 2021	0.28084	1.2e-05	-0.646672	0.427262	3232.34	3378.82	Akia	Stream sediment	-51.1601	64.9653	Kirkland et al., 2021 NC
10	10 - 91	2962.27	22.4403	S	-0.656215	0.280822	8.5e-06	0.000788	0.0255484	1.88695	7.2e-05	Kirkland et al., 2021	0.280777	8e-06	-3.4603	0.284825	3316.42	3526.78	Akia	Stream sediment	-51.1601	64.9653	Kirkland et al., 2021 NC
10	10 - 92	2972.62	29.4748	S	0.94022	0.280844	1.25e-05	0.000795	0.0256122	1.88687	7.2e-05	Kirkland et al., 2021	0.280799	1.2e-05	-2.45289	0.427248	3287.86	3475.13	Akia	Stream sediment	-51.1601	64.9653	Kirkland et al., 2021 NC
10	10 - 94	3720.43	20.3077	S	-0.240941	0.28047	2.1e-05	0.001316	0.0479819	1.88691	9.9e-05	Kirkland et al., 2021	0.280375	2.2e-05	0.255886	0.784683	3832.01	3896.06	Akia	Stream sediment	-51.1601	64.9653	Kirkland et al., 2021 NC
10	10 - 96	2791.5	24.7179	S	-1.63782	0.280576	8.5e-06	0.000281	0.00854088	1.88678	6.7e-05	Kirkland et al., 2021	0.280561	8e-06	-15.177	0.28471	3594.9	4085.79	Akia	Stream sediment	-51.1601	64.9653	Kirkland et al., 2021 NC
10	10 - 99	2775.87	19.7132	S	2.33514	0.280792	1.2e-05	0.000741	0.020833	1.8868	6.6e-05	Kirkland et al., 2021	0.280753	1.2e-05	-8.72496	0.42705	3352.12	3694.42	Akia	Stream sediment	-51.1601	64.9653	Kirkland et al., 2021 NC
10	10 - 100	3003.2	22.8986	S	1.52794	0.280898	1.6e-05	0.001742	0.0554458	1.88684	8.8e-05	Kirkland et al., 2021	0.280798	1.6e-05	-1.76977	0.569705	3295.95	3458.33	Akia	Stream sediment	-51.1601	64.9653	Kirkland et al., 2021 NC
11	11 - 2	2985.8	25.1226	S	0.041901	0.280877	1.15e-05	0.000662	0.0231503	1.88688	8e-05	Kirkland et al., 2021	0.280839	1.2e-05	-0.702491	0.427261	3233.12	3381.57	Akia	Stream sediment	-52.0271	65.4303	Kirkland et al., 2021 NC
11	11 - 4	2990.17	22.2764	S	0.0793879	0.280836	1.5e-05	0.0009551	0.0312902	1.88677	9.6e-05	Kirkland et al., 2021	0.280781	1.6e-05	-2.66035	0.569687	3311.99	3501	Akia	Stream sediment	-52.0271	65.4303	Kirkland et al., 2021 NC
11	11 - 5	2698.21	29.2944	S	-0.851782	0.28069	1.6e-05	0.00025179	0.00877165	1.88677	5.8e-05	Kirkland et al., 2021	0.280677	1.6e-05	-13.2372	0.569296	3443.93	3900.88	Akia	Stream sediment	-52.0271	65.4303	Kirkland et al., 2021 NC
11	11 - 6	3105.31	45.8967	S	2.17095	0.28085	1.95e-05	0.000579	0.0195687	1.88665	8.4e-05	Kirkland et al., 2021	0.280815	2e-05	1.28253	0.712303	3261.92	3356.6	Akia	Stream sediment	-52.0271	65.4303	Kirkland et al., 2021 NC
11	11 - 8	2987.99	26.1588	S	2.40845	0.280852	1.5e-05	0.000265	0.00901609	1.88684	7e-05	Kirkland et al., 2021	0.280837	1.6e-05	-0.731059	0.569684	3233.51	3384.96	Akia	Stream sediment	-52.0271	65.4303	Kirkland et al., 2021 NC
11	11 - 15	2957.82	25.343	S	0.624097	0.280811	1.7e-05	0.0003951	0.0131121	1.88677	0.00011	Kirkland et al., 2021	0.280789	1.8e-05	-3.1604	0.640849	3297.93	3505.58	Akia	Stream sediment	-52.0271	65.4303	Kirkland et al., 2021 NC
11	11 - 18	2968.93	27.743	S	0.103393	0.280879	1.9e-05	0.000722	0.0244035	1.88677	0.00011	Kirkland et al., 2021	0.280838	2e-05	-1.14354	0.712073	3235.42	3394.65	Akia	Stream sediment	-52.0271	65.4303	Kirkland et al., 2021 NC
11	11 - 21	2888.46	30.0357	S	-0.0294835	0.280904	1.5e-05	0.000688	0.0238377	1.88675	0.00011	Kirkland et al., 2021	0.280866	1.6e-05	-2.04342	0.569551	3199.53	3385.72	Akia	Stream sediment	-52.0271	65.4303	Kirkland et al., 2021 NC
11	11 - 23	2602.04	20.8461	S	3.69537	0.280853	1.4e-05	0.00064	0.0208627	1.88689	6.6e-05	Kirkland et al., 2021	0.280821	1.4e-05	-10.3613	0.498021	3263.02	3657.92	Akia	Stream sediment	-52.0271	65.4303	Kirkland et al., 2021 NC
11	11 - 25	2943.62	35.1734	S	-0.589824	0.280924	1.95e-05	0.001038	0.0361788	1.88684	0.00012	Kirkland et al., 2021	0.280865	2e-05	-0.761625	0.712031	3201.59	3352.36	Akia	Stream sediment	-52.0271	65.4303	Kirkland et al., 2021 NC
11	11 - 26	2859.27	34.9329	S	2.60778	0.280834	1.2e-05	0.0002527	0.0082786	1.88682	0.0001	Kirkland et al., 2021	0.28082	1.2e-05	-4.3591	0.427133	3256.05	3500.45	Akia	Stream sediment	-52.0271	65.4303	Kirkland et al., 2021 NC
11	11 - 27	2946.62	25.0706	S	0.0522789	0.28085	1.5e-05	0.000389	0.0131189	1.88686	9.9e-05	Kirkland et al., 2021	0.280828	1.6e-05	-2.02079	0.569629	3246.27	3429.39	Akia	Stream sediment	-52.0271	65.4303	Kirkland et al., 2021 NC
11	11 - 28	2826.2	28.0029	S	0.920866	0.280876	1.7e-05	0.0003718	0.0123346	1.88681	8.4e-05	Kirkland et al., 2021	0.280856	1.8e-05	-3.86634	0.64065	3210.74	3445.72	Akia	Stream sediment	-52.0271	65.4303	Kirkland et al., 2021 NC
11	11 - 29	2843.23	23.5613	S	-4.59921	0.280955	1.75e-05	0.001562	0.0514423	1.88671	0.00011	Kirkland et al., 2021	0.28087	1.8e-05	-2.96757	0.640676	3203.32	3405.57	Akia	Stream sediment	-52.0271	65.4303	Kirkland et al., 2021 NC
11	11 - 30	3043.67	23.3256	S	0.242839	0.280896	1.55e-05	0.000742	0.022905	1.88683	7.2e-05	Kirkland et al., 2021	0.280853	1.6e-05	1.14801	0.569759	3214.54	3316.64	Akia	Stream sediment	-52.0271	65.4303	Kirkland et al., 2021 NC
11	11 - 32	2977.76	29.0674	S	1.48178	0.280892	1.55e-05	0.0006695	0.0219302	1.88678	8.3e-05	Kirkland et al., 2021	0.280854	1.6e-05	-0.369893	0.56967	3213.9	3355.58	Akia	Stream sediment	-52.0271	65.4303	Kirkland et al., 2021 NC
11	11 - 33	2999.59	27.4508	S	0.582527	0.280881	1.65e-05	0.00054	0.018601	1.8868	0.00011	Kirkland et al., 2021	0.28085	1.6e-05	0.00937843	0.5697	3217.84	3350.01	Akia	Stream sediment	-52.0271	65.4303	Kirkland et al., 2021 NC
11	11 - 35	3015.39	27.6459	S	1.72349	0.28085	1e-05	0.0004249	0.0139649	1.88678	0.0001	Kirkland et al., 2021	0.280825	1e-05	-0.489821	0.356076	3249.21	3391.9	Akia	Stream sediment	-52.0271	65.4303	Kirkland et al., 2021 NC
11	11 - 37	2982.89	34.6021	S	2.33765	0.280895	1.4e-05	0.00064	0.0220309	1.88679	8.5e-05	Kirkland et al., 2021	0.280858	1.4e-05	-0.0843352	0.498468	3207.52	3342.6	Akia	Stream sediment	-52.0271	65.4303	Kirkland et al., 2021 NC
11	11 - 38	2979.23	25.5275	S	1.5028	0.280876	1.75e-05	0.0004754	0.0162237	1.88682	9.2e-05	Kirkland et al., 2021	0.280849	1.8e-05	-0.510353	0.640882	3219.16	3365.06	Akia	Stream sediment	-52.0271	65.4303	Kirkland et al., 2021 NC
11	11 - 40	2971.88	28.7761	S	-2.61345	0.280909	1.4e-05	0.00112	0.0384556	1.88681	7.3e-05	Kirkland et al., 2021	0.280845	1.4e-05	-0.815777	0.498455	3228.43	3377.49	Akia	Stream sediment	-52.0271	65.4303	Kirkland et al., 2021 NC
11	11 - 41	3002.48	28.8088	S	2.0342	0.280902	1.55e-05	0.0002943	0.00975178	1.88678	8e-05	Kirkland et al., 2021	0.280885	1.6e-05	1.3286	0.569704	3170.39	3273.87	Akia	Stream sediment	-52.0271	65.4303	Kirkland et al., 2021 NC
11	11 - 42	3063.83	20.5177	S	-7.47132	0.280904	9.5e-06	0.001024	0.0313437	1.88677	9.3e-05	Kirkland et al., 2021	0.280844	1e-05	1.30791	0.356116	3227.15	3322.82	Akia	Stream sediment	-52.0271	65.4303	Kirkland et al., 2021 NC
11	11 - 48	2981.42	34.9713	S	1.35607	0.280897	1.2e-05	0.0003752	0.0121544	1.88675	8.8e-05	Kirkland et al., 2021	0.280876	1.2e-05	0.492683	0.427257	3183.43	3307.19	Akia	Stream sediment	-52.0271	65.4303	Kirkland et al., 2021 NC
11	11 - 51	2993.08	25.0659	S	0.827701	0.280834	1.3e-05	0.00028387	0.0084382	1.88681	9.6e-05	Kirkland et al., 2021	0.280818	1.4e-05	-1.29137	0.49848	3258.61	3422.14	Akia	Stream sediment	-52.0271	65.4303	Kirkland et al., 2021 NC
11	11 - 53	2954.1	23.2109	S	0.084306	0.280776	1.45e-05	0.001166	0.0380872	1.88688	8.8e-05	Kirkland et al., 2021	0.28071	1.4e-05	-6.04955	0.498434	3410.17	3673.5	Akia	Stream sediment	-52.0271	65.4303	Kirkland et al., 2021 NC
11	11 - 54	1849.81	34.0751	S	0.749022	0.281166	1.3e-05	0.0002643	0.00961196	1.88679	9.4e-05	Kirkland et al., 2021	0.281157	1.4e-05	-15.8949	0.497151	2821	3413.6	Akia	Stream sediment	-52.0271	65.4303	Kirkland et al., 2021 NC
11	11 - 63	2998.15	29.5474	S	1.36203	0.280836	1.5e-05	0.0005379	0.0183327	1.88691	8.4e-05	Kirkland et al., 2021	0.280805	1.6e-05	-1.62218	0.569698	3276.96	3445.67	Akia	Stream sediment	-52.0271	65.4303	Kirkland et al., 2021 NC
11	11 - 64	2987.99	25.8079	S	0.631646	0.280908	1.3e-05	0.001105	0.0378793	1.88684	9.3e-05	Kirkland et al., 2021	0.280845	1.4e-05	-0.453045	0.498474	3228.53	3368.46	Akia	Stream sediment	-52.0271	65.4303	Kirkland et al., 2021 NC
11	11 - 65	2961.53	46.1194	S	2.23	0.280854	1.9e-05	0.000681	0.0226361	1.88692	9.3e-05	Kirkland et al., 2021	0.280815	2e-05	-2.12152	0.712061	3265.1	3446.91	Akia	Stream sediment	-52.0271	65.4303	Kirkland et al., 2021 NC
11	11 - 72	1906.28	54.3841	S	5.16758	0.280926	1.6e-05	0.0004244	0.0143242	1.88684	0.00012	Kirkland et al., 2021	0.280911	1.6e-05	-23.3339	0.568247	3149.25	3896.46	Akia	Stream sediment	-52.0271	65.4303	Kirkland et al., 2021 NC
11	11 - 77	3019.67	26.5772	S	2.20003	0.280903	1.5e-05	0.000987	0.0314159	1.88681	9.1e-05	Kirkland et al., 2021	0.280846	1.6e-05	0.336403	0.569727	3225.42	3346.19	Akia	Stream sediment	-52.0271	65.4303	Kirkland et al., 2021 NC
11	11 - 81	3006.08	27.0439	S	0.149862	0.280873	1.6e-05	0.000513	0.0165936	1.88675	9.7e-05	Kirkland et al., 2021	0.280843	1.6e-05	-0.0692436	0.569709	3226.18	3359.71	Akia	Stream sediment	-52.0271	65.4303	Kirkland et al., 2021 NC
11	11 - 88	2973.35	29.8196	S	1.06084	0.280924	1.65e-05	0.001037	0.0360876	1.88673	7.4e-05	Kirkland et al., 2021	0.280865	1.6e-05	-0.0794359	0.569665	3201.51	3334.91	Akia	Stream sediment	-52.0271	65.4303	Kirkland et al., 2021 NC
11	11 - 94	2848.06	32.0298	S	1.02278	0.280908	1.55e-05	0.000646	0.0221344	1.88682	8.1e-05	Kirkland et al., 2021	0.280873	1.6e-05	-2.7515	0.569496	3190.82	3396.49	Akia	Stream sediment	-52.0271	65.4303	Kirkland et al., 2021 NC
11	11 - 95	3007.51	20.434	S	-2.30396	0.280872	1.25e-05	0.000406	0.0127592	1.88688	7.9e-05	Kirkland et al., 2021	0.280849	1.2e-05	0.148631	0.427283	3218.77	3347.89	Akia	Stream sediment	-52.0271	65.4303	Kirkland et al., 2021 NC
11	11 - 96	3030.31	21.0174	S	-7.6749	0.280821	1.4e-05	0.000766	0.0248836	1.8868	8.7e-05	Kirkland et al., 2021	0.280776	1.4e-05	-1.88136	0.498524	3315.88	3485.95	Akia	Stream sediment	-52.0271	65.4303	Kirkland et al., 2021 NC
11	11 - 97	2994.53	23.6543	S	0.672066	0.280862	1.25e-05	0.0003573	0.0121014	1.88674	7.3e-05	Kirkland et al., 2021	0.280841	1.2e-05	-0.410783	0.42727	3227.93	3371.02	Akia	Stream sediment	-52.0271	65.4303	Kirkland et al., 2021 NC
11	11 - 100	2990.17	25.7898	S	2.09604	0.280918	1.25e-05	0.0008635	0.0299153	1.88672	9e-05	Kirkland et al., 2021	0.280868	1.2e-05	0.446549	0.427265	3195.28	3316.73	Akia	Stream sediment	-52.0271	65.4303	Kirkland et al., 2021 NC
12	12 - 2	3543.15	20.2546	S	-3.23551	0.280447	1.3e-05	0.000538	0.0177639	1.88677	6.5e-05	Kirkland et al., 2021	0.28041	1.4e-05	-2.74421	0.499132	3786.77	3934.26	Akia	Stream sediment	-50.9984	65.685	Kirkland et al., 2021 NC
12	12 - 3	3564.05	22.2639	S	1.93972	0.28048	1.6e-05	0.001055	0.0374685	1.88681	9.2e-05	Kirkland et al., 2021	0.280407	1.6e-05	-2.34431	0.570465	3793.21	3927.03	Akia	Stream sediment	-50.9984	65.685	Kirkland et al., 2021 NC
12	12 - 5	2671.18	21.2404	S	-2.34667	0.280736	1.65e-05	0.000927	0.0281986	1.88679	8.9e-05	Kirkland et al., 2021	0.280689	1.6e-05	-13.4577	0.56926	3442.39	3893.24	Akia	Stream sediment	-50.9984	65.685	Kirkland et al., 2021 NC
12	12 - 7	3344.97	24.792	S	6.77741	0.280354	1.7e-05	0.000252	0.00760902	1.88681	8.1e-05	Kirkland et al., 2021	0.280338	1.8e-05	-10.0489	0.641437	3879.96	4208.82	Akia	Stream sediment	-50.9984	65.685	Kirkland et al., 2021 NC
12	12 - 8	2624.02	21.9317	S	-2.92895	0.280844	1.3e-05	0.000441	0.0146113	1.88698	8.3e-05	Kirkland et al., 2021	0.280822	1.4e-05	-9.82134	0.498047	3258.42	3642.82	Akia	Stream sediment	-50.9984	65.685	Kirkland et al., 2021 NC
12	12 - 9	2736.96	21.3444	S	-4.73777	0.280884	1.55e-05	0.0013336	0.0462118	1.88675	8.2e-05	Kirkland et al., 2021	0.280814	1.6e-05	-7.45014	0.569348	3279.92	3589.23	Akia	Stream sediment	-50.9984	65.685	Kirkland et al., 2021 NC
12	12 - 10	2769.6	20.357	S	-0.0160332	0.280769	1.05e-05	0.001714	0.0540855	1.88678	7e-05	Kirkland et al., 2021	0.280678	1e-05	-11.525	0.355869	3468.45	3854.64	Akia	Stream sediment	-50.9984	65.685	Kirkland et al., 2021 NC
12	12 - 12	3403.06	29.5603	S	7.73895	0.280337	1.2e-05	0.0003495	0.0120065	1.88681	0.00011	Kirkland et al., 2021	0.280314	1.2e-05	-9.51142	0.427684	3911.47	4222.05	Akia	Stream sediment	-50.9984	65.685	Kirkland et al., 2021 NC
12	12 - 13	3552.42	26.7979	S	4.76925	0.28041	1.1e-05	0.000205	0.00667978	1.88698	0.0001	Kirkland et al., 2021	0.280396	1.2e-05	-3.03115	0.427837	3803.06	3958.28	Akia	Stream sediment	-50.9984	65.685	Kirkland et al., 2021 NC
12	12 - 15	2720.36	22.2807	S	0.404558	0.280544	1.5e-05	0.00022	0.00628158	1.88684	6.4e-05	Kirkland et al., 2021	0.280533	1.6e-05	-17.858	0.569325	3630.93	4188.71	Akia	Stream sediment	-50.9984	65.685	Kirkland et al., 2021 NC
12	12 - 16	2761.93	20.8052	S	-1.39959	0.280687	1.55e-05	0.0007404	0.0248943	1.88681	8.1e-05	Kirkland et al., 2021	0.280648	1.6e-05	-12.7804	0.569381	3490.69	3922.62	Akia	Stream sediment	-50.9984	65.685	Kirkland et al., 2021 NC
12	12 - 19	1944.27	44.2738	S	9.00499	0.281192	1.4e-05	1.672e-05	0.000660651	1.88677	7.6e-05	Kirkland et al., 2021	0.281191	1.4e-05	-12.4865	0.49726	2769.37	3282.37	Akia	Stream sediment	-50.9984	65.685	Kirkland et al., 2021 NC
12	12 - 21	2728.24	21.3883	S	-6.05477	0.280857	1.65e-05	0.001383	0.0468473	1.88684	8.7e-05	Kirkland et al., 2021	0.280785	1.6e-05	-8.69917	0.569336	3320.46	3656.37	Akia	Stream sediment	-50.9984	65.685	Kirkland et al., 2021 NC
12	12 - 22	2720.36	37.0353	S	3.08131	0.280623	1.75e-05	0.000484	0.0172985	1.88685	8.2e-05	Kirkland et al., 2021	0.280598	1.8e-05	-15.5364	0.640491	3551.86	4052.75	Akia	Stream sediment	-50.9984	65.685	Kirkland et al., 2021 NC
12	12 - 25	2692.85	22.0037	S	0.569389	0.280714	1.8e-05	0.0005961	0.0200519	1.88687	8.7e-05	Kirkland et al., 2021	0.280683	1.8e-05	-13.1397	0.64045	3442.44	3891.05	Akia	Stream sediment	-50.9984	65.685	Kirkland et al., 2021 NC
12	12 - 26	3609.63	18.815	S	-0.837254	0.280527	1.45e-05	0.001577	0.0527453	1.88672	8.1e-05	Kirkland et al., 2021	0.280417	1.4e-05	-0.910457	0.499211	3781.56	3878.28	Akia	Stream sediment	-50.9984	65.685	Kirkland et al., 2021 NC
12	12 - 28	2728.24	26.0386	S	0.0415796	0.280926	1.6e-05	0.000721	0.0231787	1.88677	9e-05	Kirkland et al., 2021	0.280888	1.6e-05	-5.01295	0.569336	3173.06	3438.17	Akia	Stream sediment	-50.9984	65.685	Kirkland et al., 2021 NC
12	12 - 31	3007.51	25.6471	S	0.305237	0.28082	1.15e-05	0.0002153	0.00746987	1.88683	8.5e-05	Kirkland et al., 2021	0.280808	1.2e-05	-1.31075	0.427283	3271.28	3434.47	Akia	Stream sediment	-50.9984	65.685	Kirkland et al., 2021 NC
12	12 - 32	2616.38	20.7344	S	4.32354	0.280866	1.2e-05	0.001237	0.0422422	1.88674	7.5e-05	Kirkland et al., 2021	0.280804	1.2e-05	-10.6327	0.42689	3295.88	3684.92	Akia	Stream sediment	-50.9984	65.685	Kirkland et al., 2021 NC
12	12 - 34	3602.61	19.9819	S	-3.10738	0.280441	1.55e-05	0.00069	0.0237531	1.88684	8.6e-05	Kirkland et al., 2021	0.280393	1.6e-05	-1.93662	0.570517	3809.2	3933.04	Akia	Stream sediment	-50.9984	65.685	Kirkland et al., 2021 NC
12	12 - 35	2690.16	22.4535	S	0.754837	0.280742	1.25e-05	0.0003366	0.0107928	1.88666	7.9e-05	Kirkland et al., 2021	0.280725	1.2e-05	-11.7298	0.426964	3383.35	3806.01	Akia	Stream sediment	-50.9984	65.685	Kirkland et al., 2021 NC
12	12 - 36	2809.78	26.5742	S	0.69894	0.28107	1.15e-05	0.000725	0.0242472	1.88677	8.7e-05	Kirkland et al., 2021	0.281031	1.2e-05	1.97928	0.427084	2982.13	3085.23	Akia	Stream sediment	-50.9984	65.685	Kirkland et al., 2021 NC
12	12 - 38	2579.14	22.176	S	6.75091	0.280919	1.5e-05	0.001402	0.0447133	1.88686	9.6e-05	Kirkland et al., 2021	0.28085	1.6e-05	-9.87626	0.569137	3238.57	3611.72	Akia	Stream sediment	-50.9984	65.685	Kirkland et al., 2021 NC
12	12 - 40	2688.36	22.0283	S	-0.402484	0.28079	1.75e-05	0.001386	0.0399323	1.88689	7.3e-05	Kirkland et al., 2021	0.280719	1.8e-05	-11.9856	0.640443	3410.79	3819.7	Akia	Stream sediment	-50.9984	65.685	Kirkland et al., 2021 NC
12	12 - 41	2637.12	21.4097	S	2.32283	0.280946	9e-06	0.0003264	0.0109195	1.88679	0.0001	Kirkland et al., 2021	0.28093	1e-05	-5.68408	0.355759	3115.19	3407.83	Akia	Stream sediment	-50.9984	65.685	Kirkland et al., 2021 NC
12	12 - 42	2769.6	20.7695	S	-0.106893	0.280699	1.25e-05	0.000583	0.0172033	1.88671	0.00011	Kirkland et al., 2021	0.280668	1.2e-05	-11.8802	0.427043	3461.01	3875.54	Akia	Stream sediment	-50.9984	65.685	Kirkland et al., 2021 NC
12	12 - 44	2739.56	20.4892	S	5.64415	0.28082	1.9e-05	0.001254	0.0424909	1.88671	7.5e-05	Kirkland et al., 2021	0.280754	2e-05	-9.52019	0.711689	3358.99	3713.52	Akia	Stream sediment	-50.9984	65.685	Kirkland et al., 2021 NC
12	12 - 50	3565.98	21.7853	S	1.94019	0.280453	1.65e-05	0.0004079	0.0140204	1.88679	9.5e-05	Kirkland et al., 2021	0.280425	1.6e-05	-1.67398	0.570467	3766.57	3889.19	Akia	Stream sediment	-50.9984	65.685	Kirkland et al., 2021 NC
12	12 - 51	2684.76	21.1738	S	-3.08264	0.280485	9.5e-06	0.000704	0.0244457	1.88684	6.5e-05	Kirkland et al., 2021	0.280449	1e-05	-21.671	0.355799	3752.91	4384.42	Akia	Stream sediment	-50.9984	65.685	Kirkland et al., 2021 NC
12	12 - 58	3612.89	19.0297	S	-3.27446	0.280416	1.25e-05	8.366e-05	0.00350878	1.88681	7.7e-05	Kirkland et al., 2021	0.28041	1.2e-05	-1.0783	0.427898	3783.82	3890.67	Akia	Stream sediment	-50.9984	65.685	Kirkland et al., 2021 NC
12	12 - 60	2706.22	21.5004	S	-1.39513	0.280876	1.65e-05	0.001967	0.0652185	1.88685	6.8e-05	Kirkland et al., 2021	0.280774	1.6e-05	-9.59535	0.569306	3345.53	3692.42	Akia	Stream sediment	-50.9984	65.685	Kirkland et al., 2021 NC
12	12 - 61	3710.48	22.6703	S	1.84416	0.280538	1.8e-05	0.00235	0.09024	1.88693	0.00011	Kirkland et al., 2021	0.280369	1.8e-05	-0.193432	0.641998	3843.89	3914.67	Akia	Stream sediment	-50.9984	65.685	Kirkland et al., 2021 NC
12	12 - 62	3648.77	20.4384	S	9.96971	0.280436	1.6e-05	0.001003	0.0344225	1.88679	0.00011	Kirkland et al., 2021	0.280365	1.6e-05	-1.81973	0.57058	3846.24	3962.03	Akia	Stream sediment	-50.9984	65.685	Kirkland et al., 2021 NC
12	12 - 63	2724.74	29.4388	S	2.04592	0.280702	1.4e-05	0.00071	0.0257534	1.88679	9.8e-05	Kirkland et al., 2021	0.280665	1.4e-05	-13.0436	0.498165	3468.23	3909.72	Akia	Stream sediment	-50.9984	65.685	Kirkland et al., 2021 NC
12	12 - 64	2991.63	25.4276	S	2.26677	0.280838	1.4e-05	0.0003972	0.0129494	1.88678	9.7e-05	Kirkland et al., 2021	0.280815	1.4e-05	-1.41474	0.498478	3262.69	3428.32	Akia	Stream sediment	-50.9984	65.685	Kirkland et al., 2021 NC
12	12 - 65	3732.44	21.287	S	3.49519	0.280437	1.7e-05	0.000669	0.0221074	1.88679	6e-05	Kirkland et al., 2021	0.280389	1.8e-05	1.02132	0.642031	3812.41	3860.5	Akia	Stream sediment	-50.9984	65.685	Kirkland et al., 2021 NC
12	12 - 66	3676.63	22.2459	S	-0.537989	0.280458	1.35e-05	0.000826	0.02832	1.88689	7e-05	Kirkland et al., 2021	0.280399	1.4e-05	0.0608795	0.499291	3800.04	3873.39	Akia	Stream sediment	-50.9984	65.685	Kirkland et al., 2021 NC
12	12 - 67	3018.96	26.5835	S	-0.880249	0.280907	2.2e-05	0.000487	0.0171003	1.88678	9e-05	Kirkland et al., 2021	0.280879	2.2e-05	1.49482	0.783373	3179.28	3276.81	Akia	Stream sediment	-50.9984	65.685	Kirkland et al., 2021 NC
12	12 - 68	2812.26	35.2322	S	5.26076	0.281095	1.25e-05	0.0003654	0.0113075	1.88674	8.2e-05	Kirkland et al., 2021	0.281075	1.2e-05	3.61595	0.427086	2922	2989.37	Akia	Stream sediment	-50.9984	65.685	Kirkland et al., 2021 NC
12	12 - 72	3635.54	26.9251	S	4.39443	0.28037	1.65e-05	0.000723	0.0251767	1.88684	8.3e-05	Kirkland et al., 2021	0.280319	1.6e-05	-3.77929	0.570562	3905.32	4066.5	Akia	Stream sediment	-50.9984	65.685	Kirkland et al., 2021 NC
12	12 - 73	3649.22	20.4362	S	-1.95898	0.280461	1.75e-05	0.000603	0.0206941	1.88682	7.9e-05	Kirkland et al., 2021	0.280418	1.8e-05	0.0880712	0.641903	3774.7	3850.45	Akia	Stream sediment	-50.9984	65.685	Kirkland et al., 2021 NC
12	12 - 75	3798.36	24.0864	S	2.51198	0.280338	1.25e-05	0.0002829	0.00938254	1.88682	7.3e-05	Kirkland et al., 2021	0.280317	1.2e-05	0.0530855	0.428089	3903.65	3968.66	Akia	Stream sediment	-50.9984	65.685	Kirkland et al., 2021 NC
12	12 - 77	2682.96	21.6204	S	-2.24303	0.280739	1.25e-05	0.000846	0.0274873	1.88677	0.0001	Kirkland et al., 2021	0.280696	1.2e-05	-12.9346	0.426956	3431.31	3871.45	Akia	Stream sediment	-50.9984	65.685	Kirkland et al., 2021 NC
12	12 - 79	2624.58	20.9711	S	6.31062	0.28097	1.65e-05	0.000882	0.0280282	1.88676	6.4e-05	Kirkland et al., 2021	0.280926	1.6e-05	-6.11378	0.569197	3127.55	3423.69	Akia	Stream sediment	-50.9984	65.685	Kirkland et al., 2021 NC
12	12 - 80	2935.33	25.523	S	4.57607	0.280569	1.35e-05	0.000759	0.0262541	1.88686	0.00013	Kirkland et al., 2021	0.280526	1.4e-05	-13.0299	0.498412	3647.78	4069.59	Akia	Stream sediment	-50.9984	65.685	Kirkland et al., 2021 NC
12	12 - 81	3509.93	25.7508	S	5.87955	0.280397	1.6e-05	0.000598	0.0207081	1.88677	9e-05	Kirkland et al., 2021	0.280357	1.6e-05	-5.4521	0.570391	3857.78	4067.18	Akia	Stream sediment	-50.9984	65.685	Kirkland et al., 2021 NC
12	12 - 82	3473.32	23.3335	S	-2.20175	0.280419	1.45e-05	0.0004023	0.0115257	1.88686	9.8e-05	Kirkland et al., 2021	0.280392	1.4e-05	-5.05822	0.499048	3810.23	4015.84	Akia	Stream sediment	-50.9984	65.685	Kirkland et al., 2021 NC
12	12 - 84	3547.06	19.5242	S	-0.474819	0.28044	1.5e-05	0.0008692	0.0323801	1.88686	7.3e-05	Kirkland et al., 2021	0.28038	1.6e-05	-3.71023	0.570441	3827.88	3993.92	Akia	Stream sediment	-50.9984	65.685	Kirkland et al., 2021 NC
12	12 - 86	3578.94	22.6356	S	3.4295	0.280379	1.05e-05	0.000377	0.0125068	1.88682	6.1e-05	Kirkland et al., 2021	0.280353	1e-05	-3.93047	0.356553	3859.72	4031.51	Akia	Stream sediment	-50.9984	65.685	Kirkland et al., 2021 NC
12	12 - 87	3624.03	19.886	S	0.872962	0.280443	1.5e-05	0.001125	0.0371058	1.88676	9.5e-05	Kirkland et al., 2021	0.280364	1.6e-05	-2.44907	0.570546	3848.99	3979.71	Akia	Stream sediment	-50.9984	65.685	Kirkland et al., 2021 NC
12	12 - 88	2983.62	25.4921	S	0.74508	0.280847	1.7e-05	0.000935	0.0308075	1.88678	9e-05	Kirkland et al., 2021	0.280793	1.8e-05	-2.37813	0.640888	3295.66	3479.21	Akia	Stream sediment	-50.9984	65.685	Kirkland et al., 2021 NC
12	12 - 89	2942.86	31.9586	S	0.730858	0.280831	1.25e-05	0.000451	0.014909	1.88684	8.1e-05	Kirkland et al., 2021	0.280806	1.2e-05	-2.90941	0.427218	3276.33	3479.15	Akia	Stream sediment	-50.9984	65.685	Kirkland et al., 2021 NC
12	12 - 90	2961.53	25.3136	S	1.78598	0.280811	1.35e-05	0.0006101	0.0224931	1.88679	8.5e-05	Kirkland et al., 2021	0.280776	1.4e-05	-3.50895	0.498443	3315.94	3529.08	Akia	Stream sediment	-50.9984	65.685	Kirkland et al., 2021 NC
12	12 - 91	2882.99	23.68	S	-0.00520615	0.281076	2.1e-05	0.001287	0.0417485	1.88686	8.1e-05	Kirkland et al., 2021	0.281005	2.2e-05	2.77361	0.783122	3017.47	3094.8	Akia	Stream sediment	-50.9984	65.685	Kirkland et al., 2021 NC
12	12 - 92	2917.84	23.0774	S	-0.106463	0.280812	1.8e-05	0.000779	0.0265773	1.88675	8.9e-05	Kirkland et al., 2021	0.280768	1.8e-05	-4.82173	0.640789	3328.9	3573.01	Akia	Stream sediment	-50.9984	65.685	Kirkland et al., 2021 NC
12	12 - 93	2999.59	21.1713	S	-4.39318	0.280815	1.55e-05	0.0003882	0.0130928	1.88676	0.00011	Kirkland et al., 2021	0.280793	1.6e-05	-2.0293	0.5697	3292.11	3470.92	Akia	Stream sediment	-50.9984	65.685	Kirkland et al., 2021 NC
12	12 - 97	2811.43	30.9153	S	1.66634	0.280616	1.75e-05	0.000642	0.0210014	1.88685	0.00014	Kirkland et al., 2021	0.280581	1.8e-05	-13.9816	0.640628	3575.28	4030.89	Akia	Stream sediment	-50.9984	65.685	Kirkland et al., 2021 NC
12	12 - 98	2631.52	20.9839	S	2.42727	0.280656	8.5e-06	0.000313	0.00971585	1.88679	7.4e-05	Kirkland et al., 2021	0.28064	8e-06	-16.1069	0.284603	3493.58	4018.72	Akia	Stream sediment	-50.9984	65.685	Kirkland et al., 2021 NC
12	12 - 100	2625.9	22.3767	S	-0.0459448	0.28095	1.85e-05	0.0003204	0.0107219	1.88674	0.00012	Kirkland et al., 2021	0.280934	1.8e-05	-5.7914	0.640349	3109.47	3405.56	Akia	Stream sediment	-50.9984	65.685	Kirkland et al., 2021 NC
13	13 - 5	3004.64	28.4408	S	1.58868	0.280854	1.5e-05	0.0005875	0.0200739	1.88682	0.00012	Kirkland et al., 2021	0.28082	1.6e-05	-0.932296	0.569707	3257.35	3409.81	Akia	Stream sediment	-51.3828	65.4347	Kirkland et al., 2021 NC
13	13 - 6	2489.09	37.0493	S	1.17511	0.280924	1.45e-05	0.000482	0.016027	1.88686	9.4e-05	Kirkland et al., 2021	0.280901	1.4e-05	-10.1585	0.49789	3156.48	3559.54	Akia	Stream sediment	-51.3828	65.4347	Kirkland et al., 2021 NC
13	13 - 7	3768.3	21.6976	S	2.73884	0.280354	1.05e-05	0.000583	0.0201138	1.8868	7.2e-05	Kirkland et al., 2021	0.280312	1e-05	-0.87237	0.356715	3912.37	3999.45	Akia	Stream sediment	-51.3828	65.4347	Kirkland et al., 2021 NC
13	13 - 8	3008.23	28.0597	S	0.706213	0.280816	1.25e-05	0.000369	0.0122501	1.88679	8e-05	Kirkland et al., 2021	0.280795	1.2e-05	-1.75249	0.427284	3289.21	3461.21	Akia	Stream sediment	-51.3828	65.4347	Kirkland et al., 2021 NC
13	13 - 9	3049.96	24.6315	S	-1.4434	0.280821	1.3e-05	0.0005092	0.0148524	1.88694	7.9e-05	Kirkland et al., 2021	0.280791	1.4e-05	-0.891643	0.498547	3294.31	3442.54	Akia	Stream sediment	-51.3828	65.4347	Kirkland et al., 2021 NC
13	13 - 12	3023.94	22.4257	S	0.365166	0.280805	1.6e-05	0.000354	0.0110995	1.88688	0.0001	Kirkland et al., 2021	0.280784	1.6e-05	-1.74621	0.569733	3302.37	3473	Akia	Stream sediment	-51.3828	65.4347	Kirkland et al., 2021 NC
13	13 - 13	3026.06	26.862	S	0.542017	0.280823	1.45e-05	0.000545	0.0168528	1.88683	8.9e-05	Kirkland et al., 2021	0.280791	1.4e-05	-1.45081	0.498519	3294.67	3457.15	Akia	Stream sediment	-51.3828	65.4347	Kirkland et al., 2021 NC
13	13 - 14	2579.14	26.3955	S	0.579977	0.281026	1.1e-05	0.00036	0.0121699	1.88677	7.6e-05	Kirkland et al., 2021	0.281008	1.2e-05	-4.24171	0.426853	3012.57	3277.44	Akia	Stream sediment	-51.3828	65.4347	Kirkland et al., 2021 NC
13	13 - 15	2790.67	21.8901	S	0.168706	0.280942	1.2e-05	0.0003498	0.0120741	1.88682	9.2e-05	Kirkland et al., 2021	0.280923	1.2e-05	-2.30195	0.427065	3122.29	3325.41	Akia	Stream sediment	-51.3828	65.4347	Kirkland et al., 2021 NC
13	13 - 16	2792.34	33.9341	S	1.55094	0.280626	1.55e-05	0.000701	0.0239679	1.88668	0.00011	Kirkland et al., 2021	0.280588	1.6e-05	-14.178	0.569422	3567.49	4027.86	Akia	Stream sediment	-51.3828	65.4347	Kirkland et al., 2021 NC
13	13 - 19	2917.07	25.6708	S	3.43581	0.280847	1.25e-05	0.000765	0.0240516	1.88683	0.00011	Kirkland et al., 2021	0.280804	1.2e-05	-3.56548	0.427192	3281.37	3498.08	Akia	Stream sediment	-51.3828	65.4347	Kirkland et al., 2021 NC
13	13 - 26	3039.47	21.9936	S	0.515715	0.280816	1.75e-05	0.0004589	0.0135416	1.88689	0.00011	Kirkland et al., 2021	0.280789	1.8e-05	-1.20941	0.640973	3296.69	3453.24	Akia	Stream sediment	-51.3828	65.4347	Kirkland et al., 2021 NC
13	13 - 29	2979.23	29.052	S	0.817622	0.280838	1.6e-05	0.0002437	0.00695159	1.88689	7.5e-05	Kirkland et al., 2021	0.280824	1.6e-05	-1.39147	0.569672	3250.08	3417.34	Akia	Stream sediment	-51.3828	65.4347	Kirkland et al., 2021 NC
13	13 - 31	3002.48	24.9931	S	-1.27324	0.28083	1.2e-05	0.001291	0.0447073	1.88687	9.6e-05	Kirkland et al., 2021	0.280756	1.2e-05	-3.28126	0.427278	3348.79	3547.26	Akia	Stream sediment	-51.3828	65.4347	Kirkland et al., 2021 NC
13	13 - 32	2993.8	28.551	S	1.11004	0.280826	1.65e-05	0.0004195	0.0134399	1.88673	9.1e-05	Kirkland et al., 2021	0.280802	1.6e-05	-1.83684	0.569692	3280.28	3455.03	Akia	Stream sediment	-51.3828	65.4347	Kirkland et al., 2021 NC
13	13 - 33	3479.49	22.0503	S	-2.92635	0.280391	1.6e-05	0.000859	0.0300136	1.88675	9.8e-05	Kirkland et al., 2021	0.280333	1.6e-05	-7.00366	0.570349	3891.26	4134.42	Akia	Stream sediment	-51.3828	65.4347	Kirkland et al., 2021 NC
13	13 - 34	3050.66	21.5929	S	-6.1144	0.280844	1.45e-05	0.000747	0.0224756	1.88675	0.00012	Kirkland et al., 2021	0.2808	1.4e-05	-0.552687	0.498548	3283.83	3422.99	Akia	Stream sediment	-51.3828	65.4347	Kirkland et al., 2021 NC
13	13 - 36	2990.9	25.0829	S	0.578742	0.280841	1.45e-05	0.0004509	0.0150824	1.88675	7.5e-05	Kirkland et al., 2021	0.280815	1.4e-05	-1.43468	0.498477	3263.18	3428.94	Akia	Stream sediment	-51.3828	65.4347	Kirkland et al., 2021 NC
13	13 - 37	2995.25	23.299	S	-1.35634	0.28085	1.2e-05	0.000698	0.0241887	1.88686	7.9e-05	Kirkland et al., 2021	0.28081	1.2e-05	-1.51883	0.427271	3271.8	3437.31	Akia	Stream sediment	-51.3828	65.4347	Kirkland et al., 2021 NC
13	13 - 38	2970.41	29.1451	S	-0.120846	0.280859	1.45e-05	0.0004906	0.0157819	1.88683	0.00011	Kirkland et al., 2021	0.280831	1.4e-05	-1.35174	0.498453	3242.78	3408.14	Akia	Stream sediment	-51.3828	65.4347	Kirkland et al., 2021 NC
13	13 - 43	3061.76	22.2034	S	-1.24789	0.28086	1.85e-05	0.0005039	0.0151259	1.88686	7.5e-05	Kirkland et al., 2021	0.28083	1.8e-05	0.783077	0.641007	3242.55	3352.37	Akia	Stream sediment	-51.3828	65.4347	Kirkland et al., 2021 NC
13	13 - 46	2566.48	24.6138	S	-5.1376	0.280772	1.5e-05	0.000573	0.0197628	1.88677	6.6e-05	Kirkland et al., 2021	0.280744	1.6e-05	-13.9416	0.56912	3364.16	3841.98	Akia	Stream sediment	-51.3828	65.4347	Kirkland et al., 2021 NC
13	13 - 49	2706.49	20.5943	S	-9.02643	0.280778	1.15e-05	0.000746	0.0267446	1.8868	9.2e-05	Kirkland et al., 2021	0.280739	1.2e-05	-10.8248	0.42698	3371.05	3765.15	Akia	Stream sediment	-51.3828	65.4347	Kirkland et al., 2021 NC
13	13 - 50	2542.8	24.7851	S	-16.4457	0.280867	1.55e-05	0.001657	0.0641217	1.88686	7.2e-05	Kirkland et al., 2021	0.280786	1.6e-05	-12.981	0.569088	3330.66	3767.34	Akia	Stream sediment	-51.3828	65.4347	Kirkland et al., 2021 NC
Analysis interpretation: D = discordant, I = magmatic, S = detrital, M = metamorphic, P = Pb loss, X = inherited, Y = youngest detrital component; numeric addition to alpha character indicates additional generation.
λ176Lu=1.867×10−11a (Söderlund et al. 2004)
CHUR values: 176Lu/177Hf=0.0336, 176Hf/177Hf=0.282785 (Bouvier et al. 2008)
Depleted mantle values: 176Lu/177Hf=0.0388, 176Hf/177Hf=0.28325 (from Griffin et al. [2004] modified to the aformentioned decay constant and CHUR values) 176Lu/177Hf value used in two step depleted model age = 0.015
Söderlund, U., Patchett, P.J., Vervoort, J.D., Isachsen, C.E., 2004. The 176Lu decay constant determined by Lu-Hf and U-Pb isotope systematics of Precambrian mafic intrusions. Earth Planet. Sci. Lett. 219, 311–324. https://dx.doi.org/10.1016/S0012-821X(04)00012-3
Bouvier, A., Vervoort, J.D., Patchett, P.J., 2008. The Lu-Hf and Sm-Nd isotopic composition of CHUR: Constraints from unequilibrated chondrites and implications for the bulk composition of terrestrial planets. Earth Planet. Sci. Lett. 273, 48–57. https://dx.doi.org/10.1016/j.epsl.2008.06.010
Griffin, W.L., Belousova, E.A., Shee, S.R., Pearson, N.J., O’Reilly, S.Y., 2004. Archean crustal evolution in the northern Yilgam Craton: U-Pb and Hf-isotope evidence from detrital zircons. Precambrian Res. 131, 231–282.
Hf data sources (this work and:)
Gardiner, N.J., Kirkland, C.L., Hollis, J. et al. Building Mesoarchaean crust upon Eoarchaean roots: the Akia Terrane, West Greenland. Contrib Mineral Petrol 174, 20 (2019). https://doi.org/10.1007/s00410-019-1554-x
Gardiner, N. J., Kirkland, C. L., Hollis, J. A., Cawood, P. A., Nebel, O., Szilas, K. & Yakymchuk, C., 2020, North Atlantic Craton architecture revealed by kimberlite-hosted crustal zircons, Earth and Planetary Science Letters. 534, 116091.
Kirkland, C.L., Hartnady, M.I.H., Barham, M. et al. Widespread reworking of Hadean-to-Eoarchean continents during Earth’s thermal peak. Nat Commun 12, 331 (2021). https://doi.org/10.1038/s41467-020-20514-4
U-Pb age sources
Gardiner et al., 2019 CMP	Gardiner, N. J. et al. Building Mesoarchaean crust upon Eoarchaean roots: the Akia Terrane, West Greenland. Contributions to Mineralogy and Petrology 174, 20 (2019).
Gardiner et al., 2020 EPSL	Gardiner, N. J. et al. North Atlantic Craton architecture revealed by kimberlite-hosted crustal zircons. Earth and Planetary Science Letters 534, 116091, doi:https://doi.org/10.1016/j.epsl.2020.116091 (2020).
Kirkland et al., 2018 Lithos	Kirkland, C. L. et al. Apatite: a U-Pb thermochronometer or geochronometer? Lithos 318-319, 143-157, doi:https://doi.org/10.1016/j.lithos.2018.08.007 (2018).
Kirkland et al., 2018 PR	Kirkland, C. L., Yakymchuk, C., Hollis, J., Heide-Jørgensen, H. & Danišík, M. Mesoarchean exhumation of the Akia terrane and a common Neoarchean tectonothermal history for West Greenland. Precambrian Research 314, 129-144, doi:https://doi.org/10.1016/j.precamres.2018.06.004 (2018).
Kirkland et al., 2020 CG	Kirkland, C. L. et al. Titanite petrochronology linked to phase equilibrium modelling constrains tectono-thermal events in the Akia Terrane, West Greenland. Chemical Geology 536, 119467, doi:https://doi.org/10.1016/j.chemgeo.2020.119467 (2020).
Kirkland et al., 2020 EPSL	Kirkland, C. L. et al. Theoretical versus empirical secular change in Archean zircon composition. Earth and Planetary Science Letters (Accepted).
Olierook et al., 2020 JPet	Olierook, H. K. H. et al. Differentiating between inherited and autocrystic zircon in granitoids. Journal of Petrology, doi:10.1093/petrology/egaa081 (2020).
Steenfelt et al., 2020 PR	Steenfelt, A. et al. The Mesoarchaean Akia terrane, West Greenland, revisited: New insights based on spatial integration of geophysics, field observation, geochemistry and geochronology. Precambrian Research, 105958, doi:https://doi.org/10.1016/j.precamres.2020.105958 (2020).
Waterton et al., 2020 FiES	Waterton, P. et al. Geodynamic Implications of Synchronous Norite and TTG Formation in the 3 Ga Maniitsoq Norite Belt, West Greenland. Frontiers in Earth Science 8, doi:10.3389/feart.2020.562062 (2020).
Yakymchuk et al., 2020 PR	Yakymchuk, C. et al. Mesoarchean partial melting of mafic crust and tonalite production during high-T–low-P stagnant tectonism, Akia Terrane, West Greenland. Precambrian Research, 105615, doi:https://doi.org/10.1016/j.precamres.2020.105615 (2020).
Yakymchuk et al., 2021 EPSL	Yakymchuk, C., Kirkland, C. L., Cavosie, A. J., Szilas, K., Hollis, J., Gardiner, N. J., Waterton, P., Steenfelt, A., & Martin, L. (2021). Stirred not shaken; critical evaluation of a proposed Archean meteorite impact in West Greenland. Earth and Planetary Science Letters, 557, [116730]. https://doi.org/10.1016/j.epsl.2020.116730
Olierook et al., 2021 SD	Olierook, H.K.H., Kirkland, C.L., Hollis, J.A. et al. Regional zircon U-Pb geochronology for the Maniitsoq region, southwest Greenland. Sci Data 8, 139 (2021). https://doi.org/10.1038/s41597-021-00922-x
Kirkland et al., 2021 NC	Kirkland, C.L., Hartnady, M.I.H., Barham, M. et al. Widespread reworking of Hadean-to-Eoarchean continents during Earth’s thermal peak. Nat Commun 12, 331 (2021). https://doi.org/10.1038/s41467-020-20514-4

## Sheet: Supplementary table 2
Supplemental Table S2: Zircon Hf isotope time series (North Atlantic Craton), quantiles, and spectral analysis.
Timeseries			Quartiles on 25 moving bin							REDFIT spectral analysis (rectangle window, 2 segments)
Age (Ma)	εHfi		Age	0	0.25	0.5	0.75	1		Frequency (in Ma)	Freq	Power	Theor.AR(1)	chi2 80%	chi2 90%	chi2 95%	chi2 99%	chi2 crit.
2315.98	-18.847		2400	-17.2397	-17.2397	-17.2397	-17.2397	-17.2397			0	4.8577e-29	93.234	143.26	191.28	237.74	342.21	274.41
2377.5	-17.2397		2425	-21.9087	-21.1302	-20.3517	-19.5732	-18.7947		6125.05	0.0040816	0.060692	92.174	141.63	189.1	235.03	338.32	271.29
2411.67	-18.7947		2475	-21.4057	-20.9123	-18.7568	-16.0553	-13.9245		3062.49	0.0081633	1.0747	89.132	136.96	182.86	227.28	327.16	262.34
2418.19	-21.9087		2500	-20.6419	-19.9102	-17.3939	-14.3522	-10.1585		2041.65	0.012245	6.2105	84.488	129.83	173.34	215.44	310.11	248.67
2461.99	-13.9245		2525	-18.2837	-18.2837	-18.2837	-18.2837	-18.2837		1531.21	0.016327	20.994	78.748	121	161.56	200.8	289.04	231.78
2463.04	-20.7479		2550	-12.981	-12.6224	-12.0222	-11.4266	-6.5778		1225.01	0.020408	44.248	72.427	111.29	148.59	184.68	265.84	213.17
2465.14	-16.7656		2575	-18.3109	-12.9378	-12.0188	-10.4737	-8.21341		1020.82	0.02449	62.378	65.963	101.36	135.33	168.2	242.11	194.15
2470.38	-21.4057		2600	-12.7353	-11.8355	-11.0546	-10.0721	-4.24171		875.013	0.028571	72.79	59.676	91.699	122.43	152.17	219.04	175.64
2483.91	-20.6419		2625	-10.6327	-10.3613	-9.82134	-6.11378	-5.5574		765.626	0.032653	81.576	53.772	82.627	110.32	137.11	197.37	158.27
2484.95	-15.7065		2650	-16.1069	-11.3172	-8.18362	-5.71091	-4.96136		680.55	0.036735	86.576	48.36	74.31	99.214	123.31	177.5	142.34
2489.09	-10.1585		2675	-16.1522	-14.1314	-12.6697	-10.6036	-6.76931		612.505	0.040816	82.585	43.478	66.809	89.199	110.86	159.58	127.97
2489.09	-13.9008		2700	-21.671	-13.2372	-11.9856	-9.49304	-6.25674		556.818	0.044898	72.483	39.123	60.117	80.264	99.759	143.6	115.15
2496.3	-20.1866		2725	-19.856	-9.70805	-7.64196	-5.33448	-2.72916		510.412	0.04898	63.964	35.264	54.186	72.347	89.918	129.43	103.79
2498.35	-19.0813		2750	-14.6122	-8.69917	-6.41886	-3.90774	-2.05619		471.156	0.053061	60.718	31.857	48.952	65.357	81.232	116.93	93.764
2522.76	-18.2837		2775	-12.7804	-9.64541	-5.94666	-3.75958	-2.13533		437.499	0.057143	58.701	28.855	44.339	59.199	73.577	105.91	84.928
2525.49	-12.9426		2800	-15.177	-9.30407	-6.17014	-4.28575	-0.569216		408.337	0.061224	52.395	26.211	40.275	53.773	66.834	96.205	77.145
2528.8	-12.0222		2825	-13.9816	-6.80884	-5.39666	-3.50927	3.61595		382.813	0.065306	40.95	23.879	36.693	48.99	60.889	87.647	70.282
2531.31	-12.3021		2850	-7.85765	-5.86008	-4.42526	-3.90765	-2.7515		360.293	0.069388	27.24	21.82	33.529	44.766	55.639	80.09	64.223
2536.92	-11.9192		2875	-6.83511	-6.38408	-4.82948	-4.22865	2.49481		340.28	0.073469	14.24	19.998	30.729	41.028	50.993	73.403	58.86
2542.8	-12.981		2900	-6.30841	-5.01625	-4.36658	-2.54164	2.77361		322.369	0.077551	5.0176	18.382	28.246	37.713	46.873	67.471	54.104
2546.77	-6.5778		2925	-14.6708	-4.82173	-3.88665	-3.16832	1.27689		306.249	0.081633	2.5487	16.945	26.038	34.765	43.208	62.197	49.874
2549.74	-10.9339		2950	-13.0299	-4.90013	-3.22033	-2.27878	-0.761625		291.668	0.085714	6.5503	15.664	24.069	32.135	39.94	57.492	46.102
2550.24	-13.5535		2975	-9.20737	-3.50895	-2.13022	-1.19212	3.47221		278.409	0.089796	13.659	14.517	22.308	29.784	37.018	53.286	42.729
2551.72	-10.5242		3000	-11.6	-2.60691	-1.78096	-0.720218	3.77124		266.303	0.093878	20.44	13.49	20.728	27.675	34.397	49.513	39.704
2552.71	-12.406		3025	-6.22666	-2.02978	-1.28565	-0.380944	2.58475		255.209	0.097959	24.475	12.565	19.308	25.779	32.04	46.121	36.983
2552.71	-13.2816		3050	-5.27823	-1.93113	-0.93242	-0.276597	2.13594		245.002	0.10204	24.519	11.732	18.027	24.069	29.915	43.061	34.53
2553.6	-11.1807		3075	-4.40794	-2.04059	-1.15706	-0.385216	1.30791		235.582	0.10612	21.489	10.978	16.869	22.523	27.993	40.295	32.312
2555.67	-10.3702		3100	-2.46157	-1.26508	0.695279	1.12862	1.99513		226.86	0.1102	18.558	10.295	15.819	21.121	26.251	37.787	30.301
2557.64	-12.9604		3125	-1.40813	-0.741599	-0.0750665	0.60373	1.28253		218.742	0.11429	18.345	9.674	14.865	19.847	24.667	35.508	28.473
2558.82	-12.2695		3150	-10.2289	-2.98402	-0.524342	0.346262	2.82394		211.202	0.11837	20.393	9.1082	13.996	18.686	23.225	33.431	26.808
2559.61	-10.3527		3175	-1.50175	-0.998743	-0.804296	-0.445586	0.550213		204.165	0.12245	22.283	8.5917	13.202	17.627	21.908	31.535	25.288
2562.56	-18.3109		3200	-4.38299	-0.773993	0.451625	1.82457	4.69617		197.582	0.12653	22.111	8.1188	12.475	16.657	20.702	29.8	23.896
2564.13	-12.0284		3225	-5.17555	-1.96418	-0.13759	0.7538	2.10977		191.41	0.13061	19.331	7.6852	11.809	15.767	19.596	28.208	22.62
2565.5	-12.3399		3250	-8.54525	-2.99097	-0.888819	0.224842	1.69597		185.611	0.13469	14.362	7.2866	11.197	14.949	18.58	26.745	21.446
2566.48	-12.0188		3275	-6.17679	-5.45431	-3.48007	-1.68795	2.16398		180.141	0.13878	8.5216	6.9195	10.632	14.196	17.644	25.398	20.366
2566.48	-13.9416		3350	-10.0489	-10.0489	-10.0489	-10.0489	-10.0489		174.997	0.14286	3.6659	6.5807	10.112	13.501	16.78	24.154	19.369
2567.36	-8.21341		3425	-9.51142	-8.62795	-7.74448	-6.86101	-5.97753		170.137	0.14694	1.1203	6.2676	9.6308	12.858	15.982	23.005	18.447
2567.45	-9.42409		3450	-8.02854	-7.35048	-6.67242	-5.99436	-5.31629		165.541	0.15102	1.0138	5.9776	9.1852	12.264	15.242	21.94	17.594
2569.41	-10.4737		3475	-5.05822	-5.05822	-5.05822	-5.05822	-5.05822		161.186	0.1551	2.4325	5.7086	8.7718	11.712	14.556	20.953	16.802
2570.39	-11.5531		3500	-7.00366	-5.89275	-4.78185	-3.67094	-2.56003		157.055	0.15918	4.1905	5.4586	8.3877	11.199	13.919	20.036	16.066
2570.39	-11.3347		3525	-5.4521	-4.97553	-4.49897	-4.02241	-3.54584		153.121	0.16327	5.6179	5.226	8.0303	10.722	13.326	19.182	15.382
2572.34	-12.9378		3550	-3.71023	-3.46872	-3.22722	-2.98572	-2.74421		149.388	0.16735	6.6753	5.0092	7.6972	10.277	12.773	18.386	14.744
2574.28	-10.293		3575	-5.40594	-3.03115	-2.34431	-1.91074	-1.67398		145.832	0.17143	7.5078	4.8069	7.3863	9.8618	12.257	17.644	14.148
2576.23	-12.3839		3600	-3.93047	-3.37273	-2.92268	-2.44878	-1.8195		142.442	0.17551	8.0625	4.6178	7.0958	9.4739	11.775	16.949	13.591
2579.14	-9.87626		3625	-5.48868	-2.94476	-2.19284	-1.29288	-0.910457		139.206	0.17959	8.0882	4.4409	6.8239	9.1108	11.324	16.3	13.071
2579.14	-4.24171		3650	-3.77929	-1.81973	-1.47583	-0.917323	0.0880712		136.114	0.18367	7.3557	4.2751	6.5691	8.7707	10.901	15.691	12.583
2579.92	-12.7353		3675	-2.78038	-2.78038	-2.78038	-2.78038	-2.78038		133.149	0.18776	5.9069	4.1195	6.3301	8.4515	10.504	15.12	12.125
2581.08	-11.8528		3700	-1.85985	-1.56525	-0.932003	-0.282496	0.0608795		130.317	0.19184	4.2177	3.9734	6.1056	8.1518	10.132	14.584	11.695
2581.08	-10.7893		3725	-0.193432	-0.0811022	0.0312274	0.143557	0.255886		127.603	0.19592	3.0638	3.836	5.8945	7.87	9.7815	14.08	11.291
2583.98	-10.6596		3750	1.02132	1.17513	1.32894	1.48275	1.63657		125	0.2	3.0596	3.7067	5.6958	7.6047	9.4518	13.605	10.91
2584.66	-11.7839		3775	-1.55729	-1.38606	-1.21483	-1.0436	-0.87237		122.501	0.20408	4.3073	3.5849	5.5086	7.3548	9.1411	13.158	10.551
2587.84	-11.32		3800	0.0530855	0.0530855	0.0530855	0.0530855	0.0530855		120.1	0.20816	6.3436	3.47	5.332	7.119	8.8481	12.736	10.213
2595.54	-6.1105		3825	-0.761981	-0.761371	-0.760761	-0.227027	0.306707		117.791	0.21224	8.243	3.3615	5.1653	6.8964	8.5715	12.338	9.8939
2602.04	-10.3613									115.564	0.21633	9.0339	3.259	5.0078	6.6861	8.3101	11.962	9.5921
2616.38	-10.6327									113.425	0.22041	8.3044	3.1621	4.8588	6.4872	8.0629	11.606	9.3068
2621.2	-5.5574									111.364	0.22449	6.4272	3.0703	4.7178	6.299	7.8289	11.269	9.0367
2624.02	-9.82134									109.376	0.22857	4.1853	2.9834	4.5843	6.1207	7.6072	10.95	8.7809
2624.58	-6.11378									107.458	0.23265	2.29	2.901	4.4576	5.9516	7.3971	10.648	8.5383
2625.9	-5.7914									105.606	0.23673	1.2042	2.8228	4.3375	5.7912	7.1978	10.361	8.3082
2627.78	-10.5758									103.812	0.24082	1.0298	2.7486	4.2235	5.6389	7.0085	10.088	8.0898
2631.52	-16.1069									102.082	0.2449	1.4893	2.6781	4.1151	5.4943	6.8287	9.8297	7.8823
2637.12	-4.96136									100.41	0.24898	2.2556	2.611	4.0121	5.3568	6.6578	9.5837	7.685
2637.12	-5.68408									98.7908	0.25306	3.2193	2.5473	3.9142	5.226	6.4953	9.3497	7.4974
2645.48	-11.5644									97.2233	0.25714	4.3216	2.4866	3.8209	5.1015	6.3406	9.127	7.3188
2652.87	-6.76931									95.7048	0.26122	5.343	2.4288	3.7322	4.983	6.1933	8.9149	7.1487
2659.31	-16.1522									94.2294	0.26531	5.9957	2.3738	3.6476	4.8701	6.0529	8.7129	6.9867
2659.31	-11.8816									92.8023	0.26939	6.0526	2.3213	3.567	4.7624	5.9191	8.5203	6.8323
2671.18	-13.4577									91.4177	0.27347	5.3642	2.2713	3.4901	4.6598	5.7915	8.3367	6.685
2676.63	-10.4899									90.0739	0.27755	4.0223	2.2236	3.4167	4.5618	5.6698	8.1615	6.5445
2676.63	-6.25674									88.769	0.28163	2.5779	2.178	3.3467	4.4684	5.5536	7.9942	6.4105
2681.15	-8.62753									87.5013	0.28571	1.7932	2.1345	3.2799	4.3791	5.4427	7.8346	6.2824
2682.96	-12.9346									86.2664	0.2898	2.0734	2.0929	3.216	4.2939	5.3368	7.6821	6.1601
2684.76	-21.671									85.0687	0.29388	3.2266	2.0533	3.155	4.2124	5.2356	7.5364	6.0433
2687.46	-12.2673									83.9039	0.29796	4.6112	2.0153	3.0967	4.1346	5.1388	7.3971	5.9316
2688.36	-18.6266									82.7705	0.30204	5.4194	1.979	3.041	4.0602	5.0463	7.264	5.8249
2688.36	-6.54785									81.6673	0.30612	5.0686	1.9444	2.9877	3.989	4.9579	7.1367	5.7228
2688.36	-11.9856									80.5932	0.3102	3.6482	1.9112	2.9368	3.921	4.8733	7.015	5.6252
2690.16	-13.4847									79.5444	0.31429	1.997	1.8795	2.888	3.8559	4.7924	6.8985	5.5318
2690.16	-11.7298									78.525	0.31837	1.1353	1.8491	2.8414	3.7936	4.715	6.7871	5.4425
2692.85	-8.00808									77.5314	0.32245	1.5565	1.8201	2.7967	3.7341	4.641	6.6805	5.357
2692.85	-10.0693									76.5626	0.32653	2.953	1.7923	2.754	3.677	4.5701	6.5785	5.2752
2692.85	-13.1397									75.6178	0.33061	4.5082	1.7657	2.7132	3.6225	4.5023	6.4809	5.1969
2693.74	-9.49304									74.696	0.33469	5.4181	1.7403	2.6741	3.5703	4.4375	6.3875	5.1221
2698.21	-13.2372									73.7942	0.33878	5.2464	1.7159	2.6367	3.5203	4.3754	6.2982	5.0504
2700	-14.1588									72.9161	0.34286	4.0935	1.6926	2.6009	3.4725	4.316	6.2126	4.9818
2701.78	-4.93446									72.0586	0.34694	2.5632	1.6703	2.5666	3.4268	4.2591	6.1308	4.9162
2703.56	-6.51422									71.221	0.35102	1.453	1.649	2.5339	3.3831	4.2048	6.0526	4.8535
2706.22	-9.59535									70.4027	0.3551	1.2254	1.6286	2.5025	3.3412	4.1528	5.9777	4.7935
2706.49	-10.8248									69.603	0.35918	1.6927	1.6091	2.4726	3.3012	4.1031	5.9062	4.7361
2708	-11.7152									68.8193	0.36327	2.2874	1.5905	2.4439	3.263	4.0555	5.8378	4.6812
2708.88	-5.75308									68.055	0.36735	2.5128	1.5727	2.4166	3.2265	4.0101	5.7724	4.6288
2708.88	-5.75308									67.3074	0.37143	2.1648	1.5557	2.3905	3.1916	3.9668	5.71	4.5788
2709.77	-19.856									66.5761	0.37551	1.4058	1.5394	2.3655	3.1583	3.9254	5.6504	4.531
2709.77	-6.07035									65.8605	0.37959	0.74058	1.524	2.3417	3.1265	3.8859	5.5936	4.4854
2709.77	-6.07035									65.1602	0.38367	0.67871	1.5092	2.319	3.0962	3.8483	5.5394	4.4419
2710.04	-5.33448									64.4729	0.38776	1.2683	1.4951	2.2974	3.0674	3.8124	5.4878	4.4005
2710.04	-5.33448									63.8016	0.39184	2.0945	1.4817	2.2768	3.0399	3.7782	5.4386	4.3611
2710.66	-7.60187									63.1441	0.39592	2.645	1.469	2.2573	3.0138	3.7457	5.3918	4.3236
2711.54	-8.26052									62.5	0.4	2.6015	1.4569	2.2387	2.9889	3.7149	5.3474	4.288
2712.42	-5.06826									61.8689	0.40408	1.9886	1.4454	2.221	2.9654	3.6856	5.3053	4.2542
2712.42	-5.06826									61.2505	0.40816	1.2172	1.4345	2.2043	2.943	3.6579	5.2653	4.2222
2713.04	-6.78205									60.6443	0.41224	0.82686	1.4242	2.1885	2.9219	3.6316	5.2275	4.1919
2713.04	-6.78205									60.0485	0.41633	1.0065	1.4145	2.1735	2.902	3.6068	5.1918	4.1633
2715.34	-3.68201									59.4658	0.42041	1.5341	1.4053	2.1594	2.8832	3.5834	5.1582	4.1363
2715.95	-8.75151									58.8942	0.42449	2.0767	1.3967	2.1462	2.8655	3.5614	5.1265	4.1109
2715.95	-9.6148									58.3335	0.42857	2.3369	1.3886	2.1337	2.8488	3.5408	5.0968	4.087
2715.95	-7.26927									57.7834	0.43265	2.1227	1.381	2.1221	2.8333	3.5214	5.069	4.0647
2716.84	-11.4788									57.2436	0.43673	1.5578	1.374	2.1112	2.8188	3.5034	5.043	4.0439
2717.72	-12.441									56.7125	0.44082	1.1356	1.3674	2.1011	2.8053	3.4867	5.0189	4.0246
2720.36	-2.72916									56.1924	0.4449	1.2955	1.3613	2.0918	2.7928	3.4712	4.9966	4.0067
2720.36	-8.43619									55.6818	0.44898	2.1132	1.3557	2.0832	2.7814	3.4569	4.9761	3.9902
2720.36	-17.858									55.1803	0.45306	3.3088	1.3506	2.0753	2.7709	3.4438	4.9573	3.9751
2720.36	-15.5364									54.6878	0.45714	4.2985	1.3459	2.0682	2.7613	3.432	4.9402	3.9615
2722.11	-9.07888									54.2041	0.46122	4.5259	1.3417	2.0617	2.7527	3.4213	4.9248	3.9491
2722.2	-4.23451									53.7276	0.46531	3.8606	1.338	2.056	2.745	3.4118	4.9111	3.9381
2722.99	-8.09718									53.2606	0.46939	2.7884	1.3347	2.0509	2.7383	3.4034	4.899	3.9284
2723.87	-4.73613									52.8017	0.47347	1.8087	1.3319	2.0466	2.7325	3.3961	4.8886	3.9201
2723.87	-4.73613									52.3505	0.47755	0.95908	1.3295	2.0429	2.7276	3.39	4.8798	3.913
2723.87	-7.68206									51.9071	0.48163	0.55678	1.3275	2.0399	2.7235	3.385	4.8726	3.9073
2723.87	-10.611									51.471	0.48571	0.98552	1.326	2.0376	2.7204	3.3812	4.867	3.9028
2723.87	-9.9878									51.0412	0.4898	1.7353	1.3249	2.0359	2.7182	3.3784	4.8631	3.8996
2723.87	-8.55517									50.6196	0.49388	2.3038	1.3243	2.0349	2.7169	3.3767	4.8607	3.8977
2724.74	-9.38629									50.2048	0.49796	2.5831	1.3241	2.0346	2.7164	3.3762	4.8599	3.8971
2724.74	-13.0436
2724.74	-2.85056
2726.18	-4.37624
2726.5	-12.0716
2727.37	-10.6401
2728.24	-7.90472
2728.24	-8.69917
2728.24	-5.01295
2728.24	-6.49124
2729.12	-8.39105
2729.12	-6.43545
2729.12	-8.76983
2729.99	-11.3791
2729.99	-8.80297
2730.86	-3.81178
2731.04	-2.83693
2731.04	-2.83693
2731.74	-6.63476
2731.74	-9.55669
2731.74	-7.27526
2732.61	-8.01624
2733.48	-4.84008
2734.35	-8.54187
2734.35	-3.03441
2735.62	-2.07761
2736.09	-2.05619
2736.96	-4.16947
2736.96	-7.45014
2737.83	-4.33239
2737.83	-3.90774
2737.83	-14.6122
2737.83	-10.0253
2738.7	-3.65073
2738.7	-4.01586
2738.7	-4.01586
2739.56	-10.5753
2739.56	-9.52019
2739.82	-2.99511
2739.82	-2.99511
2742.16	-6.71021
2743.03	-3.83975
2743.03	-3.83975
2744.76	-4.3809
2744.76	-4.3809
2748.21	-6.41886
2749.07	-6.35914
2749.93	-13.7428
2751.69	-2.56208
2752.51	-4.2109
2755.09	-5.18636
2755.94	-6.70696
2755.94	-3.75958
2755.94	-3.75958
2755.94	-10.2134
2756.8	-11.21
2757.66	-6.74626
2760.22	-2.13533
2761.93	-12.7804
2763.64	-7.94131
2769.6	-11.525
2769.6	-11.8802
2772.14	-7.2556
2772.14	-3.3904
2772.14	-3.3904
2773.83	-4.12458
2775.53	-0.569216
2775.53	-6.17014
2775.87	-8.72496
2777.22	-7.38192
2779.75	-2.96351
2780.59	-9.08763
2781.43	-8.45147
2784.8	-12.3867
2785.64	-8.3474
2786.06	-4.94198
2786.48	-9.74974
2787.32	-10.4991
2788.84	-3.60544
2789.83	-11.0961
2790.67	-2.30195
2791.5	-15.177
2792.34	-9.30407
2792.34	-14.178
2794.01	-5.19726
2794.01	-5.17976
2795.68	-4.82355
2797.34	-4.88433
2799.01	-4.28575
2799.01	-2.11766
2799.46	-3.07801
2801.5	-7.9895
2804.82	-3.43234
2805.42	-6.21525
2808.13	-3.25172
2808.13	-0.425289
2809.78	1.97928
2811.3	-6.6602
2811.43	-3.74005
2811.43	-13.9816
2812.26	3.61595
2814.69	-5.21049
2815.52	-3.11035
2816.04	-4.61183
2816.67	-6.85838
2817.08	-5.58284
2819.93	-6.47069
2820.89	-6.45019
2821.29	-5.01681
2821.54	-8.27095
2823.18	-4.74221
2823.83	-7.21918
2824.56	-9.39031
2826.2	-3.86634
2826.36	-6.08071
2827.83	-4.10657
2829.28	-5.19822
2831.08	-4.03158
2831.08	-4.03158
2834.33	-3.8643
2834.87	-4.74395
2835.14	-7.85765
2836.77	-6.85877
2840.81	-6.6202
2841.62	-5.00099
2843.23	-2.96757
2848.06	-2.7515
2852.07	-6.83511
2852.07	-6.83511
2854.48	-5.12019
2858.47	-4.27213
2859.27	-4.3591
2869.59	-4.77434
2869.59	-6.38408
2869.59	-6.38408
2871.18	-4.88461
2871.49	-4.0982
2871.97	-3.53418
2874.34	2.49481
2877.49	-5.02639
2882.99	2.77361
2883.77	-6.30841
2884.55	-5.95209
2884.55	-4.36658
2886.12	-4.76809
2888.46	-2.04342
2890.81	-5.00611
2890.81	-0.998746
2891.59	-4.32903
2893.14	-3.03986
2900.13	-7.08906
2900.91	-3.86932
2901.68	-6.74656
2904.77	-13.7874
2906.01	-4.16686
2907.09	-3.16832
2907.86	-3.88665
2909.4	-1.96053
2910.17	-4.4537
2910.94	-5.1202
2910.94	1.27689
2913.16	-3.74013
2914.01	-1.90109
2917.07	-3.56548
2917.07	-4.6157
2917.84	-4.82173
2920.9	-3.4014
2920.9	-14.6708
2922.42	0.537582
2923.95	-4.31329
2924.71	-2.07349
2925.47	-1.50524
2925.47	-4.9058
2927.75	-4.88312
2929.27	-3.24868
2930.03	-3.38223
2930.79	-5.47695
2930.79	-4.99443
2930.79	-4.99443
2934.57	-5.27636
2934.57	-4.28809
2935.33	-3.19198
2935.33	-2.98385
2935.33	-13.0299
2937.59	-3.12932
2938.35	-2.1253
2938.35	-2.41253
2939.85	-5.1124
2940.61	-4.2775
2940.61	-5.61145
2942.11	-2.74271
2942.86	-2.90941
2943.62	-4.16352
2943.62	-2.24041
2943.62	-0.761625
2945.12	-2.39388
2945.12	-3.30816
2945.87	-1.22019
2945.87	-1.6867
2946.62	-1.59512
2946.62	-2.02079
2951.11	-3.08301
2951.11	-5.62692
2951.11	-3.15424
2951.86	-1.89935
2952.6	-3.60685
2953.35	-4.23637
2954.1	-3.1903
2954.1	-6.04955
2954.1	-3.83888
2954.1	-0.237701
2955.59	-0.937471
2955.59	-3.03133
2955.59	-3.03133
2955.59	-2.26458
2955.59	-6.3736
2956.33	-1.7171
2956.33	2.80906
2956.33	-1.0833
2956.33	-2.50067
2956.82	-1.19212
2957.82	-1.71372
2957.82	-1.71372
2957.82	-3.1604
2958.56	-5.8232
2960.79	-1.29235
2961.53	-2.69641
2961.53	2.69987
2961.53	-1.63449
2961.53	-2.69641
2961.53	-6.0899
2961.53	-1.25988
2961.53	-7.50542
2961.53	-2.12152
2961.53	-3.50895
2962.27	-1.30081
2962.27	-3.4603
2963.02	0.31122
2963.53	-2.70156
2963.76	-0.987675
2963.76	-1.74843
2963.76	-4.55961
2964.5	-1.55247
2965.24	-4.33814
2965.24	-2.72392
2965.98	-1.58939
2966.72	-2.13022
2966.72	-1.70921
2967.46	-3.05904
2967.46	-2.26672
2968.19	1.58736
2968.19	-1.86242
2968.19	-2.059
2968.93	-3.25744
2968.93	-4.7504
2968.93	-1.81725
2968.93	-0.539113
2968.93	-1.14354
2969.67	-4.59328
2969.67	-5.3344
2969.67	-2.86037
2970.41	-4.22635
2970.41	-3.63814
2970.41	-1.17647
2970.41	-1.35174
2971.14	-2.31719
2971.14	-0.920389
2971.14	0.750961
2971.14	-4.28681
2971.14	-4.75757
2971.88	3.47221
2971.88	-0.570836
2971.88	-9.20737
2971.88	-0.815777
2972.62	-2.45289
2972.62	-0.273759
2972.62	-0.273759
2972.91	-3.95166
2973.35	-0.291575
2973.35	-1.63314
2973.35	-1.61214
2973.35	-2.16751
2973.35	-0.0794359
2974.09	-1.12544
2974.09	-1.63557
2974.82	-6.28382
2975.13	-1.70464
2975.56	-2.38244
2975.56	-2.38244
2976.29	2.0885
2976.29	-1.59507
2976.29	-1.69985
2976.29	-1.87479
2977.03	-1.30536
2977.03	-2.28063
2977.32	-9.57474
2977.76	-1.65051
2977.76	-2.98496
2977.76	-1.65051
2977.76	-2.98496
2977.76	-6.36411
2977.76	-1.98196
2977.76	-0.508684
2977.76	-1.8988
2977.76	-0.369893
2978.49	-3.83428
2978.49	-0.433603
2978.49	-2.60079
2978.49	-0.446429
2979.23	-0.899083
2979.23	-9.0236
2979.23	-2.60019
2979.23	-6.06722
2979.23	-1.54593
2979.23	-0.510353
2979.23	-1.39147
2979.81	-6.26672
2979.96	-1.39049
2979.96	0.257127
2980.69	-1.8864
2980.69	-1.58717
2980.69	-1.10818
2980.69	-1.52737
2981.42	-1.31978
2981.42	-0.327225
2981.42	-4.5272
2981.42	-5.84001
2981.42	2.54453
2981.42	-4.9838
2981.42	0.0710878
2981.42	-2.5975
2981.42	0.492683
2981.5	-1.91542
2982.15	-3.5961
2982.15	-1.14305
2982.15	-3.5961
2982.15	0.211125
2982.15	-4.40323
2982.15	-0.970474
2982.89	-2.77841
2982.89	-0.0843352
2982.89	-0.448368
2982.89	2.15772
2982.89	-2.22869
2982.89	-0.784581
2982.89	-2.22869
2982.89	-0.267987
2983.62	-2.23656
2983.62	-2.10802
2983.62	-0.946936
2983.62	-2.37813
2983.62	-1.78096
2983.62	-1.19204
2983.62	-4.10079
2983.62	-6.99339
2983.62	-3.79156
2983.62	-4.68971
2983.62	-2.50907
2984.35	-0.478318
2984.35	-0.478318
2984.35	-4.77855
2984.35	-8.87571
2984.35	-6.87638
2984.35	-1.96866
2985.08	-11.6
2985.08	-2.60691
2985.08	-1.36958
2985.08	-6.22653
2985.08	-2.8246
2985.08	-1.06671
2985.08	-2.5797
2985.8	-0.500628
2985.8	-2.05208
2985.8	-1.41758
2985.8	-1.84547
2985.8	-1.44274
2985.8	-0.702491
2985.88	-8.59366
2986.1	-2.40935
2986.53	1.79886
2986.53	-2.67192
2986.53	-2.22848
2986.53	-0.720218
2986.53	-1.15794
2986.53	-2.67192
2986.53	-2.22848
2986.53	-6.04956
2986.53	-2.03291
2986.53	-4.50646
2986.53	2.58204
2986.53	-0.670923
2986.53	-3.54488
2986.53	-1.53068
2986.53	-1.70137
2986.53	-1.5492
2986.53	-0.646672
2987.26	3.15175
2987.26	-2.7335
2987.26	0.293923
2987.26	-1.82703
2987.26	-4.28814
2987.99	-2.13466
2987.99	-0.731059
2987.99	-0.453045
2987.99	-0.61941
2987.99	-2.20158
2987.99	-0.61941
2987.99	-3.97218
2987.99	-2.87247
2988.21	-2.77979
2988.72	-1.88542
2988.72	-0.811998
2988.72	-1.88542
2988.72	1.04069
2988.72	-5.64467
2988.72	-1.84992
2988.72	-0.94491
2989.01	-3.42527
2989.45	-1.96588
2989.45	-2.05558
2989.45	-1.65122
2989.45	0.00982593
2989.45	-2.05558
2989.45	-3.81253
2989.45	-3.97768
2990.17	-2.85913
2990.17	-2.66035
2990.17	0.446549
2990.17	-1.42762
2990.17	-0.15075
2990.17	-1.5633
2990.17	-0.199914
2990.17	-1.8051
2990.61	-3.83988
2990.9	-3.14679
2990.9	-1.43468
2990.9	-0.870441
2990.9	-5.55761
2990.9	-5.06737
2990.9	-3.70048
2990.9	-2.37947
2991.41	-2.52479
2991.63	-1.41474
2991.63	-3.09514
2991.63	0.90463
2991.63	-1.31191
2991.63	-2.12321
2991.63	-6.31644
2991.63	-2.83125
2991.63	3.77124
2991.63	0.287174
2992.35	-1.77298
2992.35	-0.961062
2992.35	0.18167
2992.35	-1.44548
2992.35	-4.9835
2993.08	-4.89273
2993.08	-1.29137
2993.08	-0.613496
2993.08	-1.24969
2993.08	-2.27306
2993.08	-2.90498
2993.08	-4.56984
2993.08	-1.94769
2993.08	-1.02153
2993.15	-2.04511
2993.15	-2.04511
2993.8	0.0253041
2993.8	-2.07325
2993.8	-1.46357
2993.8	0.588383
2993.8	-0.384353
2993.8	-5.04776
2993.8	-1.83684
2994.53	-0.154072
2994.53	0.701
2994.53	-1.08669
2994.53	-2.15361
2994.53	-3.01652
2994.53	-0.361392
2994.53	-2.06888
2994.53	-1.04814
2994.53	-2.16635
2994.53	-1.66225
2994.53	-0.410783
2995.25	-2.33363
2995.25	-0.813206
2995.25	-1.51883
2995.25	0.113054
2995.25	-2.12247
2995.25	-0.184441
2995.25	0.113054
2995.25	-0.7133
2995.25	0.240904
2995.98	-1.76548
2995.98	-1.13391
2995.98	0.73755
2996.7	-2.67004
2996.7	-1.94024
2996.7	-0.914369
2996.7	-1.71704
2996.7	1.27941
2996.7	-2.72064
2996.7	-0.672217
2997.42	-1.87612
2997.42	-1.40416
2997.42	-0.715373
2997.42	-2.54315
2997.42	1.18433
2997.42	-1.47812
2997.42	-2.54315
2997.42	-2.08599
2997.42	-2.25809
2997.42	-1.99886
2997.42	-2.48539
2997.42	-2.16763
2997.42	0.0521791
2998.15	-1.62218
2998.15	-3.09908
2998.15	-1.02497
2998.15	-3.09908
2998.15	-4.123
2998.15	-4.08103
2998.87	-2.03113
2998.87	-0.708826
2998.87	-2.03113
2998.87	-1.7361
2998.87	-2.49902
2998.87	-0.719535
2999.59	0.217535
2999.59	-0.875146
2999.59	0.00937843
2999.59	-2.0293
2999.59	-0.607892
2999.59	-0.998133
2999.59	-0.998133
2999.59	-1.52881
2999.59	-0.064343
2999.59	-3.08819
3000.1	-3.09556
3000.31	0.752923
3000.31	1.6016
3000.31	-1.17377
3000.31	-2.00897
3000.31	-3.02084
3000.31	-1.86538
3000.31	-0.306318
3000.31	-0.909285
3000.31	-3.40807
3000.31	-1.22713
3000.31	-0.33506
3001.04	-1.99376
3001.04	-1.2167
3001.04	-1.2167
3001.04	-2.05295
3001.04	-3.34918
3001.76	-0.43817
3001.76	-1.04491
3001.76	-0.237127
3001.76	-0.0021345
3001.76	-1.28604
3001.76	-1.54241
3001.76	-1.23995
3001.76	0.0554419
3001.76	-0.882108
3001.76	0.00555964
3001.76	-1.28604
3001.76	-1.54241
3001.76	-1.59969
3001.76	-4.40922
3001.76	-4.81194
3001.76	-1.63824
3001.76	-0.746114
3001.76	-0.452263
3002.48	1.3286
3002.48	-3.28126
3002.48	-0.0654525
3002.48	-1.49542
3002.48	-1.49542
3002.48	-1.57665
3002.48	-0.917314
3002.48	-4.02746
3002.48	-1.52679
3002.48	0.0167313
3002.48	-3.3496
3002.48	0.317227
3002.69	0.649169
3002.77	-3.47164
3003.2	-2.23068
3003.2	-1.41847
3003.2	-1.76977
3003.2	0.840242
3003.2	-1.5242
3003.2	0.538262
3003.2	-1.12816
3003.2	-1.1581
3003.2	-1.46407
3003.2	-3.79857
3003.2	-2.75746
3003.92	-2.38922
3003.92	-1.76472
3003.92	-0.54677
3003.92	-2.08607
3003.92	0.21087
3003.92	-1.13252
3003.92	-1.43275
3003.92	-1.05665
3003.92	-1.76472
3003.92	-1.39089
3003.92	-2.1613
3003.92	-0.0742042
3003.92	-0.742501
3004.64	-0.932296
3004.64	-1.57856
3004.64	-0.700399
3004.64	0.247679
3004.64	-0.41223
3004.64	1.71524
3005.36	0.0667702
3005.36	-0.689943
3005.36	-0.612605
3005.36	-2.33192
3005.36	-1.51535
3005.36	-1.58205
3005.36	-2.98517
3005.36	-2.63781
3005.36	1.12769
3005.36	-3.06524
3005.72	-1.68717
3006.08	-2.5102
3006.08	-0.770581
3006.08	-0.0692436
3006.08	-1.40493
3006.08	-1.62242
3006.08	-1.40493
3006.08	-2.49926
3006.08	-2.06263
3006.08	-2.94
3006.8	-0.376628
3006.8	0.757648
3006.8	-2.70625
3006.8	-0.68597
3006.8	-4.58356
3007.51	-0.74309
3007.51	0.148631
3007.51	-1.31075
3007.51	0.103802
3007.51	-2.03261
3007.51	-1.27213
3007.51	-0.461922
3007.51	1.1496
3007.51	0.103802
3007.51	-2.03261
3007.51	1.1496
3007.51	-2.42868
3007.51	-1.18516
3007.51	-3.29397
3008.23	-0.449321
3008.23	-1.75249
3008.23	-0.627826
3008.23	0.587597
3008.23	-1.55134
3008.23	-0.699989
3008.23	-1.59903
3008.23	-2.87607
3008.23	-4.17884
3008.23	-0.083408
3008.23	-0.812199
3008.95	-0.927051
3008.95	0.760653
3008.95	-1.42829
3008.95	-1.96012
3008.95	-3.4779
3008.95	-1.96012
3008.95	-3.4779
3008.95	-3.1064
3008.95	-0.888016
3008.95	-2.1086
3009.67	-1.72928
3009.67	1.65766
3009.67	0.313499
3009.67	-0.0669517
3009.67	-0.0248012
3009.67	-2.43537
3009.67	1.77633
3009.67	-1.16815
3010.38	-2.27381
3010.38	-2.02695
3010.38	-2.06656
3010.38	-0.794895
3010.38	-1.33877
3010.38	0.460565
3010.38	-1.6353
3010.38	-0.867174
3011.1	-3.15155
3011.1	-3.15155
3011.1	0.294817
3011.1	-2.91775
3011.1	-3.31738
3011.82	-2.49139
3011.82	-0.479853
3011.82	-0.157151
3011.82	-0.321307
3011.82	-1.24375
3011.82	-1.54505
3011.82	-1.29374
3012.53	-0.397739
3012.53	-2.15321
3012.53	-1.46956
3012.53	-6.10763
3012.53	-4.59044
3013.25	0.379811
3013.25	-1.4702
3013.25	-3.99584
3013.25	-1.60175
3013.25	-3.61167
3013.96	-1.29187
3013.96	0.203211
3013.96	-2.26663
3013.96	-2.38659
3014.68	-0.38526
3014.68	-0.571163
3014.68	-1.09284
3015.39	-0.489821
3015.39	1.32836
3015.39	-1.29672
3015.39	-0.228231
3015.39	-0.933805
3015.39	-2.46602
3016.11	-1.81679
3016.11	-0.749975
3016.11	-1.67195
3016.11	1.39246
3016.11	-1.67195
3016.11	-1.86173
3016.11	-1.27215
3016.82	-1.42372
3016.82	-3.069
3016.82	-1.13587
3016.82	-1.55582
3016.82	0.080518
3017.53	-2.43347
3017.53	-1.44379
3017.53	-1.59041
3017.53	-1.28783
3017.53	-2.9041
3018.25	-1.39563
3018.25	2.58475
3018.25	-1.37248
3018.25	0.867297
3018.25	-2.21923
3018.25	-0.800631
3018.25	-2.85405
3018.96	1.49482
3018.96	-0.19114
3018.96	-1.96486
3018.96	-0.28736
3018.96	-1.00452
3018.96	-1.07083
3018.96	-3.18127
3018.96	0.730479
3019.67	-4.56729
3019.67	0.507125
3019.67	0.336403
3020.38	-0.823026
3020.38	-0.579964
3020.38	-0.523305
3021.09	-0.719454
3021.09	-6.22666
3021.09	-1.76132
3021.09	-0.817931
3021.8	-2.29339
3021.8	0.133617
3022.52	-0.897494
3022.52	-0.897494
3022.52	-5.45234
3022.52	-0.734025
3023.23	-0.80805
3023.23	-2.31995
3023.23	-0.0959661
3023.23	1.79585
3023.23	-1.28565
3023.23	-2.01275
3023.94	-1.15688
3023.94	-0.365221
3023.94	-1.74621
3024.65	-1.9281
3024.65	-0.747264
3024.65	0.273553
3024.65	1.02444
3024.65	0.614633
3024.65	0.273553
3024.65	-1.91878
3024.65	-0.224732
3025.35	-0.261609
3025.35	-1.0836
3025.35	-0.539463
3025.35	-2.1276
3025.35	-0.205063
3025.35	-0.628835
3025.35	-2.1276
3025.35	0.708994
3026.06	-2.31139
3026.06	-1.45081
3026.06	-1.92821
3026.06	-0.571471
3026.06	1.12109
3026.06	-1.92821
3026.77	-0.181411
3027.48	-4.21996
3027.48	-0.523583
3027.48	-2.23412
3027.48	-0.523583
3027.48	-2.23412
3027.48	-2.64153
3028.19	-0.281439
3028.9	-1.13336
3028.9	-2.62553
3028.9	-0.752097
3029.6	-3.89303
3029.6	-3.3932
3029.6	-0.865001
3029.6	0.668216
3030.31	-2.65115
3030.31	1.4965
3030.31	-0.257124
3030.31	-0.837795
3030.31	-3.71532
3030.31	-1.88136
3031.02	-2.46982
3031.02	-3.33513
3031.72	-0.816957
3031.72	-0.960526
3032.43	-1.6164
3032.43	0.781496
3033.13	-4.39977
3033.13	0.633031
3033.84	0.0585441
3033.84	0.445674
3033.84	-2.2217
3033.84	0.260321
3034.54	0.473169
3034.54	-0.789038
3034.54	-1.65689
3034.54	0.473169
3035.25	-2.90905
3035.25	-2.90905
3035.25	-1.49377
3035.95	-4.04921
3035.95	-1.30152
3035.95	-1.30152
3035.95	-1.17484
3036.66	-0.262071
3036.66	-0.886129
3036.66	-0.493818
3038.06	-0.507448
3038.06	-1.64201
3038.06	-4.21116
3038.76	-0.926048
3038.76	-1.68967
3038.76	-0.938792
3038.76	-5.27823
3039.47	-1.20941
3039.47	0.790789
3039.47	-0.389628
3039.47	-0.086387
3039.89	-0.842158
3039.89	-0.842158
3040.17	-0.28484
3040.17	-3.65506
3040.17	-0.726833
3040.17	-3.77907
3040.17	-1.40049
3040.87	-1.80237
3041.57	-1.54899
3041.57	0.182081
3041.57	-1.04233
3041.57	-1.22426
3042.27	0.19947
3042.97	-1.28549
3043.67	1.14801
3044.37	-1.93989
3044.37	-1.77481
3045.07	-1.89822
3045.07	1.18693
3045.07	-4.15615
3046.47	0.298153
3046.47	0.0887835
3047.17	-0.535905
3047.17	-0.535905
3048.56	-0.196271
3048.56	-0.560866
3048.56	-1.08298
3049.26	-2.30662
3049.26	-5.11435
3049.96	-1.27311
3049.96	-0.710257
3049.96	2.13594
3049.96	-0.891643
3049.96	-0.886525
3049.96	-0.48938
3049.96	0.0468383
3050.66	-3.74655
3050.66	-0.968392
3050.66	-0.552687
3051.35	-1.80997
3051.35	-0.717277
3051.35	-0.675562
3051.35	-1.52077
3052.05	-1.12463
3054.13	0.664255
3054.13	-0.171717
3054.83	-0.602251
3054.83	-1.68457
3054.83	-2.97452
3055.52	-0.217745
3056.22	0.396795
3057.6	-2.60116
3057.6	-1.15706
3057.6	-2.06142
3058.3	-0.887728
3058.99	-4.22665
3058.99	-4.22665
3058.99	0.775088
3059.68	-2.01976
3059.68	-1.2763
3061.76	0.783077
3062.45	0.47008
3063.83	-1.47313
3063.83	1.30791
3064.52	-1.8827
3067.27	-4.40794
3071.4	-3.47074
3075.51	-1.45741
3084.38	1.99513
3091.84	-1.07275
3092.52	0.988278
3095.89	0.695279
3097.24	-2.46157
3099.93	1.26896
3105.31	1.28253
3112.66	-1.40813
3118.64	-0.0750665
3129.88	-0.479631
3131.2	-10.2289
3143.38	2.82394
3146.25	-0.569054
3152.09	-0.831073
3154.68	-0.777519
3156.62	-1.50175
3156.62	0.550213
3181.6	-3.53829
3181.6	1.76018
3182.23	2.4612
3184.77	-4.38299
3188.56	1.88896
3189.19	4.69617
3192.34	0.0232121
3194.23	-0.61914
3198.63	-0.928847
3199.26	0.451625
3199.26	1.31175
3200.51	0.562614
3201.76	-0.911599
3203.01	-0.0348638
3203.64	1.52343
3203.64	0.299615
3204.26	-0.959704
3204.89	1.63655
3205.51	1.52721
3205.51	0.139928
3206.13	-3.79841
3209.25	1.77666
3209.87	-2.5215
3210.49	-0.295752
3210.49	-2.79418
3210.49	-3.87663
3212.36	0.626392
3212.36	-0.240316
3212.98	-5.17555
3212.98	-3.2156
3213.6	1.13602
3214.22	-1.06884
3218.55	-0.669401
3219.17	0.110419
3220.41	1.30537
3221.02	-0.922626
3222.26	-1.96258
3222.87	0.493797
3223.49	2.10977
3224.11	-1.96897
3224.11	0.100067
3224.72	1.78882
3224.72	-2.15964
3225.34	-0.556206
3228.41	-1.39166
3229.02	-0.290341
3229.64	-3.11343
3230.25	-0.014767
3230.25	-2.59563
3230.86	-1.23737
3230.86	-8.54525
3231.48	-0.46116
3232.09	-3.53759
3232.7	-4.6442
3233.92	1.69597
3234.53	1.27989
3235.15	1.18145
3235.15	0.505235
3235.15	-0.38464
3238.2	-1.18414
3240.02	-2.68745
3240.02	-4.7197
3240.63	-0.5935
3241.24	0.30274
3241.24	0.336412
3243.07	0.198876
3244.28	-3.78758
3244.28	-6.77338
3244.89	-1.62276
3246.71	0.875926
3249.13	-2.95014
3250.34	2.16398
3250.34	-3.90848
3250.94	-5.93747
3251.54	-1.72945
3251.54	-6.17679
3254.56	-1.56345
3255.16	-5.29325
3265.36	-3.05166
3344.97	-10.0489
3403.06	-5.97753
3403.06	-9.51142
3426.16	-8.02854
3439.95	-5.31629
3473.32	-5.05822
3479.49	-7.00366
3498.34	-2.56003
3505.4	-3.54584
3509.93	-5.4521
3543.15	-2.74421
3547.06	-3.71023
3552.42	-3.03115
3553.4	-5.40594
3564.05	-2.34431
3565.98	-1.67398
3568.87	-1.91074
3578.94	-3.93047
3585.6	-1.8195
3590.35	-3.18681
3599.32	-2.65854
3602.14	-3.10999
3602.61	-1.93662
3605.42	-5.48868
3609.63	-0.910457
3612.89	-1.0783
3624.03	-2.44907
3635.54	-3.77929
3640.57	-1.47583
3648.77	-1.81973
3649.22	-0.917323
3649.22	0.0880712
3663.67	-2.78038
3676.63	0.0608795
3677.08	-1.46705
3688.59	-1.85985
3694.32	-0.396955
3710.48	-0.193432
3720.43	0.255886
3730.31	1.63657
3732.44	1.02132
3761.62	-1.55729
3768.3	-0.87237
3798.36	0.0530855
3807.7	-0.760761
3808.51	-0.761981
3818.98	0.306707
3860.1	0.975402
3861.66	-0.850051

## Sheet: Supplementary table 3
Supplemental Table S3: Zircon Hf isotope time series (Pilbara Craton), quantiles, and spectral analysis.
Timeseries			Quartiles on 25 moving bin							REDFIT spectral analysis (rectangle window, 2 segments)
Age (Ma)	εHfi		Age	0	0.25	0.5	0.75	1		Frequency (in Ma)	Freq	Power	Theor.AR(1)	chi2 80%	chi2 90%	chi2 95%	chi2 99%	chi2 crit.
3405	10.6		2825	-6.68276	-6.41261	-6.14247	-5.87232	-5.60218			0	1.0682e-31	32.679	50.215	67.044	83.327	119.95	87.535
3292	9.4		2850	-5.63107	-5.2664	-4.45264	-2.47622	-1.02613		5400.03	0.0046296	0.0073074	32.533	49.99	66.744	82.954	119.41	87.143
3308	8.5		2875	-3.56964	-2.84033	-2.11102	-1.38171	-0.652405		2699.99	0.0092593	0.1258	32.102	49.328	65.859	81.856	117.83	85.989
3319	8.3		2900	-2.6825	-2.6825	-2.6825	-2.6825	-2.6825		1799.99	0.013889	0.7123	31.409	48.263	64.438	80.088	115.28	84.132
3282	8.2		2925	-8.34113	-5.00857	-2.99562	-1.41846	1.72844		1349.96	0.018519	2.5527	30.488	46.848	62.549	77.741	111.9	81.666
3516	8.2		2950	-7.2935	-4.78881	-2.87965	-0.191037	2.83222		1080.01	0.023148	6.7937	29.382	45.148	60.28	74.92	107.84	78.703
3287	7.9		2975	-2.08593	-1.82141	-1.55689	-1.29237	-1.02785		899.993	0.027778	13.685	28.136	43.234	57.724	71.744	103.27	75.366
3420	7.2		3000	-3.04637	-2.83567	-2.62498	-2.41428	-2.20359		771.438	0.032407	21.054	26.795	41.174	54.973	68.325	98.352	71.775
3248	7.1		3025	3.48511	3.48511	3.48511	3.48511	3.48511		675.001	0.037037	26.64	25.402	39.033	52.114	64.772	93.236	68.042
3261	7.1		3075	-1.97215	-0.903266	0.165619	1.34094	2.51625		599.995	0.041667	30.61	23.991	36.865	49.219	61.174	88.057	64.263
3313	6.9		3125	-0.971179	0.577895	2.12697	3.67604	5.22512		540.003	0.046296	33.874	22.592	34.715	46.349	57.607	82.923	60.515
3291	6.9		3150	1.52296	1.52296	1.52296	1.52296	1.52296		490.908	0.050926	36.378	21.228	32.619	43.551	54.128	77.915	56.861
3305	6.6		3175	-4.34057	3.12218	3.69266	5.10022	6.48371		449.996	0.055556	37.316	19.915	30.601	40.857	50.78	73.096	53.344
3174	6.5		3200	-3.12778	0.955649	2.02287	3.02843	6.08673		415.386	0.060185	36.108	18.664	28.68	38.291	47.592	68.506	49.994
3259	6.4		3225	-5.04279	-2.9264	-2.14309	0.130589	4.36771		385.713	0.064815	32.619	17.483	26.864	35.868	44.579	64.17	46.83
3300	6.4		3250	-5.60432	-2.8528	-1.61709	-0.238649	7.09882		360.002	0.069444	27.079	16.374	25.161	33.593	41.752	60.101	43.86
3278	6.1		3275	-6.08077	-2.25805	-0.722193	1.47953	7.06472		337.5	0.074074	20.421	15.339	23.57	31.469	39.112	56.301	41.087
3278	6.1		3300	-6.33797	-0.981032	0.278359	1.29469	9.359		317.646	0.078704	14.089	14.376	22.09	29.493	36.656	52.765	38.507
3179	6.1		3325	-4.96421	-1.01552	0.287914	1.46439	8.46429		300.001	0.083333	9.0936	13.482	20.717	27.66	34.378	49.485	36.114
3271	6		3350	-2.57624	0.013193	0.750277	2.68317	5.36406		284.21	0.087963	5.6295	12.655	19.446	25.963	32.268	46.449	33.898
3312	6		3375	-1.6252	-1.31321	-1.00123	-0.689243	-0.377258		269.999	0.092593	3.4788	11.89	18.27	24.394	30.318	43.642	31.849
3250	6		3400	-0.847106	-0.366179	0.163612	0.827563	1.77838		257.143	0.097222	2.3814	11.184	17.185	22.944	28.517	41.049	29.957
3296	5.6		3425	-5.5309	-0.104023	0.528807	1.08313	10.608		245.459	0.10185	2.1325	10.531	16.183	21.606	26.854	38.655	28.21
3314	5.4		3450	-3.74907	-0.616818	0.395457	1.65236	3.95756		234.786	0.10648	2.584	9.9291	15.257	20.371	25.318	36.444	26.597
3341	5.4		3475	-3.93388	0.37868	0.80595	1.57808	3.08945		225.002	0.11111	3.6141	9.3731	14.403	19.23	23.9	34.403	25.107
3174	5.3		3500	0.650652	1.60154	1.8508	2.73233	3.2246		216.001	0.11574	5.0881	8.8594	13.613	18.176	22.591	32.518	23.731
3265	5.3		3525	2.60735	3.09874	3.59014	5.87802	8.1659		207.693	0.12037	6.895	8.3847	12.884	17.202	21.38	30.776	22.459
3245	5.2		3550	-2.42521	0.55712	3.53945	3.66135	3.78326		200	0.125	9.0052	7.9456	12.209	16.301	20.26	29.164	21.283
3104	5.2		3575	-3.14653	-2.8261	-1.96302	-1.28682	-0.9132		192.857	0.12963	11.354	7.5391	11.585	15.467	19.224	27.672	20.194
3163	5.2		3600	-3.31048	-1.61913	-1.35882	-1.10209	-0.356837		186.206	0.13426	13.605	7.1625	11.006	14.694	18.263	26.289	19.186
3301	5.1		3625	-3.29833	-1.65709	-1.40275	-0.805826	0.0048253		179.999	0.13889	15.133	6.8132	10.469	13.978	17.373	25.007	18.25
3319	5.1		3650	-3.34309	-1.98031	-1.70349	-1.40752	-0.263796		174.192	0.14352	15.38	6.4889	9.9709	13.313	16.546	23.817	17.381
3164	5.1		3675	-1.34207	-0.740078	-0.576914	-0.165329	0.285854		168.748	0.14815	14.206	6.1876	9.5079	12.694	15.778	22.711	16.574
3271	4.7		3700	-3.50385	-2.58545	-1.66706	-0.748672	0.16972		163.634	0.15278	11.892	5.9073	9.0771	12.119	15.063	21.682	15.823
3324	4.7		3725	-3.01287	-3.01287	-3.01287	-3.01287	-3.01287		158.821	0.15741	8.9339	5.6462	8.676	11.584	14.397	20.724	15.124
3278	4.6		-	-	-	-	-	-		154.283	0.16204	5.8649	5.4028	8.302	11.084	13.777	19.831	14.472
3315	4.5		3800	-3.04253	-3.04253	-3.04253	-3.04253	-3.04253		149.997	0.16667	3.2126	5.1757	7.953	10.618	13.197	18.997	13.864
3325	4.4									145.943	0.1713	1.5403	4.9635	7.6269	10.183	12.656	18.218	13.295
3201	4.4									142.102	0.17593	1.3495	4.765	7.3219	9.7758	12.15	17.49	12.764
3271	4.3									138.458	0.18056	2.7757	4.5792	7.0364	9.3947	11.676	16.808	12.266
3336	4.3									134.996	0.18519	5.4168	4.4051	6.7689	9.0375	11.233	16.169	11.8
3413	4.2									131.711	0.18981	8.5676	4.2418	6.518	8.7024	10.816	15.569	11.362
3173	4.1									128.574	0.19444	11.572	4.0885	6.2824	8.3879	10.425	15.007	10.951
3313	4.1									125.584	0.19907	13.935	3.9444	6.0609	8.0922	10.058	14.478	10.565
3311	4									122.73	0.2037	15.259	3.8088	5.8527	7.8141	9.7121	13.98	10.202
3226	4									120.002	0.20833	15.249	3.6812	5.6566	7.5523	9.3867	13.512	9.8606
3314	4									117.393	0.21296	13.846	3.561	5.4718	7.3057	9.0801	13.07	9.5385
3431	4									114.895	0.21759	11.363	3.4476	5.2976	7.073	8.791	12.654	9.2348
3449	3.9									112.501	0.22222	8.4345	3.3406	5.1332	6.8535	8.5181	12.261	8.9482
3413	3.9									110.205	0.22685	5.6977	3.2395	4.9779	6.6462	8.2604	11.89	8.6775
3323	3.9									108.001	0.23148	3.5117	3.144	4.8311	6.4502	8.0168	11.54	8.4216
3538	3.8									105.883	0.23611	1.9542	3.0536	4.6922	6.2648	7.7864	11.208	8.1796
3266	3.8									103.846	0.24074	0.97886	2.9681	4.5608	6.0894	7.5684	10.894	7.9505
3171	3.7									101.887	0.24537	0.49183	2.8871	4.4364	5.9232	7.3619	10.597	7.7336
3292	3.7									100	0.25	0.35308	2.8104	4.3185	5.7658	7.1662	10.315	7.528
3295	3.6									98.1817	0.25463	0.4292	2.7376	4.2066	5.6165	6.9806	10.048	7.333
3161	3.6									96.4283	0.25926	0.67761	2.6686	4.1005	5.4748	6.8045	9.7948	7.1481
3523	3.6									94.7364	0.26389	1.1438	2.603	3.9998	5.3403	6.6374	9.5543	6.9725
3269	3.6									93.1029	0.26852	1.8651	2.5408	3.9042	5.2126	6.4787	9.3258	6.8058
3447	3.6									91.5248	0.27315	2.8076	2.4816	3.8133	5.0913	6.3279	9.1088	6.6474
3538	3.5									89.9993	0.27778	3.8956	2.4254	3.7269	4.976	6.1846	8.9024	6.4968
3329	3.5									88.5238	0.28241	5.0405	2.372	3.6448	4.8663	6.0483	8.7062	6.3537
3020	3.5									87.0959	0.28704	6.0964	2.3211	3.5667	4.762	5.9186	8.5196	6.2175
3300	3.5									85.7133	0.29167	6.815	2.2727	3.4923	4.6627	5.7952	8.342	6.0878
3311	3.4									84.3739	0.2963	6.9174	2.2267	3.4215	4.5682	5.6778	8.1729	5.9645
3309	3.4									83.0758	0.30093	6.2763	2.1828	3.3542	4.4783	5.566	8.012	5.847
3448	3.4									81.817	0.30556	5.0501	2.1411	3.29	4.3926	5.4595	7.8587	5.7351
3171	3.4									80.5958	0.31019	3.6026	2.1013	3.2289	4.311	5.3581	7.7127	5.6286
3325	3.4									79.413	0.31481	2.2815	2.0634	3.1706	4.2333	5.2614	7.5736	5.5271
3446	3.4									78.262	0.31944	1.3047	2.0273	3.1152	4.1592	5.1694	7.4411	5.4304
3255	3.2									77.1438	0.32407	0.80747	1.9929	3.0623	4.0886	5.0817	7.3148	5.3382
3339	3.2									76.0572	0.3287	0.8705	1.9601	3.0119	4.0214	4.9981	7.1945	5.2504
3437	3.2									75.0008	0.33333	1.4516	1.9289	2.9639	3.9573	4.9184	7.0799	5.1668
3484	3.2									73.9733	0.33796	2.3391	1.8991	2.9182	3.8962	4.8426	6.9707	5.0871
3254	3.2									72.9735	0.34259	3.2219	1.8708	2.8747	3.8381	4.7703	6.8666	5.0111
3180	3.2									72.0005	0.34722	3.836	1.8438	2.8332	3.7827	4.7014	6.7675	4.9388
3429	3.2									71.053	0.35185	4.068	1.8181	2.7937	3.7299	4.6359	6.6732	4.87
3288	3.2									70.1302	0.35648	3.9292	1.7936	2.7561	3.6797	4.5735	6.5833	4.8044
3318	3.2									69.231	0.36111	3.474	1.7703	2.7203	3.632	4.5141	6.4978	4.742
3167	3.2									68.3546	0.36574	2.79	1.7482	2.6862	3.5865	4.4576	6.4165	4.6827
3276	3.1									67.5001	0.37037	2.0286	1.7271	2.6539	3.5433	4.4039	6.3392	4.6263
3321	3.1									66.6667	0.375	1.3644	1.7071	2.6231	3.5023	4.3529	6.2658	4.5727
3221	3.1									65.8536	0.37963	0.90757	1.6881	2.5939	3.4633	4.3045	6.1961	4.5218
3438	3.1									65.0601	0.38426	0.67517	1.6701	2.5663	3.4263	4.2585	6.13	4.4735
3465	3.1									64.2855	0.38889	0.62806	1.653	2.54	3.3913	4.215	6.0673	4.4278
3287	3.1									63.5292	0.39352	0.71467	1.6368	2.5152	3.3581	4.1738	6.0079	4.3845
3446	3									62.7904	0.39815	0.89461	1.6216	2.4917	3.3268	4.1348	5.9518	4.3436
3290	3									62.0686	0.40278	1.1457	1.6071	2.4695	3.2972	4.098	5.8989	4.3049
3165	3									61.3632	0.40741	1.4597	1.5935	2.4486	3.2692	4.0633	5.8489	4.2684
3227	2.9									60.6737	0.41204	1.8278	1.5807	2.4289	3.243	4.0306	5.8019	4.2342
3326	2.9									59.9995	0.41667	2.2286	1.5687	2.4105	3.2183	4	5.7578	4.2019
3321	2.9									59.3401	0.4213	2.64	1.5574	2.3932	3.1952	3.9713	5.7165	4.1718
3453	2.9									58.6951	0.42593	3.0703	1.5469	2.377	3.1736	3.9444	5.6778	4.1436
3284	2.8									58.0639	0.43056	3.5751	1.5371	2.3619	3.1535	3.9194	5.6419	4.1173
2940	2.8									57.4462	0.43519	4.2067	1.528	2.3479	3.1348	3.8962	5.6085	4.093
3280	2.8									56.8427	0.43981	4.9092	1.5196	2.335	3.1176	3.8748	5.5776	4.0704
3284	2.8									56.2506	0.44444	5.4572	1.5119	2.3232	3.1017	3.8551	5.5492	4.0497
3443	2.8									55.6706	0.44907	5.5556	1.5048	2.3123	3.0872	3.8371	5.5233	4.0308
3301	2.8									55.1025	0.4537	5.1444	1.4984	2.3024	3.0741	3.8207	5.4998	4.0136
3438	2.8									54.5459	0.45833	4.5386	1.4926	2.2936	3.0622	3.806	5.4786	3.9982
3476	2.7									54.0003	0.46296	4.073	1.4875	2.2857	3.0517	3.7929	5.4597	3.9844
3446	2.7									53.4656	0.46759	3.7498	1.483	2.2787	3.0424	3.7814	5.4431	3.9723
3249	2.7									52.9414	0.47222	3.2957	1.4791	2.2727	3.0344	3.7714	5.4288	3.9619
3437	2.7									52.4274	0.47685	2.5929	1.4758	2.2677	3.0277	3.763	5.4167	3.953
3310	2.7									51.9232	0.48148	1.8725	1.4731	2.2636	3.0222	3.7562	5.4069	3.9459
3307	2.7									51.4287	0.48611	1.3383	1.471	2.2604	3.0179	3.7509	5.3992	3.9403
3300	2.6									50.9435	0.49074	1.01	1.4695	2.2581	3.0148	3.7471	5.3938	3.9363
3296	2.6									50.4673	0.49537	0.8395	1.4686	2.2567	3.013	3.7448	5.3905	3.9339
3312	2.6									50	0.5	0.60975	1.4683	2.2562	3.0124	3.7441	5.3894	3.9331
3514	2.6
3429	2.6
3303	2.6
3294	2.6
3310	2.5
3314	2.5
3178	2.5
3071	2.5
3299	2.5
3254	2.5
3284	2.4
3297	2.4
3288	2.4
3226	2.4
3316	2.4
3268	2.3
3437	2.3
3435	2.3
3469	2.3
3449	2.2
3302	2.2
3421	2.2
3269	2.2
3305	2.2
3297	2.2
3426	2.1
3229	2.1
3407	2.1
3302	2.1
3323	2.1
3280	2.1
3252	2.1
3300	2.1
3462	2.1
3318	2.1
3170	2
3315	2
3297	2
3323	2
3269	2
3340	2
3300	2
3284	2
3324	1.9
3322	1.9
3292	1.9
3312	1.9
3313	1.9
3243	1.9
3430	1.9
3289	1.9
3315	1.9
3300	1.9
3302	1.9
3466	1.9
3416	1.9
3481	1.9
3438	1.8
3294	1.8
2926	1.8
3308	1.8
3239	1.8
3269	1.8
3294	1.8
3397	1.8
3321	1.8
3288	1.8
3432	1.8
3242	1.7
2915	1.7
3304	1.7
3398	1.7
3318	1.7
3308	1.7
3293	1.7
3452	1.7
3341	1.7
3425	1.7
3306	1.7
3340	1.6
3463	1.6
3453	1.6
3484	1.6
3455	1.6
3412	1.6
3218	1.6
3295	1.5
3259	1.5
3323	1.5
3303	1.5
3176	1.5
3293	1.5
3142	1.5
3302	1.5
3468	1.5
3439	1.5
3307	1.5
3468	1.5
3243	1.5
3270	1.5
3307	1.5
3295	1.4
3421	1.4
3275	1.4
3236	1.4
3311	1.4
3465	1.4
3294	1.4
3308	1.4
3285	1.4
3288	1.3
3461	1.3
3314	1.3
3432	1.3
3308	1.3
3303	1.3
3271	1.3
3200	1.3
3308	1.3
3426	1.3
3302	1.3
3254	1.3
3454	1.3
3310	1.3
3407	1.2
3299	1.2
3293	1.2
3414	1.2
3291	1.2
3317	1.2
3419	1.2
3307	1.2
3308	1.2
3294	1.2
3290	1.2
3446	1.2
3379	1.2
3298	1.2
3425	1.2
3278	1.2
3427	1.2
3255	1.2
3305	1.2
3291	1.2
3434	1.2
3310	1.2
3326	1.1
3291	1.1
3431	1.1
3304	1.1
3294	1.1
3306	1.1
3297	1.1
3434	1.1
3298	1.1
3423	1.1
3435	1.1
3273	1.1
3313	1.1
3287	1.1
3433	1.1
3422	1.1
3413	1
3452	1
3301	1
3298	1
3280	1
3416	1
3416	1
3323	1
3313	1
3326	1
3309	1
3291	0.9
3307	0.9
3315	0.9
3317	0.9
3419	0.9
3284	0.9
3307	0.9
3270	0.9
3466	0.9
3304	0.9
3314	0.9
3322	0.9
3293	0.9
3306	0.9
3310	0.9
3346	0.9
3435	0.9
3379	0.9
3262	0.8
3472	0.8
3282	0.8
3285	0.8
3431	0.8
3411	0.8
3319	0.8
3411	0.8
3314	0.8
3323	0.8
3286	0.8
3266	0.8
3462	0.8
3199	0.8
3308	0.8
3295	0.8
3412	0.8
3388	0.8
3323	0.8
3427	0.8
3303	0.7
2925	0.7
3308	0.7
3302	0.7
3444	0.7
3310	0.7
3297	0.7
3311	0.7
3284	0.7
3455	0.7
3455	0.7
3275	0.7
3445	0.7
3294	0.7
3416	0.7
3484	0.7
3432	0.6
3302	0.6
3466	0.6
3337	0.6
3426	0.6
3299	0.6
3325	0.6
3313	0.6
3404	0.6
3292	0.6
3302	0.6
3415	0.6
3292	0.6
3315	0.6
3468	0.6
3298	0.6
3416	0.5
3310	0.5
3316	0.5
3406	0.5
3287	0.5
3406	0.5
3290	0.5
3303	0.5
3332	0.5
3288	0.5
3437	0.5
3288	0.5
3317	0.5
3414	0.5
3438	0.5
3293	0.5
3269	0.4
3323	0.4
3310	0.4
3276	0.4
3467	0.4
3464	0.4
3391	0.4
3325	0.4
3436	0.4
3310	0.4
3309	0.4
3450	0.4
3406	0.4
3281	0.4
3309	0.4
3306	0.4
3314	0.4
3467	0.4
3292	0.4
3448	0.4
3428	0.4
3286	0.3
3431	0.3
3223	0.3
3432	0.3
2930	0.3
3245	0.3
3245	0.3
3417	0.3
3316	0.3
2937	0.3
3312	0.3
3397	0.3
3247	0.3
3650	0.3
3259	0.3
3286	0.3
3318	0.3
3309	0.3
3427	0.3
3281	0.3
3428	0.2
3308	0.2
3323	0.2
3406	0.2
3275	0.2
3406	0.2
3428	0.2
3267	0.2
3308	0.2
3291	0.2
3304	0.2
2947	0.2
3296	0.2
3323	0.2
3676	0.2
3055	0.2
3306	0.2
3285	0.2
3419	0.2
3425	0.2
3426	0.1
3302	0.1
3331	0.1
3249	0.1
3456	0.1
3457	0.1
3288	0.1
3415	0.1
3427	0.1
3410	0.1
3220	0.1
3431	0.1
3295	0.1
2925	0.1
3326	0.1
3431	0
3269	0
3318	0
3311	0
3380	0
3296	0
3428	0
3276	0
3306	0
3408	0
3286	0
3433	0
3600	0
3308	0
3266	0
3388	0
3339	0
3291	0
3615	0
3314	0
3275	0
3379	0
3432	0
3320	0
2932	0
3254	0
3283	-0.1
3658	-0.1
3404	-0.1
3323	-0.1
3430	-0.1
3622	-0.1
3415	-0.1
3325	-0.1
3412	-0.1
3220	-0.1
3668	-0.1
3309	-0.1
3606	-0.2
3314	-0.2
3242	-0.2
3238	-0.2
3285	-0.2
3315	-0.2
3303	-0.2
3302	-0.2
3307	-0.2
3310	-0.2
3419	-0.2
3281	-0.2
2926	-0.2
3288	-0.2
3303	-0.2
3291	-0.2
3314	-0.3
3310	-0.3
3638	-0.3
3317	-0.3
3656	-0.3
3288	-0.3
3319	-0.3
3312	-0.3
3611	-0.3
3291	-0.3
3293	-0.3
3436	-0.3
3311	-0.3
3316	-0.3
3314	-0.3
3412	-0.4
3583	-0.4
3436	-0.4
3308	-0.4
3271	-0.4
3314	-0.4
3597	-0.4
3307	-0.4
3374	-0.4
3237	-0.4
3433	-0.4
3318	-0.4
3315	-0.4
3312	-0.4
3271	-0.4
3415	-0.4
3296	-0.4
3315	-0.5
3267	-0.5
3231	-0.5
3298	-0.5
3391	-0.5
3602	-0.5
3451	-0.5
3294	-0.5
2931	-0.5
3407	-0.5
3660	-0.5
3295	-0.5
3439	-0.5
3316	-0.6
3274	-0.6
2924	-0.6
3590	-0.6
3658	-0.6
3315	-0.6
3447	-0.6
3620	-0.6
3303	-0.6
3230	-0.6
3313	-0.6
3426	-0.6
2862	-0.7
3309	-0.7
3444	-0.7
3290	-0.7
3281	-0.7
3655	-0.7
3312	-0.7
3597	-0.7
3297	-0.7
3432	-0.7
3312	-0.7
3256	-0.7
3454	-0.7
3399	-0.7
3296	-0.7
3306	-0.7
3604	-0.8
3273	-0.8
3283	-0.8
3656	-0.8
3616	-0.8
3316	-0.8
3329	-0.8
3335	-0.8
3415	-0.8
3288	-0.8
2917	-0.8
3641	-0.8
3265	-0.8
3295	-0.8
3399	-0.8
3609	-0.8
3301	-0.8
3284	-0.8
3439	-0.8
3235	-0.8
3294	-0.8
3317	-0.8
3648	-0.8
3392	-0.8
3281	-0.8
3403	-0.9
3290	-0.9
3614	-0.9
3234	-0.9
3280	-0.9
3305	-0.9
3573	-0.9
3438	-0.9
3299	-0.9
3595	-0.9
3314	-0.9
3247	-0.9
3110	-1
3281	-1
3293	-1
3436	-1
3436	-1
3298	-1
3292	-1
3308	-1
3438	-1
3300	-1
2924	-1
3409	-1
3621	-1
3314	-1
3243	-1
3312	-1
3603	-1
2832	-1
3583	-1
2951	-1
3601	-1
3282	-1
3305	-1
3278	-1
3309	-1.1
3631	-1.1
3312	-1.1
3228	-1.1
3315	-1.1
3308	-1.1
3288	-1.1
3236	-1.1
2924	-1.1
3296	-1.1
3303	-1.1
3583	-1.1
3256	-1.1
3618	-1.1
3556	-1.2
3591	-1.2
3246	-1.2
3458	-1.2
3622	-1.2
3459	-1.2
3319	-1.2
3434	-1.2
3585	-1.2
3307	-1.2
3657	-1.2
3318	-1.2
3250	-1.2
3592	-1.2
3287	-1.2
3446	-1.2
3313	-1.3
3620	-1.3
3634	-1.3
3269	-1.3
3221	-1.3
3606	-1.3
3275	-1.3
3568	-1.3
3310	-1.3
3436	-1.3
3312	-1.3
3244	-1.3
3237	-1.3
3230	-1.3
3582	-1.3
3587	-1.3
3666	-1.3
3247	-1.3
3308	-1.4
3276	-1.4
3229	-1.4
3269	-1.4
3287	-1.4
3286	-1.4
3582	-1.4
2929	-1.4
3577	-1.4
3449	-1.4
3570	-1.4
3315	-1.4
3606	-1.4
3603	-1.4
3640	-1.4
3608	-1.4
3265	-1.4
3288	-1.4
3305	-1.4
3309	-1.4
3297	-1.4
3316	-1.4
3577	-1.4
3603	-1.4
3300	-1.5
3620	-1.5
3597	-1.5
3279	-1.5
3297	-1.5
3311	-1.5
3608	-1.5
3613	-1.5
3200	-1.5
3635	-1.5
3296	-1.5
3593	-1.5
3627	-1.5
3623	-1.5
3317	-1.5
3425	-1.6
3606	-1.6
3315	-1.6
3236	-1.6
3241	-1.6
3631	-1.6
3251	-1.6
3593	-1.6
3310	-1.6
3276	-1.6
3271	-1.6
3265	-1.6
3366	-1.6
3265	-1.6
3222	-1.6
3319	-1.6
3313	-1.6
2944	-1.7
3233	-1.7
3621	-1.7
3300	-1.7
3575	-1.7
3310	-1.7
3639	-1.7
3593	-1.7
3265	-1.7
3637	-1.7
2919	-1.7
3607	-1.7
3603	-1.7
3300	-1.8
3589	-1.8
3308	-1.8
3265	-1.8
3426	-1.8
3276	-1.8
3459	-1.8
3296	-1.8
3627	-1.8
3303	-1.8
3238	-1.8
3616	-1.9
3252	-1.9
3647	-1.9
3323	-1.9
3297	-1.9
3307	-1.9
3288	-1.9
3252	-1.9
3644	-1.9
3302	-1.9
3604	-1.9
3236	-1.9
3318	-1.9
3226	-1.9
3575	-1.9
3272	-1.9
3646	-1.9
3292	-2
3302	-2
3574	-2
3620	-2
3071	-2
3307	-2
3324	-2
3642	-2
3425	-2
3612	-2
3642	-2
3573	-2
3319	-2
3279	-2
3317	-2
3629	-2
3293	-2.1
3307	-2.1
3245	-2.1
3240	-2.1
3231	-2.1
2974	-2.1
3239	-2.1
2925	-2.1
3275	-2.1
3636	-2.1
3640	-2.1
3246	-2.1
3243	-2.2
3236	-2.2
3259	-2.2
3432	-2.2
2976	-2.2
3301	-2.2
3315	-2.2
2924	-2.3
3243	-2.3
3312	-2.3
3254	-2.3
3238	-2.3
3269	-2.3
3596	-2.3
3307	-2.3
3313	-2.4
3313	-2.4
3281	-2.4
3447	-2.4
3548	-2.4
3288	-2.4
3285	-2.5
3340	-2.5
2833	-2.5
2910	-2.5
3235	-2.5
3334	-2.5
3248	-2.5
2925	-2.5
2928	-2.5
3304	-2.5
3335	-2.6
3606	-2.6
3249	-2.6
3276	-2.6
3214	-2.6
3292	-2.7
3442	-2.7
2887	-2.7
3221	-2.7
2910	-2.7
3259	-2.7
3273	-2.7
3271	-2.7
3306	-2.8
3432	-2.8
3254	-2.8
3243	-2.8
3560	-2.8
3223	-2.8
3220	-2.9
3246	-2.9
3605	-2.9
2943	-2.9
3256	-2.9
2936	-2.9
3223	-2.9
3293	-2.9
3418	-2.9
3432	-3
2909	-3
3714	-3
3222	-3
3291	-3
3256	-3
3795	-3
2978	-3
3291	-3.1
2936	-3.1
3218	-3.1
3249	-3.1
3565	-3.1
3176	-3.1
2927	-3.1
3563	-3.1
3301	-3.1
3294	-3.1
3232	-3.2
3307	-3.2
3257	-3.2
2924	-3.2
3208	-3.2
3252	-3.3
3266	-3.3
3269	-3.3
3621	-3.3
3315	-3.3
3580	-3.3
2929	-3.3
3228	-3.3
3316	-3.3
3633	-3.3
3304	-3.4
3307	-3.4
3681	-3.5
3412	-3.5
3315	-3.5
3226	-3.5
3223	-3.5
3404	-3.5
3287	-3.6
3229	-3.6
2858	-3.6
2913	-3.6
3230	-3.6
3242	-3.7
3247	-3.7
3245	-3.7
2929	-3.7
3251	-3.7
3309	-3.7
3446	-3.7
3294	-3.8
3280	-3.8
3242	-3.9
3227	-3.9
3462	-3.9
3239	-4
3288	-4.1
3246	-4.1
2928	-4.2
2923	-4.3
3161	-4.3
2928	-4.4
3261	-4.4
3267	-4.4
3242	-4.4
2830	-4.5
2924	-4.5
3251	-4.5
2934	-4.8
2933	-4.8
3309	-5
3236	-5
3213	-5
2837	-5.3
2936	-5.4
3410	-5.5
3245	-5.5
2921	-5.6
2822	-5.6
3248	-5.6
2839	-5.6
2934	-5.7
3265	-5.7
3297	-6
3261	-6
3259	-6.1
2920	-6.2
3299	-6.3
2928	-6.5
2938	-6.7
2819	-6.7
2932	-6.7
2935	-7.2
2933	-7.3
2913	-7.6
2917	-8
2905	-8.3

## Sheet: Supplementary table 4
Supplemental Table S4: Zircon Hf isotope reference material run during the course of this study
Spot No	180Hf/177Hf	2SE	176Yb/177Hf	2SE	176Lu/177Hf	2SE	176Hf/177Hf	2SE
Z_91500_1	1.88687	0.0004	0.01347	0.00014	0.0003641	1.8e-06	0.282246	8.4e-05
Z_91500_2	1.88697	0.00034	0.0131	0.00013	0.0003531	1.8e-06	0.282312	9.1e-05
Z_91500_3	1.88705	0.00036	0.01304	0.00016	0.000353	1.8e-06	0.282285	6.5e-05
Z_91500_4	1.88708	0.00032	0.01307	0.00015	0.0003521	1.6e-06	0.282249	8.6e-05
Z_91500_5	1.88701	0.00036	0.01333	0.00015	0.0003621	2.2e-06	0.282333	8.9e-05
Z_91500_6	1.88646	0.00038	0.013	0.00011	0.0003507	1.5e-06	0.282259	8.6e-05
Z_91500_7	1.88681	0.00024	0.01294	0.00018	0.0003555	2.1e-06	0.282247	7.7e-05
Z_91500_8	1.88697	0.00045	0.01339	0.00015	0.0003615	1.8e-06	0.28223	0.0001
Z_91500_9	1.88673	0.00032	0.01368	0.00015	0.0003679	1.3e-06	0.282186	8.6e-05
Z_91500_10	1.88671	0.00031	0.01382	0.00015	0.0003733	1.8e-06	0.282261	9.1e-05
Z_91500_11	1.88657	0.0004	0.0136	0.00013	0.0003661	1.5e-06	0.28225	0.00011
Z_91500_12	1.88695	0.00037	0.01378	0.00016	0.000373	1.7e-06	0.282382	8.4e-05
Z_91500_13	1.88636	0.00038	0.01346	0.00015	0.0003628	2.2e-06	0.282205	8.6e-05
Z_91500_1	1.8868	0.00015	0.015857	7.7e-05	0.00035509	6.1e-07	0.282265	3.6e-05
Z_91500_2	1.8868	0.00018	0.015498	6.3e-05	0.00035299	4.7e-07	0.282292	4.2e-05
Z_91500_3	1.8868	0.00016	0.015163	4.8e-05	0.00035175	3.9e-07	0.282297	3.2e-05
Z_91500_4	1.88686	0.00013	0.014622	5.5e-05	0.00034416	4.8e-07	0.282274	3.1e-05
Z_91500_5	1.88669	0.00016	0.014344	6.3e-05	0.00034409	4.2e-07	0.282318	3.2e-05
Z_91500_6	1.8868	0.00018	0.014155	5.7e-05	0.00034269	5.1e-07	0.282301	3.8e-05
Z_91500_7	1.88693	0.00016	0.013595	6.4e-05	0.00033496	4.9e-07	0.28229	3.4e-05
Z_91500_8	1.88669	0.00017	0.013643	6.1e-05	0.00033891	4.1e-07	0.282292	3.5e-05
Z_91500_9	1.88673	0.00017	0.013398	4e-05	0.00033705	4.6e-07	0.282291	2.8e-05
Z_91500_10	1.88685	0.00014	0.013343	5.4e-05	0.00033696	3.8e-07	0.282267	3.4e-05
Z_91500_11	1.88684	0.00012	0.013052	6.1e-05	0.00033404	5e-07	0.282272	3.6e-05
Z_91500_12	1.88682	0.00015	0.012731	6.7e-05	0.00032802	3.7e-07	0.282281	3.8e-05
Z_91500_13	1.88679	0.00013	0.012877	7.6e-05	0.00033088	5e-07	0.282273	3.1e-05
Z_91500_14	1.88693	0.00014	0.012615	6.3e-05	0.00032995	3.5e-07	0.282297	3e-05
Z_91500_15	1.88689	0.00013	0.0125	5.7e-05	0.00032797	4.2e-07	0.282311	3.4e-05
Z_91500_16	1.88684	0.00015	0.012428	4.2e-05	0.00032744	4.3e-07	0.282283	3.8e-05
Z_91500_1	1.88677	0.00018	0.014035	9.4e-05	0.00034735	4.2e-07	0.282292	4.1e-05
Z_91500_2	1.88692	0.00014	0.016933	6.3e-05	0.00042784	5.5e-07	0.282269	3.9e-05
Z_91500_3	1.88693	0.00016	0.015199	4.4e-05	0.00039152	7.9e-07	0.282284	4.1e-05
Z_91500_4	1.88678	0.00013	0.013635	2.2e-05	0.0003558	1.6e-06	0.282296	3.4e-05
Z_91500_5	1.88679	0.00014	0.01197	0.00012	0.0003179	1.9e-06	0.282273	3.2e-05
Z_91500_6	1.88683	0.00014	0.011875	3.3e-05	0.0003166	1.5e-06	0.282273	2.8e-05
Z_91500_7	1.88689	0.00015	0.012281	8e-05	0.00032807	6.5e-07	0.28226	3.5e-05
Z_91500_8	1.88687	0.00013	0.015699	6.6e-05	0.00042115	7.3e-07	0.282298	2.6e-05
Z_91500_9	1.88669	0.00018	0.013806	4.7e-05	0.00037426	6.7e-07	0.282286	3.5e-05
Z_91500_10	1.88695	0.00015	0.01199	7.1e-05	0.0003261	3.3e-06	0.282275	4.1e-05
Z_91500_11	1.88694	0.00015	0.012137	7e-05	0.00033152	3.9e-07	0.282277	3.6e-05
Z_91500_12	1.8869	0.00015	0.011337	8e-05	0.00031099	6.5e-07	0.282261	3.3e-05
Z_91500_13	1.88686	0.00015	0.011958	7.4e-05	0.00032859	4.6e-07	0.282289	3.6e-05
Z_91500_14	1.88674	0.00014	0.01057	8.2e-05	0.00029244	9e-07	0.282286	3.6e-05
Z_91500_15	1.8869	0.00014	0.011662	2.5e-05	0.0003234	1.9e-06	0.282285	3.1e-05
Z_91500_16	1.88681	0.00013	0.011337	6.2e-05	0.00031372	4.1e-07	0.282271	2.6e-05
Z_91500_17	1.88682	0.00012	0.011804	5.2e-05	0.00032759	4.7e-07	0.282273	4e-05
Z_91500_18	1.88684	0.00015	0.011823	5.1e-05	0.00032705	4.1e-07	0.282267	2.9e-05
Z_91500_19	1.88679	0.00016	0.011732	5.1e-05	0.00032666	4.8e-07	0.282307	2.7e-05
Z_91500_20	1.88681	0.00015	0.011626	5e-05	0.00032401	4.4e-07	0.28229	2.8e-05
Z_91500_1	1.88694	0.00025	0.011582	2.4e-05	0.000313	1.5e-06	0.282266	4.2e-05
Z_91500_2	1.88667	0.00023	0.01201	6e-05	0.0003274	9e-07	0.282268	5.4e-05
Z_91500_3	1.88716	0.00024	0.011898	3.2e-05	0.0003254	1.4e-06	0.282236	4.3e-05
Z_91500_4	1.88707	0.0002	0.011134	2.4e-05	0.0003062	1.5e-06	0.282248	6.1e-05
Z_91500_5	1.88695	0.00017	0.011379	4.4e-05	0.0003159	1.1e-06	0.282275	3.7e-05
Z_91500_6	1.88681	0.00017	0.011172	3.6e-05	0.0003117	1.1e-06	0.282305	4.9e-05
Z_91500_7	1.8867	0.00022	0.010408	3.1e-05	0.0002917	1.4e-06	0.282299	4.7e-05
Z_91500_8	1.88683	0.00019	0.01098	6.1e-05	0.00030903	7.4e-07	0.282327	4.4e-05
Z_91500_9	1.88671	0.00025	0.010711	8.7e-05	0.0003023	1e-06	0.282326	6.9e-05
Z_91500_10	1.88695	0.00024	0.011224	5.3e-05	0.00031547	7.4e-07	0.282327	5.2e-05
Z_91500_11	1.88701	0.00015	0.010724	2.8e-05	0.0003036	1e-06	0.282312	4.7e-05
Z_91500_12	1.88683	0.00023	0.010772	3.5e-05	0.00030289	7.9e-07	0.282358	4.1e-05
Z_91500_13	1.887	0.00021	0.010788	5.5e-05	0.00030547	7.5e-07	0.282273	5.1e-05
Z_91500_14	1.88659	0.00019	0.010419	7.2e-05	0.00029672	9.1e-07	0.282268	5.6e-05
Z_91500_1	1.8865	0.00019	0.010251	3.2e-05	0.00029243	6.6e-07	0.282285	5.4e-05
Z_91500_2	1.88666	0.00015	0.010527	3.4e-05	0.00030025	6.4e-07	0.28227	3.6e-05
Z_91500_3	1.88666	0.00022	0.010189	4.5e-05	0.00029048	5.2e-07	0.282267	5.8e-05
Z_91500_4	1.88632	0.0002	0.010324	3.4e-05	0.00029411	4.9e-07	0.282308	5.2e-05
Z_91500_5	1.88688	0.00022	0.010479	4.2e-05	0.00030003	5.8e-07	0.282221	4.7e-05
Z_91500_6	1.88625	0.00019	0.010311	3.4e-05	0.00029436	6.2e-07	0.282302	4.2e-05
Z_91500_7	1.88647	0.00014	0.010445	4.3e-05	0.00029808	4.7e-07	0.282225	3.6e-05
Z_91500_8	1.88638	0.00021	0.010451	4.3e-05	0.000299	5.6e-07	0.282252	4.1e-05
Z_91500_9	1.88652	0.00018	0.0103	4.1e-05	0.00029467	4.9e-07	0.282263	6.1e-05
Z_91500_10	1.88604	0.00025	0.010416	3.1e-05	0.00029727	6.8e-07	0.282281	4.3e-05
Z_91500_11	1.88643	0.00018	0.010252	5.1e-05	0.00029353	7.3e-07	0.282301	4.1e-05
Z_91500_12	1.88616	0.00022	0.010043	4.3e-05	0.00028864	5.5e-07	0.28234	7.3e-05
Z_91500_13	1.88623	0.0002	0.010511	5e-05	0.00030045	4.7e-07	0.282334	5.4e-05
Z_91500_14	1.88653	0.00018	0.010259	4.5e-05	0.00029359	5.8e-07	0.28231	5.9e-05
Z_91500_15	1.88612	0.00023	0.010151	3.4e-05	0.00029058	7.7e-07	0.282302	4e-05
Spot No	180Hf/177Hf	2SE	176Yb/177Hf	2SE	176Lu/177Hf	2SE	176Hf/177Hf	2SE
Z_GJ1_1	1.88694	0.00031	0.01058	0.00012	0.0002947	1.3e-06	0.281999	7.7e-05
Z_GJ1_2	1.88677	0.00026	0.01055	0.0001	0.0002926	1.3e-06	0.281939	5.8e-05
Z_GJ1_3	1.88687	0.00031	0.01051	0.00012	0.0002924	1.2e-06	0.282001	7.1e-05
Z_GJ1_4	1.88653	0.00035	0.010463	9.8e-05	0.000294	1.4e-06	0.282021	8.1e-05
Z_GJ1_5	1.88645	0.00038	0.010631	9.1e-05	0.000299	1.4e-06	0.282002	7.5e-05
Z_GJ1_6	1.88689	0.00026	0.01062	0.00013	0.0002979	1.4e-06	0.281964	9.1e-05
Z_GJ1_7	1.88686	0.00031	0.01066	0.00011	0.0002972	1.3e-06	0.282038	7.5e-05
Z_GJ1_8	1.88658	0.00025	0.01042	0.00012	0.0002932	1.3e-06	0.28195	7.5e-05
Z_GJ1_9	1.88685	0.00032	0.01065	0.00012	0.0002976	9.9e-07	0.282013	7.7e-05
Z_GJ1_10	1.88692	0.00033	0.01051	0.00012	0.0002928	1e-06	0.281958	7.4e-05
Z_GJ1_11	1.88625	0.00029	0.01037	0.00012	0.0002898	1.2e-06	0.282053	7.6e-05
Z_GJ1_12	1.88685	0.00031	0.01035	0.0001	0.0002909	1.2e-06	0.282017	7.4e-05
Z_GJ1_13	1.88664	0.00032	0.01038	0.00011	0.0002936	1.4e-06	0.28199	6.5e-05
Z_GJ1_1	1.88674	0.00013	0.015989	6e-05	0.0003646	4.2e-07	0.282042	3.9e-05
Z_GJ1_2	1.88678	0.00016	0.015368	5.9e-05	0.00036136	6.2e-07	0.282008	4.1e-05
Z_GJ1_3	1.88681	0.00012	0.015039	3.8e-05	0.0003594	6.1e-07	0.28199	2.6e-05
Z_GJ1_4	1.88679	0.00013	0.0147	4.7e-05	0.00035784	5.5e-07	0.281982	3.4e-05
Z_GJ1_5	1.88671	0.00014	0.014482	7.2e-05	0.00035709	4.3e-07	0.28202	3e-05
Z_GJ1_6	1.88685	0.00012	0.014154	6.7e-05	0.00035479	4.5e-07	0.282025	3.4e-05
Z_GJ1_7	1.88688	0.00012	0.013887	5.1e-05	0.00035237	3.2e-07	0.282008	3.3e-05
Z_GJ1_8	1.88687	0.00014	0.013753	5.5e-05	0.00035151	4.1e-07	0.281999	3.3e-05
Z_GJ1_9	1.88679	0.00013	0.01359	6.2e-05	0.00035018	3.8e-07	0.282016	3e-05
Z_GJ1_10	1.88689	0.00013	0.013373	5.3e-05	0.00034877	3.7e-07	0.282004	2.8e-05
Z_GJ1_11	1.88678	0.00016	0.013144	5.2e-05	0.00034712	4.5e-07	0.282008	3.5e-05
Z_GJ1_12	1.88685	0.00015	0.012929	6.1e-05	0.00034397	3.4e-07	0.281983	2.8e-05
Z_GJ1_13	1.88689	0.00015	0.0129	7e-05	0.00034389	3.6e-07	0.281997	2.7e-05
Z_GJ1_14	1.88678	0.00012	0.012669	6.6e-05	0.00034058	2.7e-07	0.282047	3.3e-05
Z_GJ1_15	1.88687	0.00014	0.012649	7e-05	0.00033746	3.3e-07	0.282013	3e-05
Z_GJ1_16	1.88685	0.00015	0.012396	4.4e-05	0.00033473	3.1e-07	0.282006	3.2e-05
Z_GJ1_1	1.88677	0.00011	0.013512	5e-05	0.00033969	3.6e-07	0.281987	3.1e-05
Z_GJ1_2	1.88684	0.00011	0.012787	4.5e-05	0.00033438	2.4e-07	0.282013	3.2e-05
Z_GJ1_3	1.88681	0.00014	0.012615	4.2e-05	0.00033216	3.4e-07	0.282009	2.6e-05
Z_GJ1_4	1.88662	0.00013	0.01242	5.2e-05	0.0003314	3.9e-07	0.282017	3.5e-05
Z_GJ1_5	1.88683	0.00012	0.012167	4.3e-05	0.00032784	3.5e-07	0.281982	3.7e-05
Z_GJ1_6	1.88686	0.00014	0.012075	4.1e-05	0.00032807	4.6e-07	0.281992	3.9e-05
Z_GJ1_7	1.88679	0.00015	0.01173	4.3e-05	0.00032005	4.1e-07	0.281985	3.3e-05
Z_GJ1_8	1.88672	0.00012	0.011849	4e-05	0.00032575	3.9e-07	0.28201	2.7e-05
Z_GJ1_9	1.88682	0.00012	0.011875	4.3e-05	0.00032756	4.1e-07	0.281984	3.2e-05
Z_GJ1_10	1.88676	0.00012	0.011682	4.8e-05	0.00032308	3.4e-07	0.281999	3.1e-05
Z_GJ1_11	1.88668	0.00011	0.011538	4.8e-05	0.00032061	3.4e-07	0.282017	2.7e-05
Z_GJ1_12	1.88686	0.00012	0.011358	5.1e-05	0.00031732	3.1e-07	0.282019	3.6e-05
Z_GJ1_13	1.88683	0.00013	0.011126	4.3e-05	0.00031207	2.8e-07	0.282008	3.1e-05
Z_GJ1_14	1.88691	0.00015	0.01144	4.8e-05	0.0003215	2.8e-07	0.282015	3.7e-05
Z_GJ1_15	1.88687	0.00013	0.011334	4.5e-05	0.00031917	2.9e-07	0.282019	3.9e-05
Z_GJ1_16	1.88679	0.00011	0.011238	4.9e-05	0.00031782	3.3e-07	0.282017	3.7e-05
Z_GJ1_17	1.88691	0.00015	0.011161	4.2e-05	0.00031532	2.9e-07	0.282015	3.1e-05
Z_GJ1_18	1.88673	0.00013	0.010947	4.7e-05	0.00030992	2.9e-07	0.282027	3.1e-05
Z_GJ1_19	1.88684	0.00014	0.011189	4.3e-05	0.00031882	3.4e-07	0.281989	3.5e-05
Z_GJ1_20	1.88681	0.00013	0.011199	4.1e-05	0.00031821	4.7e-07	0.28199	3.1e-05
Z_GJ1_1	1.88692	0.00017	0.011436	4.6e-05	0.0003212	7.9e-07	0.28199	5e-05
Z_GJ1_2	1.88692	0.0002	0.011525	3.7e-05	0.00032546	7.3e-07	0.281979	5.2e-05
Z_GJ1_3	1.88688	0.00016	0.011203	4.4e-05	0.0003193	8.6e-07	0.281958	4.5e-05
Z_GJ1_4	1.88681	0.00017	0.011131	3.1e-05	0.00031797	7.8e-07	0.282009	3.7e-05
Z_GJ1_5	1.88681	0.00018	0.011148	4.4e-05	0.0003206	8e-07	0.281992	3.8e-05
Z_GJ1_6	1.88701	0.00015	0.011198	3.4e-05	0.00032133	9e-07	0.282008	5.2e-05
Z_GJ1_7	1.88694	0.00018	0.010955	4.9e-05	0.00031576	8.3e-07	0.281998	5.6e-05
Z_GJ1_8	1.88675	0.00021	0.010981	4.9e-05	0.0003166	7.4e-07	0.281989	4.7e-05
Z_GJ1_9	1.88711	0.00024	0.010869	4.9e-05	0.00031452	7.2e-07	0.282017	4.3e-05
Z_GJ1_10	1.88693	0.00022	0.010804	4.6e-05	0.00031271	6.5e-07	0.281996	4.3e-05
Z_GJ1_11	1.88689	0.00015	0.010596	3e-05	0.00030784	7.6e-07	0.281982	5.4e-05
Z_GJ1_12	1.8871	0.00014	0.010751	5.2e-05	0.00031253	6.2e-07	0.282008	4.7e-05
Z_GJ1_13	1.88684	0.00014	0.010841	4.9e-05	0.00031498	5.8e-07	0.282031	4.5e-05
Z_GJ1_14	1.88692	0.00019	0.010495	3.9e-05	0.00030672	7.8e-07	0.281973	3.9e-05
Z_GJ1_1	1.88649	0.00019	0.010299	3.7e-05	0.00030144	5.4e-07	0.282032	4.8e-05
Z_GJ1_2	1.88664	0.00016	0.010316	3.5e-05	0.00030229	5.2e-07	0.281983	3.5e-05
Z_GJ1_3	1.88662	0.00016	0.010211	4.6e-05	0.00029955	4.5e-07	0.281993	4.9e-05
Z_GJ1_4	1.88662	0.00016	0.01004	3.1e-05	0.00029394	4.9e-07	0.281991	4e-05
Z_GJ1_5	1.88668	0.00019	0.010243	4.4e-05	0.00030146	4.4e-07	0.282006	3.8e-05
Z_GJ1_6	1.88662	0.00018	0.010147	4.1e-05	0.00029765	5.4e-07	0.282011	4.1e-05
Z_GJ1_7	1.88639	0.00011	0.01025	3.9e-05	0.00030077	4.4e-07	0.281988	3.4e-05
Z_GJ1_8	1.8864	0.00016	0.010289	4e-05	0.00030184	4.6e-07	0.281998	3.4e-05
Z_GJ1_9	1.88647	0.0002	0.010284	3.6e-05	0.00030249	4e-07	0.282023	4.3e-05
Z_GJ1_10	1.88653	0.00015	0.01008	4.4e-05	0.00029595	4.4e-07	0.282031	4.8e-05
Z_GJ1_11	1.88627	0.00021	0.010126	4.1e-05	0.00029857	5.1e-07	0.281983	3.9e-05
Z_GJ1_12	1.88631	0.00021	0.010173	4.6e-05	0.00030004	4.8e-07	0.282029	3.9e-05
Z_GJ1_13	1.88589	0.00021	0.009865	5e-05	0.00029071	4.5e-07	0.282026	4.4e-05
Z_GJ1_14	1.88606	0.00021	0.010254	5.2e-05	0.00030107	5.9e-07	0.28201	4.6e-05
Z_GJ1_15	1.88621	0.00018	0.010227	4.1e-05	0.00030075	5.1e-07	0.282022	3.1e-05
Spot No	180Hf/177Hf	2SE	176Yb/177Hf	2SE	176Lu/177Hf	2SE	176Hf/177Hf	2SE
Z_FC1_1	1.88693	0.00013	0.0558	0.0027	0.001471	7.2e-05	0.282202	3e-05
Z_FC1_2	1.88691	0.00012	0.0526	0.0018	0.001368	4.5e-05	0.282122	3.2e-05
Z_FC1_3	1.88679	0.00016	0.0414	0.0024	0.00109	6e-05	0.282203	3.3e-05
Z_FC1_4	1.88688	0.00011	0.0478	0.00057	0.001227	1.3e-05	0.282144	3.1e-05
Z_FC1_5	1.88663	0.00011	0.04884	0.0007	0.00125	1.7e-05	0.282103	3.6e-05
Z_FC1_6	1.88682	0.00019	0.0392	0.0032	0.001024	8.1e-05	0.282145	6.8e-05
FC1 - 10	1.88677	0.0001	0.0235	0.0016	0.00061	2.9e-05	0.282152	4.5e-05
FC1 - 7	1.88674	8.9e-05	0.0205	0.00028	0.0005424	3e-06	0.282152	3.9e-05
FC1 - 8	1.88676	8.8e-05	0.05141	0.00019	0.001289	2.1e-05	0.282168	4.3e-05
FC1 - 9	1.88675	0.00011	0.026	0.0014	0.000676	2.5e-05	0.28215	4.7e-05
FC1 - 1	1.88682	8.3e-05	0.07642	0.00078	0.001935	2.3e-06	0.282222	4.2e-05
FC1 - 2	1.88692	9.7e-05	0.07278	0.00074	0.0018185	4e-06	0.282204	4.2e-05
FC1 - 3	1.88681	9.5e-05	0.02394	0.0006	0.0006292	7.5e-06	0.282144	4e-05
FC1 - 4	1.88686	9.8e-05	0.0456	0.00068	0.0011358	3.7e-06	0.282138	4.2e-05
FC1 - 5	1.88688	0.00012	0.02553	0.00069	0.0007064	6.7e-06	0.282196	4.5e-05
FC1 - 6	1.88682	9.7e-05	0.04815	0.00059	0.0011916	2.7e-06	0.282137	4.3e-05
Z_FC1_12	1.8869	0.00012	0.02404	0.00024	0.00065426	9.8e-07	0.282156	3.4e-05
Z_FC1_1	1.88668	8.5e-05	0.05937	0.00049	0.001512	2.5e-05	0.282243	3.1e-05
Z_FC1_10	1.88679	7.4e-05	0.02747	0.0003	0.00074132	8.8e-07	0.282169	2.5e-05
Z_FC1_11	1.88683	8.5e-05	0.0262	0.00032	0.00070523	4e-07	0.282157	2.8e-05
Z_FC1_2	1.88673	9.4e-05	0.0785	0.0021	0.001967	2.8e-05	0.282269	2.5e-05
Z_FC1_3	1.88679	7.5e-05	0.0757	0.00037	0.00192	1.2e-05	0.282231	3.2e-05
Z_FC1_4	1.88681	9.9e-05	0.0705	0.00061	0.0017826	7.1e-06	0.282236	2.7e-05
Z_FC1_5	1.88676	8.7e-05	0.06641	0.00078	0.0016508	1.2e-06	0.282199	2.7e-05
Z_FC1_6	1.88688	0.0001	0.06848	0.00076	0.00169935	6.9e-07	0.282205	2.6e-05
Z_FC1_7	1.88684	0.00011	0.06472	0.00079	0.0015859	1.2e-06	0.282191	2.8e-05
Z_FC1_8	1.88686	7.8e-05	0.03895	0.00035	0.0009757	1.5e-06	0.282174	2.5e-05
Z_FC1_9	1.88676	9.7e-05	0.06036	0.00079	0.0014726	1.7e-06	0.282189	2.3e-05
Z_FC1_10	1.88686	8.8e-05	0.03659	0.00016	0.0009671	2e-06	0.282134	3.3e-05
Z_FC1_5	1.88683	7.9e-05	0.05123	0.00028	0.001347	3.8e-06	0.282152	2.7e-05
Z_FC1_6	1.88683	9.9e-05	0.02994	0.00021	0.0008055	5.4e-06	0.282141	2.8e-05
Z_FC1_7	1.88683	9.9e-05	0.035625	3.5e-05	0.0009481	3.2e-06	0.282152	3.6e-05
Z_FC1_8	1.88685	8.8e-05	0.05997	0.00014	0.0015219	7.1e-06	0.282143	2.9e-05
Z_FC1_9	1.88671	8.5e-05	0.0324	0.00013	0.0008563	5.2e-06	0.282132	3.1e-05
Z_FC1_1	1.88698	9e-05	0.0681	0.0024	0.001643	5.3e-05	0.282138	3.1e-05
Z_FC1_2	1.88668	9.7e-05	0.04953	0.00067	0.001294	1.2e-05	0.282175	3.1e-05
Z_FC1_3	1.88672	7.4e-05	0.04722	0.00046	0.001235	8.8e-06	0.282156	3e-05
Z_FC1_4	1.88675	0.00011	0.03341	0.00016	0.0008825	1.2e-06	0.282132	3.6e-05
Z_FC1_8	1.8868	0.00015	0.04745	0.00084	0.0011707	4.4e-06	0.282132	4.7e-05
Z_FC1_9	1.88683	0.00011	0.0418	0.00091	0.00103	7.4e-06	0.282126	4.3e-05
Z_FC1_1	1.88675	0.00015	0.02941	0.0003	0.0007318	2.9e-06	0.282147	4.2e-05
Z_FC1_2	1.88677	0.00012	0.03019	0.00023	0.0007621	3.1e-06	0.28217	4e-05
Z_FC1_3	1.8869	0.00015	0.03139	0.00034	0.0007934	1e-06	0.282144	4e-05
Z_FC1_4	1.88693	9.3e-05	0.0414	0.001	0.0010493	8.6e-06	0.282183	5.2e-05
Z_FC1_5	1.8868	0.00013	0.04075	0.0008	0.001046	3.8e-06	0.282161	4e-05
Z_FC1_6	1.88672	0.00014	0.04532	0.00048	0.0011393	3.1e-06	0.282194	4.2e-05
Z_FC1_7	1.88677	0.00014	0.03227	0.00022	0.000826	3.5e-06	0.282144	5.3e-05
Z_FC1_10	1.88691	0.00021	0.05316	0.00018	0.0013419	3.7e-06	0.282155	4.6e-05
Z_FC1_1	1.88687	0.00015	0.05743	0.00019	0.0013861	1.7e-06	0.282139	4.6e-05
Z_FC1_2	1.88671	0.00016	0.03704	0.0009	0.000936	2.4e-05	0.282141	4.7e-05
Z_FC1_3	1.88691	0.00013	0.037263	8.9e-05	0.0009547	4.3e-06	0.282149	5.3e-05
Z_FC1_4	1.88714	0.00017	0.07479	0.00012	0.0019088	6.9e-06	0.282197	5e-05
Z_FC1_5	1.88689	0.00013	0.08046	0.00073	0.002052	1.1e-05	0.282173	4.5e-05
Z_FC1_6	1.88693	0.00016	0.06298	0.00082	0.001598	1.4e-05	0.282202	4.6e-05
Z_FC1_7	1.88689	0.00019	0.06828	0.00041	0.0017335	6.5e-06	0.282136	5.2e-05
Z_FC1_8	1.88674	0.00017	0.06815	0.00035	0.0017352	5.9e-06	0.282178	5.3e-05
Z_FC1_9	1.88697	0.00013	0.05248	0.00023	0.0013263	1.2e-06	0.282115	5.3e-05
Z_FC1_10	1.88689	9.2e-05	0.05538	0.00014	0.0014183	1.9e-06	0.282158	2.4e-05
Z_FC1_5	1.88685	7.6e-05	0.03357	0.00066	0.000895	1.3e-05	0.28215	3e-05
Z_FC1_6	1.8868	0.00013	0.04951	0.00034	0.001284	1.3e-05	0.282145	3.3e-05
Z_FC1_7	1.88693	0.00011	0.05536	0.00055	0.0014111	7e-06	0.282144	2.9e-05
Z_FC1_8	1.8867	8.2e-05	0.05598	0.00045	0.0014306	4.6e-06	0.282147	2.5e-05
Z_FC1_9	1.88682	9.5e-05	0.05518	0.00028	0.0014049	1.1e-06	0.28214	2.5e-05
Z_FC1_1	1.88697	7.9e-05	0.05591	0.00018	0.001395	1.6e-06	0.282139	2.6e-05
Z_FC1_2	1.88676	7.7e-05	0.0545	0.00025	0.00137572	8.2e-07	0.282119	2.1e-05
Z_FC1_3	1.88692	0.00011	0.05521	0.00016	0.0013956	1.8e-06	0.282145	3e-05
Z_FC1_4	1.88689	0.0001	0.036531	9.3e-05	0.0009659	5.1e-06	0.282144	3.1e-05
Z_FC1_10	1.88674	0.00016	0.03161	0.00016	0.00086127	6.4e-07	0.282171	4.4e-05
Z_FC1_11	1.88679	0.00012	0.05839	0.00017	0.001507	1.9e-06	0.282138	4.3e-05
Z_FC1_12	1.88673	0.00013	0.05889	0.0001	0.0015089	3.3e-06	0.282119	4.6e-05
Z_FC1_13	1.88687	0.00015	0.06029	0.00014	0.0015465	2.9e-06	0.282123	4.3e-05
Z_FC1_14	1.88665	0.0001	0.058461	5.8e-05	0.0015008	5.4e-06	0.282124	3.9e-05
Z_FC1_15	1.88682	0.00015	0.0259	0.00036	0.000723	5.9e-06	0.282113	4.1e-05
Z_FC1_7	1.88684	0.00014	0.04501	0.00039	0.0011546	6.1e-06	0.282135	4.2e-05
Z_FC1_8	1.88656	0.00015	0.0496	0.001	0.001286	2.4e-05	0.282178	4.3e-05
Z_FC1_9	1.88672	0.00017	0.03621	0.00016	0.0009632	7.4e-06	0.282128	4.4e-05
Z_FC1_1	1.8868	0.00012	0.02739	0.00019	0.00073968	8.8e-07	0.282142	4.7e-05
Z_FC1_2	1.88685	0.00014	0.06952	0.00019	0.0017771	2.2e-06	0.282166	4.9e-05
Z_FC1_3	1.88658	0.00013	0.05613	0.00017	0.0014133	1.4e-06	0.282153	4.3e-05
Z_FC1_4	1.88676	0.00014	0.01774	0.00097	0.000473	2.3e-05	0.282154	5e-05
Z_FC1_5	1.8868	0.0002	0.1004	0.0024	0.002607	4.9e-05	0.282251	5.3e-05
Z_FC1_6	1.88679	0.00018	0.0521	0.0018	0.001349	4.6e-05	0.282131	4.9e-05
Z_FC1_10	1.88698	0.00017	0.0747	0.0036	0.00195	9e-05	0.282231	6.4e-05
Z_FC1_11	1.887	0.00017	0.0735	0.0034	0.001921	8.4e-05	0.282217	6.2e-05
Z_FC1_12	1.88692	0.00013	0.0752	0.0044	0.00198	0.00011	0.282207	6.5e-05
Z_FC1_1	1.88716	0.00017	0.0812	0.0052	0.00211	0.00013	0.282266	7.2e-05
Z_FC1_10	1.88672	0.00011	0.05173	0.00072	0.0012256	5.3e-06	0.282167	4e-05
Z_FC1_2	1.88707	0.00017	0.10674	0.00041	0.0026493	2e-06	0.282253	7e-05
Z_FC1_3	1.88704	0.00012	0.04991	0.00024	0.0012823	1e-06	0.282166	6.7e-05
Z_FC1_4	1.88705	0.00014	0.05136	0.0002	0.00132959	5.3e-07	0.282137	6.2e-05
Z_FC1_5	1.88711	0.00011	0.03213	0.00024	0.000868	1e-05	0.28212	5.7e-05
Z_FC1_6	1.88688	0.00013	0.0715	0.0015	0.001871	3.1e-05	0.282165	5.8e-05
Z_FC1_7	1.88709	0.00014	0.0645	0.0018	0.001706	3.8e-05	0.282185	6.5e-05
Z_FC1_8	1.88702	0.00014	0.044591	9.4e-05	0.0011653	6.3e-06	0.282135	6.4e-05
Z_FC1_9	1.88679	0.00011	0.05113	0.00077	0.0011844	3.7e-06	0.282162	2.8e-05
Z_FC1_9	1.88698	0.00016	0.05421	0.00049	0.0014029	7.6e-06	0.282106	6.2e-05
Z_FC1_1	1.8868	0.00012	0.04288	0.00057	0.0010106	3e-06	0.282169	3.3e-05
Z_FC1_10	1.88696	0.00012	0.05758	0.00034	0.0013746	6e-06	0.282168	3.7e-05
Z_FC1_2	1.88659	0.0001	0.06086	0.00065	0.0014128	1.9e-06	0.282217	3.4e-05
Z_FC1_3	1.8868	0.00013	0.02924	0.00043	0.0007147	2.8e-06	0.282147	3.5e-05
Z_FC1_4	1.88665	0.0001	0.03535	0.00038	0.00083004	9.1e-07	0.282169	4.1e-05
Z_FC1_5	1.88678	0.00014	0.0381	0.00052	0.0008859	1.1e-06	0.282156	3.7e-05
Z_FC1_6	1.88678	0.00013	0.05613	0.0005	0.0013275	1.4e-06	0.282154	3.5e-05
Z_FC1_7	1.88669	0.00011	0.05504	0.00062	0.0012924	1.2e-06	0.282165	3.1e-05
Z_FC1_8	1.88691	0.00012	0.04733	0.00088	0.0011162	8e-06	0.282155	3.2e-05
Z_FC1_1	1.88688	0.00013	0.1101	0.0029	0.002359	3.8e-05	0.282196	3.5e-05
Z_FC1_2	1.88687	8.9e-05	0.05446	0.00068	0.0012	2.6e-06	0.282167	3.9e-05
Z_FC1_3	1.8869	9.8e-05	0.0573	0.0013	0.00127	4.1e-05	0.282126	3.7e-05
Z_FC1_4	1.88679	0.0001	0.0866	0.0021	0.002027	2.9e-05	0.282233	3.5e-05
Z_FC1_5	1.88682	0.0001	0.07261	0.00077	0.0016333	4e-06	0.282114	3.6e-05
Z_FC1_6	1.88683	0.00015	0.07219	0.00082	0.0016306	2.7e-06	0.282111	4.1e-05
Z_FC1_7	1.88684	0.00014	0.05604	0.00043	0.0012529	5.1e-06	0.282144	2.7e-05
Z_FC1_8	1.88679	0.00013	0.05498	0.00045	0.0012522	3e-06	0.282131	5.2e-05
Z_FC1_9	1.88681	0.00012	0.03502	0.00053	0.000815	2.2e-05	0.282147	5.2e-05

## Sheet: Supplementary table 5
Supplemental Table S5; Compilation of published zircon oxygen isotope data (inherited and magmatic grains) from Pilbara Craton																			LOWESS FIT TO DATA
Geochron ID	Analysis ID	Dlong	Dlat	Rock type	Unit	18O/16O	1 sigma error	Delta 18O	1 sigma error	16OH/16O	1 sigma error	Interpretation	Age (Ma)	1 sigma error (Ma)	Discordance (%)	Reference (oxygen result)	Reference (age result)		Age (Ma)	Delta 18O	LOESS	Residual	2.5 percentile	97.5 percentile
195892	195892-18@1	-22.880616989333845	117.10054248159602	rhyodacite	fine-grained, altered rhyodacite	0.0020184	5e-07	6.56	0.23	0.0010501	1.1e-06	I	2436	34	-0.3	Geological Survey of Western Australia, 2021, Zircon oxygen isotope map of Western Australia: Geological Survey of Western Australia, digital data layer, <https://www.dmirs.wa.gov.au/geoview>	Wingate, MTD, Lu, Y, Kirkland, CL and Johnson, SP 2018, 195892: rhyodacite, Woongarra Pool; Geochronology Record 1453: Geological Survey of Western Australia, 4p.		2436	6.56	6.85447	-0.294471	6.55381	7.18789
195892	195892-25@1	-22.880616989333845	117.10054248159602	rhyodacite	fine-grained, altered rhyodacite	0.0020192	6e-07	7	0.3	0.0010715	1.7e-06	I	2436	9	0.2	Geological Survey of Western Australia, 2021, Zircon oxygen isotope map of Western Australia: Geological Survey of Western Australia, digital data layer, <https://www.dmirs.wa.gov.au/geoview>	Wingate, MTD, Lu, Y, Kirkland, CL and Johnson, SP 2018, 195892: rhyodacite, Woongarra Pool; Geochronology Record 1453: Geological Survey of Western Australia, 4p.		2436	7	6.85447	0.145529	6.55381	7.18789
195892	195892-21@1	-22.880616989333845	117.10054248159602	rhyodacite	fine-grained, altered rhyodacite	0.0020184	6e-07	6.6	0.29	0.0011117	1.4e-06	I	2438	8	0.8	Geological Survey of Western Australia, 2021, Zircon oxygen isotope map of Western Australia: Geological Survey of Western Australia, digital data layer, <https://www.dmirs.wa.gov.au/geoview>	Wingate, MTD, Lu, Y, Kirkland, CL and Johnson, SP 2018, 195892: rhyodacite, Woongarra Pool; Geochronology Record 1453: Geological Survey of Western Australia, 4p.		2438	6.6	6.85419	-0.254191	6.55452	7.18617
195892	195892-17@1	-22.880616989333845	117.10054248159602	rhyodacite	fine-grained, altered rhyodacite	0.0020192	5e-07	7	0.24	0.0010686	2.14e-05	I	2442	9	-0.2	Geological Survey of Western Australia, 2021, Zircon oxygen isotope map of Western Australia: Geological Survey of Western Australia, digital data layer, <https://www.dmirs.wa.gov.au/geoview>	Wingate, MTD, Lu, Y, Kirkland, CL and Johnson, SP 2018, 195892: rhyodacite, Woongarra Pool; Geochronology Record 1453: Geological Survey of Western Australia, 4p.		2442	7	6.85363	0.146373	6.55595	7.18322
195892	195892-1@1	-22.880616989333845	117.10054248159602	rhyodacite	fine-grained, altered rhyodacite	0.0020185	5e-07	6.63	0.26	0.0010465	2e-06	I	2443	8	2.1	Geological Survey of Western Australia, 2021, Zircon oxygen isotope map of Western Australia: Geological Survey of Western Australia, digital data layer, <https://www.dmirs.wa.gov.au/geoview>	Wingate, MTD, Lu, Y, Kirkland, CL and Johnson, SP 2018, 195892: rhyodacite, Woongarra Pool; Geochronology Record 1453: Geological Survey of Western Australia, 4p.		2443	6.63	6.85349	-0.223485	6.5563	7.18248
195892	195892-15@1	-22.880616989333845	117.10054248159602	rhyodacite	fine-grained, altered rhyodacite	0.0020187	5e-07	6.75	0.26	0.0010268	1e-06	I	2445	9	0.3	Geological Survey of Western Australia, 2021, Zircon oxygen isotope map of Western Australia: Geological Survey of Western Australia, digital data layer, <https://www.dmirs.wa.gov.au/geoview>	Wingate, MTD, Lu, Y, Kirkland, CL and Johnson, SP 2018, 195892: rhyodacite, Woongarra Pool; Geochronology Record 1453: Geological Survey of Western Australia, 4p.		2445	6.75	6.8532	-0.103201	6.55774	7.18075
195892	195892-29@1	-22.880616989333845	117.10054248159602	rhyodacite	fine-grained, altered rhyodacite	0.0020188	5e-07	6.8	0.26	0.0010593	1.6e-06	I	2445	8	0	Geological Survey of Western Australia, 2021, Zircon oxygen isotope map of Western Australia: Geological Survey of Western Australia, digital data layer, <https://www.dmirs.wa.gov.au/geoview>	Wingate, MTD, Lu, Y, Kirkland, CL and Johnson, SP 2018, 195892: rhyodacite, Woongarra Pool; Geochronology Record 1453: Geological Survey of Western Australia, 4p.		2445	7.14	6.8532	0.286799	6.55774	7.18075
195892	195892-2@1	-22.880616989333845	117.10054248159602	rhyodacite	fine-grained, altered rhyodacite	0.0020195	4e-07	7.14	0.21	0.0011641	1.5e-06	I	2445	9	1.6	Geological Survey of Western Australia, 2021, Zircon oxygen isotope map of Western Australia: Geological Survey of Western Australia, digital data layer, <https://www.dmirs.wa.gov.au/geoview>	Wingate, MTD, Lu, Y, Kirkland, CL and Johnson, SP 2018, 195892: rhyodacite, Woongarra Pool; Geochronology Record 1453: Geological Survey of Western Australia, 4p.		2445	6.8	6.8532	-0.0532013	6.55774	7.18075
195892	195892-22@1	-22.880616989333845	117.10054248159602	rhyodacite	fine-grained, altered rhyodacite	0.0020188	5e-07	6.81	0.23	0.0011301	2.2e-06	I	2446	8	1.5	Geological Survey of Western Australia, 2021, Zircon oxygen isotope map of Western Australia: Geological Survey of Western Australia, digital data layer, <https://www.dmirs.wa.gov.au/geoview>	Wingate, MTD, Lu, Y, Kirkland, CL and Johnson, SP 2018, 195892: rhyodacite, Woongarra Pool; Geochronology Record 1453: Geological Survey of Western Australia, 4p.		2446	7.09	6.85306	0.236941	6.55858	7.17977
195892	195892-4@1	-22.880616989333845	117.10054248159602	rhyodacite	fine-grained, altered rhyodacite	0.0020194	4e-07	7.09	0.22	0.0010136	1.6e-06	I	2446	9	1.4	Geological Survey of Western Australia, 2021, Zircon oxygen isotope map of Western Australia: Geological Survey of Western Australia, digital data layer, <https://www.dmirs.wa.gov.au/geoview>	Wingate, MTD, Lu, Y, Kirkland, CL and Johnson, SP 2018, 195892: rhyodacite, Woongarra Pool; Geochronology Record 1453: Geological Survey of Western Australia, 4p.		2446	6.81	6.85306	-0.0430588	6.55858	7.17977
195892	195892-7@1	-22.880616989333845	117.10054248159602	rhyodacite	fine-grained, altered rhyodacite	0.0020188	4e-07	6.77	0.22	0.0011567	1.5e-06	I	2448	9	0.5	Geological Survey of Western Australia, 2021, Zircon oxygen isotope map of Western Australia: Geological Survey of Western Australia, digital data layer, <https://www.dmirs.wa.gov.au/geoview>	Wingate, MTD, Lu, Y, Kirkland, CL and Johnson, SP 2018, 195892: rhyodacite, Woongarra Pool; Geochronology Record 1453: Geological Survey of Western Australia, 4p.		2448	6.77	6.85277	-0.082773	6.56025	7.17847
195892	195892-20@1	-22.880616989333845	117.10054248159602	rhyodacite	fine-grained, altered rhyodacite	0.0020188	6e-07	6.77	0.28	0.0011283	2.1e-06	I	2449	8	2.1	Geological Survey of Western Australia, 2021, Zircon oxygen isotope map of Western Australia: Geological Survey of Western Australia, digital data layer, <https://www.dmirs.wa.gov.au/geoview>	Wingate, MTD, Lu, Y, Kirkland, CL and Johnson, SP 2018, 195892: rhyodacite, Woongarra Pool; Geochronology Record 1453: Geological Survey of Western Australia, 4p.		2449	6.77	6.85263	-0.0826296	6.56108	7.17758
195892	195892-27@1	-22.880616989333845	117.10054248159602	rhyodacite	fine-grained, altered rhyodacite	0.0020193	6e-07	7.04	0.28	0.0011215	1.4e-06	I	2452	8	2.5	Geological Survey of Western Australia, 2021, Zircon oxygen isotope map of Western Australia: Geological Survey of Western Australia, digital data layer, <https://www.dmirs.wa.gov.au/geoview>	Wingate, MTD, Lu, Y, Kirkland, CL and Johnson, SP 2018, 195892: rhyodacite, Woongarra Pool; Geochronology Record 1453: Geological Survey of Western Australia, 4p.		2452	7.04	6.8522	0.187802	6.56347	7.17491
216546	216546-19-1	-23.59695598237924	119.78015346475154	metamonzogranite	fine- to medium-grained biotite metamonzogranite	0.0020199	4e-07	7.34	0.2	0.0004898	6e-07	I	2872	14	-1.2	Geological Survey of Western Australia, 2021, Zircon oxygen isotope map of Western Australia: Geological Survey of Western Australia, digital data layer, <https://www.dmirs.wa.gov.au/geoview>	Lu, Y, Wingate, MTD and Johnson, SP 2018, 216546: biotite metamonzogranite, Great Northern Highway; Geochronology Record 1520: Geological Survey of Western Australia, 4p.		2872	7.34	7.03003	0.309965	6.83945	7.27145
195891	195891_3@1	-22.681066394462885	116.45038841699933	metatonalite	medium-grained, foliated, altered metatonalite	0.0020187	6e-07	6.74	0.29	0.0008939	2.2e-06	I	2876	15	0.6	Geological Survey of Western Australia, 2021, Zircon oxygen isotope map of Western Australia: Geological Survey of Western Australia, digital data layer, <https://www.dmirs.wa.gov.au/geoview>	Wingate, MTD, Lu, Y, Kirkland, CL and Johnson, SP 2018, 195891: altered metatonalite, 4 Mile Bore; Geochronology Record 1473: Geological Survey of Western Australia, 4p.		2876	6.74	6.99096	-0.25096	6.80604	7.22237
216546	216546-3-1	-23.59695598237924	119.78015346475154	metamonzogranite	fine- to medium-grained biotite metamonzogranite	0.002019	4e-07	6.89	0.21	0.0005677	6e-07	I	2877	11	0.9	Geological Survey of Western Australia, 2021, Zircon oxygen isotope map of Western Australia: Geological Survey of Western Australia, digital data layer, <https://www.dmirs.wa.gov.au/geoview>	Lu, Y, Wingate, MTD and Johnson, SP 2018, 216546: biotite metamonzogranite, Great Northern Highway; Geochronology Record 1520: Geological Survey of Western Australia, 4p.		2877	6.89	6.98126	-0.0912575	6.79682	7.21093
195891	195891_2@1	-22.681066394462885	116.45038841699933	metatonalite	medium-grained, foliated, altered metatonalite	0.0020188	4e-07	6.77	0.21	0.0009963	2.1e-06	I	2879	14	1.4	Geological Survey of Western Australia, 2021, Zircon oxygen isotope map of Western Australia: Geological Survey of Western Australia, digital data layer, <https://www.dmirs.wa.gov.au/geoview>	Wingate, MTD, Lu, Y, Kirkland, CL and Johnson, SP 2018, 195891: altered metatonalite, 4 Mile Bore; Geochronology Record 1473: Geological Survey of Western Australia, 4p.		2879	6.77	6.96193	-0.191935	6.77804	7.18781
216546	216546-14-1	-23.59695598237924	119.78015346475154	metamonzogranite	fine- to medium-grained biotite metamonzogranite	0.0020194	4e-07	7.08	0.22	0.0005147	4e-07	I	2879	13	-0.8	Geological Survey of Western Australia, 2021, Zircon oxygen isotope map of Western Australia: Geological Survey of Western Australia, digital data layer, <https://www.dmirs.wa.gov.au/geoview>	Lu, Y, Wingate, MTD and Johnson, SP 2018, 216546: biotite metamonzogranite, Great Northern Highway; Geochronology Record 1520: Geological Survey of Western Australia, 4p.		2879	7.44	6.96193	0.478065	6.77804	7.18781
216546	216546-14-2	-23.59695598237924	119.78015346475154	metamonzogranite	fine- to medium-grained biotite metamonzogranite	0.0020201	5e-07	7.44	0.24	0.0005743	9e-07	I	2879	13	-0.8	Geological Survey of Western Australia, 2021, Zircon oxygen isotope map of Western Australia: Geological Survey of Western Australia, digital data layer, <https://www.dmirs.wa.gov.au/geoview>	Lu, Y, Wingate, MTD and Johnson, SP 2018, 216546: biotite metamonzogranite, Great Northern Highway; Geochronology Record 1520: Geological Survey of Western Australia, 4p.		2879	7.08	6.96193	0.118065	6.77804	7.18781
178230	178230-1-1	-22.745696714270057	120.62809188130446	granodiorite	undeformed biotite granodiorite	0.0020194	4e-07	7.09	0.18	0.0008272	3.9e-06	I	2880	12	1.7	Geological Survey of Western Australia, 2021, Zircon oxygen isotope map of Western Australia: Geological Survey of Western Australia, digital data layer, <https://www.dmirs.wa.gov.au/geoview>	Nelson, DR 2005, 178230: biotite granodiorite, Limestone Bore; Geochronology Record 574: Geological Survey of Western Australia, 4p.		2880	7.09	6.95232	0.137685	6.76869	7.17401
216546	216546-13-1	-23.59695598237924	119.78015346475154	metamonzogranite	fine- to medium-grained biotite metamonzogranite	0.0020194	4e-07	7.09	0.21	0.0005754	7e-07	I	2880	12	0.7	Geological Survey of Western Australia, 2021, Zircon oxygen isotope map of Western Australia: Geological Survey of Western Australia, digital data layer, <https://www.dmirs.wa.gov.au/geoview>	Lu, Y, Wingate, MTD and Johnson, SP 2018, 216546: biotite metamonzogranite, Great Northern Highway; Geochronology Record 1520: Geological Survey of Western Australia, 4p.		2880	7.09	6.95232	0.137685	6.76869	7.17401
216546	216546-18-1	-23.59695598237924	119.78015346475154	metamonzogranite	fine- to medium-grained biotite metamonzogranite	0.0020189	4e-07	6.83	0.21	0.0005786	1.7e-06	I	2884	11	1	Geological Survey of Western Australia, 2021, Zircon oxygen isotope map of Western Australia: Geological Survey of Western Australia, digital data layer, <https://www.dmirs.wa.gov.au/geoview>	Lu, Y, Wingate, MTD and Johnson, SP 2018, 216546: biotite metamonzogranite, Great Northern Highway; Geochronology Record 1520: Geological Survey of Western Australia, 4p.		2884	7	6.91412	0.08588	6.73286	7.11919
216546	216546-6-1	-23.59695598237924	119.78015346475154	metamonzogranite	fine- to medium-grained biotite metamonzogranite	0.0020192	4e-07	7	0.2	0.0006193	1e-06	I	2884	11	0	Geological Survey of Western Australia, 2021, Zircon oxygen isotope map of Western Australia: Geological Survey of Western Australia, digital data layer, <https://www.dmirs.wa.gov.au/geoview>	Lu, Y, Wingate, MTD and Johnson, SP 2018, 216546: biotite metamonzogranite, Great Northern Highway; Geochronology Record 1520: Geological Survey of Western Australia, 4p.		2884	6.83	6.91412	-0.08412	6.73286	7.11919
216546	216546-1-1	-23.59695598237924	119.78015346475154	metamonzogranite	fine- to medium-grained biotite metamonzogranite	0.0020196	4e-07	7.2	0.22	0.0005087	5e-07	I	2886	19	1.3	Geological Survey of Western Australia, 2021, Zircon oxygen isotope map of Western Australia: Geological Survey of Western Australia, digital data layer, <https://www.dmirs.wa.gov.au/geoview>	Lu, Y, Wingate, MTD and Johnson, SP 2018, 216546: biotite metamonzogranite, Great Northern Highway; Geochronology Record 1520: Geological Survey of Western Australia, 4p.		2886	7.2	6.8952	0.304804	6.71419	7.09305
195891	195891_24@1	-22.681066394462885	116.45038841699933	metatonalite	medium-grained, foliated, altered metatonalite	0.0020191	5e-07	6.92	0.26	0.0010268	2e-06	I	2888	49	-0.1	Geological Survey of Western Australia, 2021, Zircon oxygen isotope map of Western Australia: Geological Survey of Western Australia, digital data layer, <https://www.dmirs.wa.gov.au/geoview>	Wingate, MTD, Lu, Y, Kirkland, CL and Johnson, SP 2018, 195891: altered metatonalite, 4 Mile Bore; Geochronology Record 1473: Geological Survey of Western Australia, 4p.		2888	6.68	6.87639	-0.196392	6.69845	7.07195
178230	178230-18-1	-22.745696714270057	120.62809188130446	granodiorite	undeformed biotite granodiorite	0.0020181	4e-07	6.45	0.18	0.0009181	3.3e-06	I	2888	8	4.1	Geological Survey of Western Australia, 2021, Zircon oxygen isotope map of Western Australia: Geological Survey of Western Australia, digital data layer, <https://www.dmirs.wa.gov.au/geoview>	Nelson, DR 2005, 178230: biotite granodiorite, Limestone Bore; Geochronology Record 574: Geological Survey of Western Australia, 4p.		2888	5.89	6.87639	-0.986392	6.69845	7.07195
178230	178230-20-1	-22.745696714270057	120.62809188130446	granodiorite	undeformed biotite granodiorite	0.002017	3e-07	5.89	0.17	0.0010164	7.7e-06	I	2888	15	0.7	Geological Survey of Western Australia, 2021, Zircon oxygen isotope map of Western Australia: Geological Survey of Western Australia, digital data layer, <https://www.dmirs.wa.gov.au/geoview>	Nelson, DR 2005, 178230: biotite granodiorite, Limestone Bore; Geochronology Record 574: Geological Survey of Western Australia, 4p.		2888	6.45	6.87639	-0.426392	6.69845	7.07195
216546	216546-7-1	-23.59695598237924	119.78015346475154	metamonzogranite	fine- to medium-grained biotite metamonzogranite	0.0020186	4e-07	6.68	0.21	0.0005768	7e-07	I	2888	9	6.5	Geological Survey of Western Australia, 2021, Zircon oxygen isotope map of Western Australia: Geological Survey of Western Australia, digital data layer, <https://www.dmirs.wa.gov.au/geoview>	Lu, Y, Wingate, MTD and Johnson, SP 2018, 216546: biotite metamonzogranite, Great Northern Highway; Geochronology Record 1520: Geological Survey of Western Australia, 4p.		2888	6.92	6.87639	0.0436085	6.69845	7.07195
216546	216546-11-1	-23.59695598237924	119.78015346475154	metamonzogranite	fine- to medium-grained biotite metamonzogranite	0.0020195	4e-07	7.12	0.2	0.0006779	7e-07	I	2891	12	-3.1	Geological Survey of Western Australia, 2021, Zircon oxygen isotope map of Western Australia: Geological Survey of Western Australia, digital data layer, <https://www.dmirs.wa.gov.au/geoview>	Lu, Y, Wingate, MTD and Johnson, SP 2018, 216546: biotite metamonzogranite, Great Northern Highway; Geochronology Record 1520: Geological Survey of Western Australia, 4p.		2891	7.12	6.84841	0.271589	6.67499	7.03677
216546	216546-9-1	-23.59695598237924	119.78015346475154	metamonzogranite	fine- to medium-grained biotite metamonzogranite	0.0020186	5e-07	6.69	0.23	0.0005547	8e-07	I	2895	10	-0.1	Geological Survey of Western Australia, 2021, Zircon oxygen isotope map of Western Australia: Geological Survey of Western Australia, digital data layer, <https://www.dmirs.wa.gov.au/geoview>	Lu, Y, Wingate, MTD and Johnson, SP 2018, 216546: biotite metamonzogranite, Great Northern Highway; Geochronology Record 1520: Geological Survey of Western Australia, 4p.		2895	6.69	6.81154	-0.121542	6.64406	6.98916
195891	195891_13@1	-22.681066394462885	116.45038841699933	metatonalite	medium-grained, foliated, altered metatonalite	0.0020203	4e-07	7.54	0.18	0.0009988	2.6e-06	I	2896	14	0.9	Geological Survey of Western Australia, 2021, Zircon oxygen isotope map of Western Australia: Geological Survey of Western Australia, digital data layer, <https://www.dmirs.wa.gov.au/geoview>	Wingate, MTD, Lu, Y, Kirkland, CL and Johnson, SP 2018, 195891: altered metatonalite, 4 Mile Bore; Geochronology Record 1473: Geological Survey of Western Australia, 4p.		2896	7.54	6.8024	0.737596	6.63566	6.97665
195891	195891_14@1	-22.681066394462885	116.45038841699933	metatonalite	medium-grained, foliated, altered metatonalite	0.00202	4e-07	7.38	0.19	0.0009921	2.3e-06	I	2898	13	2.8	Geological Survey of Western Australia, 2021, Zircon oxygen isotope map of Western Australia: Geological Survey of Western Australia, digital data layer, <https://www.dmirs.wa.gov.au/geoview>	Wingate, MTD, Lu, Y, Kirkland, CL and Johnson, SP 2018, 195891: altered metatonalite, 4 Mile Bore; Geochronology Record 1473: Geological Survey of Western Australia, 4p.		2898	7.38	6.78423	0.595772	6.61784	6.95226
216546	216546-15-1	-23.59695598237924	119.78015346475154	metamonzogranite	fine- to medium-grained biotite metamonzogranite	0.0020194	4e-07	7.1	0.22	0.0005099	6e-07	I	2900	16	2.4	Geological Survey of Western Australia, 2021, Zircon oxygen isotope map of Western Australia: Geological Survey of Western Australia, digital data layer, <https://www.dmirs.wa.gov.au/geoview>	Lu, Y, Wingate, MTD and Johnson, SP 2018, 216546: biotite metamonzogranite, Great Northern Highway; Geochronology Record 1520: Geological Survey of Western Australia, 4p.		2900	7.1	6.76618	0.333816	6.59807	6.92974
195891	195891_1@1	-22.681066394462885	116.45038841699933	metatonalite	medium-grained, foliated, altered metatonalite	0.0020184	4e-07	6.59	0.18	0.0009813	3.3e-06	I	2902	11	6.2	Geological Survey of Western Australia, 2021, Zircon oxygen isotope map of Western Australia: Geological Survey of Western Australia, digital data layer, <https://www.dmirs.wa.gov.au/geoview>	Wingate, MTD, Lu, Y, Kirkland, CL and Johnson, SP 2018, 195891: altered metatonalite, 4 Mile Bore; Geochronology Record 1473: Geological Survey of Western Australia, 4p.		2902	6.59	6.74827	-0.158275	6.58205	6.90492
216546	216546-16-1	-23.59695598237924	119.78015346475154	metamonzogranite	fine- to medium-grained biotite metamonzogranite	0.0020196	5e-07	7.2	0.24	0.0005124	8e-07	I	2903	13	0.6	Geological Survey of Western Australia, 2021, Zircon oxygen isotope map of Western Australia: Geological Survey of Western Australia, digital data layer, <https://www.dmirs.wa.gov.au/geoview>	Lu, Y, Wingate, MTD and Johnson, SP 2018, 216546: biotite metamonzogranite, Great Northern Highway; Geochronology Record 1520: Geological Survey of Western Australia, 4p.		2903	6.7	6.73937	-0.0393705	6.57232	6.89206
216546	216546-10-1	-23.59695598237924	119.78015346475154	metamonzogranite	fine- to medium-grained biotite metamonzogranite	0.0020186	4e-07	6.7	0.21	0.0005858	1e-06	I	2903	11	1.8	Geological Survey of Western Australia, 2021, Zircon oxygen isotope map of Western Australia: Geological Survey of Western Australia, digital data layer, <https://www.dmirs.wa.gov.au/geoview>	Lu, Y, Wingate, MTD and Johnson, SP 2018, 216546: biotite metamonzogranite, Great Northern Highway; Geochronology Record 1520: Geological Survey of Western Australia, 4p.		2903	7.2	6.73937	0.460629	6.57232	6.89206
195891	195891_7@1	-22.681066394462885	116.45038841699933	metatonalite	medium-grained, foliated, altered metatonalite	0.0020187	5e-07	6.71	0.26	0.0009492	2e-06	I	2904	13	0.2	Geological Survey of Western Australia, 2021, Zircon oxygen isotope map of Western Australia: Geological Survey of Western Australia, digital data layer, <https://www.dmirs.wa.gov.au/geoview>	Wingate, MTD, Lu, Y, Kirkland, CL and Johnson, SP 2018, 195891: altered metatonalite, 4 Mile Bore; Geochronology Record 1473: Geological Survey of Western Australia, 4p.		2904	6.71	6.7305	-0.0205005	6.56263	6.88071
178230	178230-2-1	-22.745696714270057	120.62809188130446	granodiorite	undeformed biotite granodiorite	0.0020191	3e-07	6.92	0.17	0.0009017	3.8e-06	I	2904	18	1.9	Geological Survey of Western Australia, 2021, Zircon oxygen isotope map of Western Australia: Geological Survey of Western Australia, digital data layer, <https://www.dmirs.wa.gov.au/geoview>	Nelson, DR 2005, 178230: biotite granodiorite, Limestone Bore; Geochronology Record 574: Geological Survey of Western Australia, 4p.		2904	6.92	6.7305	0.189499	6.56263	6.88071
178230	178230-5-1	-22.745696714270057	120.62809188130446	granodiorite	undeformed biotite granodiorite	0.0020195	4e-07	7.12	0.19	0.0009286	3.8e-06	I	2906	6	2.4	Geological Survey of Western Australia, 2021, Zircon oxygen isotope map of Western Australia: Geological Survey of Western Australia, digital data layer, <https://www.dmirs.wa.gov.au/geoview>	Nelson, DR 2005, 178230: biotite granodiorite, Limestone Bore; Geochronology Record 574: Geological Survey of Western Australia, 4p.		2906	7.12	6.71286	0.407137	6.54337	6.86298
195891	195891_23@1	-22.681066394462885	116.45038841699933	metatonalite	medium-grained, foliated, altered metatonalite	0.0020193	5e-07	7.01	0.25	0.0010427	2.1e-06	I	2907	10	0	Geological Survey of Western Australia, 2021, Zircon oxygen isotope map of Western Australia: Geological Survey of Western Australia, digital data layer, <https://www.dmirs.wa.gov.au/geoview>	Wingate, MTD, Lu, Y, Kirkland, CL and Johnson, SP 2018, 195891: altered metatonalite, 4 Mile Bore; Geochronology Record 1473: Geological Survey of Western Australia, 4p.		2907	7.01	6.7041	0.305904	6.53381	6.85197
195891	195891_6@1	-22.681066394462885	116.45038841699933	metatonalite	medium-grained, foliated, altered metatonalite	0.0020185	6e-07	6.61	0.28	0.0009455	2e-06	I	2908	13	1.4	Geological Survey of Western Australia, 2021, Zircon oxygen isotope map of Western Australia: Geological Survey of Western Australia, digital data layer, <https://www.dmirs.wa.gov.au/geoview>	Wingate, MTD, Lu, Y, Kirkland, CL and Johnson, SP 2018, 195891: altered metatonalite, 4 Mile Bore; Geochronology Record 1473: Geological Survey of Western Australia, 4p.		2908	6.61	6.69536	-0.0853633	6.52428	6.84099
216546	216546-5-1	-23.59695598237924	119.78015346475154	metamonzogranite	fine- to medium-grained biotite metamonzogranite	0.0020198	4e-07	7.3	0.2	0.0005288	5e-07	I	2909	10	1.1	Geological Survey of Western Australia, 2021, Zircon oxygen isotope map of Western Australia: Geological Survey of Western Australia, digital data layer, <https://www.dmirs.wa.gov.au/geoview>	Lu, Y, Wingate, MTD and Johnson, SP 2018, 216546: biotite metamonzogranite, Great Northern Highway; Geochronology Record 1520: Geological Survey of Western Australia, 4p.		2909	7.3	6.68667	0.613335	6.51598	6.83111
178230	178230-3-1	-22.745696714270057	120.62809188130446	granodiorite	undeformed biotite granodiorite	0.0020185	4e-07	6.61	0.19	0.0008582	4.3e-06	I	2910	13	1.6	Geological Survey of Western Australia, 2021, Zircon oxygen isotope map of Western Australia: Geological Survey of Western Australia, digital data layer, <https://www.dmirs.wa.gov.au/geoview>	Nelson, DR 2005, 178230: biotite granodiorite, Limestone Bore; Geochronology Record 574: Geological Survey of Western Australia, 4p.		2910	6.61	6.678	-0.0680013	6.50868	6.8203
178231	178231-06-1	-22.75322692643503	120.62475020794058	monzogranite	porphyritic biotite monzogranite	0.002019	4e-07	6.87	0.19	0.0007523	3.9e-06	I	2912	14	0.2	Geological Survey of Western Australia, 2021, Zircon oxygen isotope map of Western Australia: Geological Survey of Western Australia, digital data layer, <https://www.dmirs.wa.gov.au/geoview>	Nelson, DR 2005, 178231: biotite monzogranite, Limestone Bore; Geochronology Record 575: Geological Survey of Western Australia, 4p.		2912	6.87	6.66078	0.209223	6.49149	6.799
216546	216546-2-1	-23.59695598237924	119.78015346475154	metamonzogranite	fine- to medium-grained biotite metamonzogranite	0.0020195	4e-07	7.14	0.22	0.0004984	4e-07	I	2913	19	3.3	Geological Survey of Western Australia, 2021, Zircon oxygen isotope map of Western Australia: Geological Survey of Western Australia, digital data layer, <https://www.dmirs.wa.gov.au/geoview>	Lu, Y, Wingate, MTD and Johnson, SP 2018, 216546: biotite metamonzogranite, Great Northern Highway; Geochronology Record 1520: Geological Survey of Western Australia, 4p.		2913	7.14	6.65222	0.487784	6.48268	6.78925
178231	178231-07-1	-22.75322692643503	120.62475020794058	monzogranite	porphyritic biotite monzogranite	0.0020179	4e-07	6.31	0.17	0.0007982	5.3e-06	I	2915	14	-0.9	Geological Survey of Western Australia, 2021, Zircon oxygen isotope map of Western Australia: Geological Survey of Western Australia, digital data layer, <https://www.dmirs.wa.gov.au/geoview>	Nelson, DR 2005, 178231: biotite monzogranite, Limestone Bore; Geochronology Record 575: Geological Survey of Western Australia, 4p.		2915	6.31	6.6352	-0.325197	6.46683	6.7674
216546	216546-8-1	-23.59695598237924	119.78015346475154	metamonzogranite	fine- to medium-grained biotite metamonzogranite	0.0020194	4e-07	7.1	0.21	0.0006306	8e-07	I	2920	11	0.6	Geological Survey of Western Australia, 2021, Zircon oxygen isotope map of Western Australia: Geological Survey of Western Australia, digital data layer, <https://www.dmirs.wa.gov.au/geoview>	Lu, Y, Wingate, MTD and Johnson, SP 2018, 216546: biotite metamonzogranite, Great Northern Highway; Geochronology Record 1520: Geological Survey of Western Australia, 4p.		2920	7.1	6.59324	0.50676	6.42494	6.71542
195891	195891_5@1	-22.681066394462885	116.45038841699933	metatonalite	medium-grained, foliated, altered metatonalite	0.0020186	4e-07	6.66	0.2	0.0010328	2.4e-06	I	2921	14	1.1	Geological Survey of Western Australia, 2021, Zircon oxygen isotope map of Western Australia: Geological Survey of Western Australia, digital data layer, <https://www.dmirs.wa.gov.au/geoview>	Wingate, MTD, Lu, Y, Kirkland, CL and Johnson, SP 2018, 195891: altered metatonalite, 4 Mile Bore; Geochronology Record 1473: Geological Survey of Western Australia, 4p.		2921	6.66	6.58495	0.0750515	6.41742	6.70695
160730	160730-1@1	-20.65327620206068	118.7054463895291	granodiorite	strongly foliated biotite granodiorite	0.0020166	6e-07	5.71	0.31	0.0007833	2.1e-06	I	2936	5	0.8	Geological Survey of Western Australia, 2021, Zircon oxygen isotope map of Western Australia: Geological Survey of Western Australia, digital data layer, <https://www.dmirs.wa.gov.au/geoview>	Nelson, DR 2001, 160730: foliated biotite granodiorite, Malindra Well; Geochronology Record 244: Geological Survey of Western Australia, 4p.		2936	5.71	6.46424	-0.754236	6.29633	6.57398
160730	160730-13@1	-20.65327620206068	118.7054463895291	granodiorite	strongly foliated biotite granodiorite	0.0020164	6e-07	5.59	0.28	0.0007855	4e-06	I	2939	6	1.6	Geological Survey of Western Australia, 2021, Zircon oxygen isotope map of Western Australia: Geological Survey of Western Australia, digital data layer, <https://www.dmirs.wa.gov.au/geoview>	Nelson, DR 2001, 160730: foliated biotite granodiorite, Malindra Well; Geochronology Record 244: Geological Survey of Western Australia, 4p.		2939	5.59	6.44082	-0.850819	6.26919	6.5469
160730	160730-14@1	-20.65327620206068	118.7054463895291	granodiorite	strongly foliated biotite granodiorite	0.0020179	6e-07	6.33	0.32	0.0011037	6e-07	I	2939	3	1.1	Geological Survey of Western Australia, 2021, Zircon oxygen isotope map of Western Australia: Geological Survey of Western Australia, digital data layer, <https://www.dmirs.wa.gov.au/geoview>	Nelson, DR 2001, 160730: foliated biotite granodiorite, Malindra Well; Geochronology Record 244: Geological Survey of Western Australia, 4p.		2939	6.33	6.44082	-0.110819	6.26919	6.5469
160730	160730-3@1	-20.65327620206068	118.7054463895291	granodiorite	strongly foliated biotite granodiorite	0.0020171	6e-07	5.91	0.28	0.0008589	1.4e-06	I	2944	3	1.3	Geological Survey of Western Australia, 2021, Zircon oxygen isotope map of Western Australia: Geological Survey of Western Australia, digital data layer, <https://www.dmirs.wa.gov.au/geoview>	Nelson, DR 2001, 160730: foliated biotite granodiorite, Malindra Well; Geochronology Record 244: Geological Survey of Western Australia, 4p.		2944	5.91	6.40221	-0.492207	6.22753	6.50584
160730	160730-4@1	-20.65327620206068	118.7054463895291	granodiorite	strongly foliated biotite granodiorite	0.002018	6e-07	6.38	0.3	0.0013201	4.1e-06	I	2945	4	2.5	Geological Survey of Western Australia, 2021, Zircon oxygen isotope map of Western Australia: Geological Survey of Western Australia, digital data layer, <https://www.dmirs.wa.gov.au/geoview>	Nelson, DR 2001, 160730: foliated biotite granodiorite, Malindra Well; Geochronology Record 244: Geological Survey of Western Australia, 4p.		2945	6.38	6.39454	-0.0145383	6.21926	6.49723
160730	160730-12@1	-20.65327620206068	118.7054463895291	granodiorite	strongly foliated biotite granodiorite	0.0020168	6e-07	5.78	0.31	0.0008059	1.3e-06	I	2946	4	-3.3	Geological Survey of Western Australia, 2021, Zircon oxygen isotope map of Western Australia: Geological Survey of Western Australia, digital data layer, <https://www.dmirs.wa.gov.au/geoview>	Nelson, DR 2001, 160730: foliated biotite granodiorite, Malindra Well; Geochronology Record 244: Geological Survey of Western Australia, 4p.		2946	5.78	6.38688	-0.606885	6.21215	6.48882
160730	160730-7@1	-20.65327620206068	118.7054463895291	granodiorite	strongly foliated biotite granodiorite	0.0020167	6e-07	5.75	0.28	0.0014598	5.9e-06	I	2948	3	1.5	Geological Survey of Western Australia, 2021, Zircon oxygen isotope map of Western Australia: Geological Survey of Western Australia, digital data layer, <https://www.dmirs.wa.gov.au/geoview>	Nelson, DR 2001, 160730: foliated biotite granodiorite, Malindra Well; Geochronology Record 244: Geological Survey of Western Australia, 4p.		2948	5.76	6.37162	-0.61162	6.19592	6.47249
160730	160730-5@1	-20.65327620206068	118.7054463895291	granodiorite	strongly foliated biotite granodiorite	0.0020168	5e-07	5.76	0.27	0.001076	4.1e-06	I	2948	4	1.2	Geological Survey of Western Australia, 2021, Zircon oxygen isotope map of Western Australia: Geological Survey of Western Australia, digital data layer, <https://www.dmirs.wa.gov.au/geoview>	Nelson, DR 2001, 160730: foliated biotite granodiorite, Malindra Well; Geochronology Record 244: Geological Survey of Western Australia, 4p.		2948	5.75	6.37162	-0.62162	6.19592	6.47249
160730	160730-16@1	-20.65327620206068	118.7054463895291	granodiorite	strongly foliated biotite granodiorite	0.002017	6e-07	5.9	0.28	0.0009574	3.2e-06	I	2949	4	-0.1	Geological Survey of Western Australia, 2021, Zircon oxygen isotope map of Western Australia: Geological Survey of Western Australia, digital data layer, <https://www.dmirs.wa.gov.au/geoview>	Nelson, DR 2001, 160730: foliated biotite granodiorite, Malindra Well; Geochronology Record 244: Geological Survey of Western Australia, 4p.		2949	5.9	6.36401	-0.464005	6.18813	6.46436
160730	160730-19@1	-20.65327620206068	118.7054463895291	granodiorite	strongly foliated biotite granodiorite	0.002017	6e-07	5.9	0.29	0.0015205	1.1e-06	I	2949	5	1.1	Geological Survey of Western Australia, 2021, Zircon oxygen isotope map of Western Australia: Geological Survey of Western Australia, digital data layer, <https://www.dmirs.wa.gov.au/geoview>	Nelson, DR 2001, 160730: foliated biotite granodiorite, Malindra Well; Geochronology Record 244: Geological Survey of Western Australia, 4p.		2949	5.9	6.36401	-0.464005	6.18813	6.46436
160730	160730-20@1	-20.65327620206068	118.7054463895291	granodiorite	strongly foliated biotite granodiorite	0.0020173	6e-07	6.01	0.3	0.0010109	1.8e-06	I	2950	4	1	Geological Survey of Western Australia, 2021, Zircon oxygen isotope map of Western Australia: Geological Survey of Western Australia, digital data layer, <https://www.dmirs.wa.gov.au/geoview>	Nelson, DR 2001, 160730: foliated biotite granodiorite, Malindra Well; Geochronology Record 244: Geological Survey of Western Australia, 4p.		2950	6.01	6.3564	-0.346402	6.17983	6.45625
160730	160730-10@1	-20.65327620206068	118.7054463895291	granodiorite	strongly foliated biotite granodiorite	0.0020167	6e-07	5.71	0.3	0.0022233	3.7e-06	I	2953	3	1.9	Geological Survey of Western Australia, 2021, Zircon oxygen isotope map of Western Australia: Geological Survey of Western Australia, digital data layer, <https://www.dmirs.wa.gov.au/geoview>	Nelson, DR 2001, 160730: foliated biotite granodiorite, Malindra Well; Geochronology Record 244: Geological Survey of Western Australia, 4p.		2953	5.71	6.33365	-0.623647	6.15539	6.43201
160730	160730-17@1	-20.65327620206068	118.7054463895291	granodiorite	strongly foliated biotite granodiorite	0.0020176	6e-07	6.16	0.28	0.0021634	5.7e-06	I	2954	4	0.6	Geological Survey of Western Australia, 2021, Zircon oxygen isotope map of Western Australia: Geological Survey of Western Australia, digital data layer, <https://www.dmirs.wa.gov.au/geoview>	Nelson, DR 2001, 160730: foliated biotite granodiorite, Malindra Well; Geochronology Record 244: Geological Survey of Western Australia, 4p.		2954	6.16	6.32608	-0.166077	6.14542	6.42397
216598	216598-13-1	-23.44089670122467	120.1722890387458	metarhyolite	fine-grained, foliated metarhyolite or metadacite	0.0020167	3e-07	5.73	0.16	0.0014639	4.7e-06	I	3155	5	8.2	Geological Survey of Western Australia, 2021, Zircon oxygen isotope map of Western Australia: Geological Survey of Western Australia, digital data layer, <https://www.dmirs.wa.gov.au/geoview>	Wingate, MTD, Lu, Y and Johnson, SP 2019, 216598: metarhyolite, Cubana Well; Geochronology Record 1568: Geological Survey of Western Australia, 5p.		2956	5.78	6.31095	-0.530954	6.12987	6.40737
216598	216598-3-1	-23.44089670122467	120.1722890387458	metarhyolite	fine-grained, foliated metarhyolite or metadacite	0.0020169	3e-07	5.84	0.16	0.0004861	5e-07	I	3163	10	7.1	Geological Survey of Western Australia, 2021, Zircon oxygen isotope map of Western Australia: Geological Survey of Western Australia, digital data layer, <https://www.dmirs.wa.gov.au/geoview>	Wingate, MTD, Lu, Y and Johnson, SP 2019, 216598: metarhyolite, Cubana Well; Geochronology Record 1568: Geological Survey of Western Australia, 5p.		2965	5.79	6.24295	-0.45295	6.05873	6.33525
216598	216598-12-1	-23.44089670122467	120.1722890387458	metarhyolite	fine-grained, foliated metarhyolite or metadacite	0.002017	4e-07	5.87	0.18	0.0008347	9e-07	I	3164	5	4.2	Geological Survey of Western Australia, 2021, Zircon oxygen isotope map of Western Australia: Geological Survey of Western Australia, digital data layer, <https://www.dmirs.wa.gov.au/geoview>	Wingate, MTD, Lu, Y and Johnson, SP 2019, 216598: metarhyolite, Cubana Well; Geochronology Record 1568: Geological Survey of Western Australia, 5p.		3039	5.5	5.75495	-0.254951	5.51704	5.85814
178012	178012-16@1	-21.976337136236676	120.21297653101097	metatonalite	fine- and even-grained, foliated, homogeneous biotite tonalite gneiss	0.0020155	5e-07	5.14	0.24	0.0008714	2e-06	I	3170	8	-8	Geological Survey of Western Australia, 2021, Zircon oxygen isotope map of Western Australia: Geological Survey of Western Australia, digital data layer, <https://www.dmirs.wa.gov.au/geoview>	Nelson, DR 2004, 178012: biotite tonalite gneiss, Quartz Hill; Geochronology Record 96: Geological Survey of Western Australia, 4p.		3039	5.5	5.75495	-0.254951	5.51704	5.85814
178012	178012-7@1	-21.976337136236676	120.21297653101097	metatonalite	fine- and even-grained, foliated, homogeneous biotite tonalite gneiss	0.0020154	4e-07	5.08	0.22	0.0010362	1.2e-06	I	3174	3	-1	Geological Survey of Western Australia, 2021, Zircon oxygen isotope map of Western Australia: Geological Survey of Western Australia, digital data layer, <https://www.dmirs.wa.gov.au/geoview>	Nelson, DR 2004, 178012: biotite tonalite gneiss, Quartz Hill; Geochronology Record 96: Geological Survey of Western Australia, 4p.		3041	6.6	5.75098	0.849019	5.51077	5.85385
216598	216598-18-1b	-23.44089670122467	120.1722890387458	metarhyolite	fine-grained, foliated metarhyolite or metadacite	0.0020164	3e-07	5.6	0.17	0.0005499	8e-07	I	3176	7	2.6	Geological Survey of Western Australia, 2021, Zircon oxygen isotope map of Western Australia: Geological Survey of Western Australia, digital data layer, <https://www.dmirs.wa.gov.au/geoview>	Wingate, MTD, Lu, Y and Johnson, SP 2019, 216598: metarhyolite, Cubana Well; Geochronology Record 1568: Geological Survey of Western Australia, 5p.		3041	6.9	5.75098	1.14902	5.51077	5.85385
216598	216598-18-1	-23.44089670122467	120.1722890387458	metarhyolite	fine-grained, foliated metarhyolite or metadacite	0.0020165	4e-07	5.65	0.18	0.0007077	3.3e-06	I	3176	7	2.6	Geological Survey of Western Australia, 2021, Zircon oxygen isotope map of Western Australia: Geological Survey of Western Australia, digital data layer, <https://www.dmirs.wa.gov.au/geoview>	Wingate, MTD, Lu, Y and Johnson, SP 2019, 216598: metarhyolite, Cubana Well; Geochronology Record 1568: Geological Survey of Western Australia, 5p.		3041	6.9	5.75098	1.14902	5.51077	5.85385
178012	178012-18@1	-21.976337136236676	120.21297653101097	metatonalite	fine- and even-grained, foliated, homogeneous biotite tonalite gneiss	0.0020158	5e-07	5.31	0.23	0.0008279	1.6e-06	I	3178	4	-3	Geological Survey of Western Australia, 2021, Zircon oxygen isotope map of Western Australia: Geological Survey of Western Australia, digital data layer, <https://www.dmirs.wa.gov.au/geoview>	Nelson, DR 2004, 178012: biotite tonalite gneiss, Quartz Hill; Geochronology Record 96: Geological Survey of Western Australia, 4p.		3041	7	5.75098	1.24902	5.51077	5.85385
178012	178012-21@1	-21.976337136236676	120.21297653101097	metatonalite	fine- and even-grained, foliated, homogeneous biotite tonalite gneiss	0.0020154	5e-07	5.1	0.23	0.0007855	1.3e-06	I	3180	7	-4	Geological Survey of Western Australia, 2021, Zircon oxygen isotope map of Western Australia: Geological Survey of Western Australia, digital data layer, <https://www.dmirs.wa.gov.au/geoview>	Nelson, DR 2004, 178012: biotite tonalite gneiss, Quartz Hill; Geochronology Record 96: Geological Survey of Western Australia, 4p.		3047	6.2	5.74198	0.458025	5.49338	5.85089
178012	178012-17@1	-21.976337136236676	120.21297653101097	metatonalite	fine- and even-grained, foliated, homogeneous biotite tonalite gneiss	0.0020158	5e-07	5.26	0.27	0.0007696	1.5e-06	I	3181	6	-4	Geological Survey of Western Australia, 2021, Zircon oxygen isotope map of Western Australia: Geological Survey of Western Australia, digital data layer, <https://www.dmirs.wa.gov.au/geoview>	Nelson, DR 2004, 178012: biotite tonalite gneiss, Quartz Hill; Geochronology Record 96: Geological Survey of Western Australia, 4p.		3047	7.1	5.74198	1.35802	5.49338	5.85089
216598	216598-10-1	-23.44089670122467	120.1722890387458	metarhyolite	fine-grained, foliated metarhyolite or metadacite	0.0020162	3e-07	5.48	0.17	0.0010036	5.5e-06	I	3183	6	1.5	Geological Survey of Western Australia, 2021, Zircon oxygen isotope map of Western Australia: Geological Survey of Western Australia, digital data layer, <https://www.dmirs.wa.gov.au/geoview>	Wingate, MTD, Lu, Y and Johnson, SP 2019, 216598: metarhyolite, Cubana Well; Geochronology Record 1568: Geological Survey of Western Australia, 5p.		3053	4.9	5.74983	-0.84983	5.48466	5.8732
216598	216598-2-1	-23.44089670122467	120.1722890387458	metarhyolite	fine-grained, foliated metarhyolite or metadacite	0.0020168	3e-07	5.81	0.17	0.0008322	2.4e-06	I	3184	8	1.7	Geological Survey of Western Australia, 2021, Zircon oxygen isotope map of Western Australia: Geological Survey of Western Australia, digital data layer, <https://www.dmirs.wa.gov.au/geoview>	Wingate, MTD, Lu, Y and Johnson, SP 2019, 216598: metarhyolite, Cubana Well; Geochronology Record 1568: Geological Survey of Western Australia, 5p.		3053	6	5.74983	0.25017	5.48466	5.8732
178012	178012-5@1	-21.976337136236676	120.21297653101097	metatonalite	fine- and even-grained, foliated, homogeneous biotite tonalite gneiss	0.0020151	5e-07	4.95	0.23	0.001004	1.3e-06	I	3186	5	-1	Geological Survey of Western Australia, 2021, Zircon oxygen isotope map of Western Australia: Geological Survey of Western Australia, digital data layer, <https://www.dmirs.wa.gov.au/geoview>	Nelson, DR 2004, 178012: biotite tonalite gneiss, Quartz Hill; Geochronology Record 96: Geological Survey of Western Australia, 4p.		3058	5.9	5.75278	0.147216	5.47905	5.89099
216598	216598-11-1	-23.44089670122467	120.1722890387458	metarhyolite	fine-grained, foliated metarhyolite or metadacite	0.0020163	3e-07	5.52	0.17	0.001395	2.3e-06	I	3186	6	2.6	Geological Survey of Western Australia, 2021, Zircon oxygen isotope map of Western Australia: Geological Survey of Western Australia, digital data layer, <https://www.dmirs.wa.gov.au/geoview>	Wingate, MTD, Lu, Y and Johnson, SP 2019, 216598: metarhyolite, Cubana Well; Geochronology Record 1568: Geological Survey of Western Australia, 5p.		3058	5.7	5.75278	-0.0527843	5.47905	5.89099
216598	216598-4-1	-23.44089670122467	120.1722890387458	metarhyolite	fine-grained, foliated metarhyolite or metadacite	0.0020173	3e-07	6.02	0.16	0.0006426	5e-07	I	3186	10	3.2	Geological Survey of Western Australia, 2021, Zircon oxygen isotope map of Western Australia: Geological Survey of Western Australia, digital data layer, <https://www.dmirs.wa.gov.au/geoview>	Wingate, MTD, Lu, Y and Johnson, SP 2019, 216598: metarhyolite, Cubana Well; Geochronology Record 1568: Geological Survey of Western Australia, 5p.		3060	6.2	5.7494	0.450599	5.47787	5.89082
178012	178012-19@1	-21.976337136236676	120.21297653101097	metatonalite	fine- and even-grained, foliated, homogeneous biotite tonalite gneiss	0.0020158	5e-07	5.28	0.26	0.0007928	1.1e-06	I	3189	6	1	Geological Survey of Western Australia, 2021, Zircon oxygen isotope map of Western Australia: Geological Survey of Western Australia, digital data layer, <https://www.dmirs.wa.gov.au/geoview>	Nelson, DR 2004, 178012: biotite tonalite gneiss, Quartz Hill; Geochronology Record 96: Geological Survey of Western Australia, 4p.		3062	4.9	5.74075	-0.840752	5.46947	5.88018
216598	216598-5-1	-23.44089670122467	120.1722890387458	metarhyolite	fine-grained, foliated metarhyolite or metadacite	0.0020172	3e-07	5.97	0.17	0.000793	8e-07	I	3195	16	5.2	Geological Survey of Western Australia, 2021, Zircon oxygen isotope map of Western Australia: Geological Survey of Western Australia, digital data layer, <https://www.dmirs.wa.gov.au/geoview>	Wingate, MTD, Lu, Y and Johnson, SP 2019, 216598: metarhyolite, Cubana Well; Geochronology Record 1568: Geological Survey of Western Australia, 5p.		3065	4.9	5.72638	-0.826376	5.46421	5.86524
216598	216598-5-1b	-23.44089670122467	120.1722890387458	metarhyolite	fine-grained, foliated metarhyolite or metadacite	0.002018	4e-07	6.36	0.18	0.0011572	1e-06	I	3195	16	5.2	Geological Survey of Western Australia, 2021, Zircon oxygen isotope map of Western Australia: Geological Survey of Western Australia, digital data layer, <https://www.dmirs.wa.gov.au/geoview>	Wingate, MTD, Lu, Y and Johnson, SP 2019, 216598: metarhyolite, Cubana Well; Geochronology Record 1568: Geological Survey of Western Australia, 5p.		3067	5	5.71485	-0.714852	5.45757	5.85348
195893	195893-2@1	-22.829606842948973	117.37932815703898	metagranodiorite	massive, coarse-grained, inequigranular biotite metagranodiorite	0.0020174	4e-07	6.1	0.19	0.0008314	1.5e-06	I	3211	10	1.1	Geological Survey of Western Australia, 2021, Zircon oxygen isotope map of Western Australia: Geological Survey of Western Australia, digital data layer, <https://www.dmirs.wa.gov.au/geoview>	Wingate, MTD, Lu, Y, Kirkland, CL and Johnson, SP 2018, 195893: metagranodiorite, Sandy Creek Well; Geochronology Record 1474: Geological Survey of Western Australia, 4p.		3067	5.1	5.71485	-0.614852	5.45757	5.85348
195893	195893-11@1	-22.829606842948973	117.37932815703898	metagranodiorite	massive, coarse-grained, inequigranular biotite metagranodiorite	0.0020162	3e-07	5.49	0.13	0.0008335	1.6e-06	I	3212	5	7.8	Geological Survey of Western Australia, 2021, Zircon oxygen isotope map of Western Australia: Geological Survey of Western Australia, digital data layer, <https://www.dmirs.wa.gov.au/geoview>	Wingate, MTD, Lu, Y, Kirkland, CL and Johnson, SP 2018, 195893: metagranodiorite, Sandy Creek Well; Geochronology Record 1474: Geological Survey of Western Australia, 4p.		3073	5.3	5.67068	-0.370684	5.42616	5.79907
195893	195893-18@1	-22.829606842948973	117.37932815703898	metagranodiorite	massive, coarse-grained, inequigranular biotite metagranodiorite	0.0020175	3e-07	6.14	0.14	0.0008676	1.6e-06	I	3215	7	1.1	Geological Survey of Western Australia, 2021, Zircon oxygen isotope map of Western Australia: Geological Survey of Western Australia, digital data layer, <https://www.dmirs.wa.gov.au/geoview>	Wingate, MTD, Lu, Y, Kirkland, CL and Johnson, SP 2018, 195893: metagranodiorite, Sandy Creek Well; Geochronology Record 1474: Geological Survey of Western Australia, 4p.		3076	5.6	5.6489	-0.0489043	5.41305	5.77408
195894	195894-6-1	-22.795097187672802	117.30144730342606	granodiorite	fine- to medium-grained granodiorite	0.0020174	4e-07	6.09	0.2	0.0008622	7.5e-06	I	3220	8	0.4	Geological Survey of Western Australia, 2021, Zircon oxygen isotope map of Western Australia: Geological Survey of Western Australia, digital data layer, <https://www.dmirs.wa.gov.au/geoview>	Wingate, MTD, Lu, Y, Kirkland, CL and Johnson, SP 2018, 195894: granodiorite, Mithgoondy Well; Geochronology Record 1475: Geological Survey of Western Australia, 4p.		3076	5.7	5.6489	0.0510957	5.41305	5.77408
195893	195893-27@1	-22.829606842948973	117.37932815703898	metagranodiorite	massive, coarse-grained, inequigranular biotite metagranodiorite	0.0020168	3e-07	5.78	0.16	0.0008457	1.5e-06	I	3221	5	1.3	Geological Survey of Western Australia, 2021, Zircon oxygen isotope map of Western Australia: Geological Survey of Western Australia, digital data layer, <https://www.dmirs.wa.gov.au/geoview>	Wingate, MTD, Lu, Y, Kirkland, CL and Johnson, SP 2018, 195893: metagranodiorite, Sandy Creek Well; Geochronology Record 1474: Geological Survey of Western Australia, 4p.		3087	5.8	5.58465	0.215353	5.3784	5.70322
142535	142535-15-1	-21.388015618677493	116.50441970383291	tonalite	foliated hornblendeûbiotite tonalite	0.0020164	5e-07	5.59	0.27	0.0005227	8.1e-06	I	3221	7	3	Geological Survey of Western Australia, 2021, Zircon oxygen isotope map of Western Australia: Geological Survey of Western Australia, digital data layer, <https://www.dmirs.wa.gov.au/geoview>	Nelson, DR 1998, 142535: foliated hornblende-biotite tonalite, Tarlwa Pool; Geochronology Record 406: Geological Survey of Western Australia, 3p.		3087	6	5.58465	0.415353	5.3784	5.70322
195893	195893-19@1	-22.829606842948973	117.37932815703898	metagranodiorite	massive, coarse-grained, inequigranular biotite metagranodiorite	0.0020164	4e-07	5.59	0.19	0.0007916	1.7e-06	I	3222	7	3	Geological Survey of Western Australia, 2021, Zircon oxygen isotope map of Western Australia: Geological Survey of Western Australia, digital data layer, <https://www.dmirs.wa.gov.au/geoview>	Wingate, MTD, Lu, Y, Kirkland, CL and Johnson, SP 2018, 195893: metagranodiorite, Sandy Creek Well; Geochronology Record 1474: Geological Survey of Western Australia, 4p.		3110	5.8	5.47392	0.326083	5.31234	5.58877
195893	195893-14@1	-22.829606842948973	117.37932815703898	metagranodiorite	massive, coarse-grained, inequigranular biotite metagranodiorite	0.0020179	3e-07	6.33	0.14	0.0010402	2.2e-06	I	3223	6	3.3	Geological Survey of Western Australia, 2021, Zircon oxygen isotope map of Western Australia: Geological Survey of Western Australia, digital data layer, <https://www.dmirs.wa.gov.au/geoview>	Wingate, MTD, Lu, Y, Kirkland, CL and Johnson, SP 2018, 195893: metagranodiorite, Sandy Creek Well; Geochronology Record 1474: Geological Survey of Western Australia, 4p.		3113	5.4	5.46004	-0.060036	5.30358	5.58114
195893	195893-13@1	-22.829606842948973	117.37932815703898	metagranodiorite	massive, coarse-grained, inequigranular biotite metagranodiorite	0.0020178	2e-07	6.3	0.12	0.0007941	1.8e-06	I	3224	8	1	Geological Survey of Western Australia, 2021, Zircon oxygen isotope map of Western Australia: Geological Survey of Western Australia, digital data layer, <https://www.dmirs.wa.gov.au/geoview>	Wingate, MTD, Lu, Y, Kirkland, CL and Johnson, SP 2018, 195893: metagranodiorite, Sandy Creek Well; Geochronology Record 1474: Geological Survey of Western Australia, 4p.		3114	5.6	5.45545	0.144545	5.30067	5.57843
195893	195893-7@1	-22.829606842948973	117.37932815703898	metagranodiorite	massive, coarse-grained, inequigranular biotite metagranodiorite	0.0020172	3e-07	5.97	0.14	0.0008261	1.8e-06	I	3225	5	0.5	Geological Survey of Western Australia, 2021, Zircon oxygen isotope map of Western Australia: Geological Survey of Western Australia, digital data layer, <https://www.dmirs.wa.gov.au/geoview>	Wingate, MTD, Lu, Y, Kirkland, CL and Johnson, SP 2018, 195893: metagranodiorite, Sandy Creek Well; Geochronology Record 1474: Geological Survey of Western Australia, 4p.		3115	5	5.4509	-0.450903	5.29735	5.5747
195893	195893-6@1	-22.829606842948973	117.37932815703898	metagranodiorite	massive, coarse-grained, inequigranular biotite metagranodiorite	0.0020174	3e-07	6.08	0.16	0.0008184	1.9e-06	I	3225	5	2.1	Geological Survey of Western Australia, 2021, Zircon oxygen isotope map of Western Australia: Geological Survey of Western Australia, digital data layer, <https://www.dmirs.wa.gov.au/geoview>	Wingate, MTD, Lu, Y, Kirkland, CL and Johnson, SP 2018, 195893: metagranodiorite, Sandy Creek Well; Geochronology Record 1474: Geological Survey of Western Australia, 4p.		3115	5.4	5.4509	-0.0509028	5.29735	5.5747
142535	142535-7-1a	-21.388015618677493	116.50441970383291	tonalite	foliated hornblendeûbiotite tonalite	0.0020165	5e-07	5.62	0.25	0.0001647	1.2e-06	I	3226	7	-0.6	Geological Survey of Western Australia, 2021, Zircon oxygen isotope map of Western Australia: Geological Survey of Western Australia, digital data layer, <https://www.dmirs.wa.gov.au/geoview>	Nelson, DR 1998, 142535: foliated hornblende-biotite tonalite, Tarlwa Pool; Geochronology Record 406: Geological Survey of Western Australia, 3p.		3116	5.3	5.44639	-0.146386	5.29548	5.56986
195894	195894-3-1	-22.795097187672802	117.30144730342606	granodiorite	fine- to medium-grained granodiorite	0.0020175	4e-07	6.16	0.18	0.0009174	4.6e-06	I	3226	7	0.4	Geological Survey of Western Australia, 2021, Zircon oxygen isotope map of Western Australia: Geological Survey of Western Australia, digital data layer, <https://www.dmirs.wa.gov.au/geoview>	Wingate, MTD, Lu, Y, Kirkland, CL and Johnson, SP 2018, 195894: granodiorite, Mithgoondy Well; Geochronology Record 1475: Geological Survey of Western Australia, 4p.		3116	5	5.44639	-0.446386	5.29548	5.56986
195893	195893-8@1	-22.829606842948973	117.37932815703898	metagranodiorite	massive, coarse-grained, inequigranular biotite metagranodiorite	0.0020166	3e-07	5.69	0.13	0.0008695	1.7e-06	I	3227	6	0.7	Geological Survey of Western Australia, 2021, Zircon oxygen isotope map of Western Australia: Geological Survey of Western Australia, digital data layer, <https://www.dmirs.wa.gov.au/geoview>	Wingate, MTD, Lu, Y, Kirkland, CL and Johnson, SP 2018, 195893: metagranodiorite, Sandy Creek Well; Geochronology Record 1474: Geological Survey of Western Australia, 4p.		3117	5.8	5.44191	0.358089	5.29048	5.56733
[truncated: 299 more rows]

## Sheet: Supplementary table  6
Supplemental Table S6: Zircon Hf crustal residence timeseries from the Pilbara Craton
[truncated: 40 more rows]

[truncated: 2 more sheets: Supplementary table 7, G50513]
